# Supplementary material for: Thermoresponsive and Xenon Triggered Gate-opening in Flexible Three-dimensional Covalent Organic Framework for Xenon/Krypton Separation
Source: Research Square preprint supplement (doi:10.21203/rs.3.rs-7885074/v1), 2025-10-24
Supplement: Supplementary file 1 [file 80db7c33e5607e11c4649c35.docx]

**Supplementary information**

**Thermoresponsive and Xenon Triggered Gate-opening in Flexible Three-dimensional Covalent Organic Framework for Xenon/Krypton Separation**

Yongzheng Wang,[a] Shanshan Wang,[a] Yinhui Li,[a] Shizhen Liu,[a] Qingxin Liang,[a] Bin Chen,[a,b] Wenxiang Zhang,[a] Heping Ma*[a]

[a] State Key Laboratory of Fluorine & Nitrogen Chemicals, School of Chemical Engineering and Technology, Xi’an Jiaotong University, Xi’an, Shaanxi 710049, China.

[b] Northwest Institute of Nuclear Technology, Xi’an, Shaanxi 710024, China.

Email: [maheping@mail.xjtu.edu.cn](mailto:maheping@mail.xjtu.edu.cn)

**Table of contents**

[Section 1. Synthesis of FCOF-XJ 3](#_Toc204544387)

[Section 2. Charaterization of FCOF-XJ 5](#_Toc204544388)

[Section 3. Calculation procedures of isoteric adsorption enthalpy 10](#_Toc204544389)

[Section 4. Calculation of selectivity using S(DIH) equation 12](#_Toc204544390)

[Section 5. Crystal structure of FCOF-XJ 15](#_Toc204544391)

[Section 6. Column Breakthrough Measurement Experiments 30](#_Toc204544392)

[Section 7. References 36](#_Toc204544393)

# Section 1. Synthesis of FCOF-XJ

FCOF-XJ was synthesized by the literature method.1 Tetrakis[(4-formylphenoxy)methyl]methane (TFPM) (44.2 mg, 0.08 mmol) and tetra(p-aminophenyl)methane (TAPM) (30.4 mg, 0.08 mmol) were placed in a Pyrex tube with mesitylene (2.8 mL), chloroform (1.2 mL), and 12 M aqueous acetic acid (0.4 mL). The tube was flash frozen in a liquid nitrogen bath (77 K), degassed through three freeze−pump−thaw cycles, sealed under vacuum, and then heated at 120 °C for 7 days. The mixture was cooled to room temperature, and the resulting precipitate was filtered, exhaustively washed by Soxhlet extractions with tetrahydrofuran and dichloromethane, and dried at 90 °C under vacuum for 24 h. The activated FCOF-XJ was isolated as a violet powder (60 mg, 75% yield).


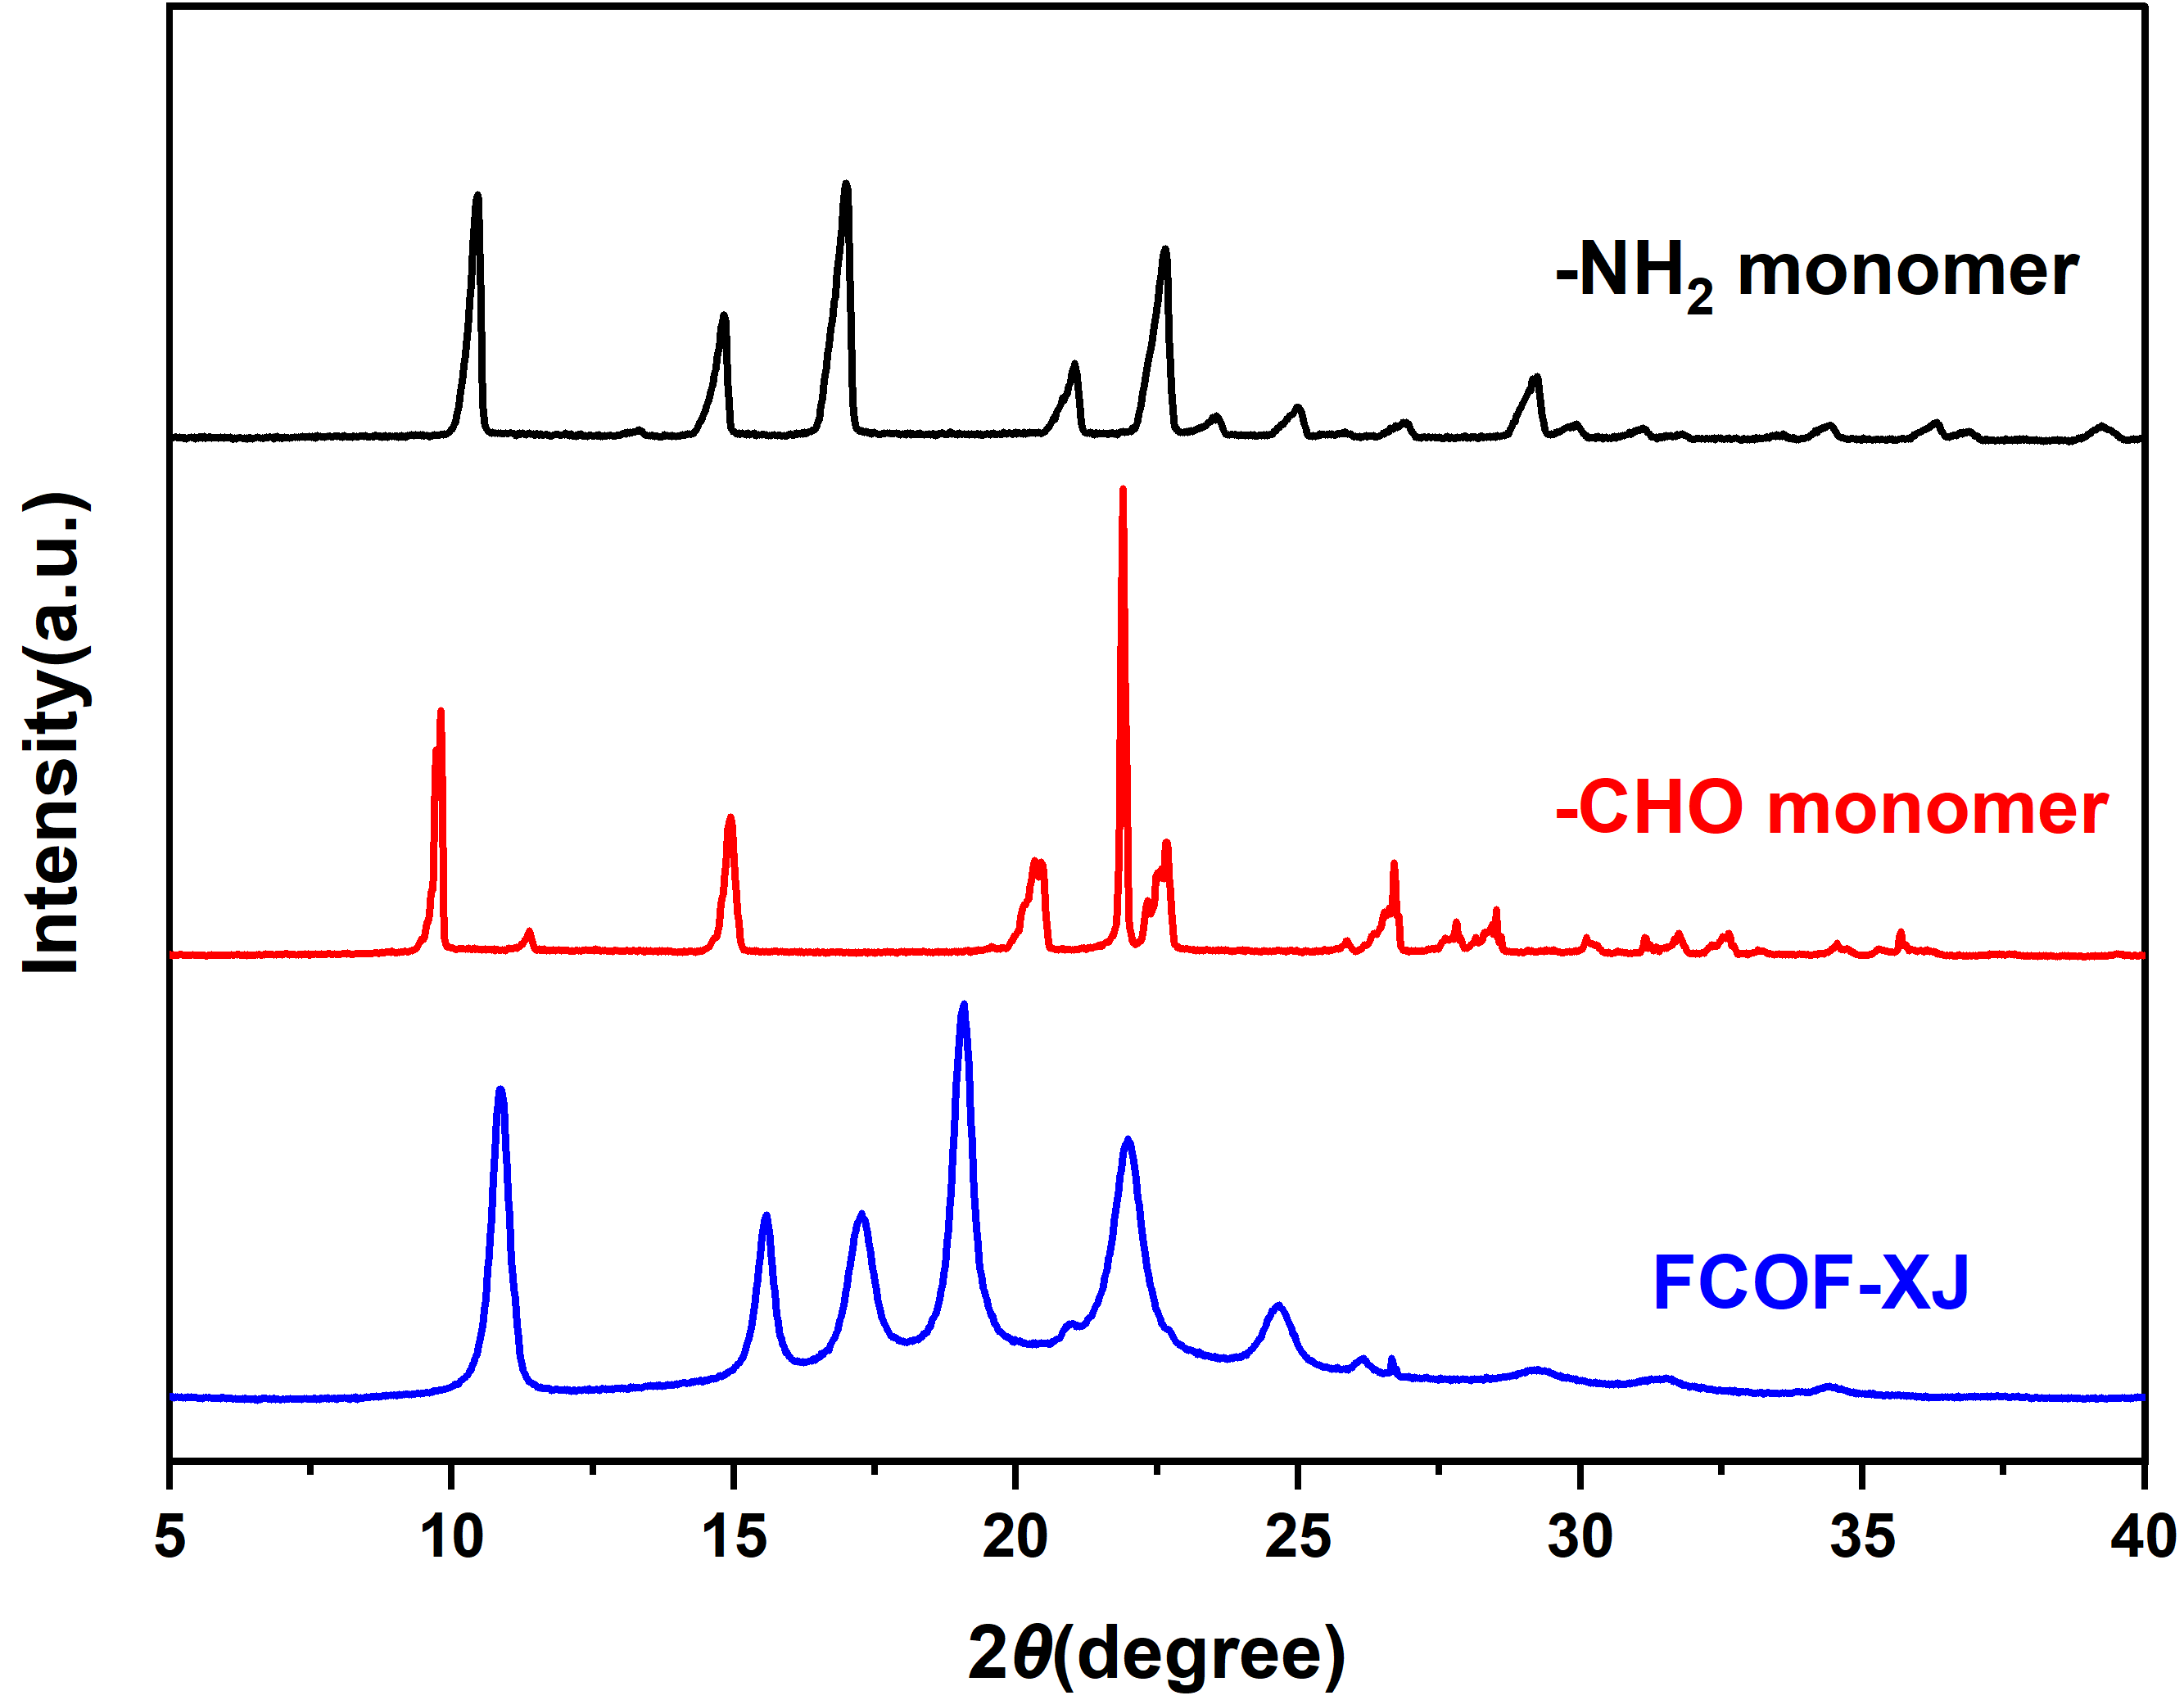


**Figure S1**. PXRD patterns of amino monomer (black), aldehyde monomer (red) and FCOF-XJ (blue).


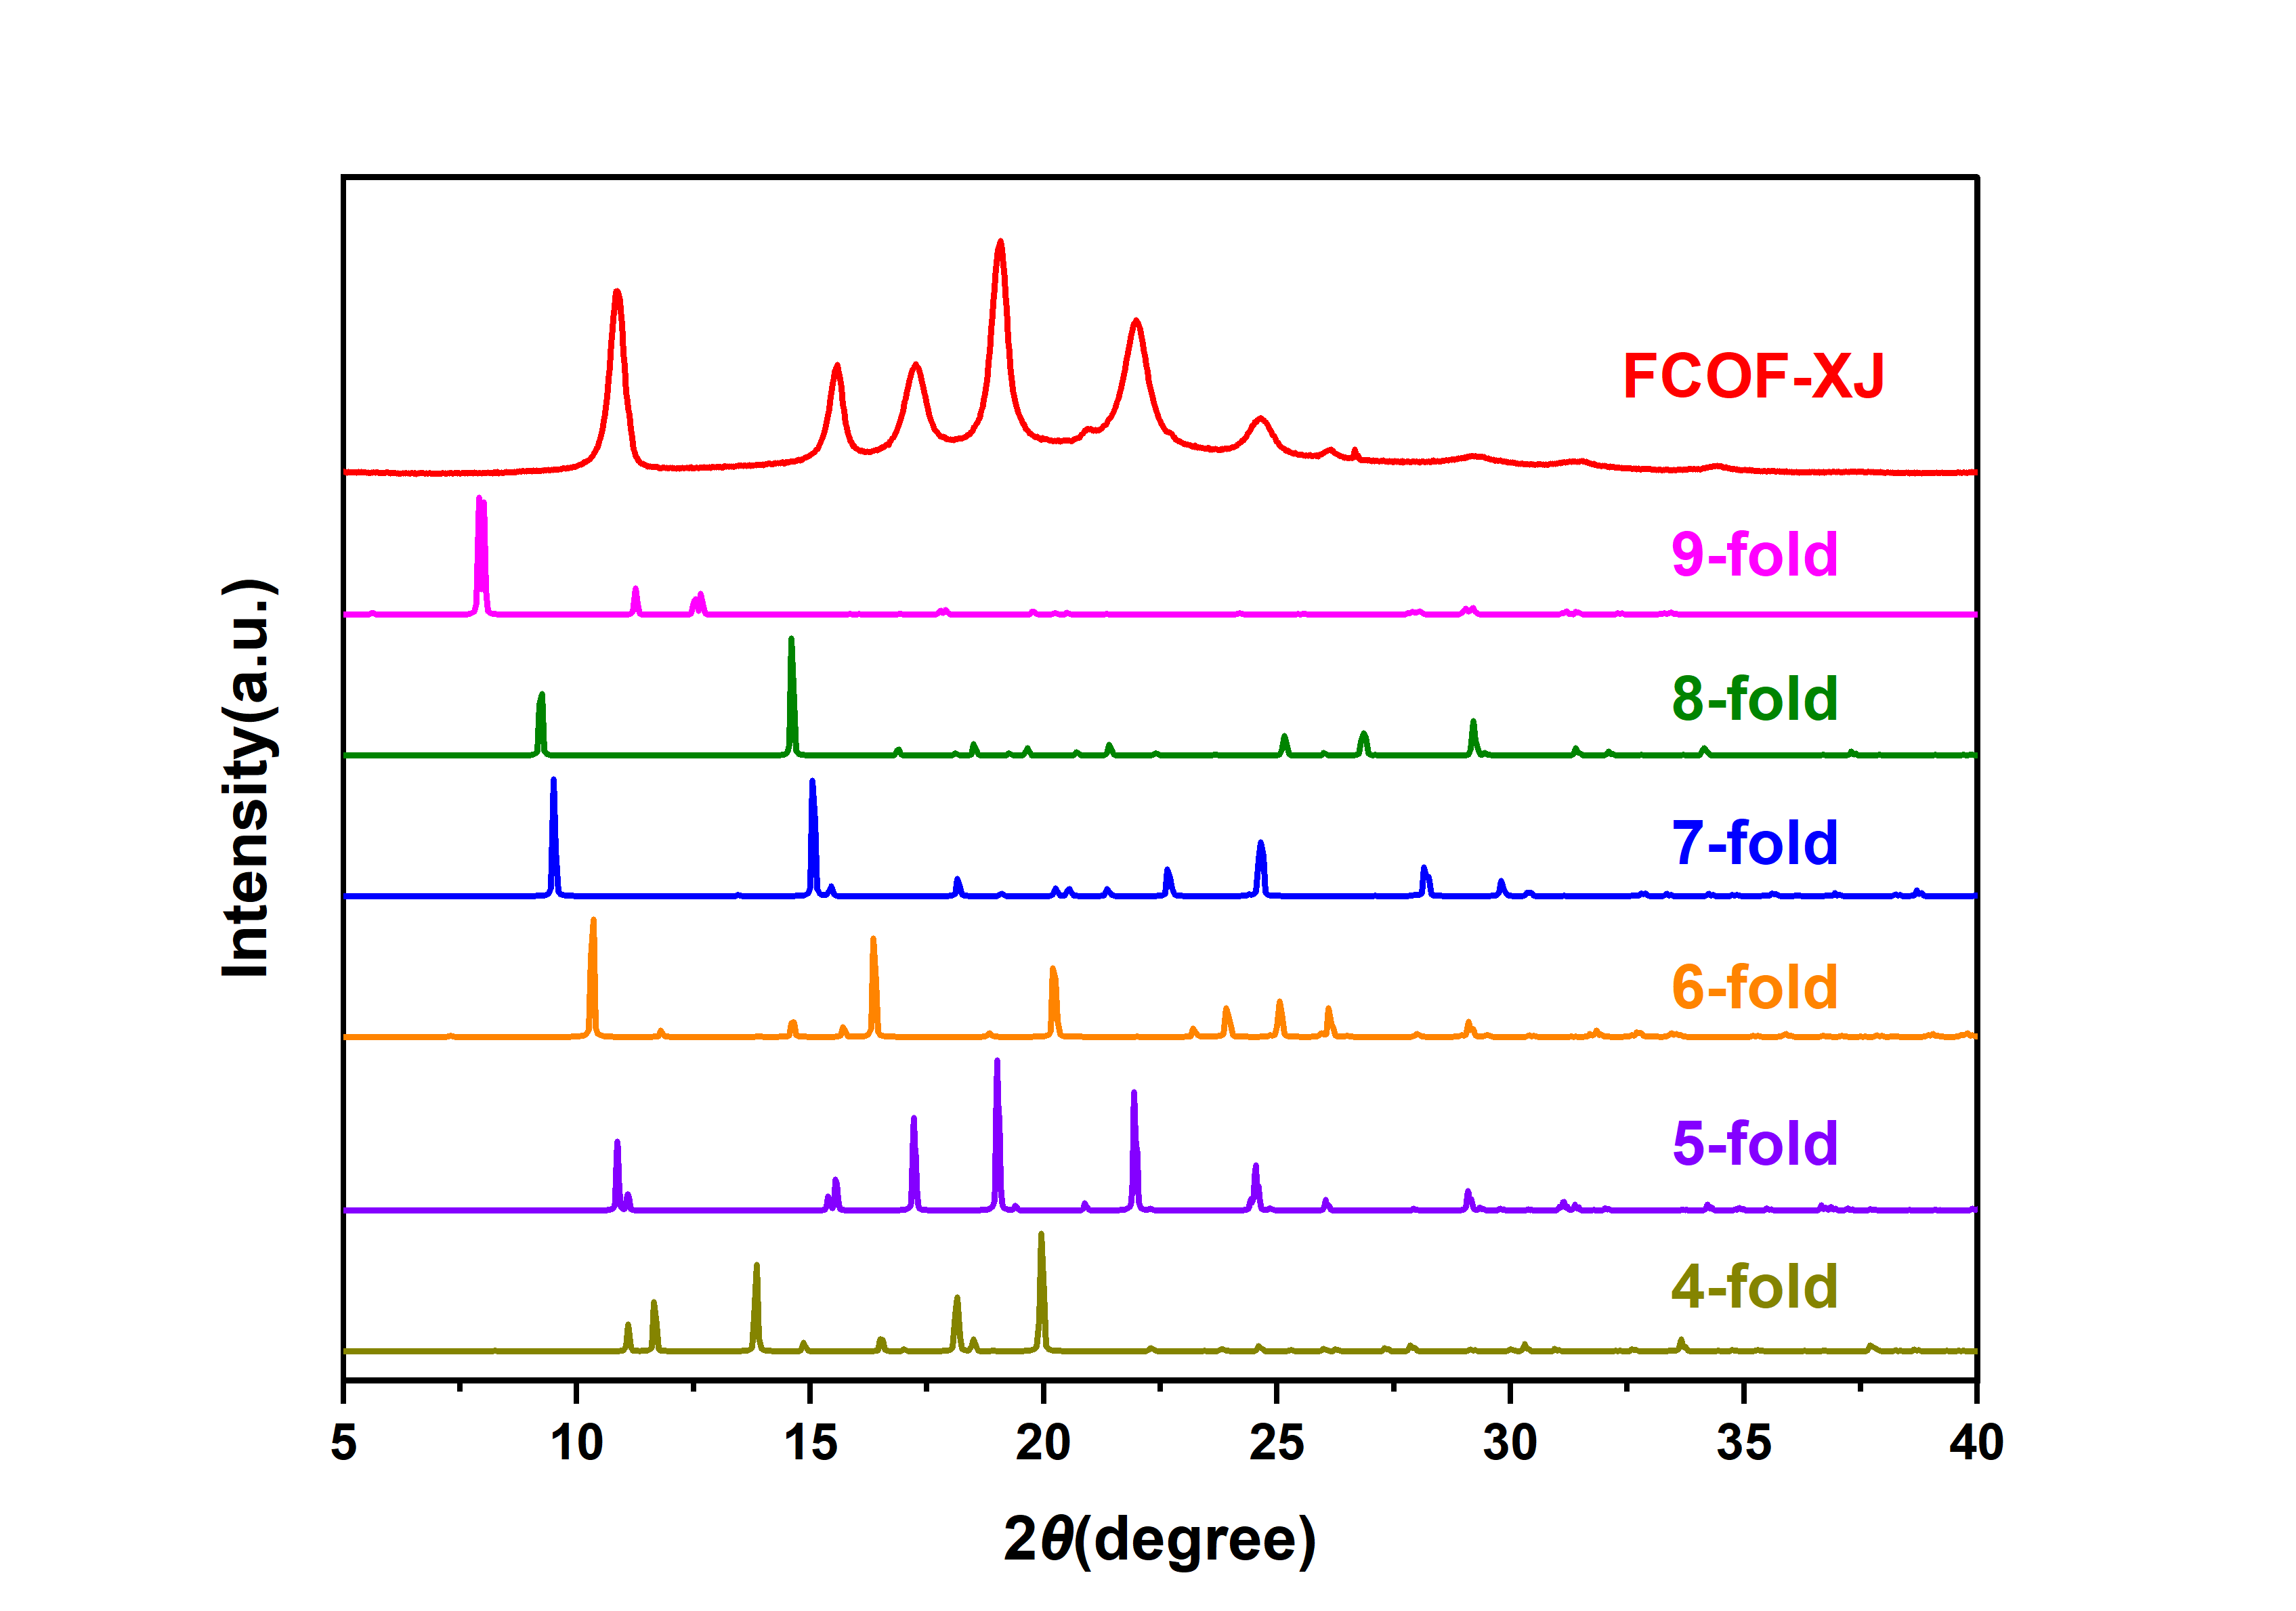


**Figure S2.** Simulated XRD curves of structures with different interpenetration degrees.

# Section 2. Charaterization of FCOF-XJ

**FI-TR Spectroscopy Analysis**


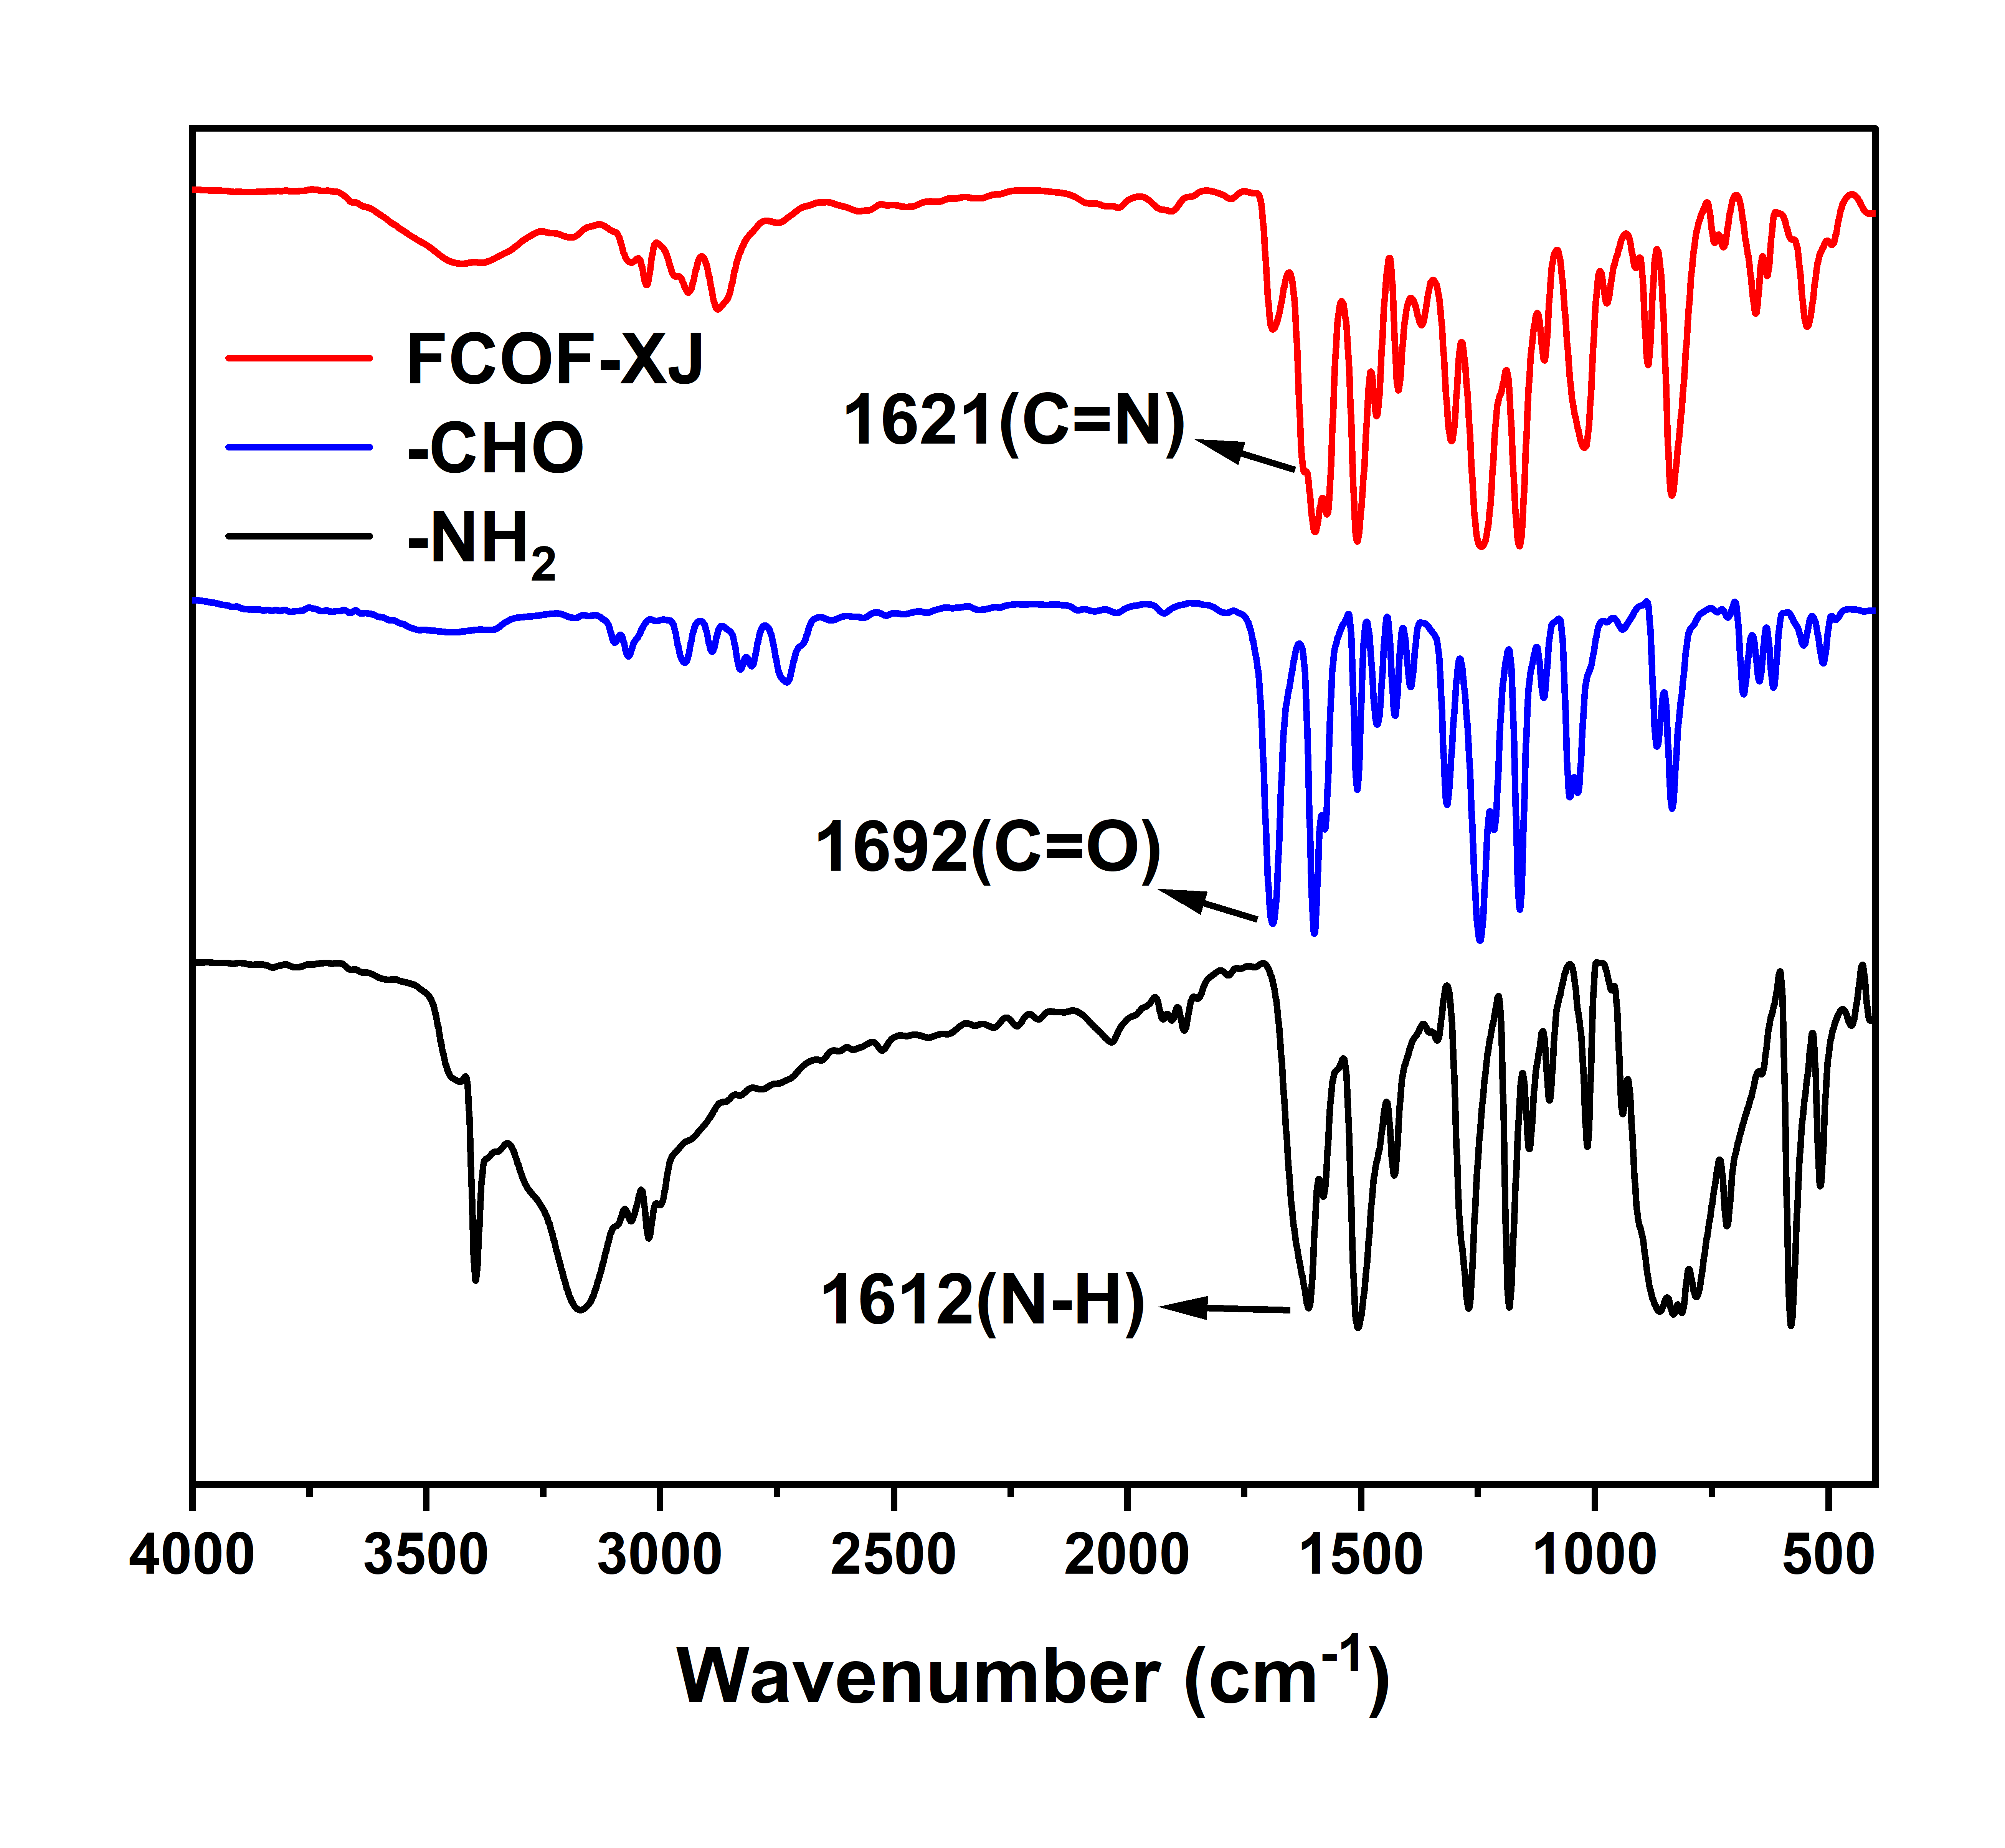


**Figure S3**. FI-TR spectra of FCOF-XJ, -CHO and -NH2. The peak appearing at 1621 cm-1 is attributed to the imine-linked C=N.

**13C Solid-State NMR Spectroscopy**


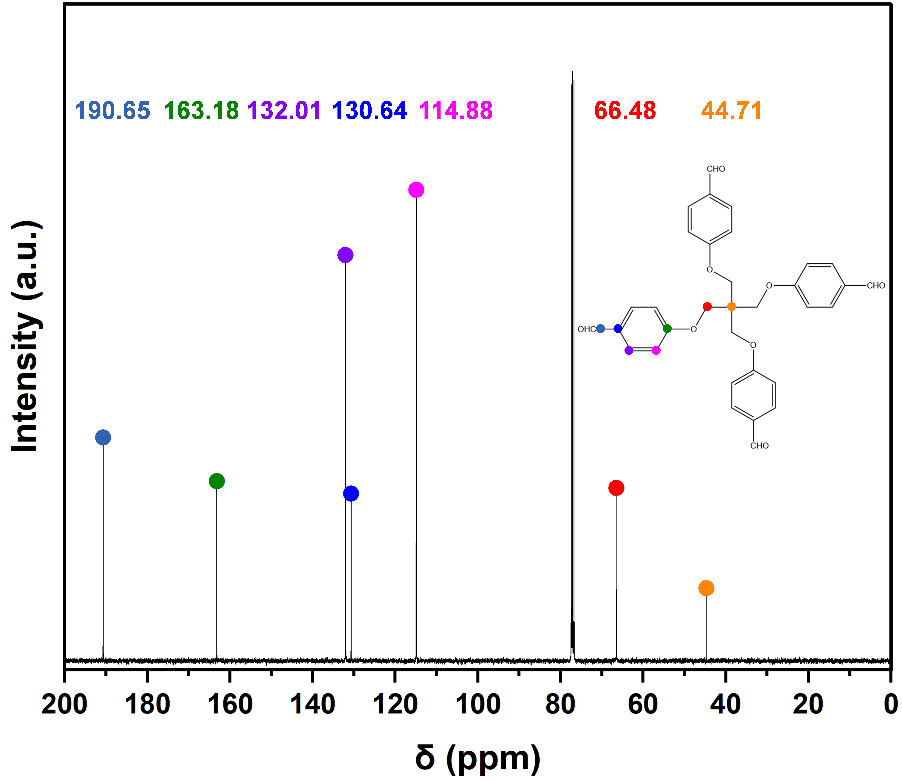


**Figure S4**. 13C NMR spectrum of TFPM.


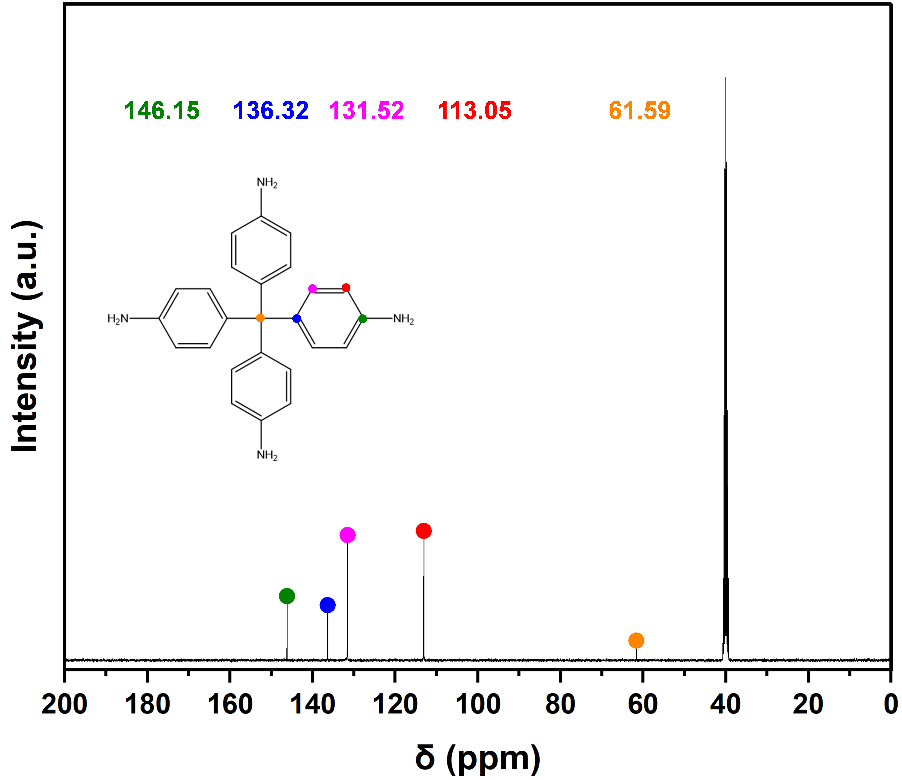


**Figure S5**. 13C NMR spectrum of TAPM.


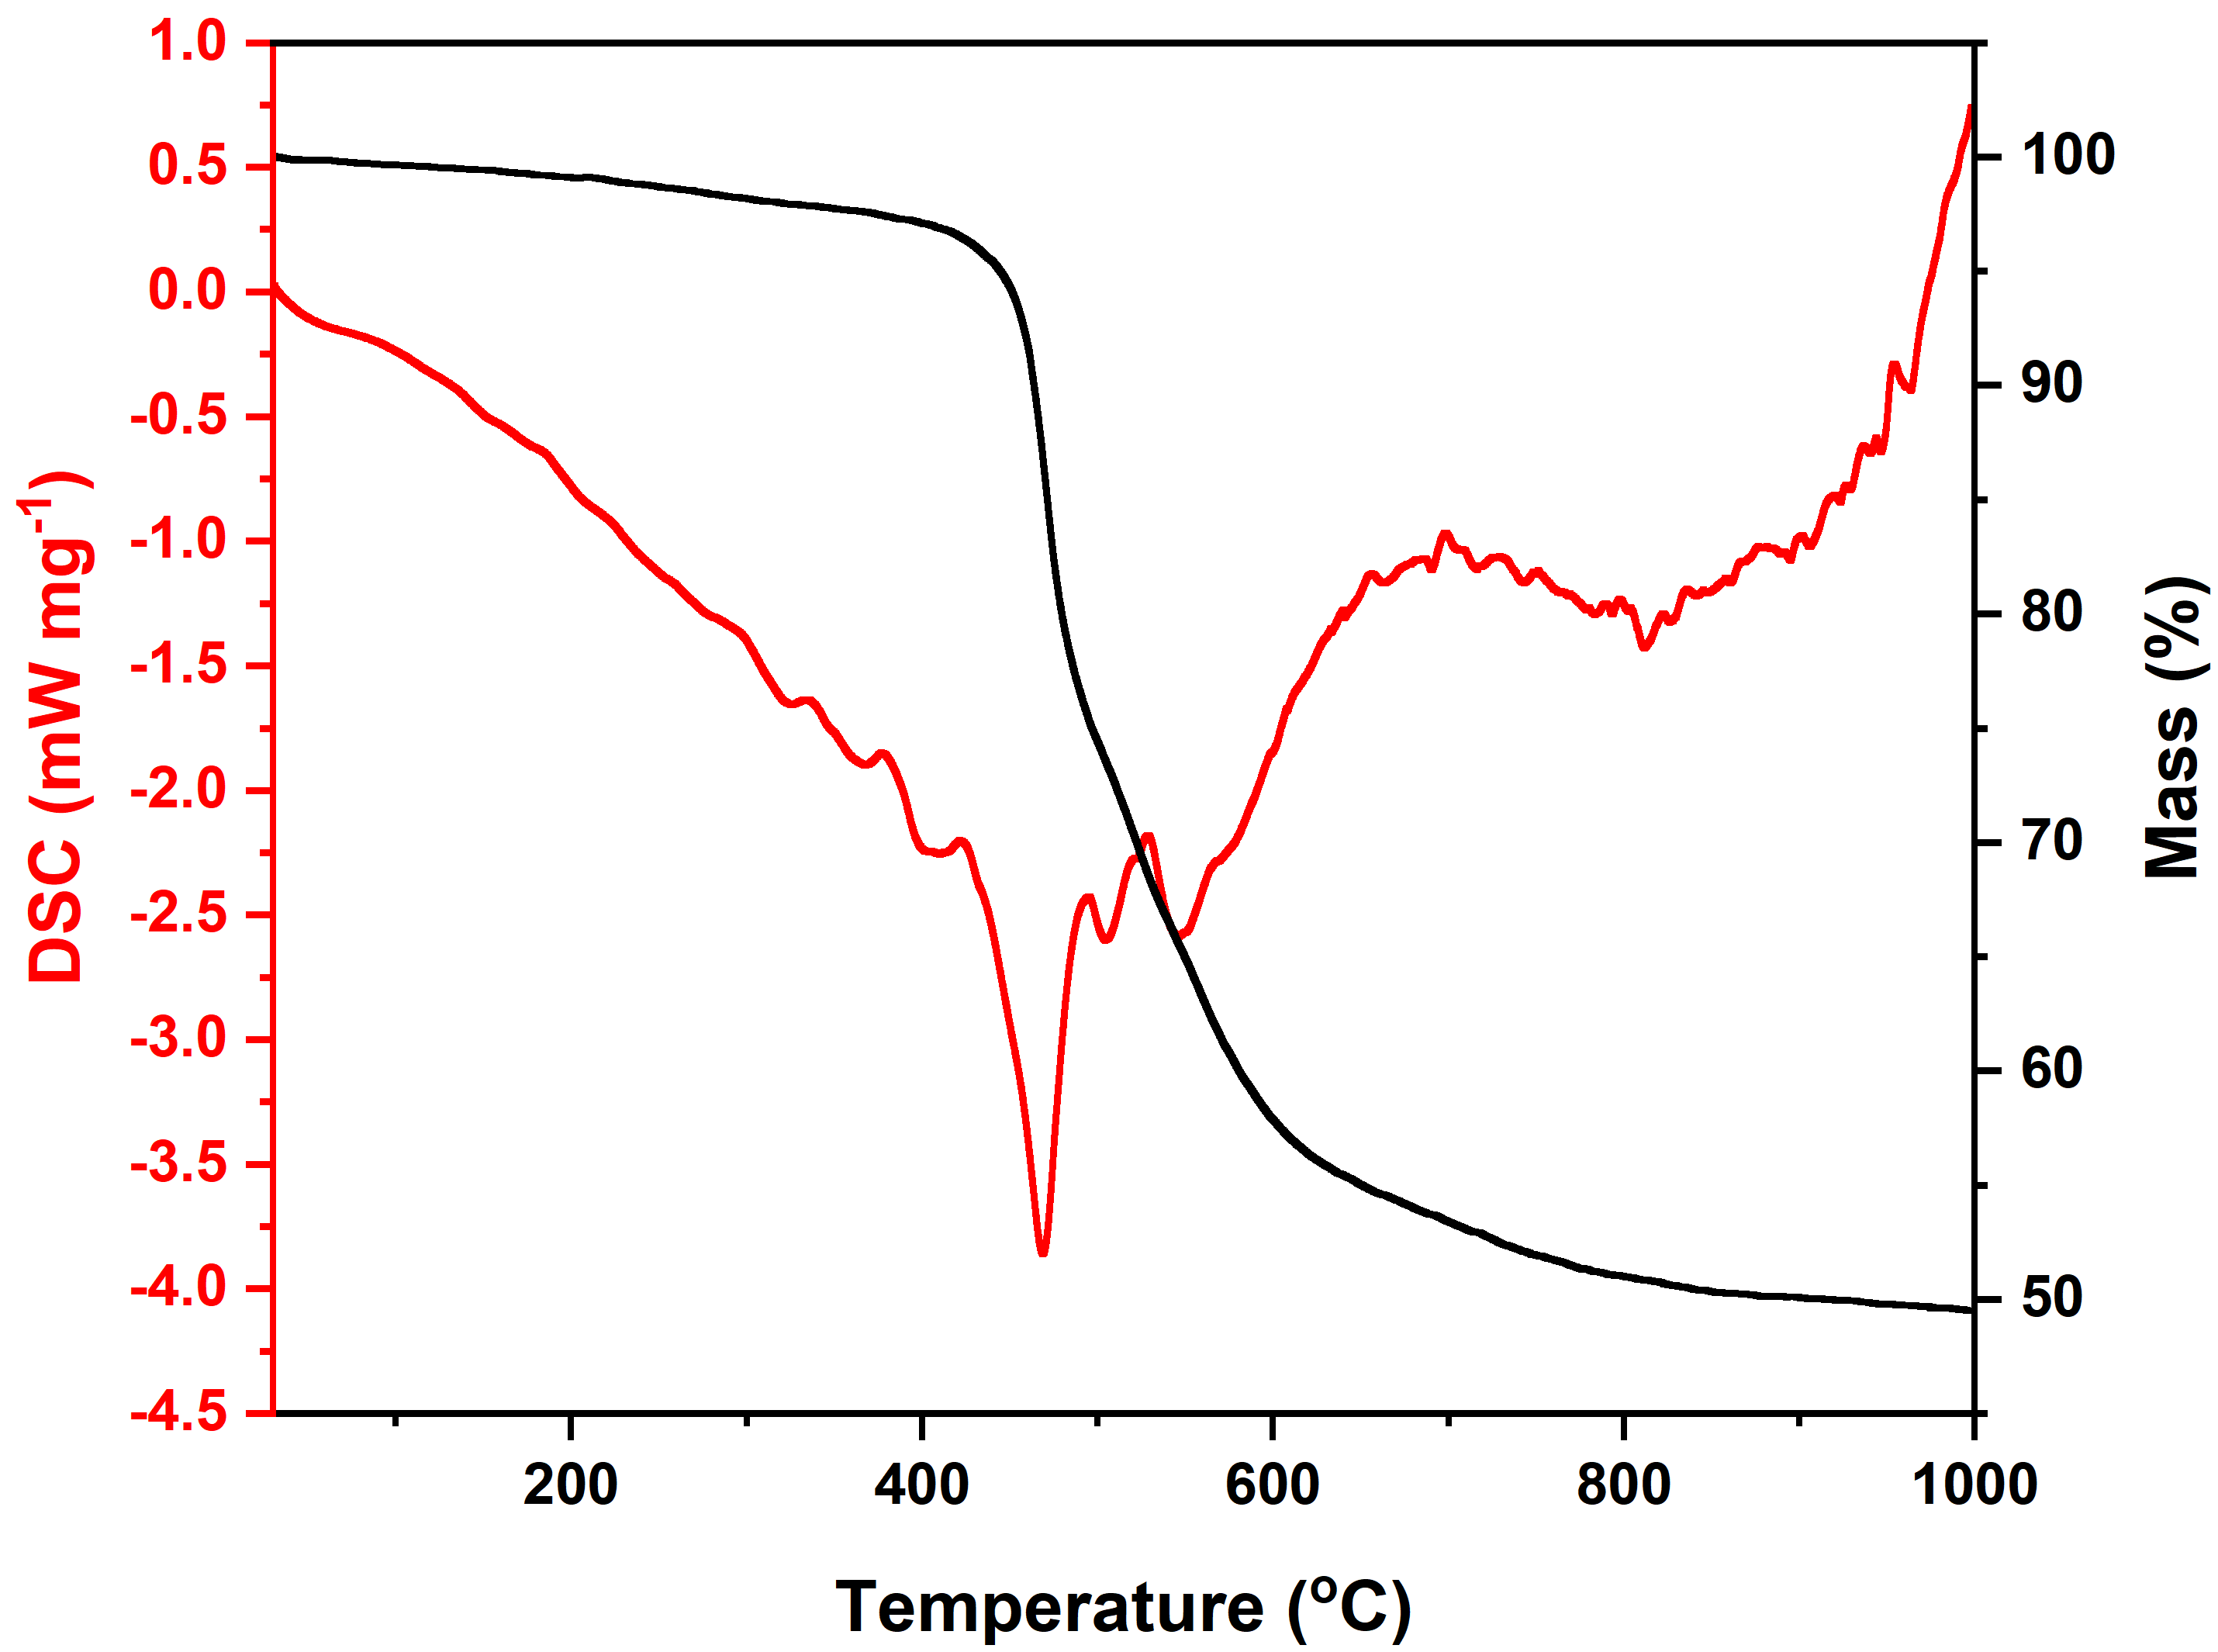


**Figure S6**. TG-DSC profile of FCOF-XJ.

**Stability Test of FCOF-XJ**

In a typical experiment, 50 mg of FCOF-XJ was immersed in 1 M NaOH and 1 M HCl at room temperature for 24 hours to test the stability of FCOF-XJ. The powder was then filtered and washed with tetrahydrofuran and dichloromethane, and then vacuum dried to measure gas adsorption data and FT-IR data.


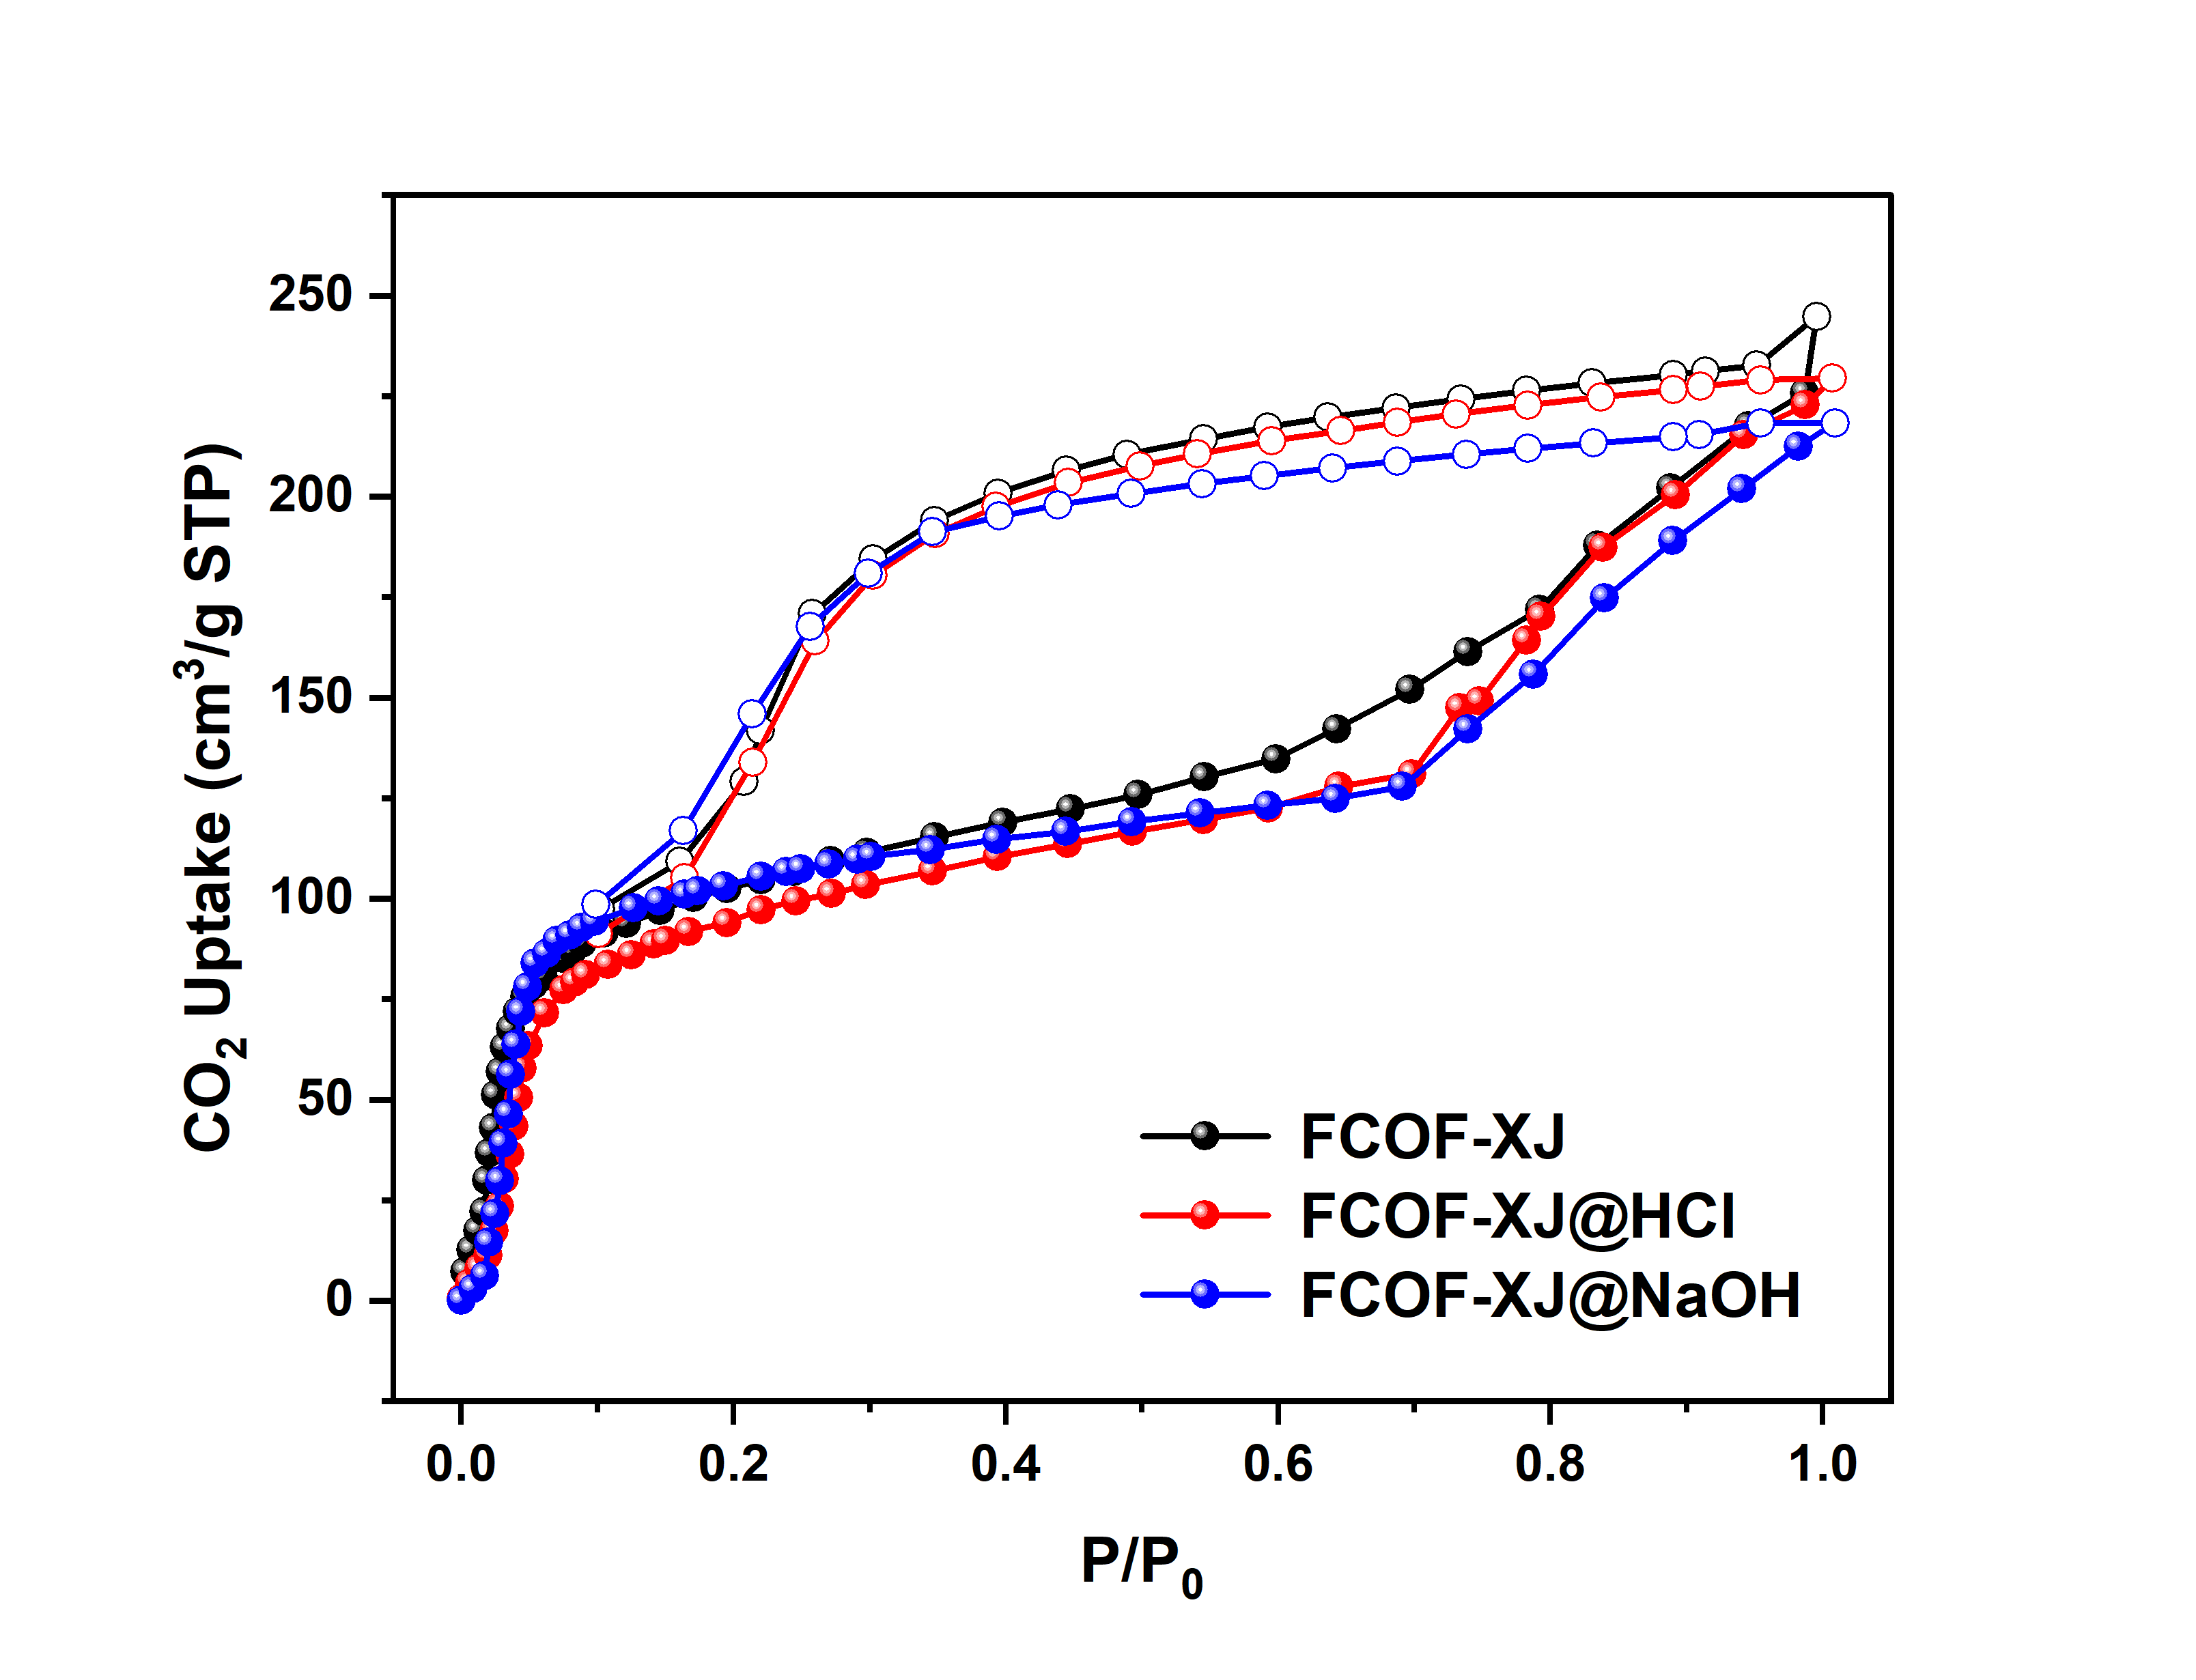


**Figrue S7**. CO2 adsorption-desorption isotherm for FCOF-XJ. Untreated FCOF-XJ: black; FCOF-XJ after immersion in 1 M HCl: red; FCOF-XJ after immersion in 1M NaOH: blue.


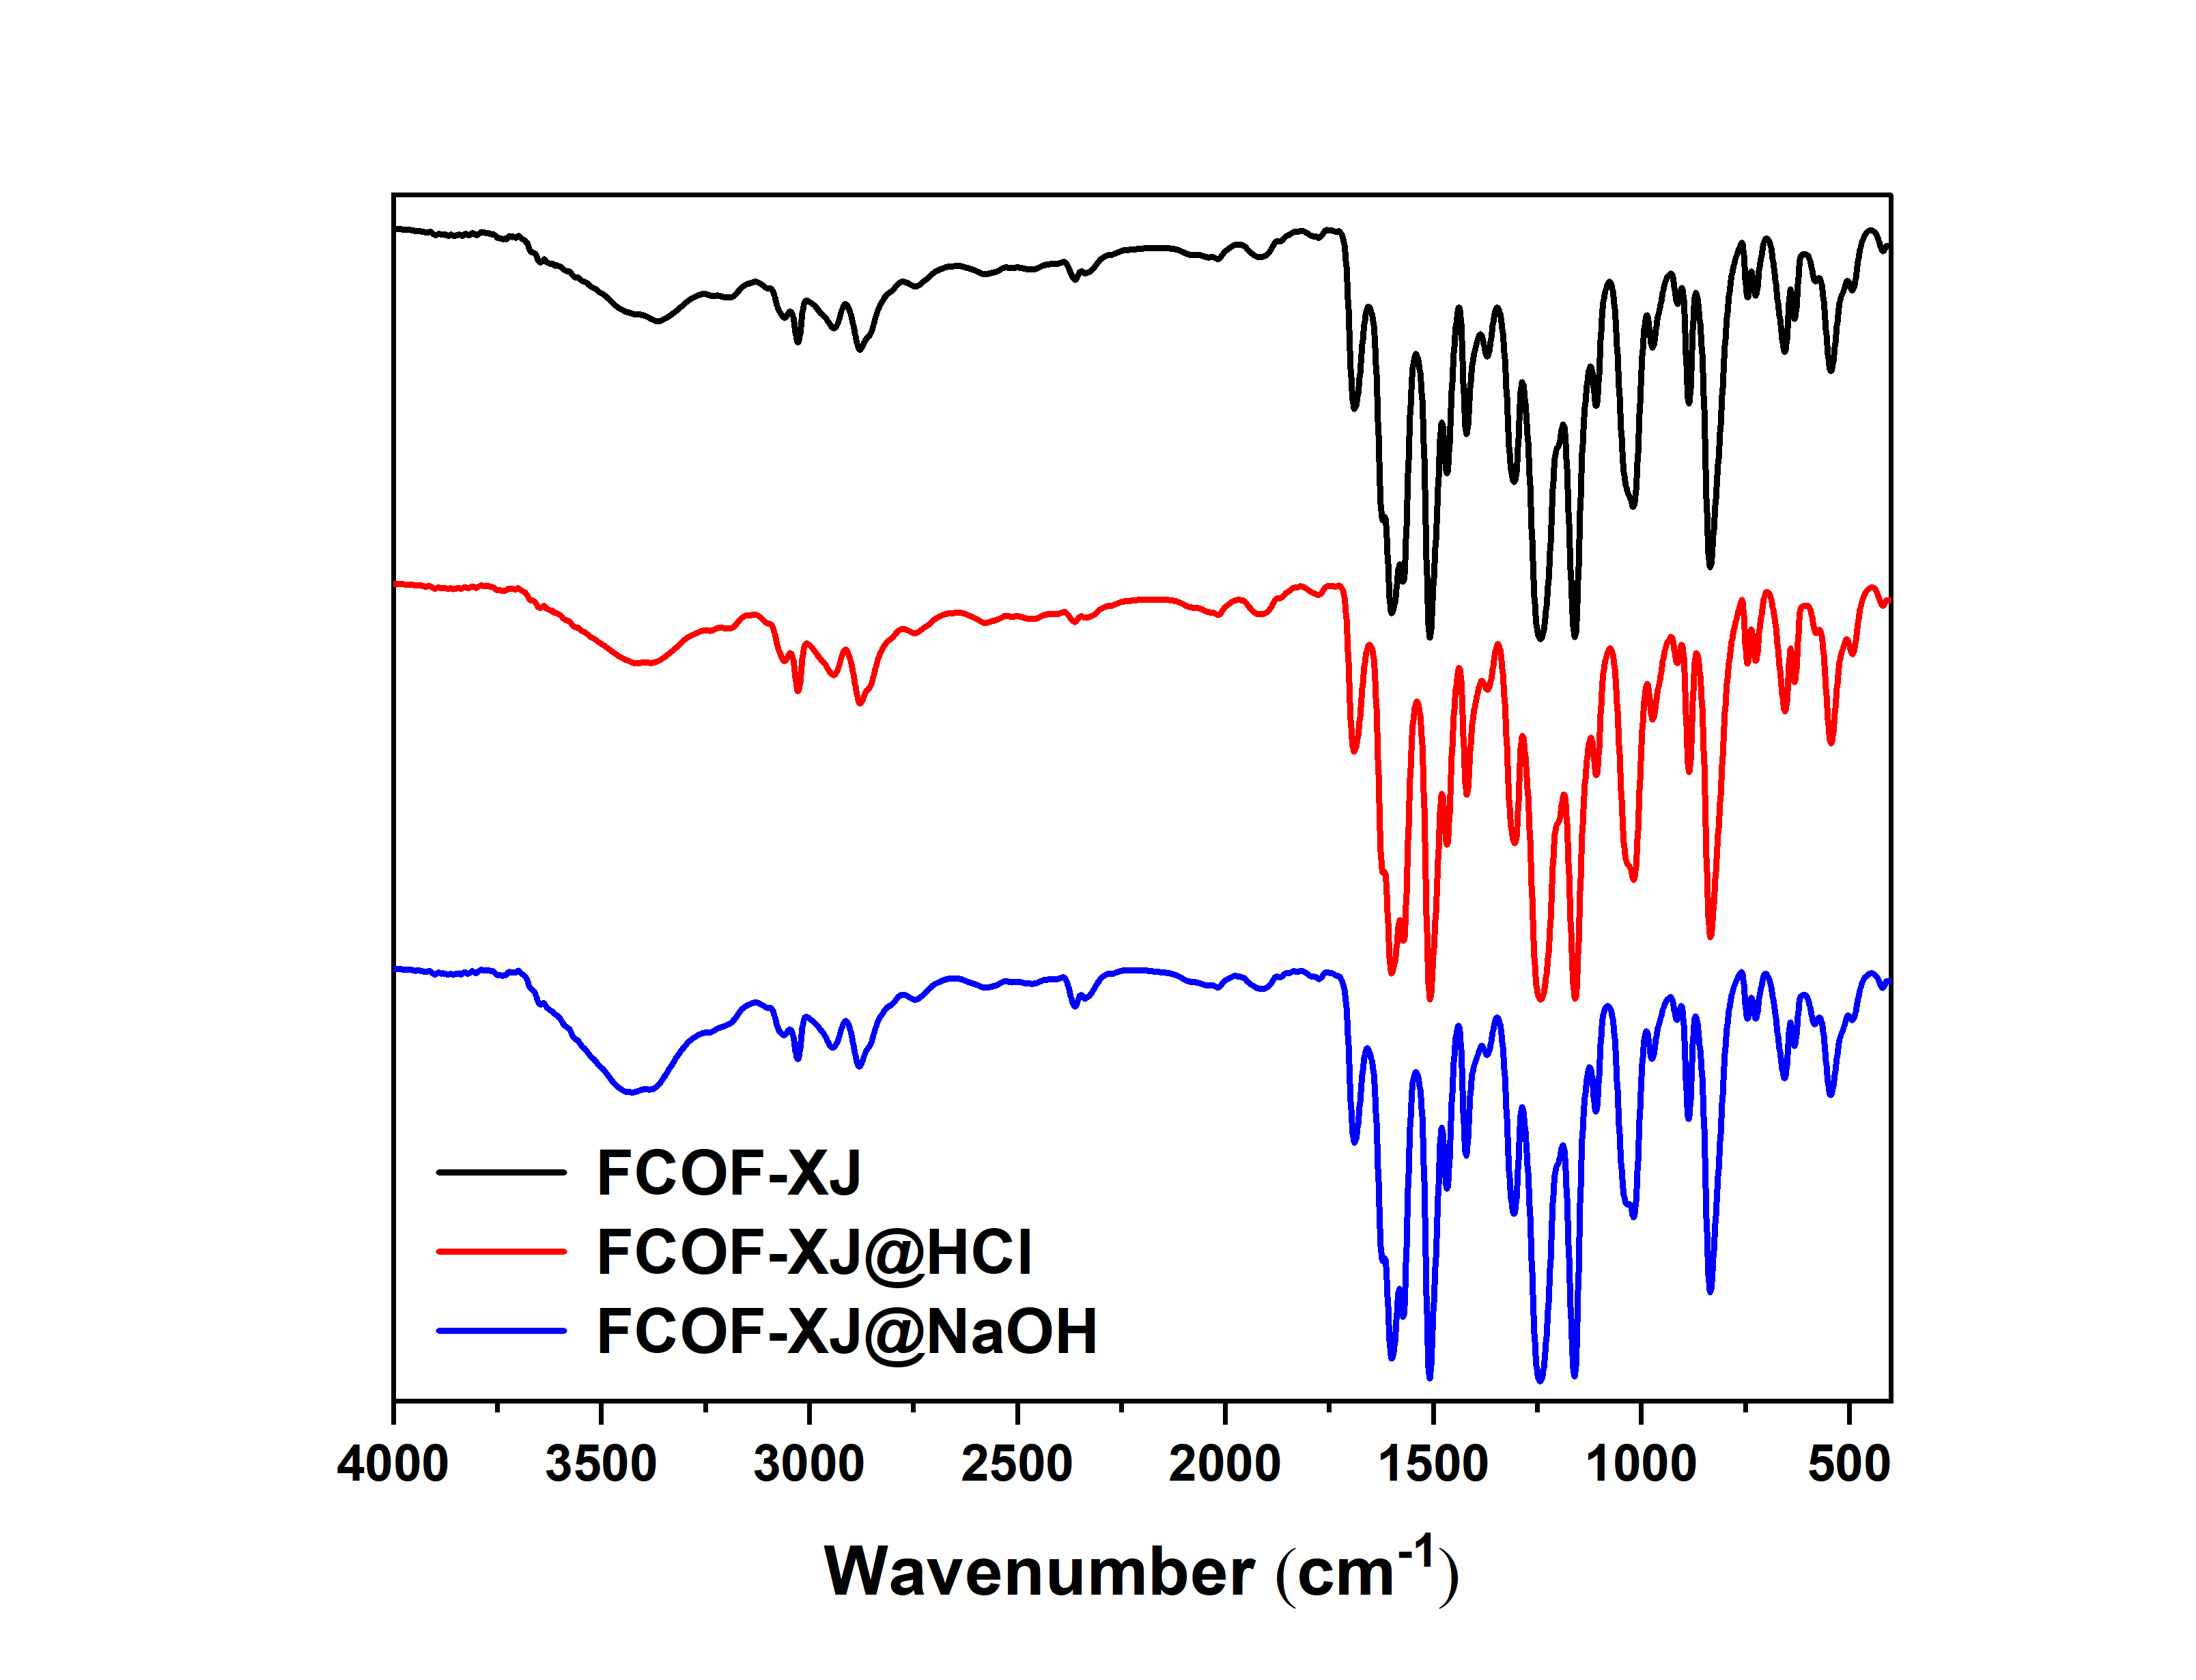


**Figrue S8**. FT-IR profile for FCOF-XJ. Untreated FCOF-XJ: black; FCOF-XJ after immersion in 1 M HCl: red; FCOF-XJ after immersion in 1M NaOH: blue.

# Section 3. Single-component gas adsorption experiment


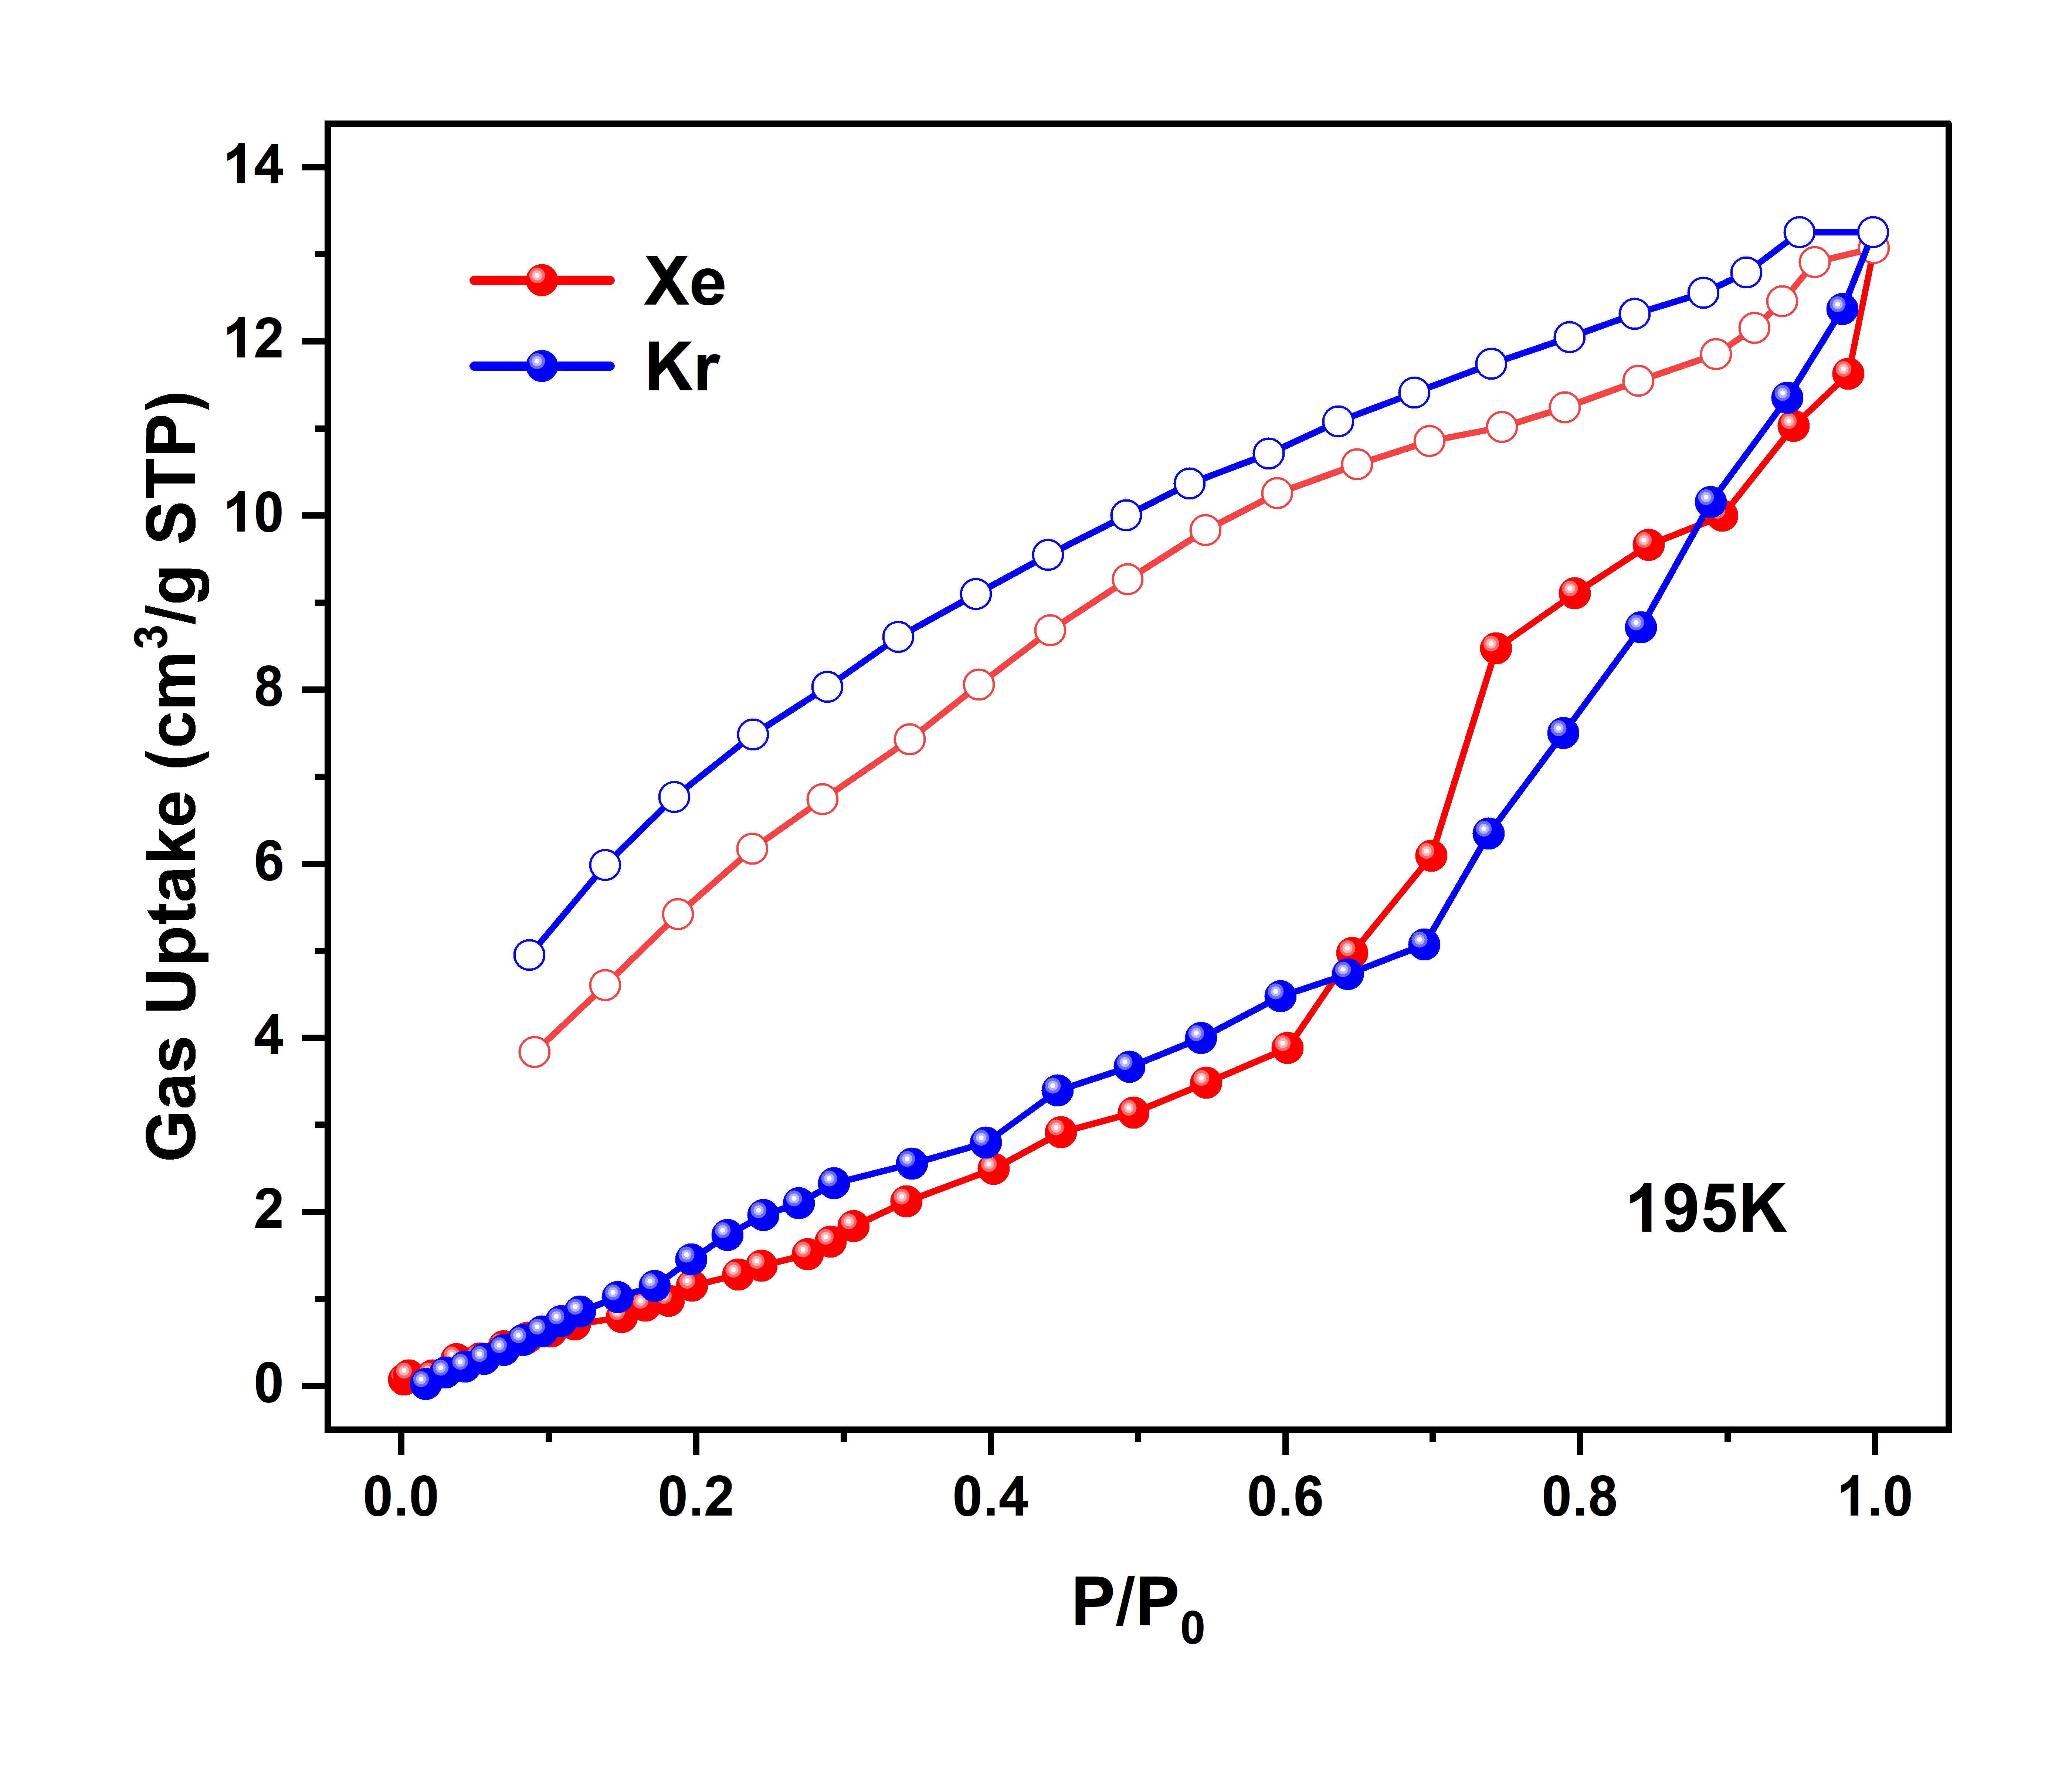


**Figrue S9**. Single-component adsorption isotherms for Xe and Kr at 195 K


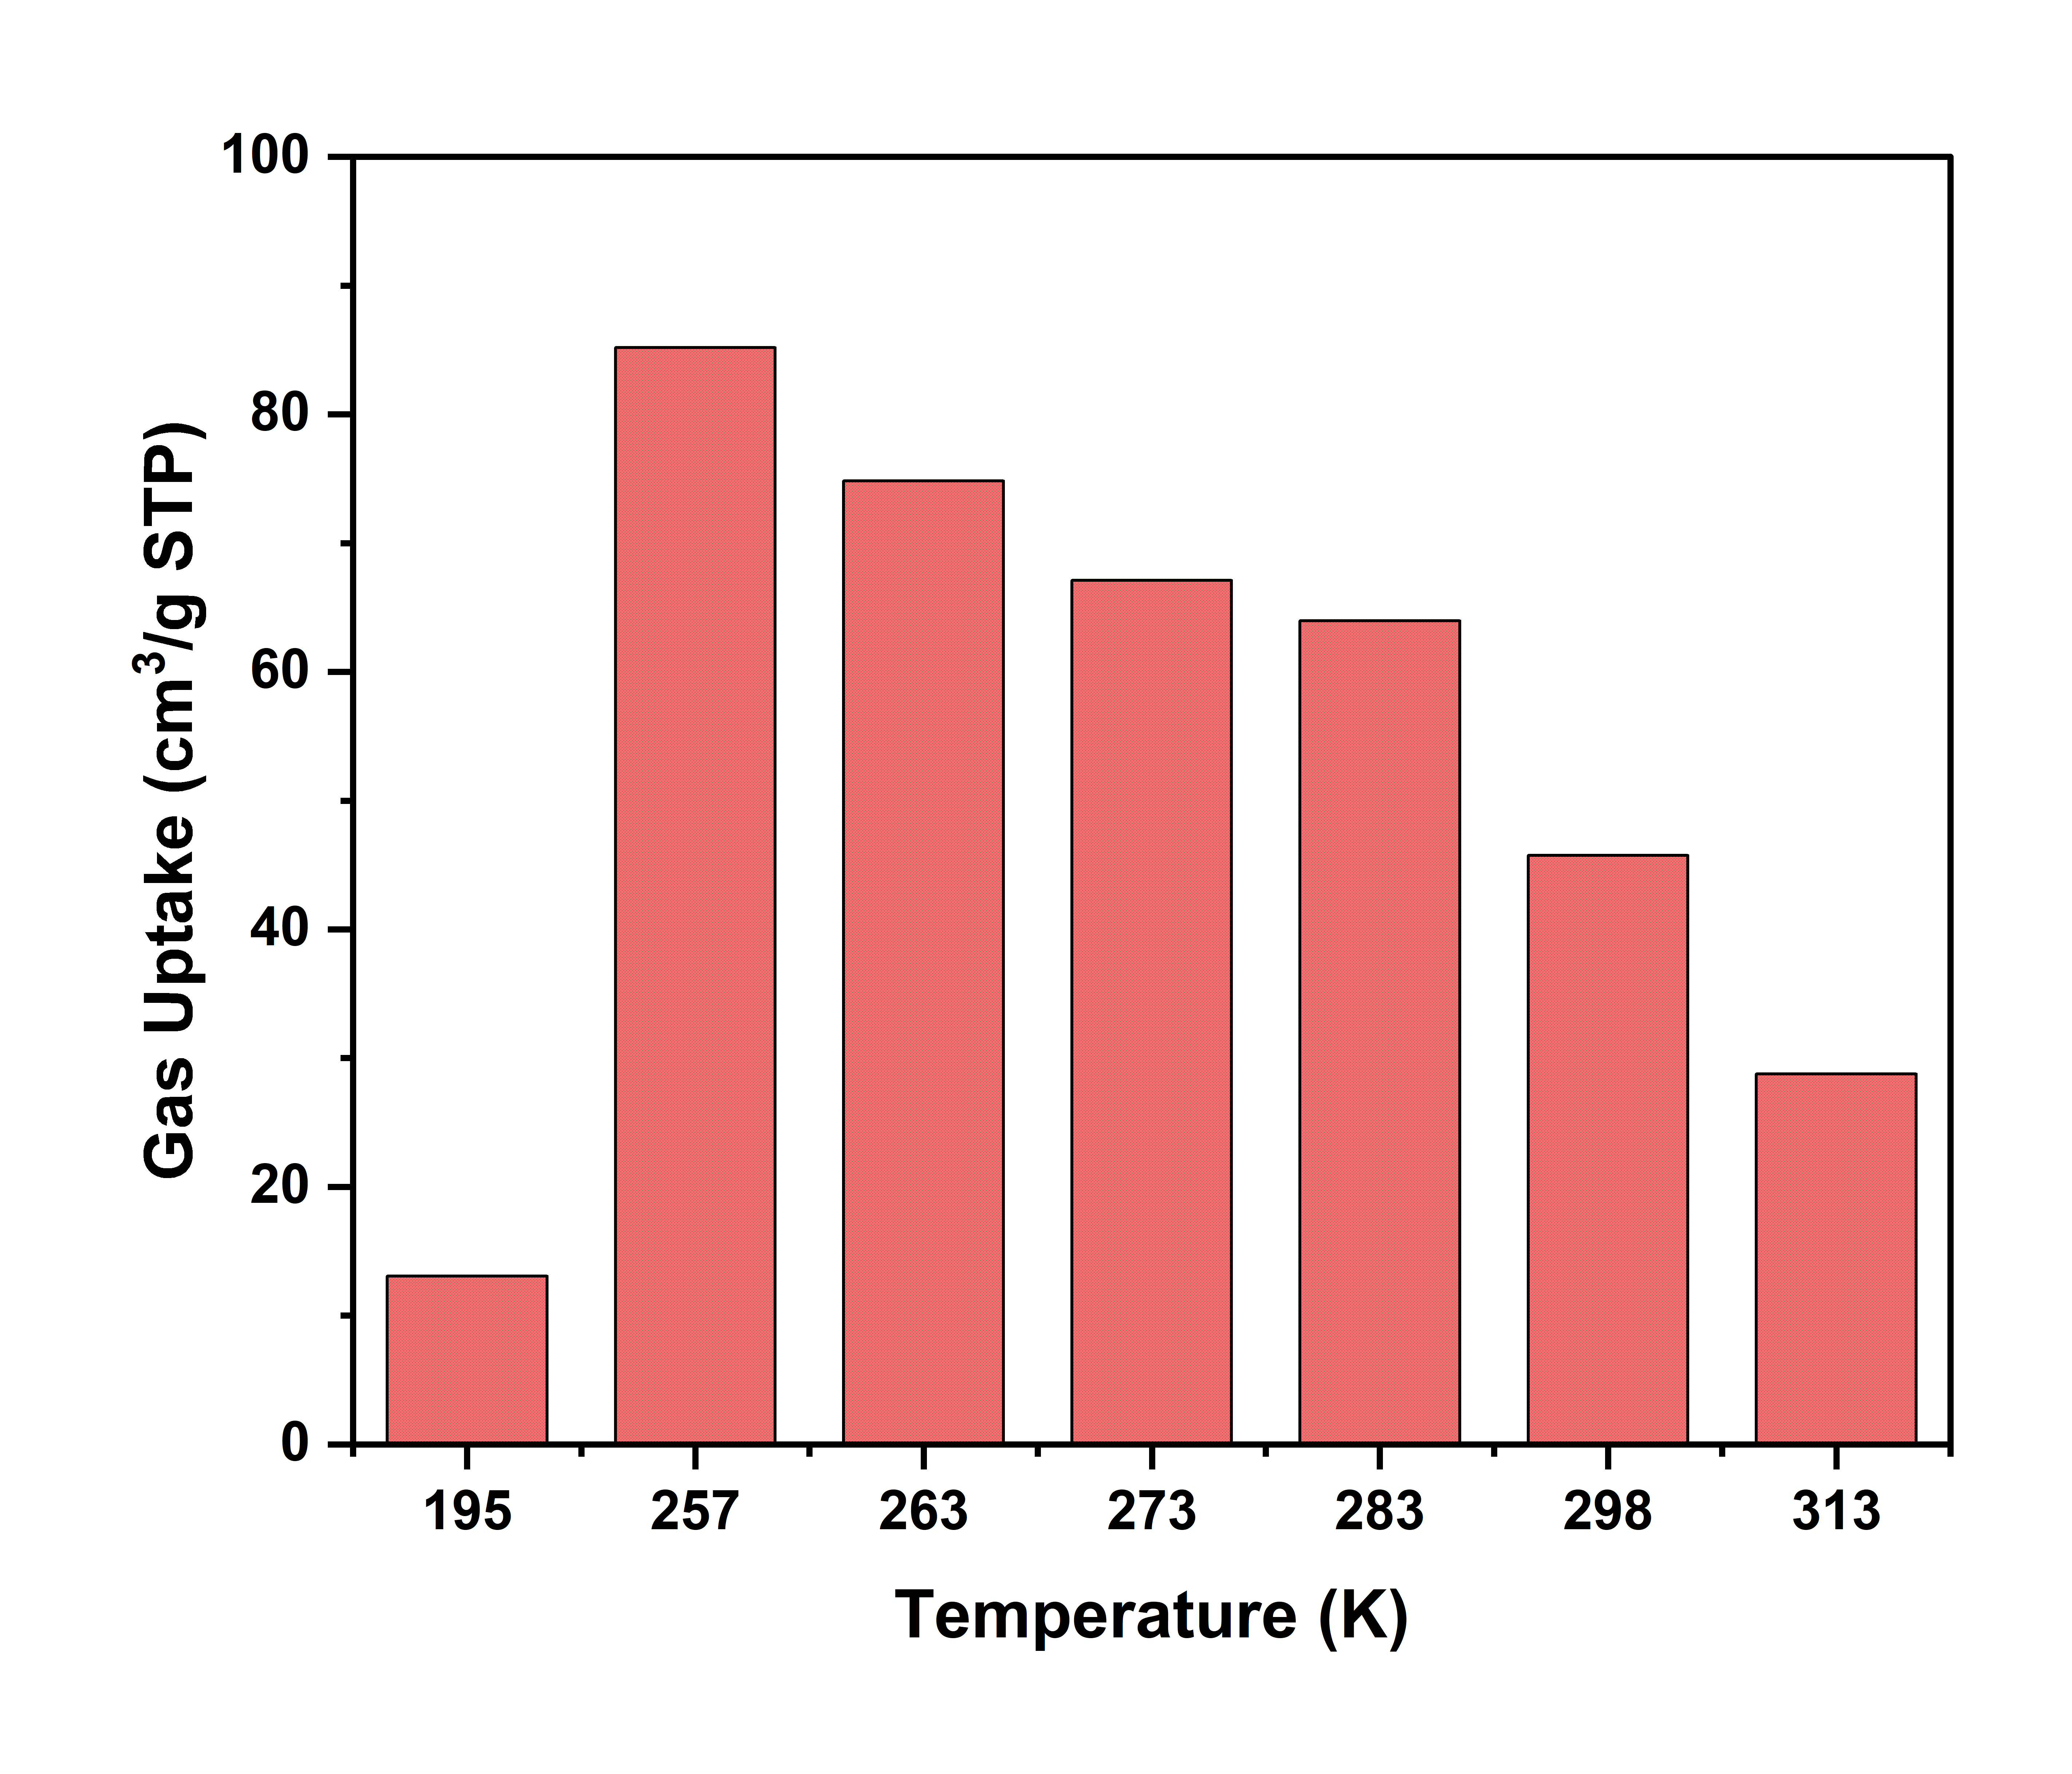


**Figrue S10**. Saturated adsorption capacity of Xe on FCOF-XJ at 195 K-313 K and atmospheric pressure.

# Section 3. Calculation procedures of isoteric adsorption enthalpy

The isosteric enthalpy (Qst) were calculated by the Clausius-Clapeyron equation1:

(1)

The modified dual-site Sips equation (Langmuir-Freundlich equation):

(2)

where *q* is the adsorbed amount per unit mass of pure component (mmol g-1); *P* is the pressure of the native gas at equilibrium (kPa); *q*m,A, *q*m,B, and a (mmol g-1) are the maximum loading capacity of the adsorbent at the adsorption sites A, B, and C; *b*A, *b*B, and *b* (kPa-1) are the affinity parameters of adsorption sites A, B, and C; and *n*A and nB are the solid heterogeneity parameters of adsorption sites A and B. *n*A and *n*B are the solid heterogeneity parameters of adsorption sites A and B.


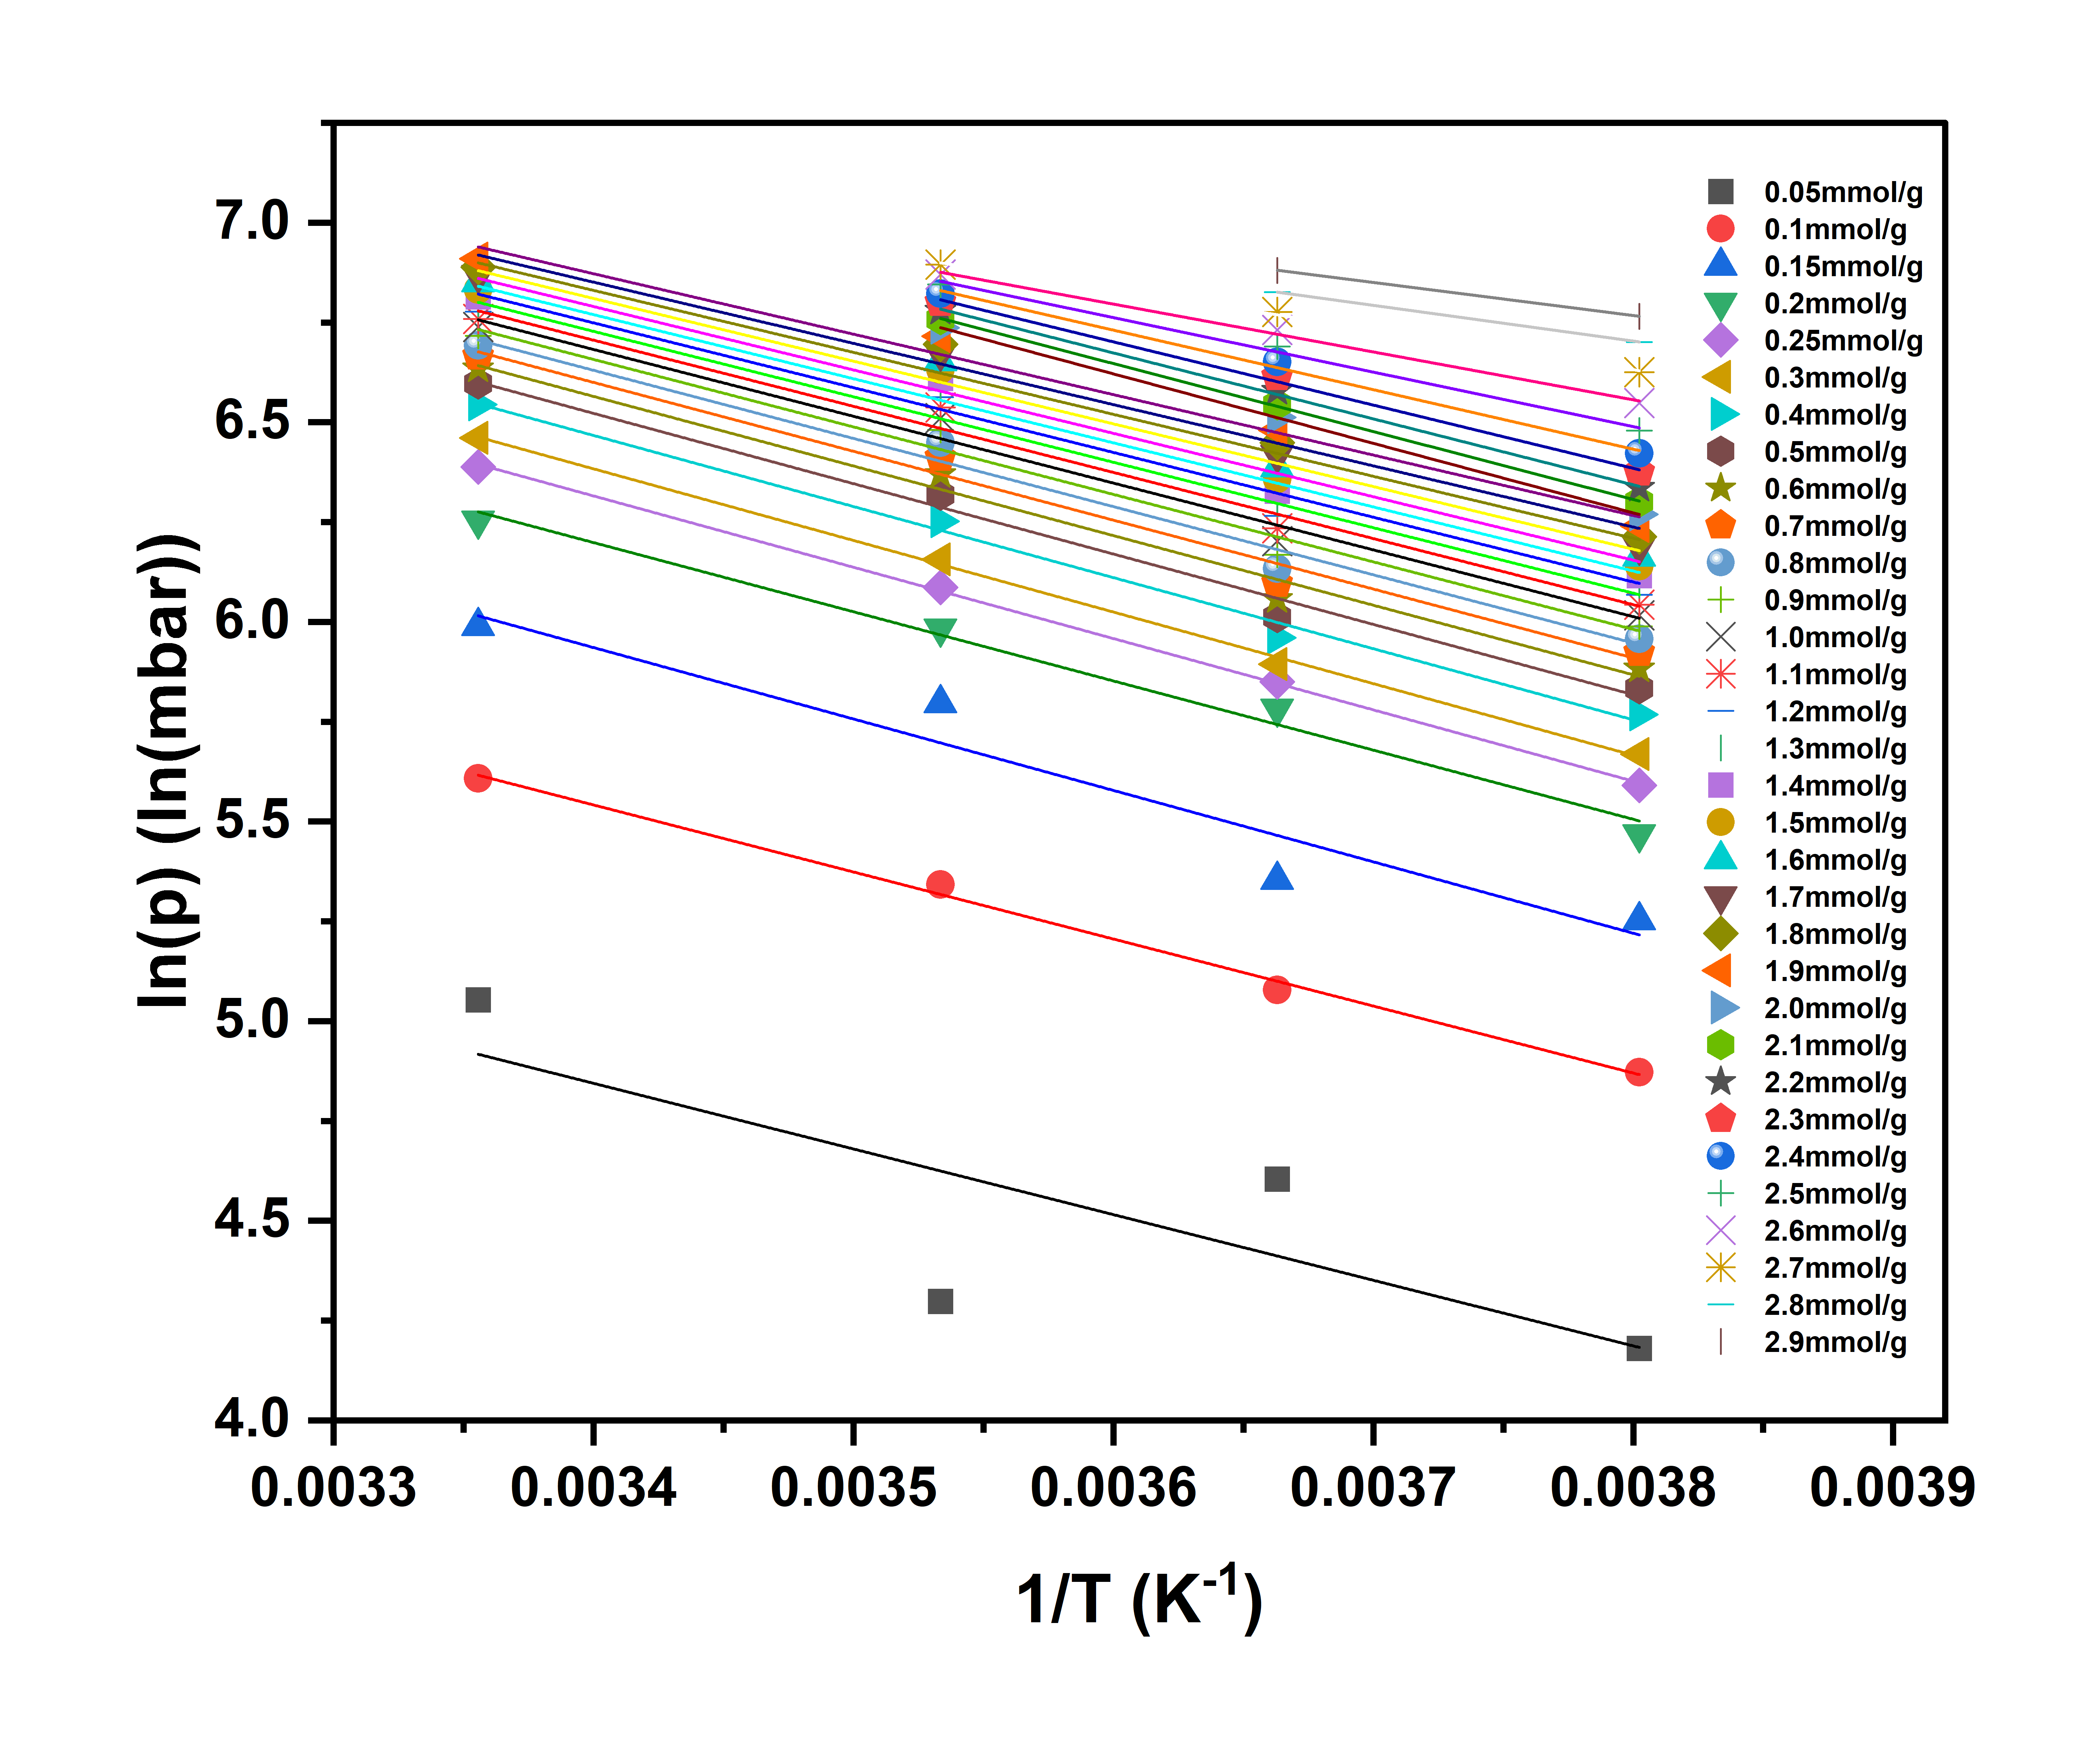


**Figure S11**. Van’t Hoff isochore graphs for Xe adsorption on FCOF-XJ for temperatures 263 K, 273 K, 283 K, 298 K, as a founction of the amount adsorbed ranging from 0.05-2.9 mmol g-1.


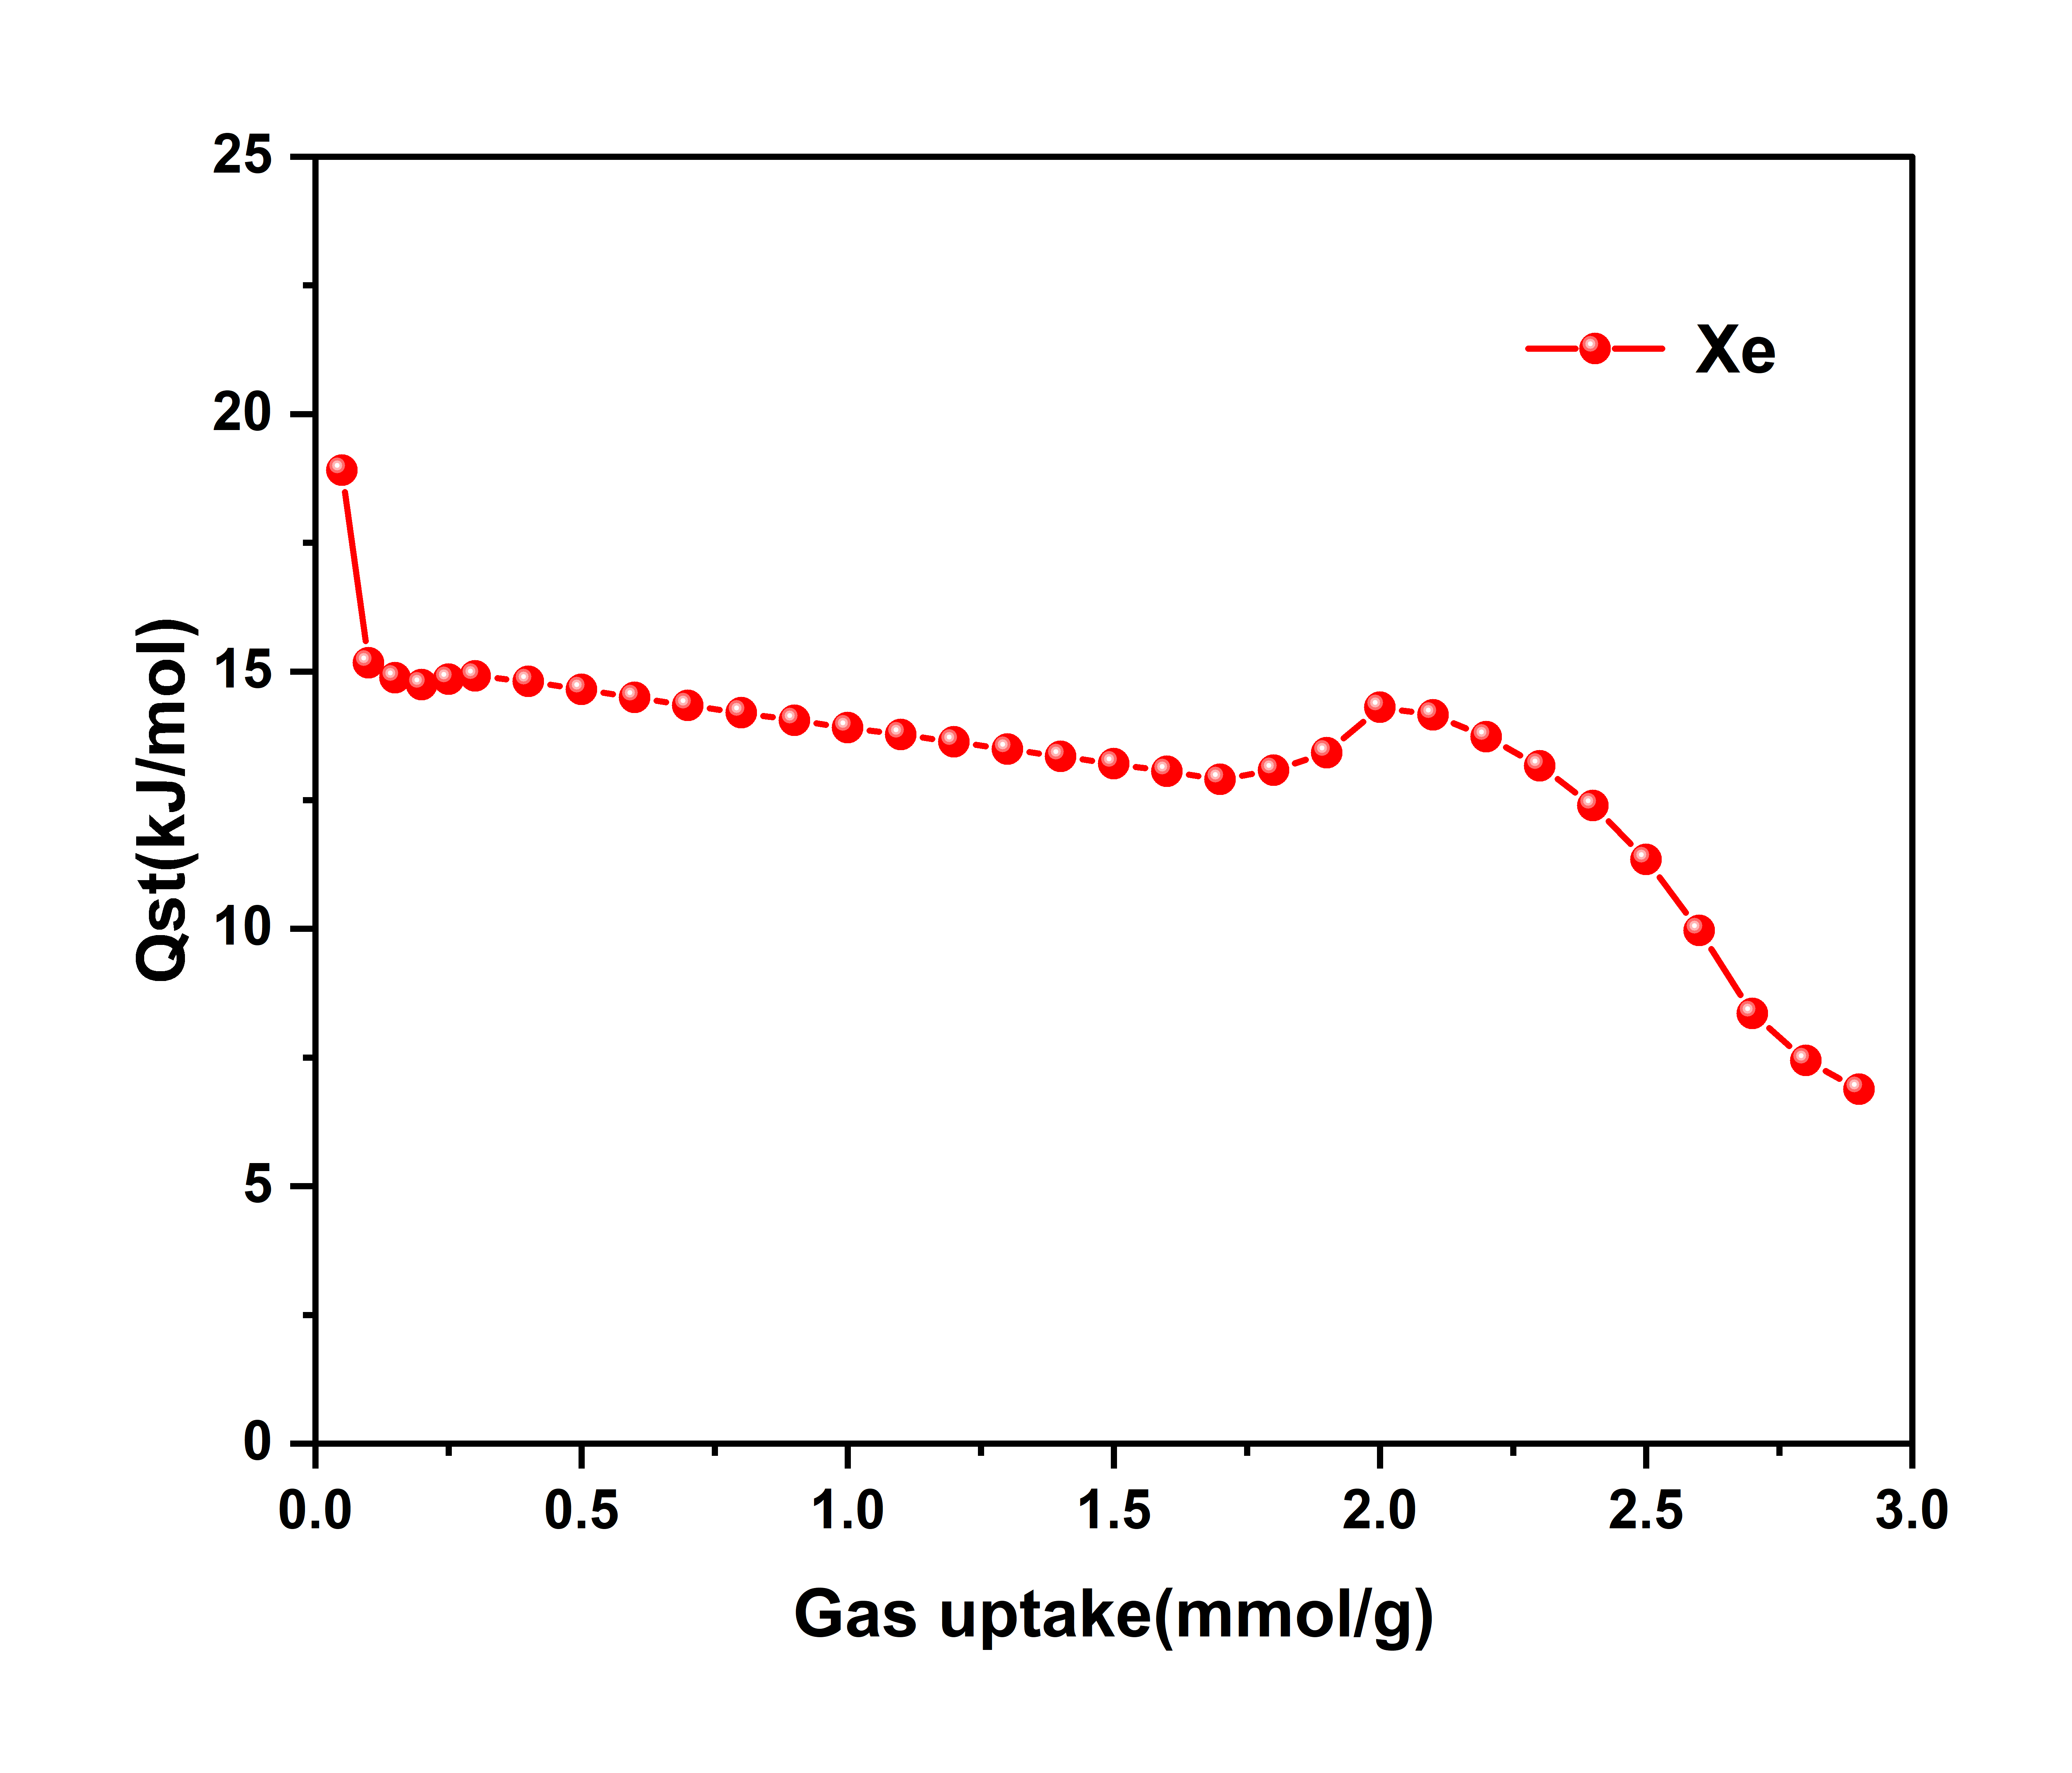


**Figure S12** Isosteric heat (Qst/ kJ mol-1) of adsorption for Xe as a founction of amount adsorbed (mmol g-1) for the temperature range 263-298 K.


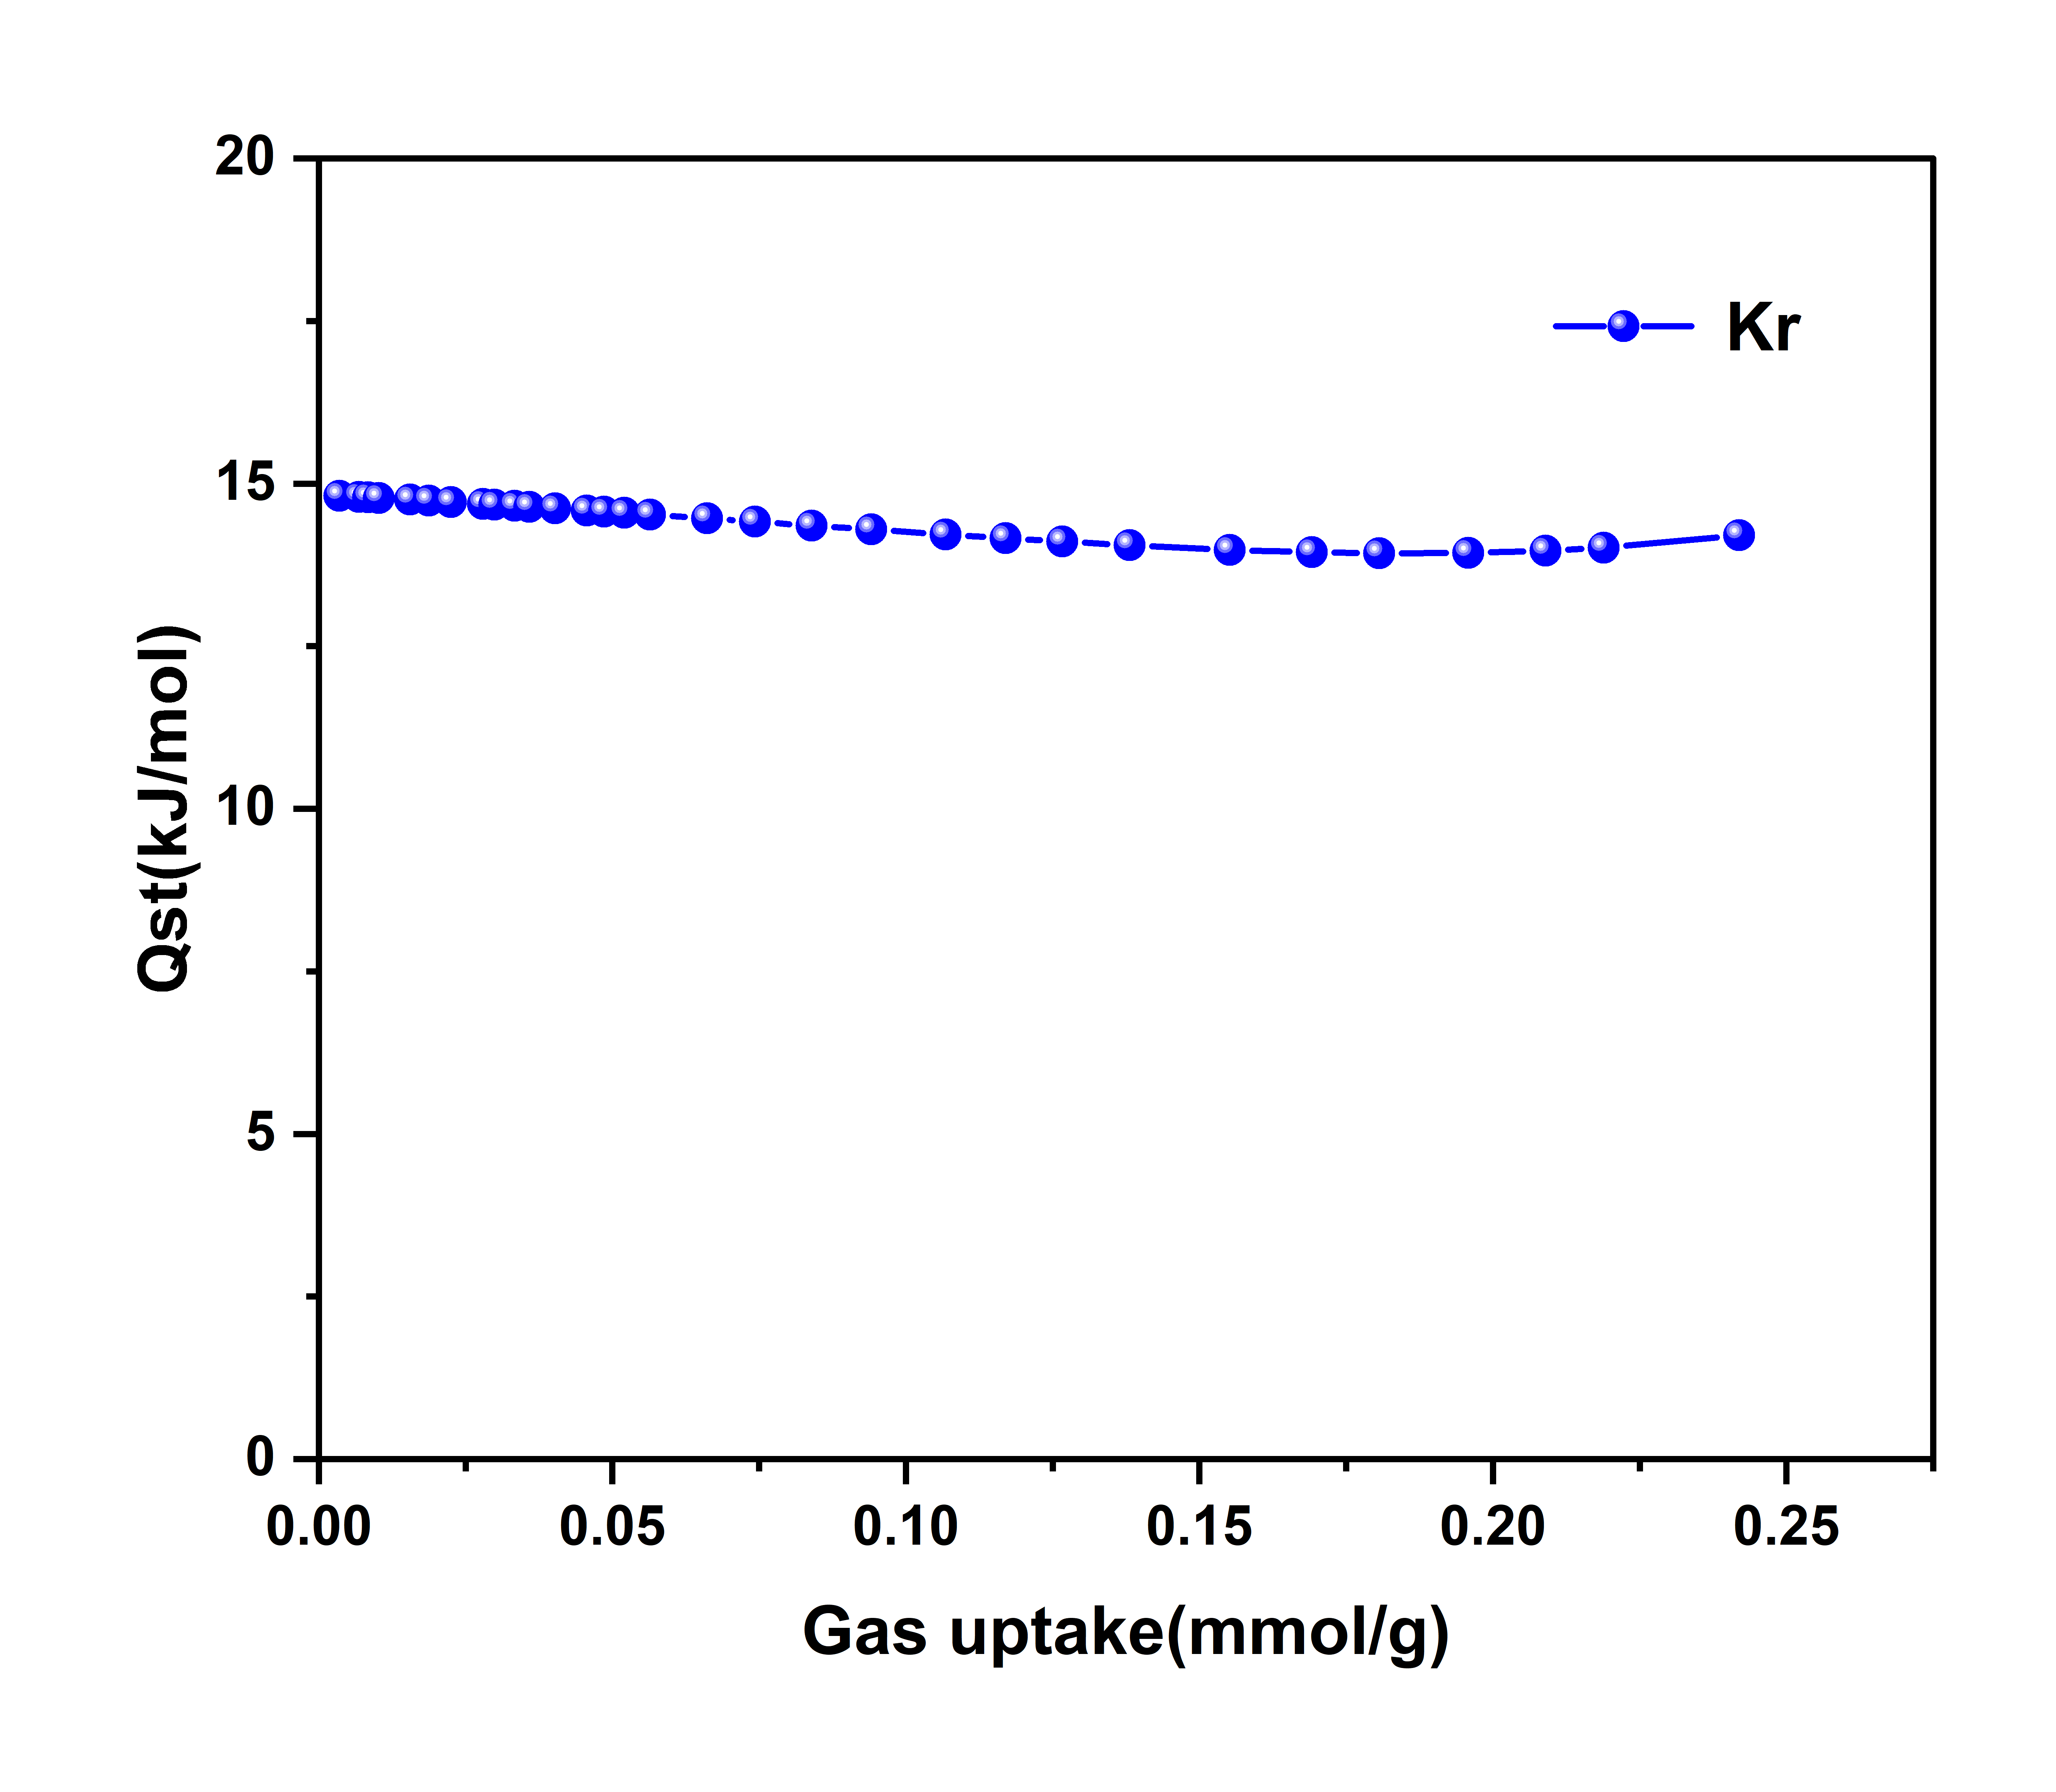


**Figure S13**. The isosteric heat (Qst) with amountadsorbed for Kr.

# Section 4. Calculation of selectivity using S(DIH) equation

The S(DIH) equation based on the difference in equivalent heat (DIH) has been shown to accurately predict the selectivity of two-component gas mixtures at low pressures (1~1 bar). The pressure-dependent selectivity can be calculated using the following equation2:

(3)

(4)

(5)

where *Ni*(p) and *Nj*(p) are the inspirations of the pure component at the pure component at the corresponding partial pressures, respectively. *S*0 is only related to , which is the difference in the strength of the interaction of the material with the two gases.

**
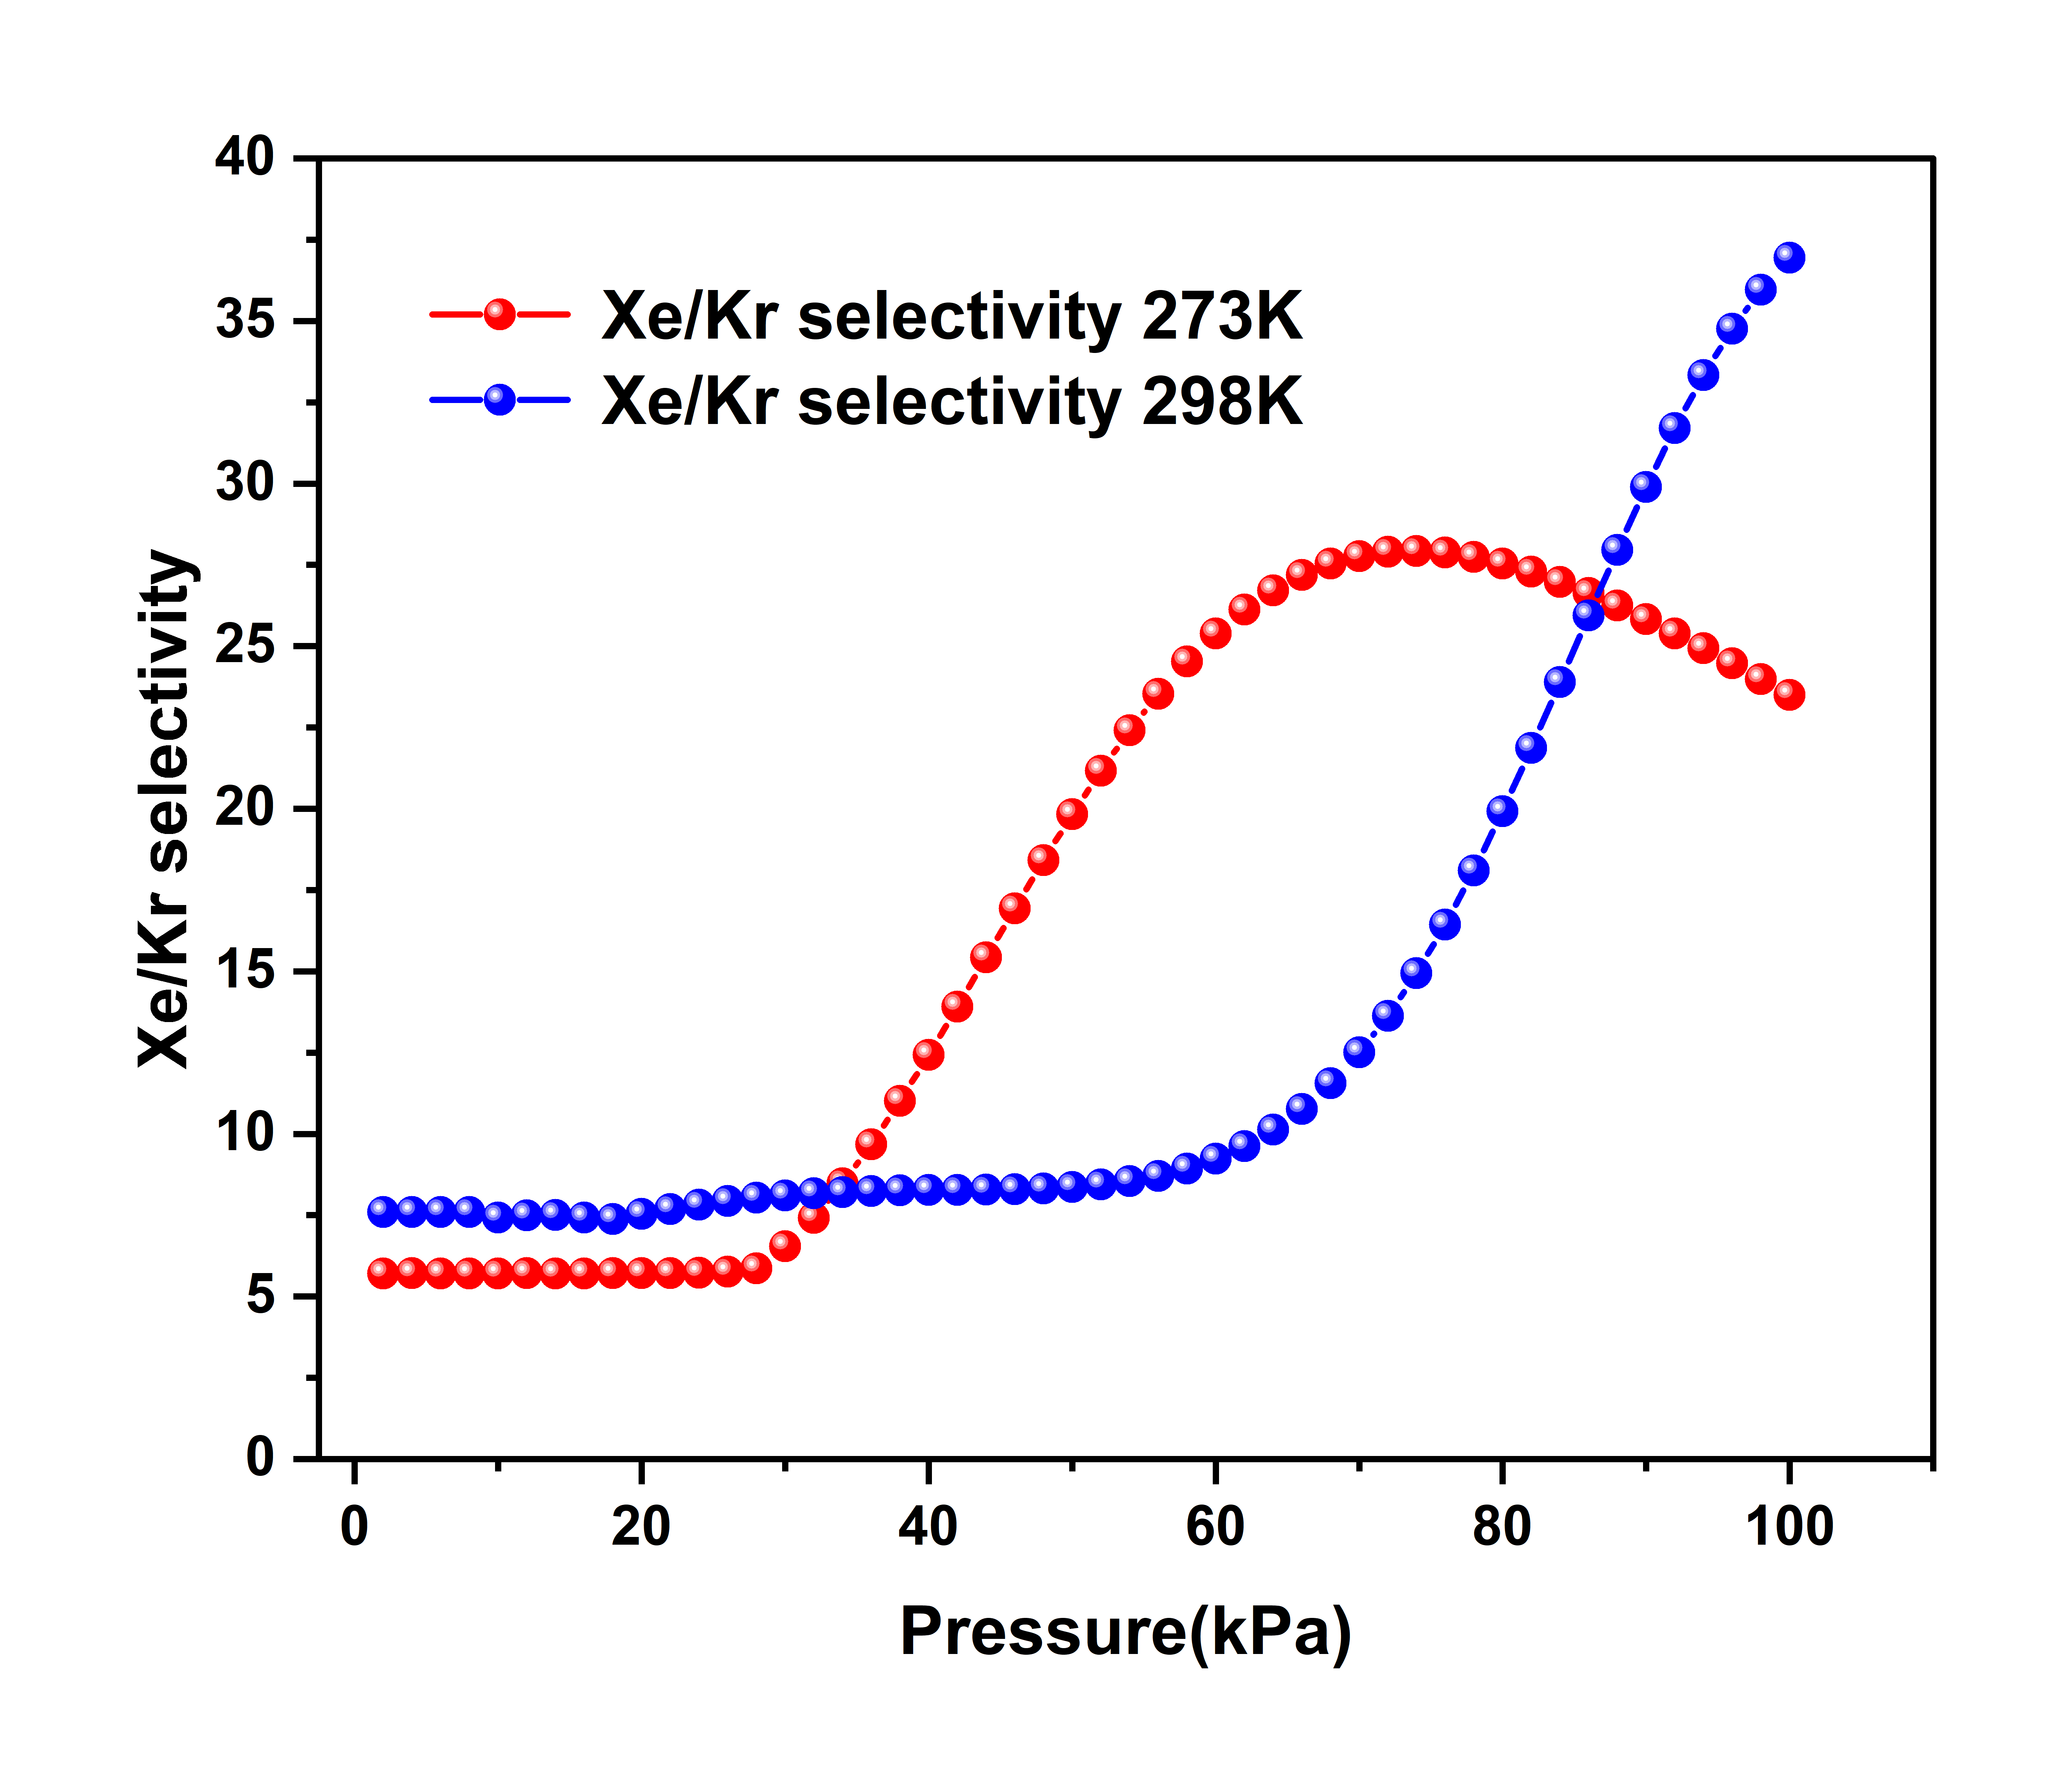
**

**Figure S14**. Xe/Kr selectivity at different temperatures (273 K: red; 298 K: blue).

**Table S1**. Comparison of Xe/Kr adsorption uptake, Qst and IAST selectivity in this work with some other reported porous materials

| Materials | Xe Uptakea  (cm3/g) | Kr Uptakea  (cm3/g) | Xe/Kr selectivity | Material  Type | Ref. |
| --- | --- | --- | --- | --- | --- |
| FCOF-XJ | 45.8 | 2.0 | 36.9b | COF | This work |
| ATFG-COF | 38.5 | 12.1 | ~6c | COF | 3 |
| TFB-TAPA | 34.9 | 10.2 | 8.9d | COF | 4 |
| TFB-TAPA-Bu | 36.7 | 14.4 | 5.7d | COF | 4 |
| TFP-TAPA | 37.5 | 12.0 | 9.8d | COF | 4 |
| TFP-TAPA-Bu | 85.6 | 28.5 | 9.7d | COF | 4 |
| Ppy-POF | 29.6 | 9.4 | 7.6c | POP | 5 |
| POP-ch-ET | 31.1 | 7.2 | 9.8b | POP | 6 |
| POP-ch-ME | 51.5 | 13.0 | 7.8b | POP | 6 |
| POP-ch-SP | 53.1 | 15.0 | 11.5b | POP | 6 |
| COP-14 | 53.8 | ~11.2 | ~6b | POP | 7 |
| IISERP-POF6 | 37.6 | ~9.9 | 6.7c | POP | 8 |
| IISERP-POF7 | 34.5 | ~12.1 | 6.3c | POP | 8 |
| IISERP-POF8 | 38.5 | ~11.0 | 6.3c | POP | 8 |
| CMP-PY-TBTP | 38.1 | ~12.1 | 11.9c | POP | 9 |
| CTF-0 | 25.2 | 8.4 | 5.2d | POF | 10 |
| PAF-45 | 49.6 | 24.2 | 8.1d | POF | 10 |
| PAF-67 | 62.8 | 37.3 | 6.6d | POF | 10 |
| PAF-45S | 41.5 | 12.2 | 16.7d | POF | 11 |
| QS-PAF-1 | 40.3 | ~11.2 | 9.7d | PAF | 12 |
| QS-PAF-2 | 39.2 | ~11.2 | 9.7d | PAF | 12 |
| PAF-4F | 50.6 | 12.5 | 4.2c | PAF | 13 |
| PAF-8F | 39.0 | 9.4 | 3.1c | PAF | 13 |
| HOF-FJU-168 | 78.3 | 29.9 | 22.0c | HOF | 14 |
| HOF-FJU-46 | 56.2 | ~24.8 | 19.9c | HOF | 15 |
| HOF-FJU-8 | 40.5 | 17.2 | 12.1c | HOF | 16 |
| HOF-BTB | 45.0 | 9.4 | 6.1c | HOF | 17 |
| HOF-40 | 34.9 | 9.9 | 11.2c | HOF | 18 |
| HIAM-103 | 31.1 | 14.6 | 8.3c | HOF | 19 |
| ETTA-Cl | 32.0 | 15.2 | 9.7c | HOF | 20 |
| ETTA-Br | 30.5 | 14.3 | 10.5c | HOF | 20 |
| HOF-ZJU-201 | 67.4 | ~34.7 | 21.0c | SMOF | 21 |
| HOF-ZJU-202 | 63.2 | ~38.1 | 15.1c | SMOF | 21 |
| MOF-Cu-H | 71.5 | ~35.8 | 16.7c | MOF | 22 |
| ZUL-C1 | ~64.7 | ~24.6 | 11.7c | MOF | 23 |
| ZUL-C2 | ~58.2 | ~29.1 | 19.1c | MOF | 23 |
| ZJU-74a-Ni | 73.7 | 30.9 | 74.1c | MOF | 24 |
| ZJU-74a-Pd | 62.9 | 23.5 | 103.4c | MOF | 24 |
| Co-squarate | 29.1 | ~13.6 | 69.7c | MOF | 25 |
| Ni(4-DPDS)2CrO4 | 36.1 | ·20.2 | 23.7c | MOF | 26 |
| Ni(4-DPDS)2MoO4 | 24.0 | ~14.6 | 20.3c | MOF | 26 |
| Ni(4-DPDS)2WO4 | 24.9 | 13.9 | 30.2c | MOF | 26 |
| ZUL-530 | 70.1 | 32.0 | 20.5c | MOF | 27 |

(a) At RT and 1 Bar; (b) From S(DIH) calculation; (c) From ISAT calculation; (d) From Henry calculation.

# Section 5. Crystal structure of FCOF-XJ

**Table S2**. Fractional atomic coordinates and the unit cell of FCOF-XJ-CP.

| FCOF-XJ-CP | | Space group: I-4  a = 16.279(1) Å, b = 16.279(1) Å, c =9.148(2) Å, α = β= γ = 90o | | |
| --- | --- | --- | --- | --- |
| C1 | C | 6.86485 | 8.57643 | 8.19212 |
| C2 | C | 8.57643 | 9.41415 | 0.95608 |
| C3 | C | 9.41415 | 7.70257 | 8.19212 |
| C4 | C | 7.70257 | 6.86485 | 0.95608 |
| C5 | C | 15.00435 | 0.43693 | 3.61802 |
| C6 | C | 0.43693 | 1.27465 | 5.53018 |
| C7 | C | 1.27465 | 15.84207 | 3.61802 |
| C8 | C | 15.84207 | 15.00435 | 5.53018 |
| O9 | O | 6.16535 | 7.31464 | 7.77432 |
| O10 | O | 7.31464 | 10.11365 | 1.37388 |
| O11 | O | 10.11365 | 8.96436 | 7.77432 |
| O12 | O | 8.96436 | 6.16535 | 1.37388 |
| O13 | O | 14.30485 | 15.45414 | 3.20022 |
| O14 | O | 15.45414 | 1.97415 | 5.94798 |
| O15 | O | 1.97415 | 0.82486 | 3.20022 |
| O16 | O | 0.82486 | 14.30485 | 5.94798 |
| C17 | C | 5.55798 | 7.13883 | 6.55231 |
| C18 | C | 7.13883 | 10.72102 | 2.59589 |
| C19 | C | 10.72102 | 9.14017 | 6.55231 |
| C20 | C | 9.14017 | 5.55798 | 2.59589 |
| C21 | C | 13.69748 | 15.27833 | 1.97821 |
| C22 | C | 15.27833 | 2.58152 | 7.16999 |
| C23 | C | 2.58152 | 1.00067 | 1.97821 |
| C24 | C | 1.00067 | 13.69748 | 7.16999 |
| C25 | C | 5.63888 | 8.13266 | 5.58946 |
| C26 | C | 8.13266 | 10.64012 | 3.55874 |
| C27 | C | 10.64012 | 8.14634 | 5.58946 |
| C28 | C | 8.14634 | 5.63888 | 3.55874 |
| C29 | C | 13.77838 | 16.27216 | 1.01536 |
| C30 | C | 16.27216 | 2.50062 | 8.13284 |
| C31 | C | 2.50062 | 0.00684 | 1.01536 |
| C32 | C | 0.00684 | 13.77838 | 8.13284 |
| C33 | C | 4.87686 | 5.89951 | 6.31354 |
| C34 | C | 5.89951 | 11.40214 | 2.83466 |
| C35 | C | 11.40214 | 10.37949 | 6.31354 |
| C36 | C | 10.37949 | 4.87686 | 2.83466 |
| C37 | C | 13.01636 | 14.03901 | 1.73944 |
| C38 | C | 14.03901 | 3.26264 | 7.40876 |
| C39 | C | 3.26264 | 2.23999 | 1.73944 |
| C40 | C | 2.23999 | 13.01636 | 7.40876 |
| C41 | C | 5.06472 | 7.86097 | 4.39534 |
| C42 | C | 7.86097 | 11.21428 | 4.75286 |
| C43 | C | 11.21428 | 8.41803 | 4.39534 |
| C44 | C | 8.41803 | 5.06472 | 4.75286 |
| C45 | C | 13.20422 | 16.00047 | 8.96944 |
| C46 | C | 16.00047 | 3.07478 | 0.17876 |
| C47 | C | 3.07478 | 0.27853 | 8.96944 |
| C48 | C | 0.27853 | 13.20422 | 0.17876 |
| C49 | C | 4.31328 | 5.63221 | 5.11494 |
| C50 | C | 5.63221 | 11.96572 | 4.03326 |
| C51 | C | 11.96572 | 10.64679 | 5.11494 |
| C52 | C | 10.64679 | 4.31328 | 4.03326 |
| C53 | C | 12.45278 | 13.77171 | 0.54084 |
| C54 | C | 13.77171 | 3.82622 | 8.60736 |
| C55 | C | 3.82622 | 2.50729 | 0.54084 |
| C56 | C | 2.50729 | 12.45278 | 8.60736 |
| C57 | C | 4.39761 | 6.60586 | 4.12666 |
| C58 | C | 6.60586 | 11.88139 | 5.02154 |
| C59 | C | 11.88139 | 9.67314 | 4.12666 |
| C60 | C | 9.67314 | 4.39761 | 5.02154 |
| C61 | C | 12.53711 | 14.74536 | 8.70076 |
| C62 | C | 14.74536 | 3.74189 | 0.44744 |
| C63 | C | 3.74189 | 1.53364 | 8.70076 |
| C64 | C | 1.53364 | 12.53711 | 0.44744 |
| C65 | C | 3.76729 | 6.29265 | 2.81353 |
| C66 | C | 6.29265 | 12.51171 | 6.33467 |
| C67 | C | 12.51171 | 9.98635 | 2.81353 |
| C68 | C | 9.98635 | 3.76729 | 6.33467 |
| C69 | C | 11.90679 | 14.43215 | 7.38763 |
| C70 | C | 14.43215 | 4.37221 | 1.76057 |
| C71 | C | 4.37221 | 1.84685 | 7.38763 |
| C72 | C | 1.84685 | 11.90679 | 1.76057 |
| N73 | N | 3.85780 | 7.26450 | 1.92259 |
| N74 | N | 7.26450 | 12.42120 | 7.22561 |
| N75 | N | 12.42120 | 9.01450 | 1.92259 |
| N76 | N | 9.01450 | 3.85780 | 7.22561 |
| N77 | N | 11.99730 | 15.40400 | 6.49669 |
| N78 | N | 15.40400 | 4.28170 | 2.65151 |
| N79 | N | 4.28170 | 0.87500 | 6.49669 |
| N80 | N | 0.87500 | 11.99730 | 2.65151 |
| C81 | C | 2.99371 | 7.36104 | 0.79580 |
| C82 | C | 7.36104 | 13.28529 | 8.35240 |
| C83 | C | 13.28529 | 8.91796 | 0.79580 |
| C84 | C | 8.91796 | 2.99371 | 8.35240 |
| C85 | C | 11.13321 | 15.50054 | 5.36990 |
| C86 | C | 15.50054 | 5.14579 | 3.77830 |
| C87 | C | 5.14579 | 0.77846 | 5.36990 |
| C88 | C | 0.77846 | 11.13321 | 3.77830 |
| C89 | C | 3.13322 | 8.52043 | 0.01592 |
| C90 | C | 8.52043 | 13.14578 | 9.13228 |
| C91 | C | 13.14578 | 7.75857 | 0.01592 |
| C92 | C | 7.75857 | 3.13322 | 9.13228 |
| C93 | C | 11.27272 | 0.38093 | 4.59002 |
| C94 | C | 0.38093 | 5.00628 | 4.55818 |
| C95 | C | 5.00628 | 15.89807 | 4.59002 |
| C96 | C | 15.89807 | 11.27272 | 4.55818 |
| C97 | C | 1.99190 | 6.37648 | 0.48714 |
| C98 | C | 6.37648 | 14.28710 | 8.66106 |
| C99 | C | 14.28710 | 9.90252 | 0.48714 |
| C100 | C | 9.90252 | 1.99190 | 8.66106 |
| C101 | C | 10.13140 | 14.51598 | 5.06124 |
| C102 | C | 14.51598 | 6.14760 | 4.08696 |
| C103 | C | 6.14760 | 1.76302 | 5.06124 |
| C104 | C | 1.76302 | 10.13140 | 4.08696 |
| C105 | C | 2.23918 | 8.73271 | 8.13998 |
| C106 | C | 8.73271 | 14.03982 | 1.00822 |
| C107 | C | 14.03982 | 7.54629 | 8.13998 |
| C108 | C | 7.54629 | 2.23918 | 1.00822 |
| C109 | C | 10.37868 | 0.59321 | 3.56588 |
| C110 | C | 0.59321 | 5.90032 | 5.58232 |
| C111 | C | 5.90032 | 15.68579 | 3.56588 |
| C112 | C | 15.68579 | 10.37868 | 5.58232 |
| C113 | C | 1.11137 | 6.59967 | 8.60416 |
| C114 | C | 6.59967 | 15.16763 | 0.54404 |
| C115 | C | 15.16763 | 9.67933 | 8.60416 |
| C116 | C | 9.67933 | 1.11137 | 0.54404 |
| C117 | C | 9.25087 | 14.73917 | 4.03006 |
| C118 | C | 14.73917 | 7.02813 | 5.11814 |
| C119 | C | 7.02813 | 1.53983 | 4.03006 |
| C120 | C | 1.53983 | 9.25087 | 5.11814 |
| C121 | C | 1.18820 | 7.79325 | 7.85410 |
| C122 | C | 7.79325 | 15.09080 | 1.29410 |
| C123 | C | 15.09080 | 8.48575 | 7.85410 |
| C124 | C | 8.48575 | 1.18820 | 1.29410 |
| C125 | C | 9.32770 | 15.93275 | 3.28000 |
| C126 | C | 15.93275 | 6.95130 | 5.86820 |
| C127 | C | 6.95130 | 0.34625 | 3.28000 |
| C128 | C | 0.34625 | 9.32770 | 5.86820 |
| C129 | C | 8.13950 | 8.13950 | 0.00000 |
| C130 | C | 0.00000 | 0.00000 | 4.57410 |
| C131 | C | 0.00000 | 8.13950 | 6.86115 |
| C132 | C | 8.13950 | 0.00000 | 2.28705 |

**Table S3**. Fractional atomic coordinates and the unit cell of FCOF-XJ-OP.

| FCOF-XJ-OP | | Space group: I-4  a = 18.305(1) Å, b = 18.305(1) Å, c =9.592(2) Å, α = β= γ = 90o | | |
| --- | --- | --- | --- | --- |
| C1 | C | 7.97892 | 9.61154 | 7.72748 |
| O2 | O | 7.47206 | 8.43581 | 7.08968 |
| C3 | C | 9.15245 | 9.15245 | 8.5922 |
| C4 | C | 6.59946 | 8.52972 | 6.08165 |
| C5 | C | 10.32598 | 8.69336 | 7.72748 |
| C6 | C | 9.61154 | 10.32598 | 9.45692 |
| C7 | C | 8.69336 | 7.97892 | 9.45692 |
| C8 | C | 6.56524 | 9.58994 | 5.18514 |
| C9 | C | 5.73383 | 7.42923 | 5.93154 |
| O10 | O | 10.83284 | 9.86909 | 7.08968 |
| O11 | O | 8.43581 | 10.83284 | 10.09472 |
| O12 | O | 9.86909 | 7.47206 | 10.09472 |
| O13 | C | 5.68898 | 9.52715 | 4.14256 |
| C14 | C | 4.8422 | 7.39701 | 4.90726 |
| C15 | C | 11.70543 | 9.77518 | 6.08165 |
| C16 | C | 8.52972 | 11.70543 | 11.10275 |
| C17 | C | 9.77518 | 6.59946 | 11.10275 |
| C18 | C | 4.8076 | 8.43453 | 3.98902 |
| C19 | C | 11.73966 | 8.71496 | 5.18514 |
| C20 | C | 12.57107 | 10.87567 | 5.93154 |
| C21 | C | 9.58994 | 11.73966 | 11.99927 |
| C22 | C | 7.42923 | 12.57107 | 11.25286 |
| C23 | C | 8.71496 | 6.56524 | 11.99927 |
| C24 | C | 10.87567 | 5.73383 | 11.25286 |
| C25 | C | 3.8627 | 8.33056 | 2.92367 |
| C26 | C | 12.61592 | 8.77775 | 4.14256 |
| C27 | C | 13.4627 | 10.90789 | 4.90726 |
| C28 | C | 9.52715 | 12.61592 | 13.04184 |
| C29 | C | 7.39701 | 13.4627 | 12.27714 |
| C30 | C | 8.77775 | 5.68898 | 13.04184 |
| C31 | C | 10.90789 | 4.8422 | 12.27714 |
| N32 | N | 3.9566 | 9.06257 | 1.90317 |
| C33 | C | 13.4973 | 9.87037 | 3.98902 |
| C34 | C | 8.43453 | 13.4973 | 13.19539 |
| C35 | C | 9.87037 | 4.8076 | 13.19539 |
| C36 | C | 3.03715 | 8.94725 | 0.88732 |
| C37 | C | 14.4422 | 9.97434 | 2.92367 |
| C38 | C | 8.33056 | 14.4422 | 14.26073 |
| C39 | C | 9.97434 | 3.8627 | 14.26073 |
| C40 | C | 3.05344 | 9.98917 | -0.02208 |
| C41 | C | 2.10708 | 7.89527 | 0.69794 |
| N42 | N | 14.3483 | 9.24233 | 1.90317 |
| N43 | N | 9.06257 | 14.3483 | 15.28123 |
| N44 | N | 9.24233 | 3.9566 | 15.28123 |
| C45 | C | 2.14716 | 10.03218 | -1.04395 |
| C46 | C | 1.21453 | 7.9392 | -0.32668 |
| C47 | C | 15.26775 | 9.35765 | 0.88732 |
| C48 | C | 8.94725 | 15.26775 | 16.29708 |
| C49 | C | 9.35765 | 3.03715 | 16.29708 |
| C50 | C | 1.1922 | 9.01864 | -1.20592 |
| C51 | C | 15.25146 | 8.31573 | -0.02208 |
| C52 | C | 16.19782 | 10.40963 | 0.69794 |
| C53 | C | 9.98917 | 15.25146 | 17.20648 |
| C54 | C | 7.89527 | 16.19782 | 16.48646 |
| C55 | C | 8.31573 | 3.05344 | 17.20648 |
| C56 | C | 10.40963 | 2.10708 | 16.48646 |
| C57 | C | 0 | 9.15245 | -2.14805 |
| C58 | C | 16.15774 | 8.27272 | -1.04395 |
| C59 | C | 17.09037 | 10.3657 | -0.32668 |
| C60 | C | 10.03218 | 16.15774 | 18.22835 |
| C61 | C | 7.9392 | 17.09037 | 17.51108 |
| C62 | C | 8.27272 | 2.14716 | 18.22835 |
| C63 | C | 10.3657 | 1.21453 | 17.51108 |
| C64 | C | -1.1922 | 9.28626 | -1.20592 |
| C65 | C | -0.13381 | 7.96025 | -3.09018 |
| C66 | C | 0.13381 | 10.34465 | -3.09018 |
| C67 | C | 9.01864 | 17.1127 | 18.39032 |
| C68 | C | 9.28626 | 1.1922 | 18.39032 |
| C69 | C | 0.87973 | 7.00528 | -3.25215 |
| C70 | C | -1.21325 | 7.93792 | -3.96942 |
| C71 | C | -0.87973 | 11.29961 | -3.25215 |
| C72 | C | 1.21325 | 10.36698 | -3.96942 |
| C73 | C | 9.15245 | 18.3049 | 19.33245 |
| C74 | C | 0.83672 | 6.09901 | -4.27402 |
| C75 | C | -1.25718 | 7.04537 | -4.99404 |
| C76 | C | -0.83672 | 12.20589 | -4.27402 |
| C77 | C | 1.25718 | 11.25953 | -4.99404 |
| C78 | C | 10.34465 | 18.17109 | 20.27458 |
| C79 | C | 7.96025 | 18.43871 | 20.27458 |
| C80 | C | -0.2052 | 6.1153 | -5.18342 |
| C81 | C | 0.2052 | 12.1896 | -5.18342 |
| C82 | C | 11.29961 | 19.18463 | 20.43655 |
| C83 | C | 10.36698 | 17.09165 | 21.15382 |
| C84 | C | 7.00528 | 17.42517 | 20.43655 |
| C85 | C | 7.93792 | 19.51815 | 21.15382 |
| N86 | N | -0.08988 | 5.19585 | -6.19927 |
| N87 | N | 0.08988 | 13.10905 | -6.19927 |
| C88 | C | 12.20589 | 19.14161 | 21.45842 |
| C89 | C | 11.25953 | 17.04772 | 22.17844 |
| C90 | C | 6.09901 | 17.46818 | 21.45842 |
| C91 | C | 7.04537 | 19.56208 | 22.17844 |
| C92 | C | -0.82189 | 5.28975 | -7.21977 |
| C93 | C | 0.82189 | 13.01515 | -7.21977 |
| C94 | C | 12.1896 | 18.0997 | 22.36782 |
| C95 | C | 6.1153 | 18.5101 | 22.36782 |
| C96 | C | -0.71792 | 4.34485 | -8.28512 |
| C97 | C | 0.71792 | 13.96005 | -8.28512 |
| N98 | N | 13.10905 | 18.21502 | 23.38367 |
| N99 | N | 5.19585 | 18.39478 | 23.38367 |
| C100 | C | 0.3747 | 3.46347 | -8.43866 |
| C101 | C | -1.75544 | 4.31025 | -9.20336 |
| C102 | C | -0.3747 | 14.84143 | -8.43866 |
| C103 | C | 1.75544 | 13.99465 | -9.20336 |
| C104 | C | 13.01515 | 17.48301 | 24.40417 |
| C105 | C | 5.28975 | 19.12679 | 24.40417 |
| C106 | C | 0.43749 | 2.58721 | -9.48124 |
| C107 | C | -1.72322 | 3.41862 | -10.2276 |
| C108 | C | -0.43749 | 15.71768 | -9.48124 |
| C109 | C | 1.72322 | 14.88628 | -10.2276 |
| C110 | C | 13.96005 | 17.58698 | 25.46952 |
| C111 | C | 4.34485 | 19.02282 | 25.46952 |
| C112 | C | -0.62273 | 2.55298 | -10.3777 |
| C113 | C | 0.62273 | 15.75191 | -10.3777 |
| C114 | C | 14.84143 | 18.6796 | 25.62306 |
| C115 | C | 13.99465 | 16.54946 | 26.38776 |
| C116 | C | 3.46347 | 17.9302 | 25.62306 |
| C117 | C | 4.31025 | 20.06034 | 26.38776 |
| O118 | O | -0.71664 | 1.68039 | -11.3858 |
| O119 | O | 0.71664 | 16.62451 | -11.3858 |
| C120 | C | 15.71768 | 18.74239 | 26.66564 |
| C121 | C | 14.88628 | 16.58168 | 27.41204 |
| C122 | C | 2.58721 | 17.86741 | 26.66564 |
| C123 | C | 3.41862 | 20.02812 | 27.41204 |
| C124 | C | 0.45909 | 1.17353 | -12.0236 |
| C125 | C | -0.45909 | 17.13137 | -12.0236 |
| C126 | C | 15.75191 | 17.68217 | 27.56215 |
| C127 | C | 2.55298 | 18.92763 | 27.56215 |
| C128 | C | 0 | 0 | -12.8883 |
| O129 | O | 16.62451 | 17.58826 | 28.57018 |
| O130 | O | 1.68039 | 19.02154 | 28.57018 |
| C131 | C | -1.17353 | 0.45909 | -13.753 |
| C132 | C | 1.17353 | -0.45909 | -13.753 |


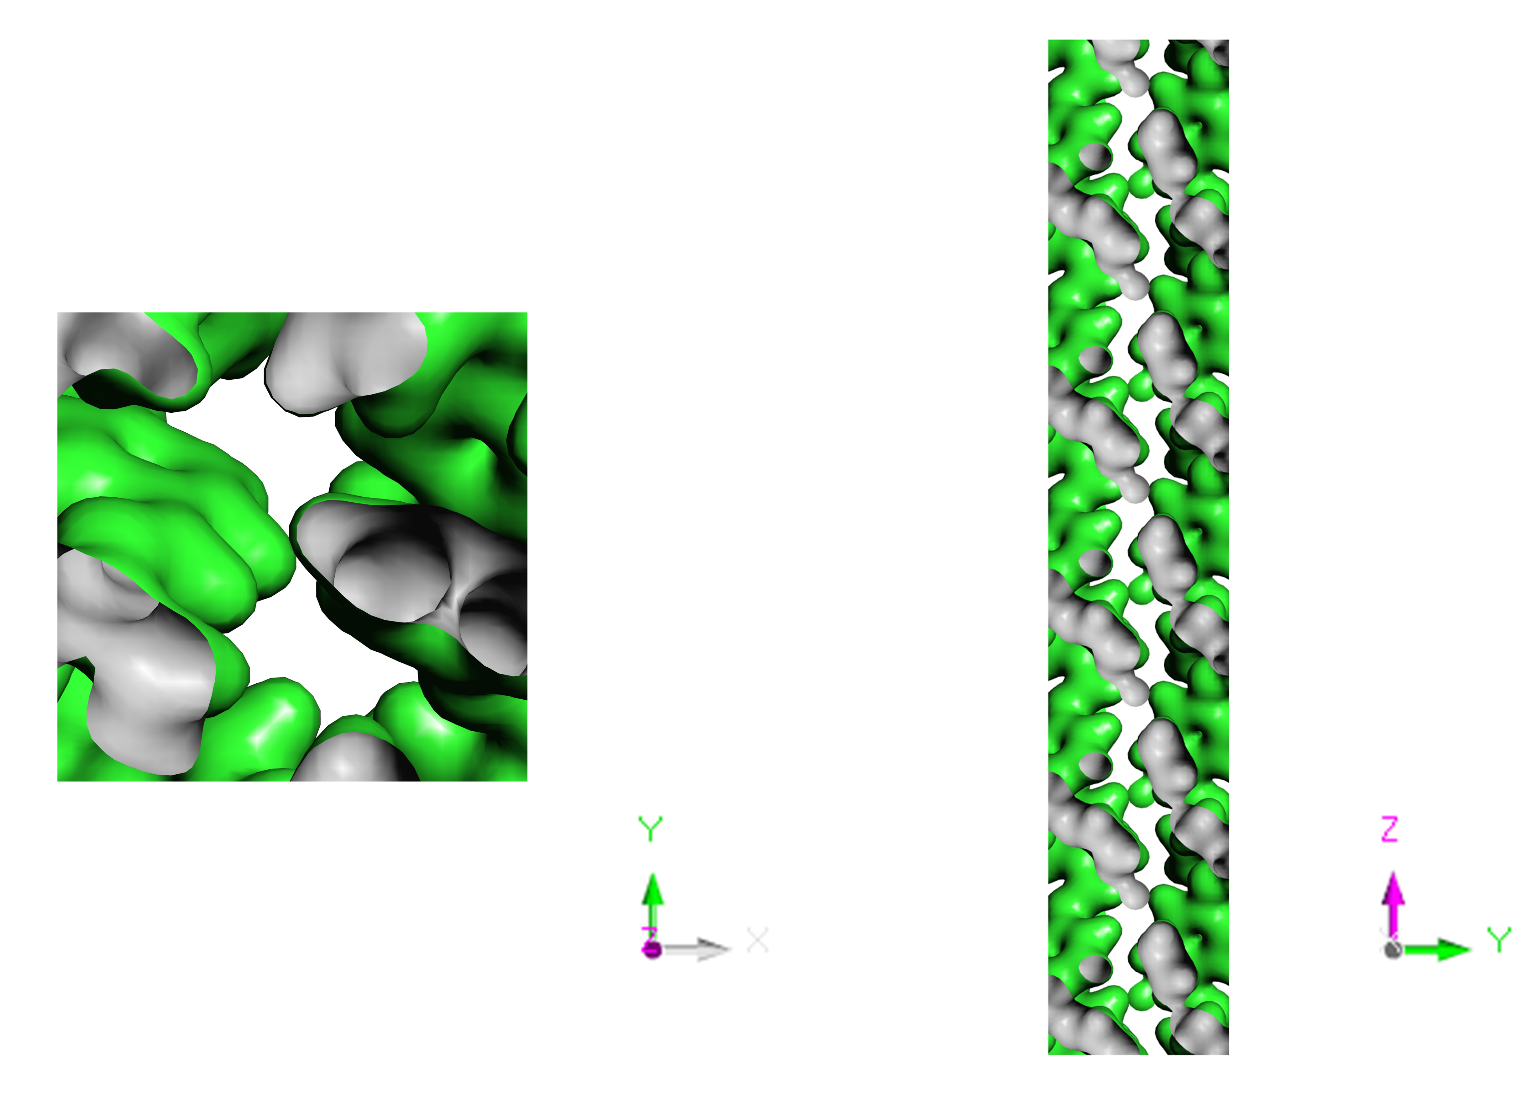


**Figure S15**. Electron density distribution along the Z-axis (left) and X-axis (right) of FCOF-XJ-CP.


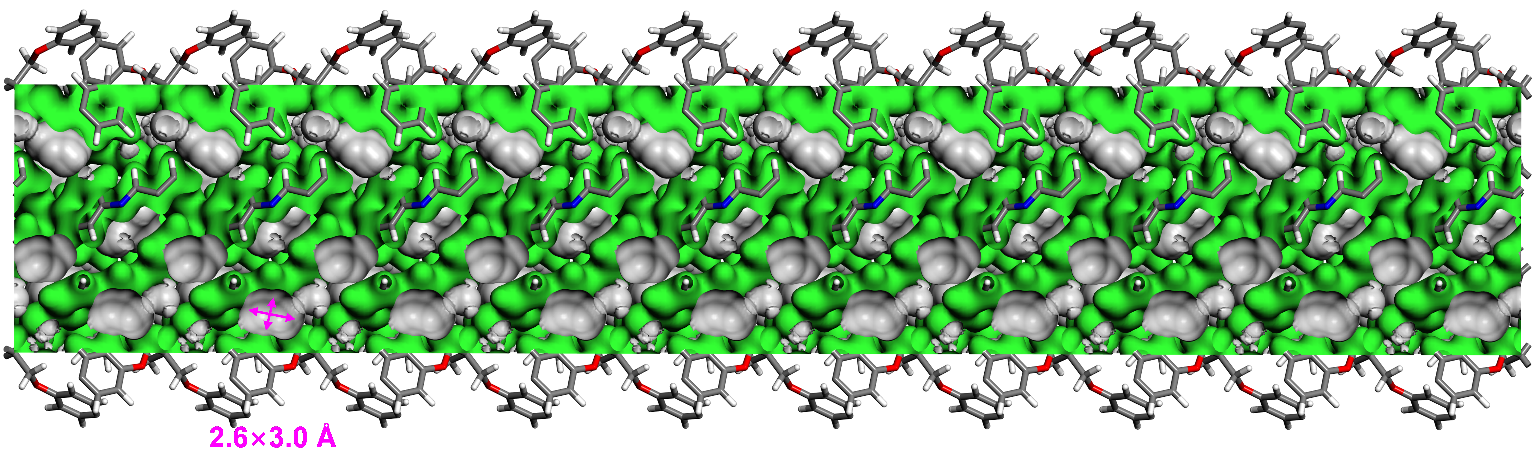


**Figure S16**. Pore diagram of FCOF-XJ-CP.


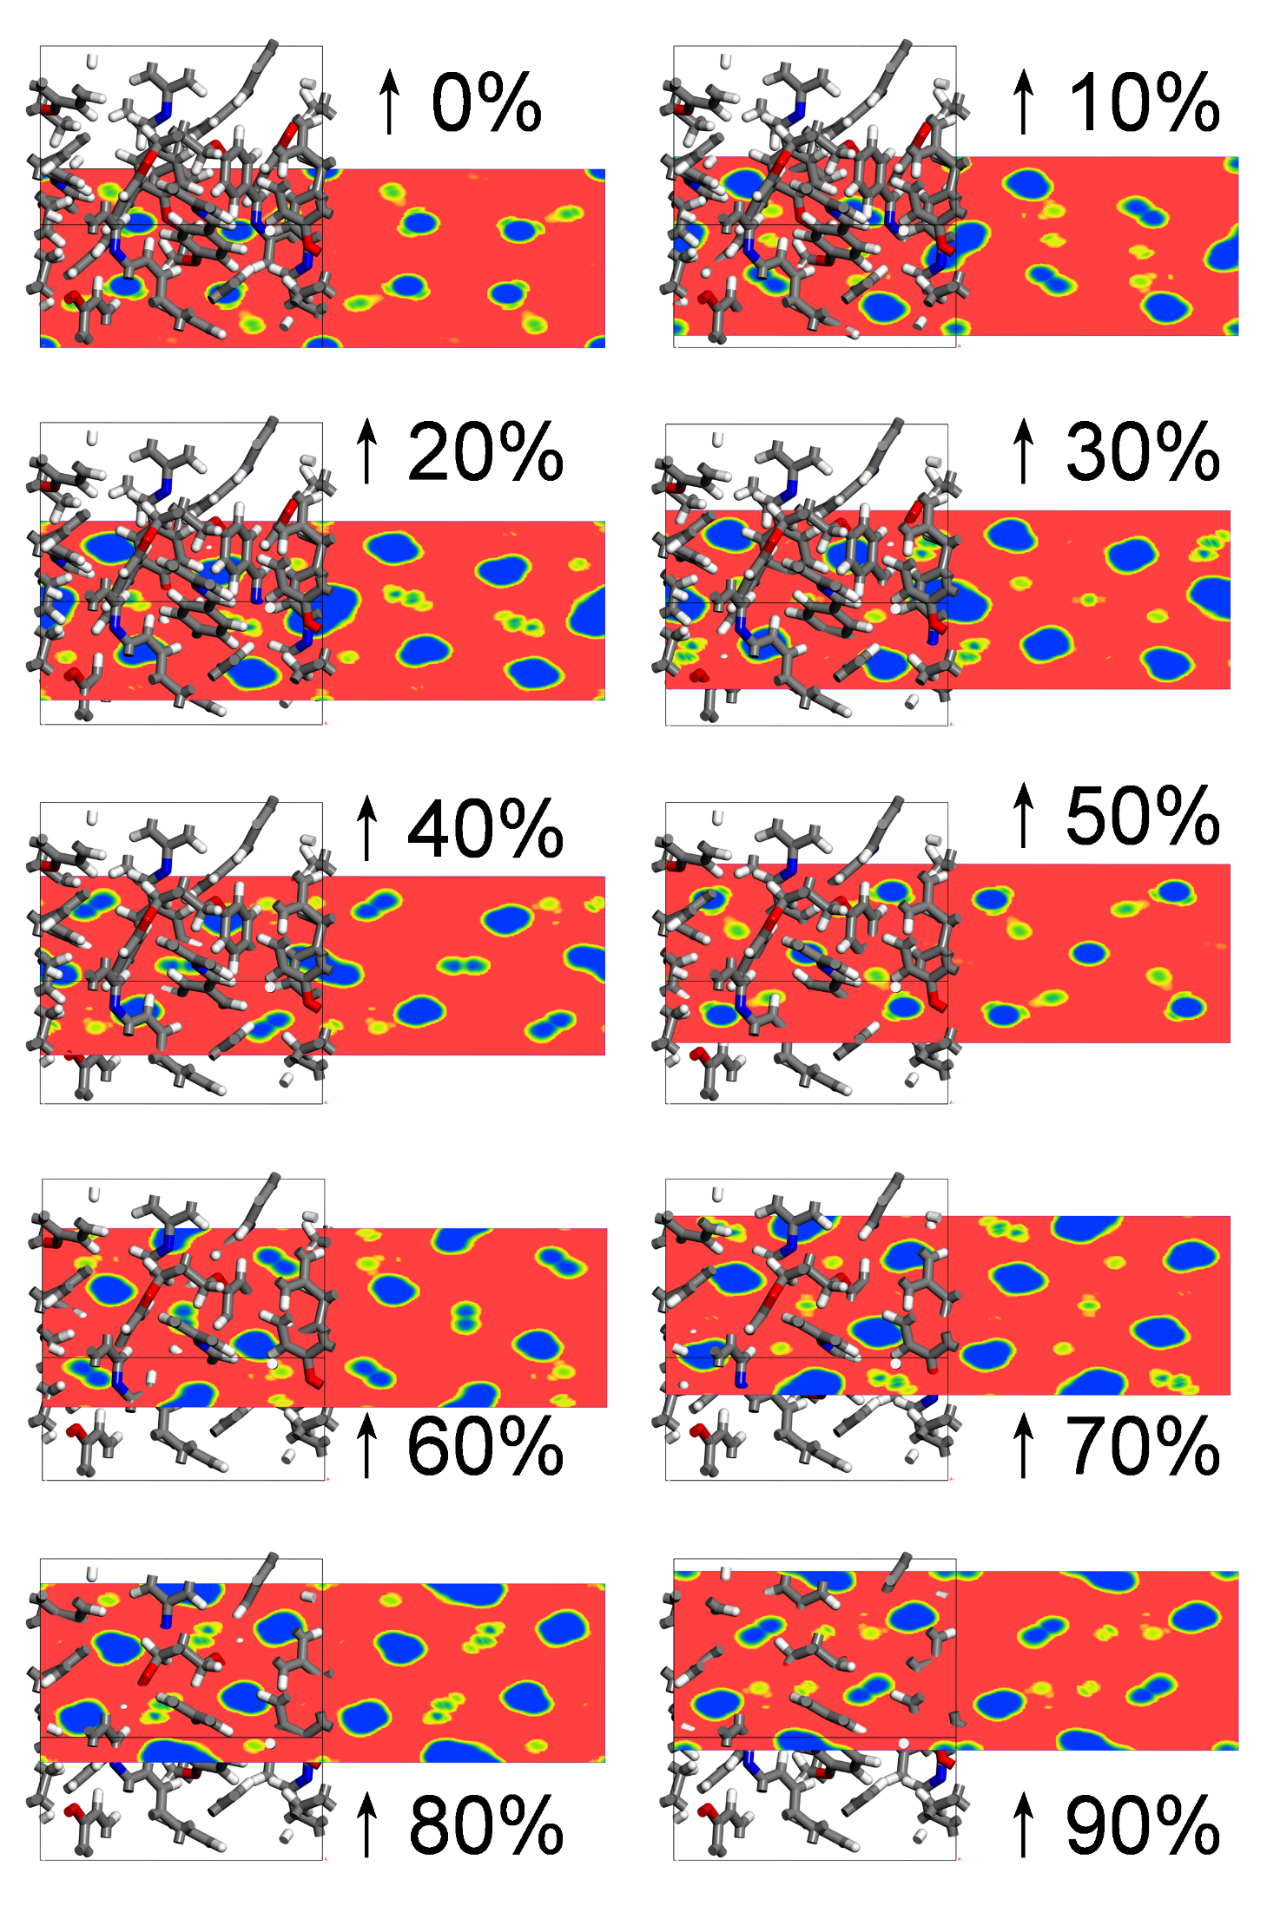


**Figure S17**. Distribution of pores and skeletons in the FCOF-XJ-CP unit cell from bottom to top (blue: pores; red: skeleton)


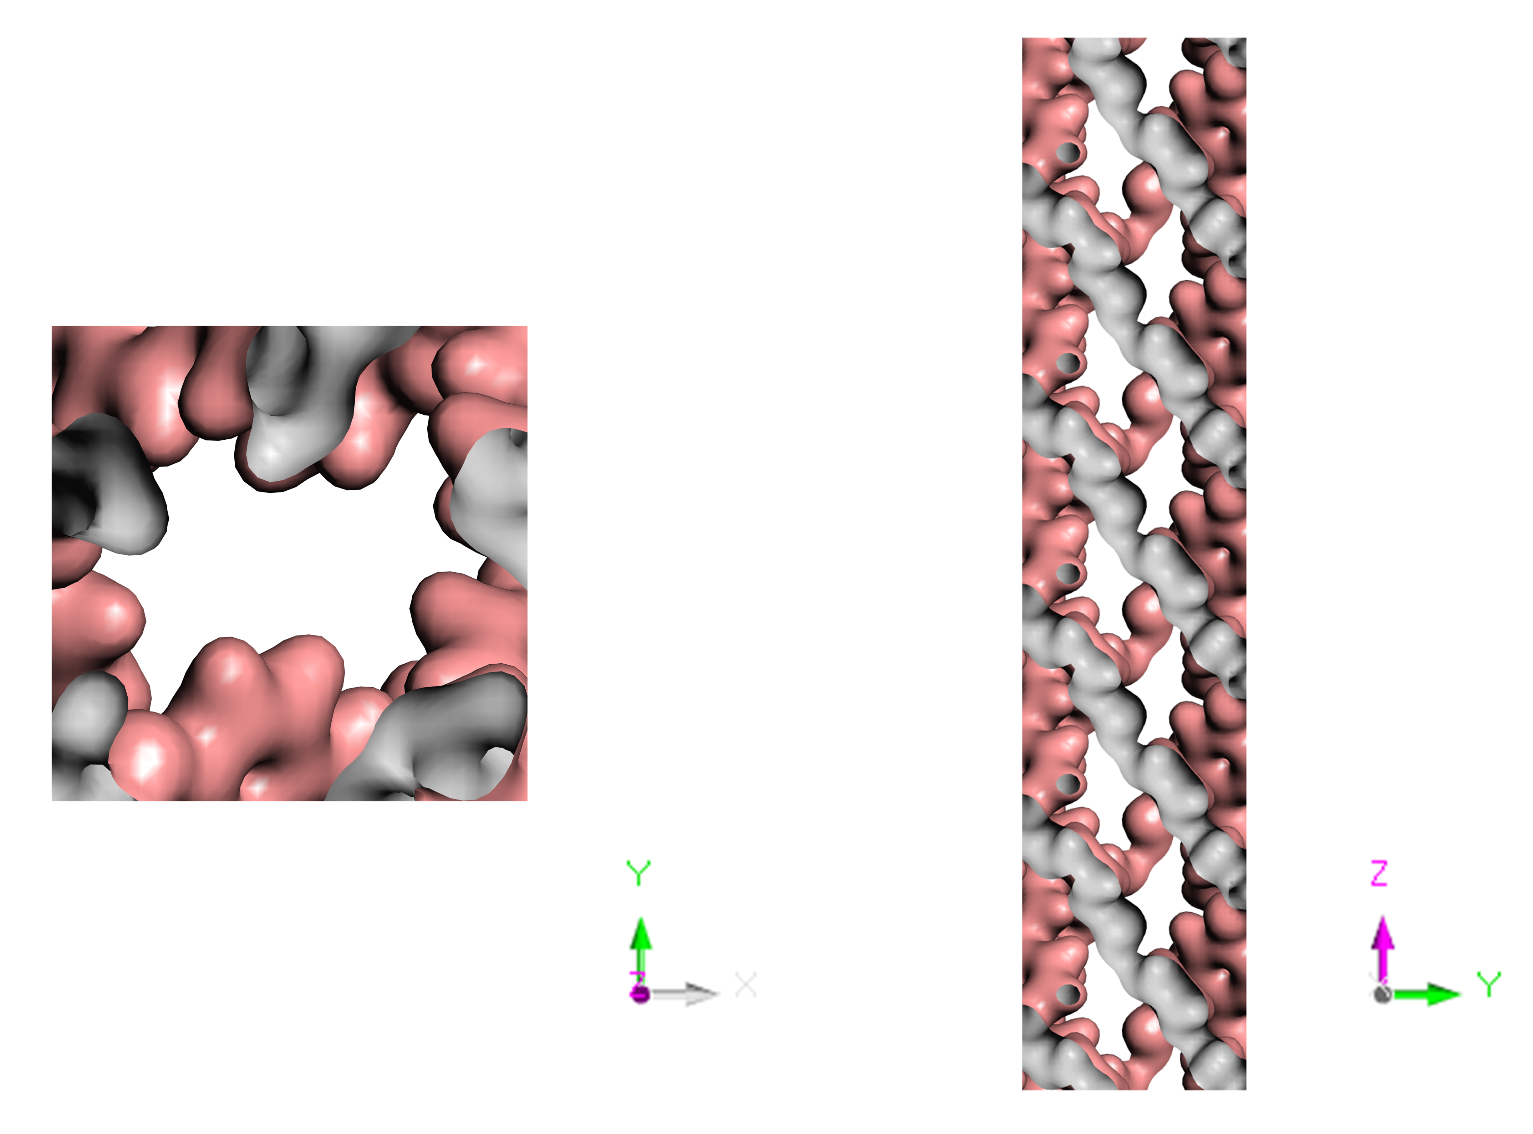


**Figure S18.** Electron density distribution along the Z-axis (left) and X-axis (right) of FCOF-XJ-OP


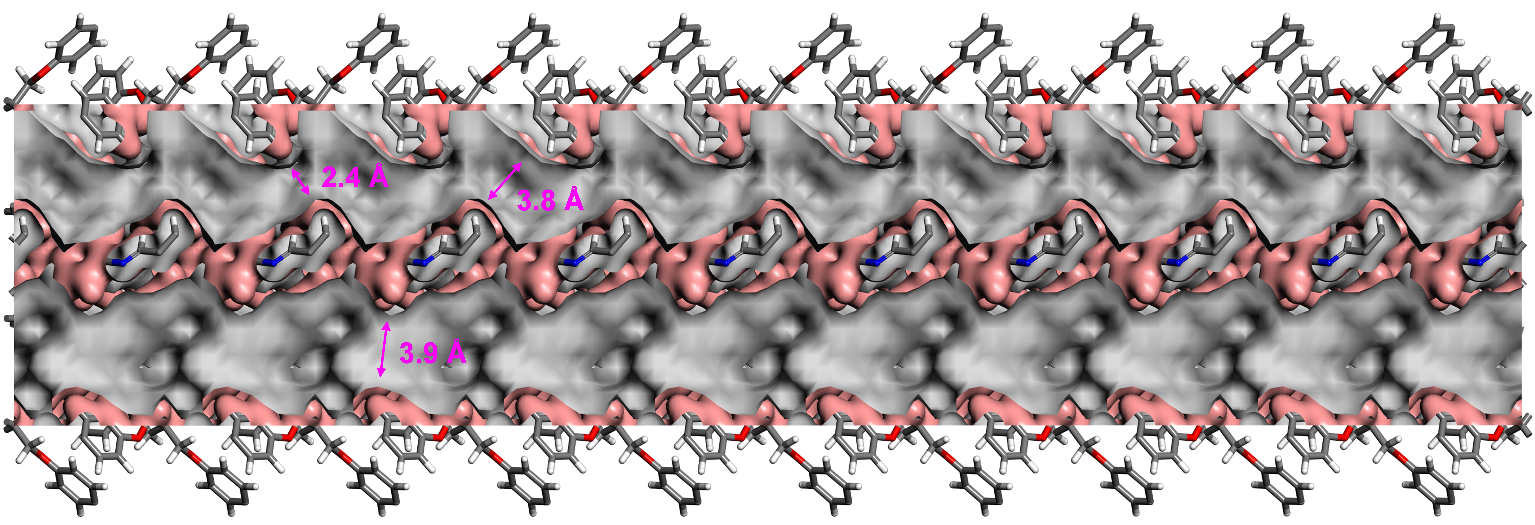


**Figure S19**. Pore diagram of FCOF-XJ-OP.


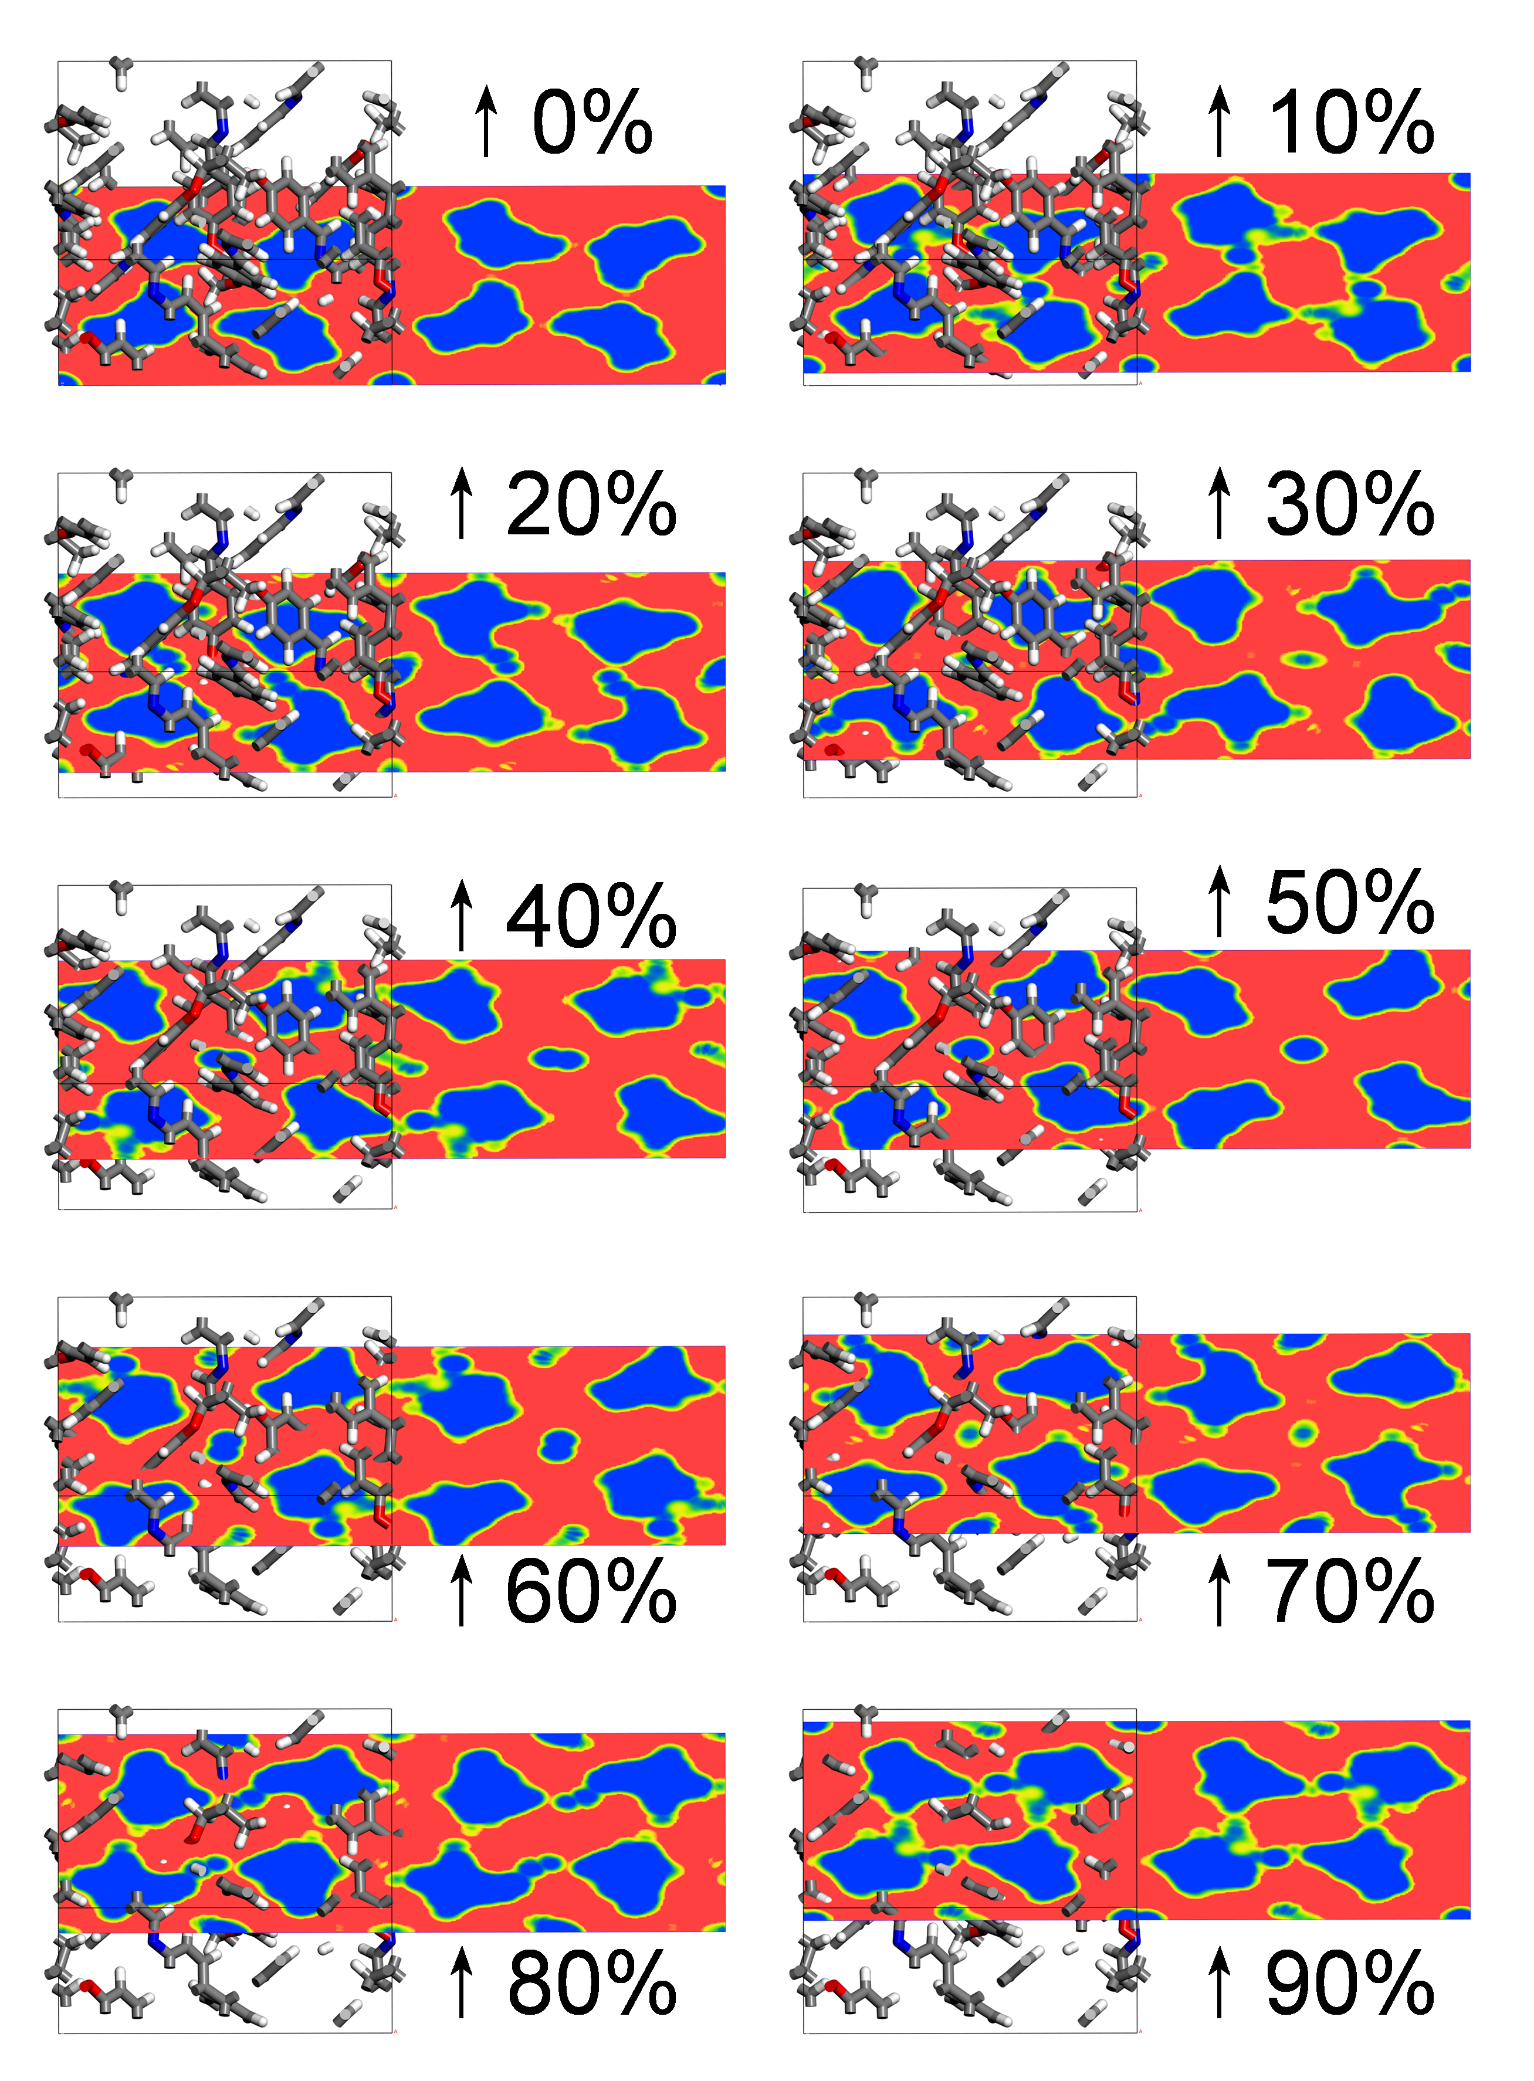


**Figure S20**. Distribution of pores and skeletons in the FCOF-XJ-OP unit cell from bottom to top (blue: pores; red: skeleton)

**
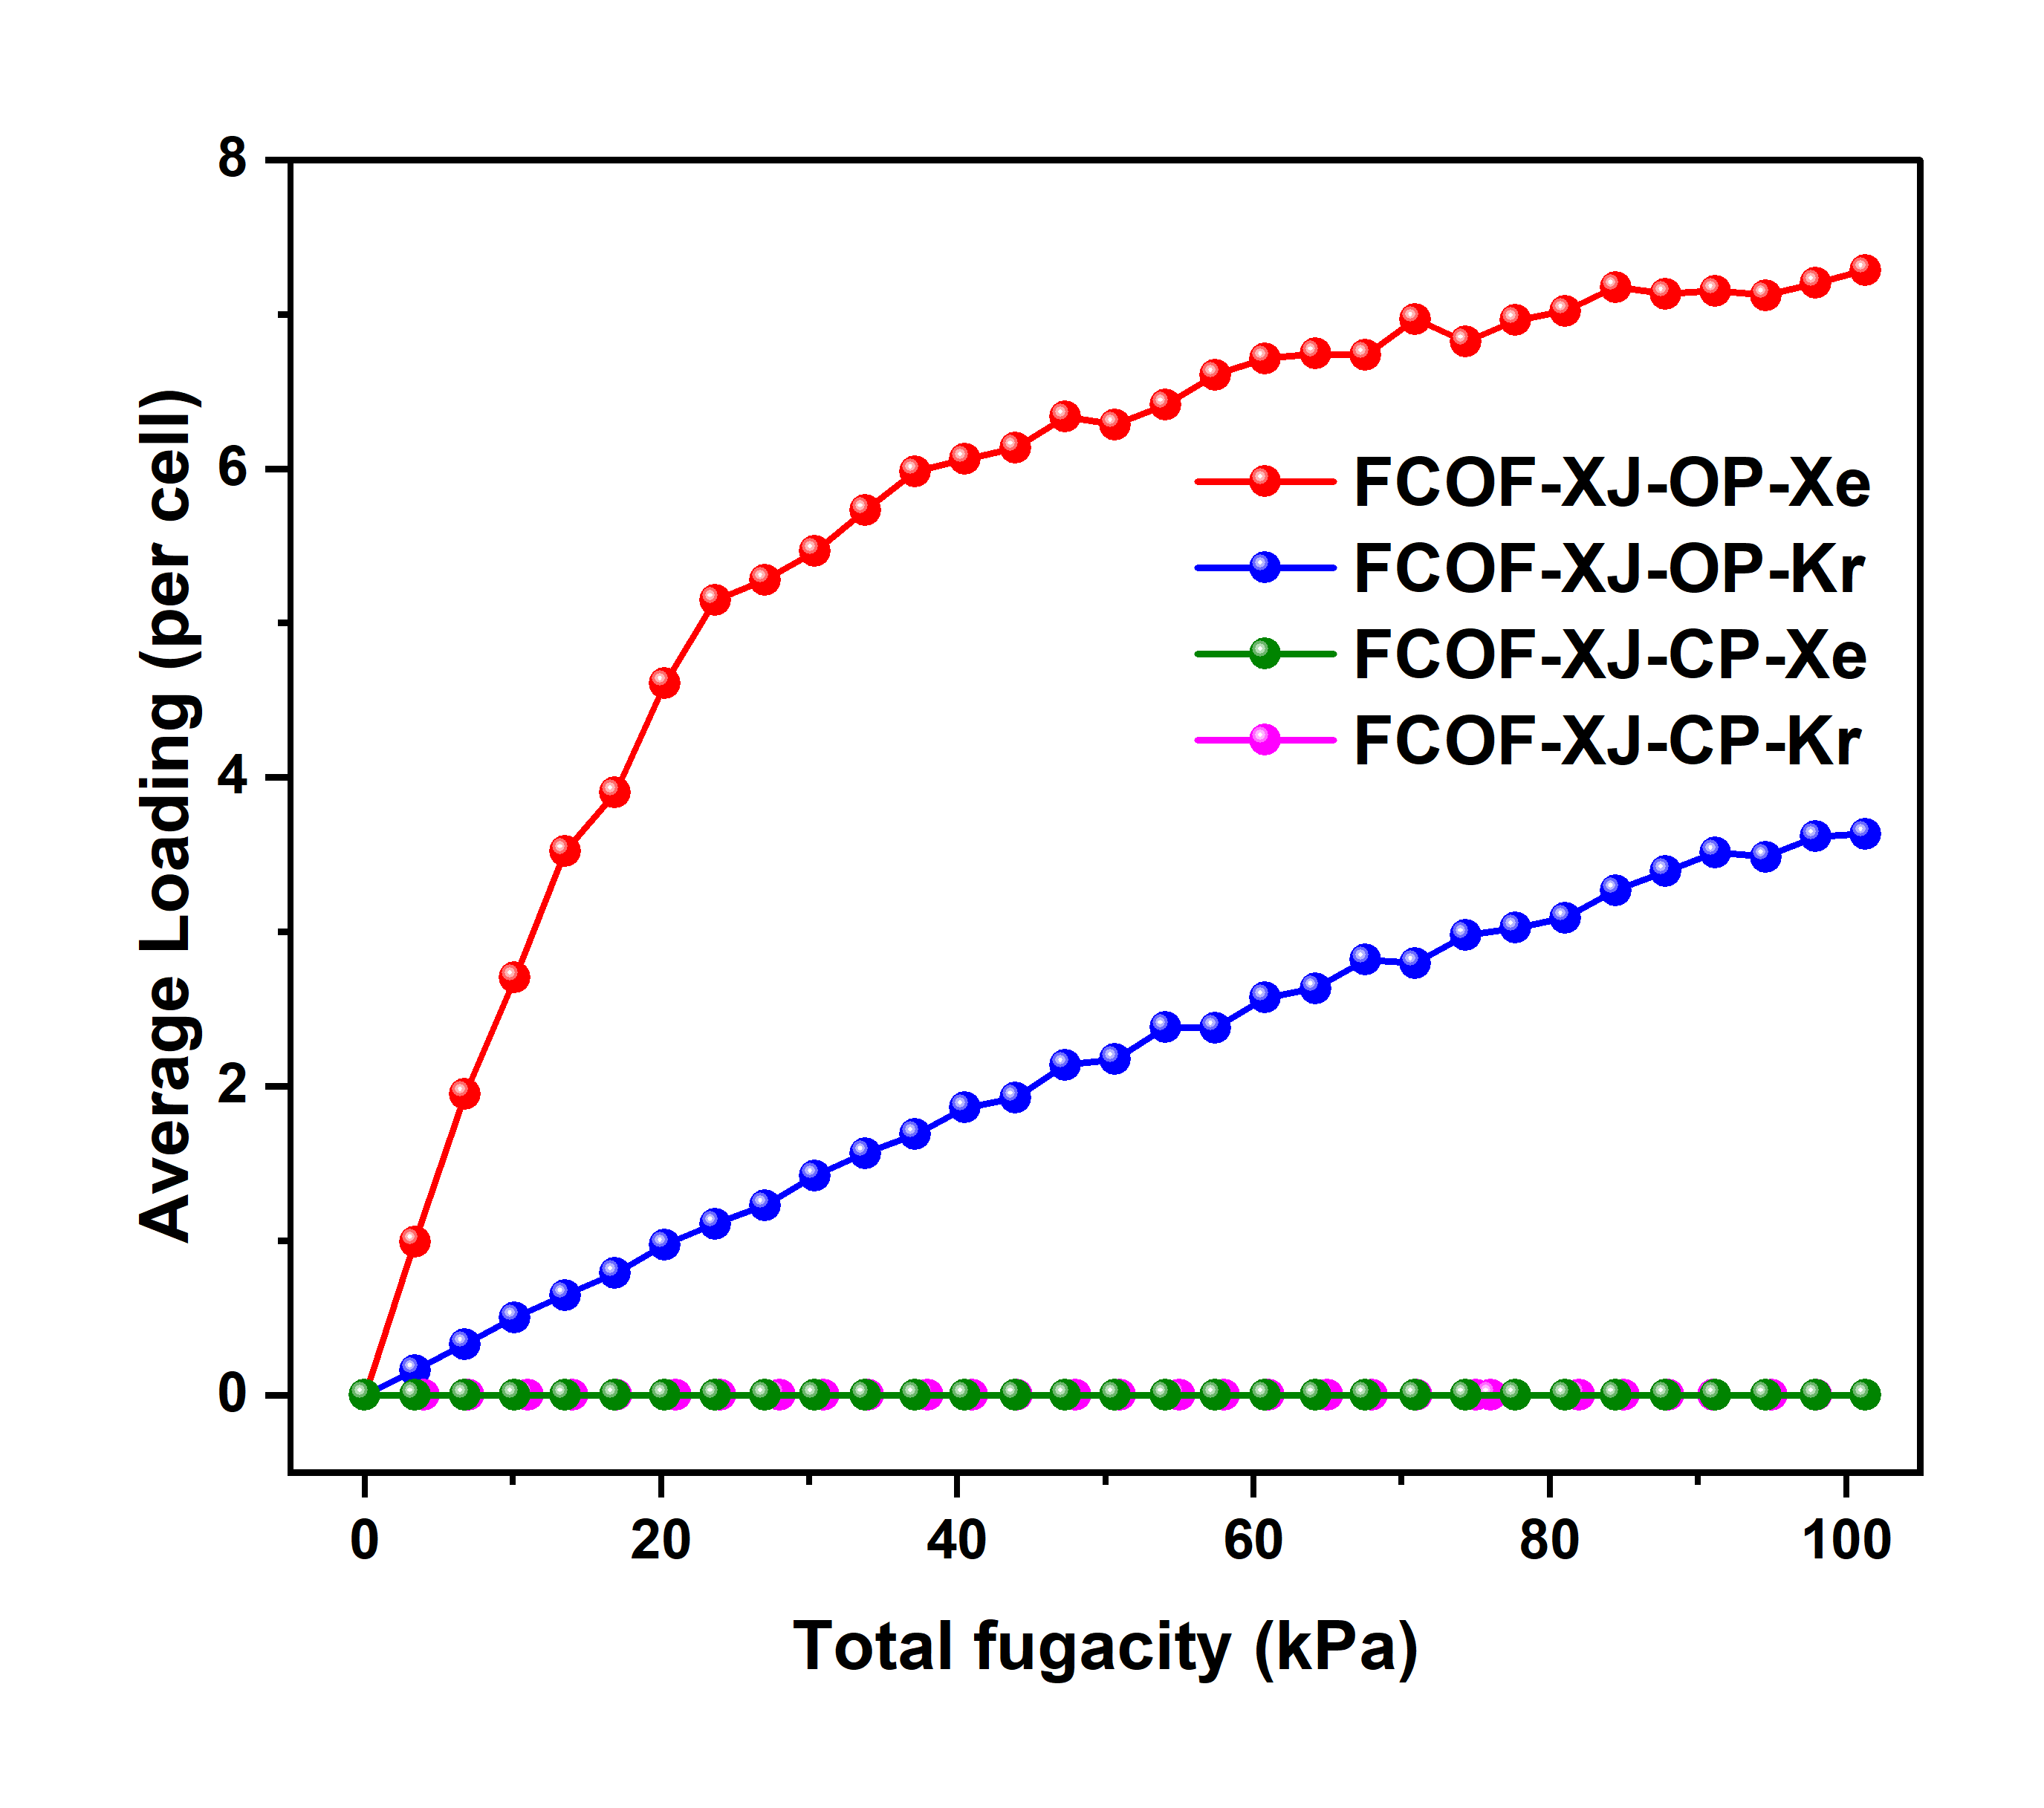
**

**Figure S21.** Simulated adsorption amount of Xe and Kr by FCOF-XJ-OP and FCOF-XJ-CP at 273 K.

# Section 6. Column Breakthrough Measurement Experiments


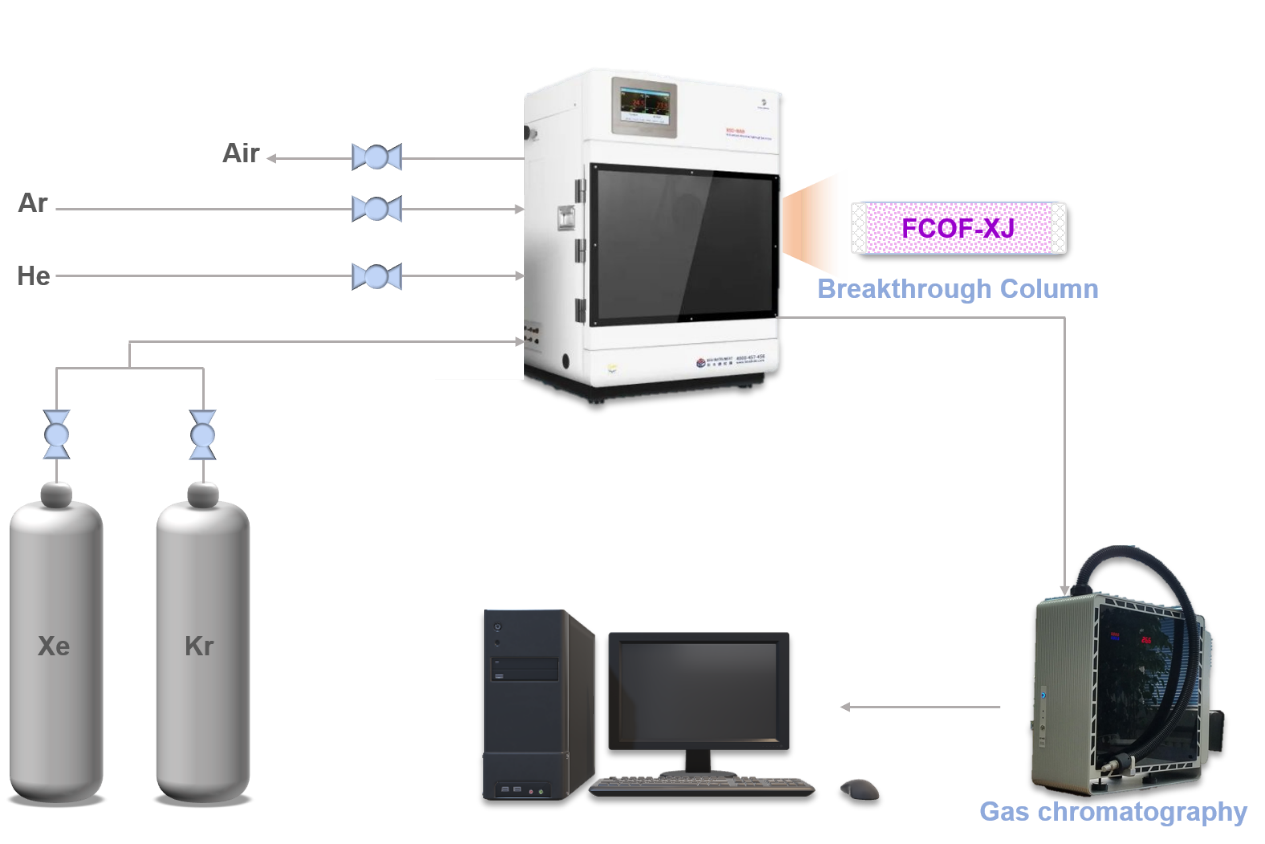


**Figure S22**. The apparatus of column breakthrough experimengts.


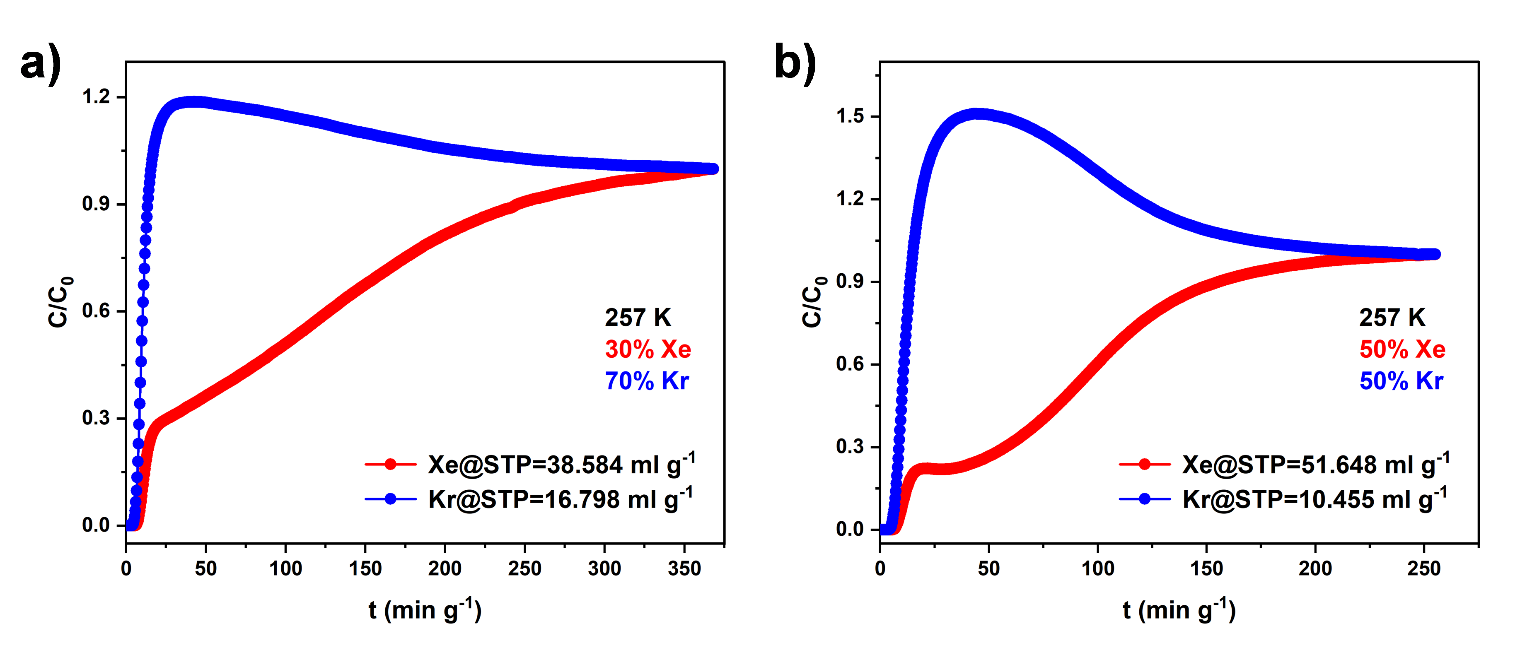


**Figure S23**. Dynamic breakthrough patterns of Xe/Kr at 257 K with different gas ratios. (a). 257K, Xe/Kr = 3:7; (b). 257 K, Xe/Kr = 5:5 (Xe flow rate: red; Kr flow rate: blue, total flow rate: 1.0 mL min-1).


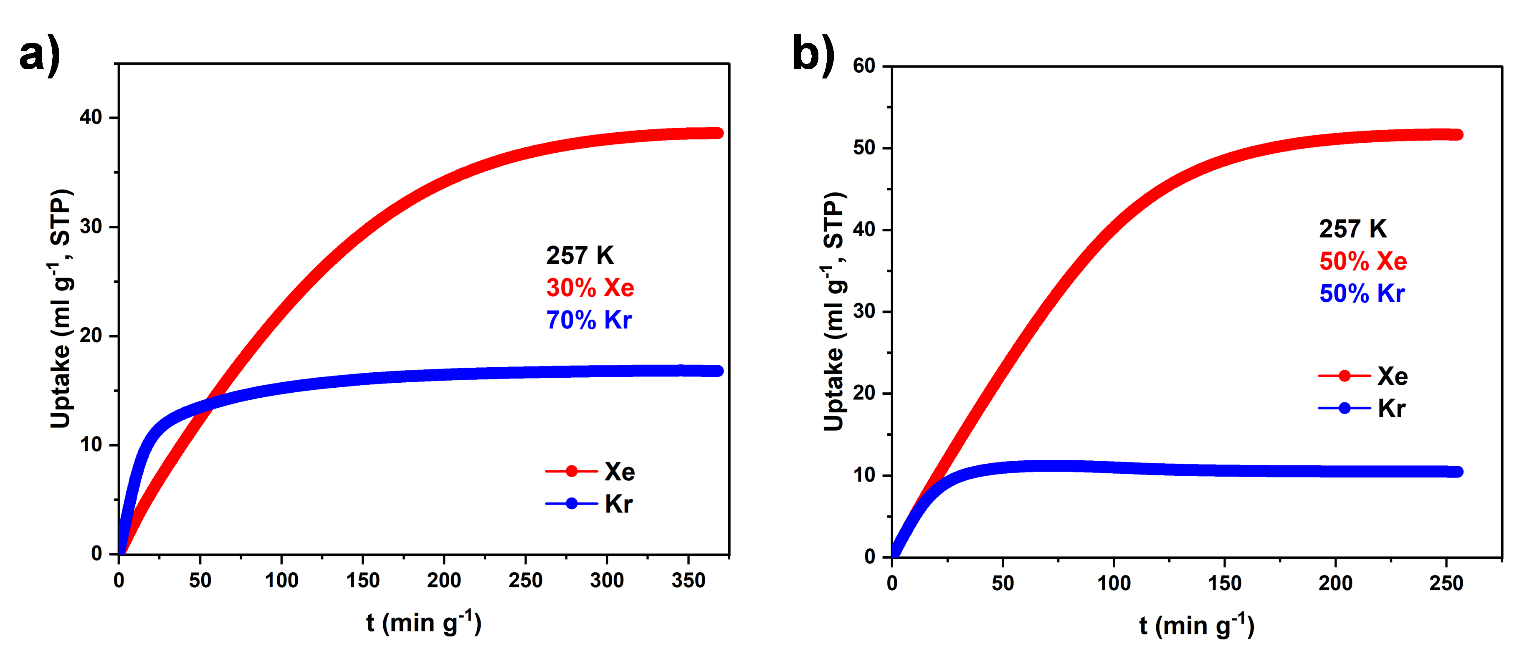


**Figure S24**. Dynamic breakthrough cumulative adsorption patterns of Xe/Kr at 257 K with different gas ratios. (a). 257 K, Xe/Kr = 3:7; (b). 257 K, Xe/Kr = 5:5 (Xe flow rate: red; Kr flow rate: blue, total flow rate: 1.0 mL min-1).


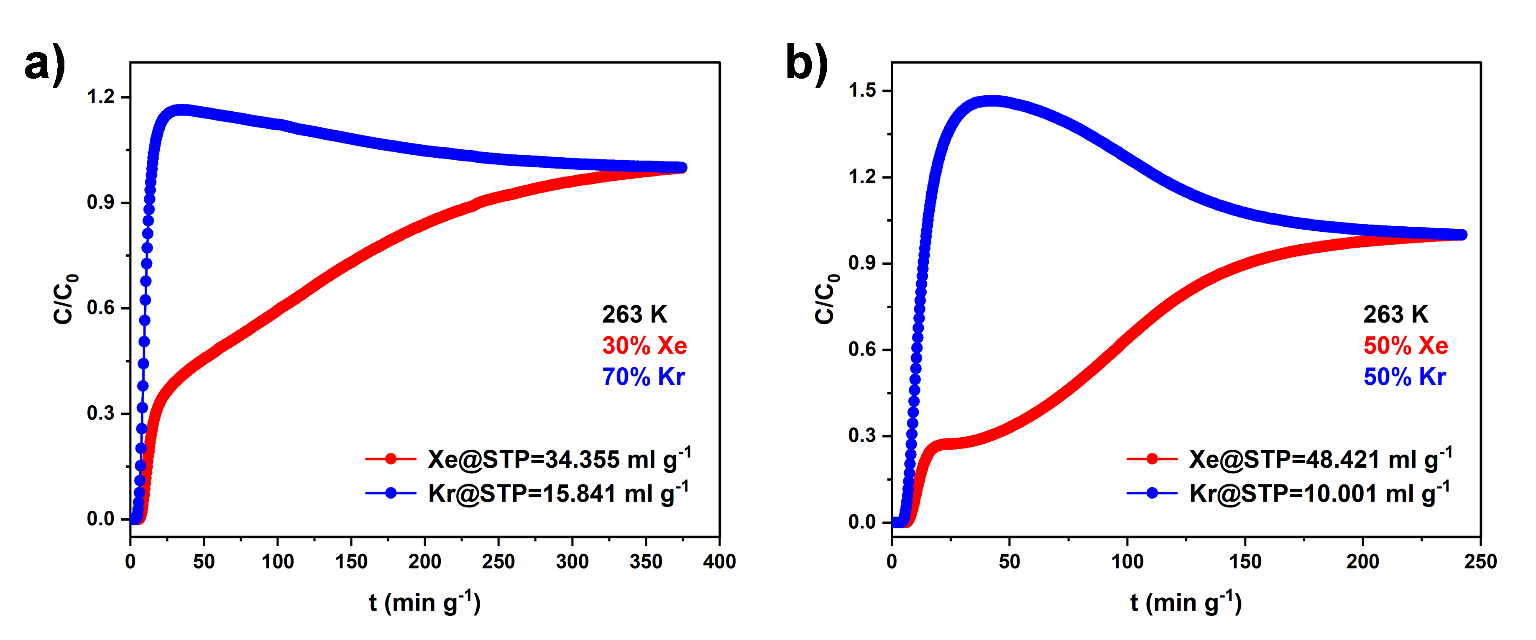


**Figure S25**.Dynamic breakthrough patterns of Xe/Kr at 263 K with different gas ratios. (a). 263 K, Xe/Kr = 3:7; (b). 263 K, Xe/Kr = 5:5 (Xe flow rate: red; Kr flow rate: blue, total flow rate: 1.0 mL min-1).


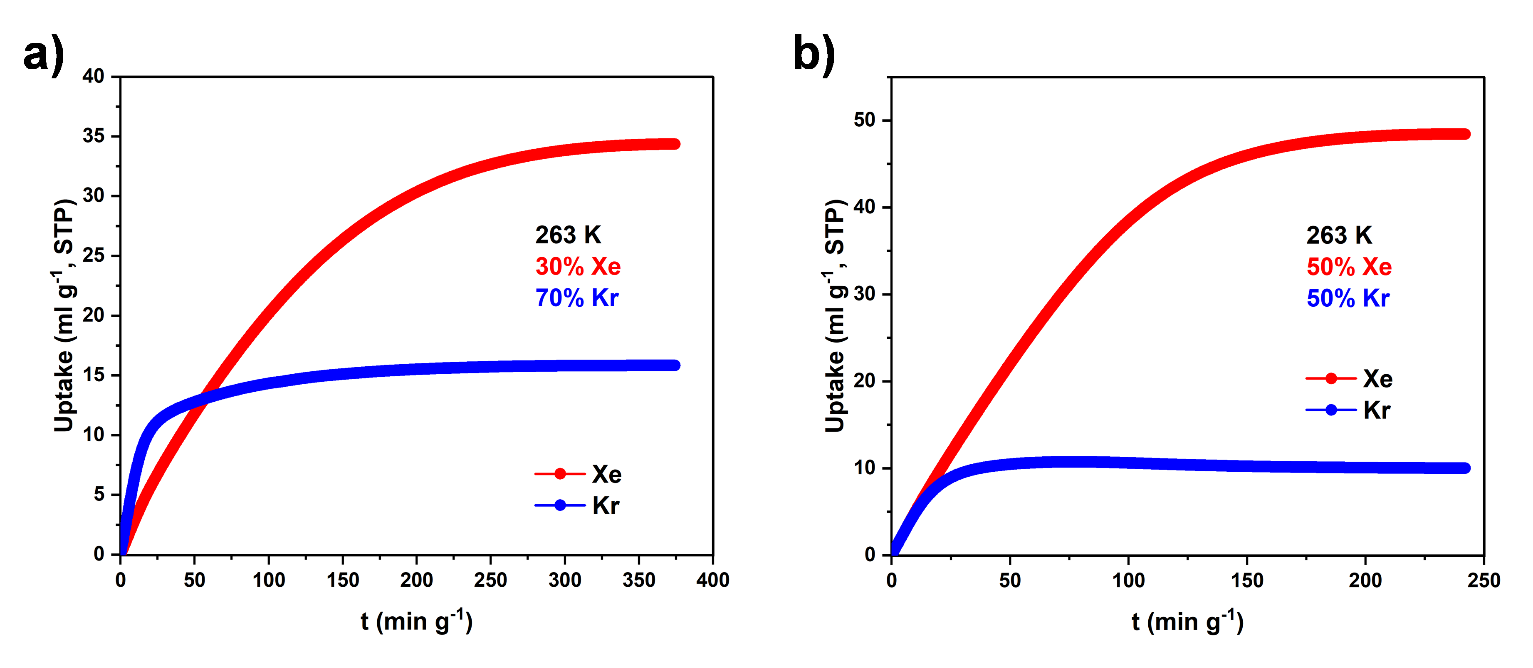


**Figure S26**. Dynamic breakthrough cumulative adsorption patterns of Xe/Kr at 263 K with different gas ratios. (a). 263 K, Xe/Kr = 3:7; (b). 263 K, Xe/Kr = 5:5 (Xe flow rate: red; Kr flow rate: blue, total flow rate: 1.0 mL min-1).


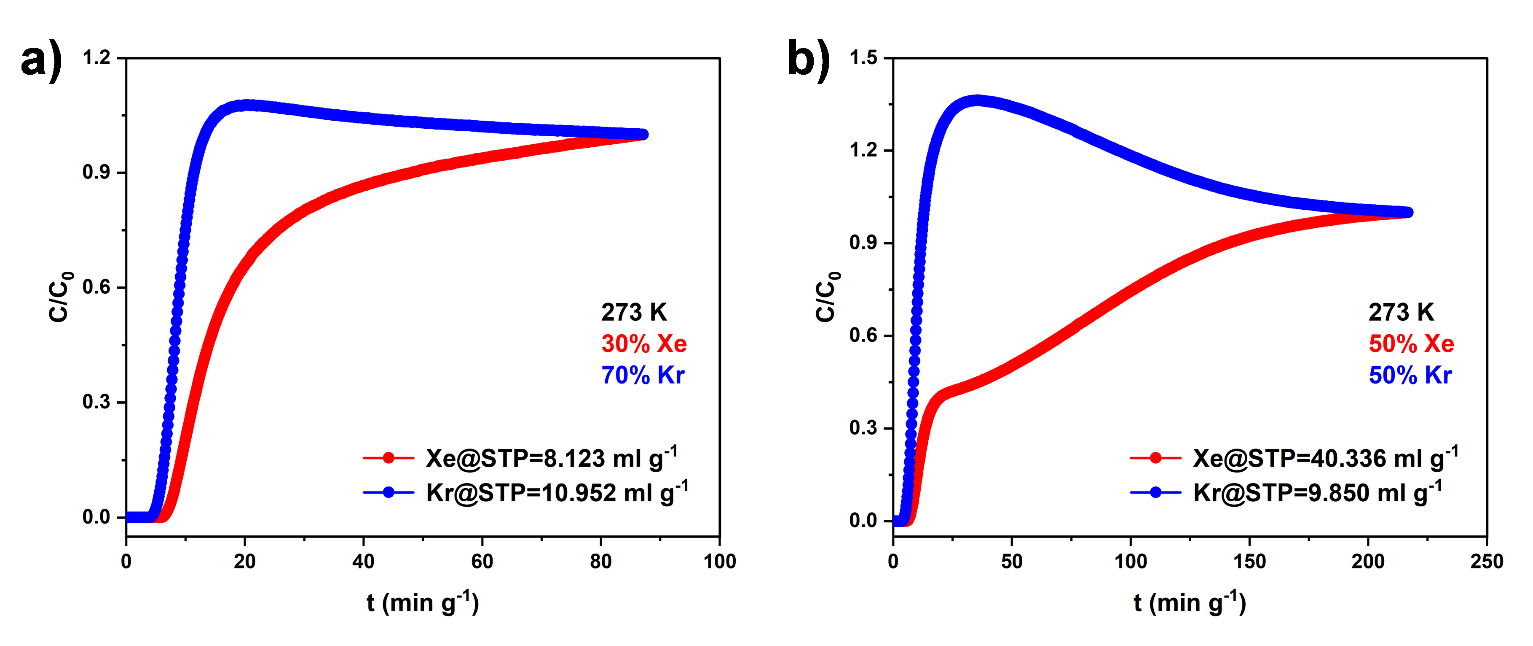


**Figure S27**. Dynamic breakthrough patterns of Xe/Kr at 273 K with different gas ratios. (a). 273 K, Xe/Kr = 3:7; (b). 273 K, Xe/Kr = 5:5 (Xe flow rate: red; Kr flow rate: blue, total flow rate: 1.0 mL min-1).


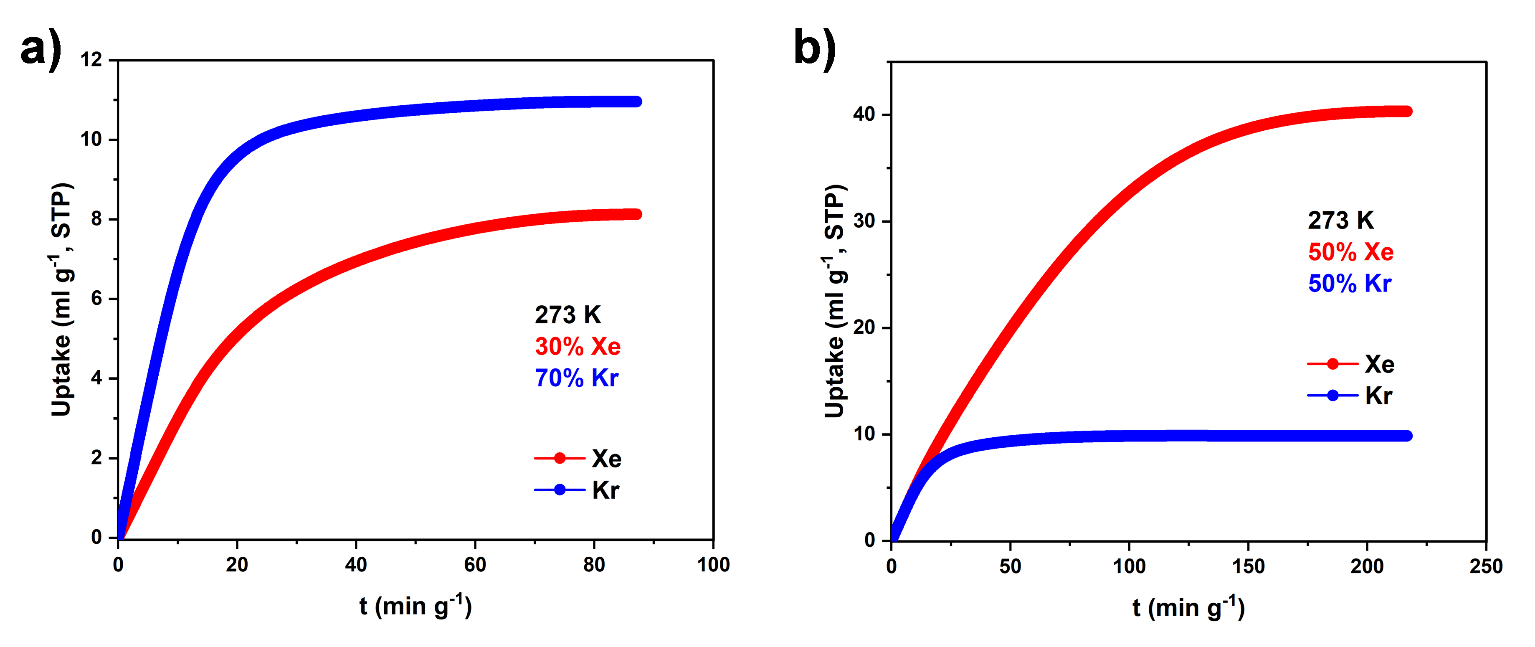


**Figure S28**. Dynamic breakthrough cumulative adsorption patterns of Xe/Kr at 273 K with different gas ratios. (a). 273 K, Xe/Kr = 3:7; (b). 273 K, Xe/Kr = 5:5 (Xe flow rate: red; Kr flow rate: blue, total flow rate: 1.0 mL min-1).


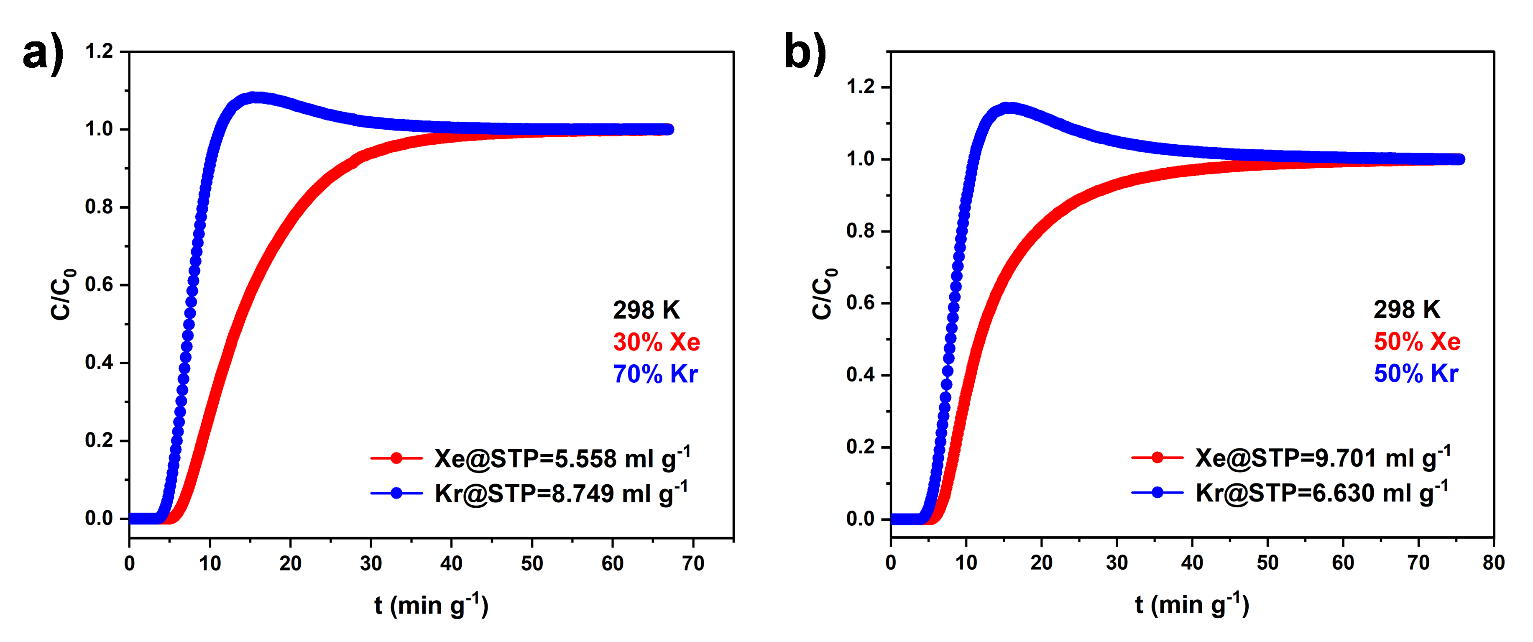


**Figure S29**. Dynamic breakthrough patterns at 298 K with different gas ratios. (a). 298 K, Xe/Kr = 3:7; (b). 298 K, Xe/Kr = 5:5 (Xe flow rate: red; Kr flow rate: blue, total flow rate: 1.0 mL min-1).


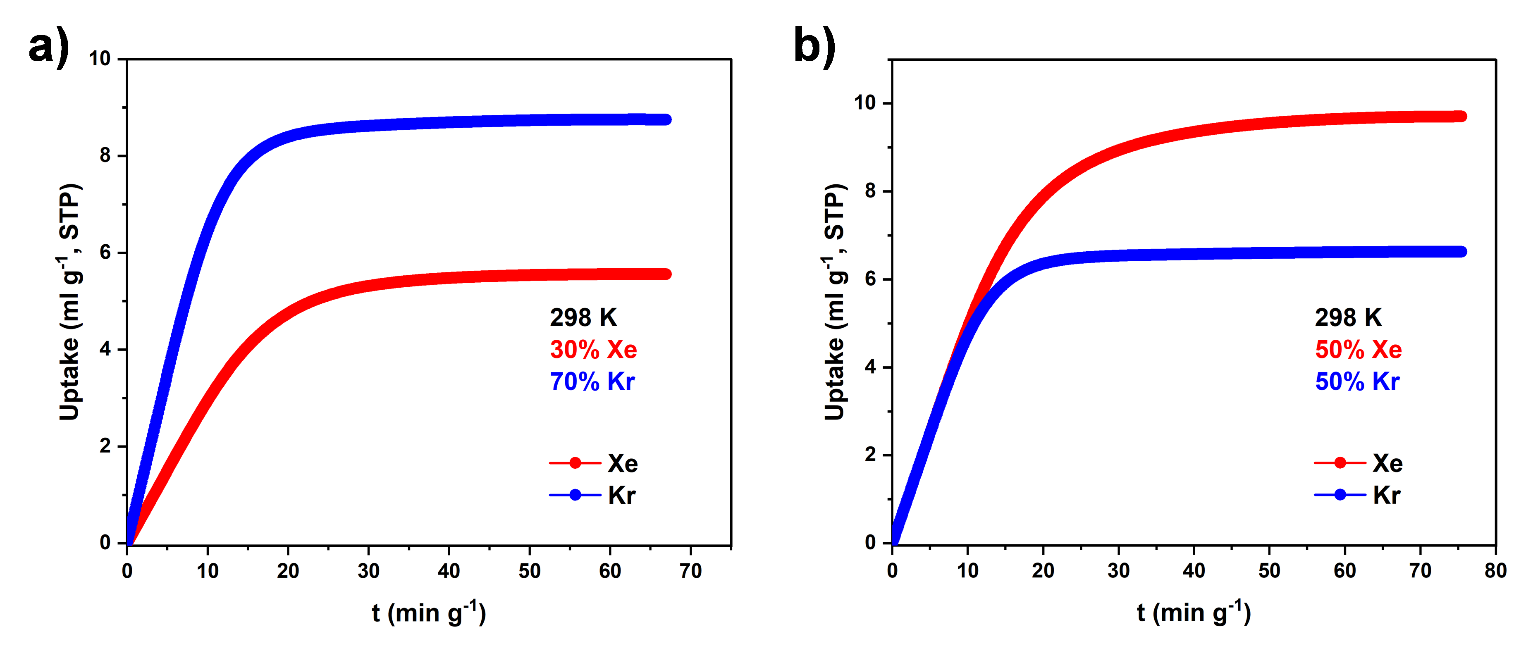


**Figure S30**. Dynamic breakthrough cumulative adsorption patterns at 298 K with different gas ratios. (a). 298 K, Xe/Kr = 3:7; (b). 298 K, Xe/Kr = 5:5 (Xe flow rate: red; Kr flow rate: blue, total flow rate: 1.0 mL min-1).

**Desorption experiments**

Xenon captured during breakthrough experiments can be recovered by a desorption process at 353 K. Upon completion of the breakthrough experiment, the xenon krypton gas flow was shut off, argon was introduced at a flow rate of 2.5 ml/min, and when the krypton gas flow was reduced to zero, the penetration column was heated to 353 K. The exit gas from the penetration column was monitored using mass spectrometry

The cumulative purity *p* of Xe obtained during the resolution process is calculated using the following equation:

Where *n*Xe and *n*Kr are calculated from the desorption curve with the following equations:

where *n*i is the capacity of the gas component i, F is the total outlet flow rate calculated from the argon flow rate and the concentration of the various gas components, Ci is the concentration of the ith gas in the outlet mixture, t1 is the initial gas detection time, and t2 is the final gas detection time.

# Section 7. References

(1) Xiong, S.; Liu, Q.; Wang, Q.; Li, W.; Tang, Y.; Wang, X.; Hu, S.; Chen, B. A flexible zinc tetrazolate framework exhibiting breathing behaviour on xenon adsorption and selective adsorption of xenon over other noble gases. *Journal of Materials Chemistry A* **2015**, *3* (20), 10747-10752, 10.1039/C5TA00460H. DOI: 10.1039/C5TA00460H.

(2) Wang, H.; Zeng, X.; Cao, D. A DIH-based equation for separation of CO2–CH4 in metal–organic frameworks and covalent–organic materials. *Journal of Materials Chemistry A* **2014**, *2* (29), 11341-11348, 10.1039/C3TA14973K. DOI: 10.1039/C3TA14973K.

(3) Yuan, M.; Wang, X.; Chen, L.; Zhang, M.; He, L.; Ma, F.; Liu, W.; Wang, S. Tailoring Pore Structure and Morphologies in Covalent Organic Frameworks for Xe/Kr Capture and Separation. *Chemical Research in Chinese Universities* **2021**, *37* (3), 679-685. DOI: 10.1007/s40242-021-1064-z.

(4) Jia, Z.; Yan, Z.; Zhang, J.; Zou, Y.; Qi, Y.; Li, X.; Li, Y.; Guo, X.; Yang, C.; Ma, L. Pore Size Control via Multiple-Site Alkylation to Homogenize Sub-Nanoporous Covalent Organic Frameworks for Efficient Sieving of Xenon/Krypton. *ACS Applied Materials & Interfaces* **2021**, *13* (1), 1127-1134. DOI: 10.1021/acsami.0c14610.

(5) Zhang, W.; Li, Y.; Wu, Y.; Huang, W.; Wang, S.; Fu, Y.; Ma, W.; Li, X.; Ma, H. Polypyrene Porous Organic Framework for Efficiently Capturing Electron Specialty Gases. *ACS Applied Materials & Interfaces* **2023**, *15* (24), 29468-29477. DOI: 10.1021/acsami.3c05398.

(6) Luo, Y.; Yan, Z.; Wang, F.; Wang, Z.; Zhou, M.; Jin, Y.; Wang, Y.; Xia, C. 3D ultra-micropore organic polymers with fixed group and thieno[3,2-b]thiophene to enhance adsorption and separation of Xe/Kr. *Separation and Purification Technology* **2024**, *330*, 125460. DOI: https://doi.org/10.1016/j.seppur.2023.125460.

(7) Wang, Q.; Meng, Z.; Li, J.; Peng, S.; Xiang, Z. High retention volume covalent organic polymer for xenon capture: Dynamic separation of Xe and Kr. *Green Energy & Environment* **2022**, *7* (5), 948-956. DOI: https://doi.org/10.1016/j.gee.2020.12.010.

(8) Chakraborty, D.; Nandi, S.; Sinnwell, M. A.; Liu, J.; Kushwaha, R.; Thallapally, P. K.; Vaidhyanathan, R. Hyper-Cross-linked Porous Organic Frameworks with Ultramicropores for Selective Xenon Capture. *ACS Applied Materials & Interfaces* **2019**, *11* (14), 13279-13284. DOI: 10.1021/acsami.9b01619.

(9) Yan, Z.; Luo, Y.; Chen, B.; Wang, F.; Chen, L.; Wang, Z.; Zhao, P.; Kang, J.; Fu, Z.; Jin, Y.; et al. Thiophene-based conjugated ultra-micropore rigid polymers for selective xenon capture. *Chemical Engineering Journal* **2023**, *453*, 139934. DOI: https://doi.org/10.1016/j.cej.2022.139934.

(10) Li, H.; Wang, G.; Haw, K.-G.; Li, J.; Rong, H.; Ren, H.; Deng, Y.; Yuan, Y.; Zhu, G.; Zou, X. Ultramicroporous organic materials for selective separation of xenon from krypton. *Microporous and Mesoporous Materials* **2020**, *305*, 110390. DOI: https://doi.org/10.1016/j.micromeso.2020.110390.

(11) Li, J.; Huang, L.; Zou, X.; Zheng, A.; Li, H.; Rong, H.; Zhu, G. Porous organic materials with ultra-small pores and sulfonic functionality for xenon capture with exceptional selectivity. *Journal of Materials Chemistry A* **2018**, *6* (24), 11163-11168, 10.1039/C8TA03991G. DOI: 10.1039/C8TA03991G.

(12) Li, Z.; Xiong, S.; Shao, L.; Zhao, X.; Huang, Q.; Huang, D.; Yue, G. Simple biphenyl derived porous aromatic frameworks with attractive xenon/krypton separation. *Chemical Physics Letters* **2023**, *820*, 140462. DOI: https://doi.org/10.1016/j.cplett.2023.140462.

(13) Zhang, W.; Li, Y.; Wang, S.; Wu, Y.; Chen, S.; Fu, Y.; Ma, W.; Zhang, Z.; Ma, H. Fluorine-Induced Electric Field Gradient in 3D Porous Aromatic Frameworks for Highly Efficient Capture of Xe and F-Gases. *ACS Applied Materials & Interfaces* **2022**, *14* (30), 35126-35137. DOI: 10.1021/acsami.2c10050.

(14) Chen, F.; Zheng, F.; Huang, X.; Chu, Z.; Sun, H.; Yang, L.; Yang, Q.; Zhang, Z.; Ren, Q.; Bao, Z. The First Kr-Selective Carbon Molecular Sieve for Inverse Adsorption of Krypton Over Xenon at Ambient Temperature. *Advanced Materials* **2025**, *37* (4), 2409474. DOI: https://doi.org/10.1002/adma.202409474.

(15) Huang, J.; Li, Y.; Zhang, H.; Yuan, Z.; Xiang, S.; Chen, B.; Zhang, Z. A Microporous Hydrogen-Bonded Organic Framework Based on Hydrogen-Bonding Tetramers for Efficient Xe/Kr Separation. *Angewandte Chemie International Edition* **2023**, *62* (52), e202315987. DOI: https://doi.org/10.1002/anie.202315987.

(16) Yuan, Z.; Chen, L.; Zhou, X.; Li, L.; Li, Y.; Yang, Y.; Zhou, Z.; Chen, Y.; Xiang, S.; Chen, B.; et al. Hydrogen-bonded organic framework with tailored pores prepared by enlarging the core size for high-performance Xe/Kr separation. *Journal of Materials Chemistry A* **2023**, *11* (40), 21857-21863, 10.1039/D3TA04738E. DOI: 10.1039/D3TA04738E.

(17) Lee, W.-G.; Yoon, T.-U.; Bae, Y.-S.; Kim, K. S.; Baek, S. B. Selective separation of Xe/Kr and adsorption of water in a microporous hydrogen-bonded organic framework. *RSC Advances* **2019**, *9* (63), 36808-36814, 10.1039/C9RA08184D. DOI: 10.1039/C9RA08184D.

(18) Gong, L.; Ye, Y.; Liu, Y.; Li, Y.; Bao, Z.; Xiang, S.; Zhang, Z.; Chen, B. A Microporous Hydrogen-Bonded Organic Framework for Efficient Xe/Kr Separation. *ACS Applied Materials & Interfaces* **2022**, *14* (17), 19623-19628. DOI: 10.1021/acsami.2c04746.

(19) Guo, F.-A.; Zhou, K.; Liu, J.; Wang, H.; Li, J. Robust Hydrogen-Bonded Organic Framework with Four-Fold Interpenetration for Adsorptive Separation of C2H6/C2H4 and Xe/Kr. *Precision Chemistry* **2023**, *1* (9), 524-529. DOI: 10.1021/prechem.3c00040.

(20) Xie, Y.; Ding, X.; Wang, J.; Ye, G. Hydrogen-Bonding Assembly Meets Anion Coordination Chemistry: Framework Shaping and Polarity Tuning for Xenon/Krypton Separation. *Angewandte Chemie International Edition* **2023**, *62* (49), e202313951. DOI: https://doi.org/10.1002/anie.202313951.

(21) Liu, Y.; Wu, H.; Guo, L.; Zhou, W.; Zhang, Z.; Yang, Q.; Yang, Y.; Ren, Q.; Bao, Z. Hydrogen-Bonded Metal–Nucleobase Frameworks for Efficient Separation of Xenon and Krypton. *Angewandte Chemie International Edition* **2022**, *61* (11), e202117609. DOI: https://doi.org/10.1002/anie.202117609.

(22) Xiong, S.; Gong, Y.; Hu, S.; Wu, X.; Li, W.; He, Y.; Chen, B.; Wang, X. A microporous metal–organic framework with commensurate adsorption and highly selective separation of xenon. *Journal of Materials Chemistry A* **2018**, *6* (11), 4752-4758, 10.1039/C7TA11321H. DOI: 10.1039/C7TA11321H.

(23) Zhou, J.; Ke, T.; Steinke, F.; Stock, N.; Zhang, Z.; Bao, Z.; He, X.; Ren, Q.; Yang, Q. Tunable Confined Aliphatic Pore Environment in Robust Metal–Organic Frameworks for Efficient Separation of Gases with a Similar Structure. *Journal of the American Chemical Society* **2022**, *144* (31), 14322-14329. DOI: 10.1021/jacs.2c05448.

(24) Pei, J.; Gu, X.-W.; Liang, C.-C.; Chen, B.; Li, B.; Qian, G. Robust and Radiation-Resistant Hofmann-Type Metal–Organic Frameworks for Record Xenon/Krypton Separation. *Journal of the American Chemical Society* **2022**, *144* (7), 3200-3209. DOI: 10.1021/jacs.1c12873.

(25) Li, L.; Guo, L.; Zhang, Z.; Yang, Q.; Yang, Y.; Bao, Z.; Ren, Q.; Li, J. A Robust Squarate-Based Metal–Organic Framework Demonstrates Record-High Affinity and Selectivity for Xenon over Krypton. *Journal of the American Chemical Society* **2019**, *141* (23), 9358-9364. DOI: 10.1021/jacs.9b03422.

(26) Zheng, F.; Guo, L.; Chen, R.; Chen, L.; Zhang, Z.; Yang, Q.; Yang, Y.; Su, B.; Ren, Q.; Bao, Z. Shell-like Xenon Nano-Traps within Angular Anion-Pillared Layered Porous Materials for Boosting Xe/Kr Separation. *Angewandte Chemie International Edition* **2022**, *61* (20), e202116686. DOI: https://doi.org/10.1002/anie.202116686.

(27) Zhu, X.; Ke, T.; Han, P.; Zhang, Z.; Bao, Z.; Yang, Y.; Ren, Q.; Yang, Q. Pore Chemistry and Architecture Control in Anionic Functional Ultramicroporous Materials for Record Dense Packing of Xenon. *Journal of the American Chemical Society* **2024**, *146* (36), 24956-24965. DOI: 10.1021/jacs.4c06354.
