# Supplementary material for: Thermoresponsive and Xenon Triggered Gate-opening in Flexible Three-dimensional Covalent Organic Framework for Xenon/Krypton Separation
Source: Research Square preprint supplement (doi:10.21203/rs.3.rs-7885074/v1), 2025-10-24
Supplement: Supplementary file 2 [file e9661aba3b94d87d63e4c3d5.xlsx]

## Sheet: Figure 2a
	Simulate		Simulate		Experiment		Difference		Background		Observed Reflections		Systematic Absences
5	0	5	24197.6	5	23727.1	5	-59912.2	5	24195.8	7.63001	-1209.8	5.35897	-1209.8
5.02	0	5.02	23929.2	5.02	23630.7	5.02	-59740.2	5.02	23927.4	7.64928	-1209.8	5.37259	-1209.8
5.04	0	5.04	23685.6	5.04	23008.8	5.04	-60118.4	5.04	23683.7	10.844	-1209.8	9.63364	-1209.8
5.06	0	5.06	23465	5.06	23131.9	5.06	-59774.8	5.06	23463.1	10.8713	-1209.8	9.65791	-1209.8
5.08	0	5.08	23265.9	5.08	22011.6	5.08	-60695.9	5.08	23264	11.0703	-1209.8	12.1405	-1209.8
5.1	0	5.1	23086.7	5.1	23613.3	5.1	-58915	5.1	23084.7	11.0981	-1209.8	12.1405	-1209.8
5.12	0	5.12	22925.9	5.12	22690.8	5.12	-59676.8	5.12	22923.9	15.3981	-1209.8	12.171	-1209.8
5.14	0	5.14	22782.2	5.14	23035.6	5.14	-59188.3	5.14	22780.2	15.4368	-1209.8	12.171	-1209.8
5.16	0	5.16	22654.3	5.16	22856.6	5.16	-59239.4	5.16	22652.2	15.5594	-1209.8	12.3434	-1209.8
5.18	0	5.18	22540.9	5.18	22863.6	5.18	-59119	5.18	22538.8	15.5594	-1209.8	12.3744	-1209.8
5.2	0	5.2	22440.8	5.2	23016.7	5.2	-58865.8	5.2	22438.7	15.5985	-1209.8	14.5649	-1209.8
5.22	0	5.22	22353.1	5.22	22356.4	5.22	-59438.3	5.22	22350.9	15.5985	-1209.8	14.6015	-1209.8
5.24	0	5.24	22276.5	5.24	22073.9	5.24	-59644.3	5.24	22274.4	17.2377	-1209.8	16.3432	-1209.8
5.26	0	5.26	22210.2	5.26	22593.3	5.26	-59058.6	5.26	22208	17.2377	-1209.8	16.3843	-1209.8
5.28	0	5.28	22153.2	5.28	21573	5.28	-60021.9	5.28	22151	17.2811	-1209.8	18.2273	-1209.8
5.3	0	5.3	22104.7	5.3	22406.2	5.3	-59140.2	5.3	22102.4	17.2811	-1209.8	18.2732	-1209.8
5.32	0	5.32	22063.8	5.32	23617	5.32	-57888.4	5.32	22061.4	19.0359	-1209.8	19.6852	-1209.8
5.34	0	5.34	22029.7	5.34	22227.2	5.34	-59244.2	5.34	22027.3	19.0838	-1209.8	19.6852	-1209.8
5.36	0	5.36	22001.7	5.36	22340.6	5.36	-59102.8	5.36	21999.3	19.4276	-1209.8	19.7348	-1209.8
5.38	0	5.38	21979.2	5.38	23191.3	5.38	-58229.6	5.38	21976.8	19.4765	-1209.8	19.7348	-1209.8
5.4	0	5.4	21961.6	5.4	22667.1	5.4	-58736.1	5.4	21959.1	20.925	-1209.8	19.8125	-1209.8
5.42	0	5.42	21948.2	5.42	22744	5.42	-58645.9	5.42	21945.6	20.9777	-1209.8	19.8125	-1209.8
5.44	0	5.44	21938.4	5.44	22260.4	5.44	-59119.7	5.44	21935.8	21.8688	-1209.8	19.8624	-1209.8
5.46	0	5.46	21931.8	5.46	22333.2	5.46	-59040.3	5.46	21929.2	21.9239	-1209.8	19.8624	-1209.8
5.48	0	5.48	21928	5.48	22376.3	5.48	-58993.3	5.48	21925.3	21.9839	-1209.8	20.1897	-1209.8
5.5	0	5.5	21926.3	5.5	21526.8	5.5	-59841.2	5.5	21923.6	21.9839	-1209.8	20.2405	-1209.8
5.52	0	5.52	21926.5	5.52	22043.3	5.52	-59324.9	5.52	21923.7	22.0393	-1209.8	22.5515	-1209.8
5.54	0	5.54	21928.2	5.54	21572.8	5.54	-59797	5.54	21925.3	22.0393	-1209.8	22.5515	-1209.8
5.56	0	5.56	21931	5.56	21906.4	5.56	-59466.2	5.56	21928.1	22.3258	-1209.8	22.6083	-1209.8
5.58	0	5.58	21934.5	5.58	20929.2	5.58	-60447	5.58	21931.6	22.382	-1209.8	22.6083	-1209.8
5.6	0	5.6	21938.6	5.6	22642.3	5.6	-58737.9	5.6	21935.6	23.215	-1209.8	22.9955	-1209.8
5.62	0	5.62	21942.9	5.62	21450.3	5.62	-59934.2	5.62	21939.8	23.2735	-1209.8	22.9955	-1209.8
5.64	0	5.64	21947.1	5.64	22242.7	5.64	-59146.1	5.64	21944	24.4905	-1209.8	23.0535	-1209.8
5.66	0	5.66	21951.1	5.66	22381.4	5.66	-59011.4	5.66	21947.9	24.4905	-1209.8	23.0535	-1209.8
5.68	0	5.68	21954.7	5.68	22011.6	5.68	-59384.8	5.68	21951.4	24.5524	-1209.8	23.9668	-1209.8
5.7	0	5.7	21957.7	5.7	22806.5	5.7	-58592.8	5.7	21954.3	24.5524	-1209.8	24.0273	-1209.8
5.72	0	5.72	21959.8	5.72	22253.4	5.72	-59148	5.72	21956.4	24.5939	-1209.8	25.2062	-1209.8
5.74	0	5.74	21961	5.74	22077.8	5.74	-59324.9	5.74	21957.6	24.5939	-1209.8	25.2699	-1209.8
5.76	0	5.76	21961.2	5.76	21671.7	5.76	-59731.1	5.76	21957.7	24.656	-1209.8	25.5069	-1209.8
5.78	0	5.78	21960.2	5.78	21704.6	5.78	-59697.2	5.78	21956.6	24.656	-1209.8	25.5713	-1209.8
5.8	0	5.8	21957.9	5.8	21469.2	5.8	-59930.4	5.8	21954.2	24.9016	-1209.8	26.3905	-1209.8
5.82	0	5.82	21954.3	5.82	21495.9	5.82	-59900.1	5.82	21950.6	24.9645	-1209.8	26.3905	-1209.8
5.84	0	5.84	21949.3	5.84	21865.9	5.84	-59525.1	5.84	21945.5	26.099	-1209.8	26.4572	-1209.8
5.86	0	5.86	21942.9	5.86	21499.2	5.86	-59885.3	5.86	21938.9	26.099	-1209.8	26.4572	-1209.8
5.88	0	5.88	21934.9	5.88	21721.4	5.88	-59655.1	5.88	21930.8	26.1649	-1209.8	27.4339	-1209.8
5.9	0	5.9	21925.4	5.9	20997.7	5.9	-60369.3	5.9	21921.2	26.1649	-1209.8	27.4339	-1209.8
5.92	0	5.92	21914.3	5.92	22905	5.92	-58450.9	5.92	21910.1	27.9877	-1209.8	27.4339	-1209.8
5.94	0	5.94	21901.6	5.94	22430.6	5.94	-58912.7	5.94	21897.3	27.9877	-1209.8	27.5034	-1209.8
5.96	0	5.96	21887.4	5.96	22350.1	5.96	-58979	5.96	21883	28.0586	-1209.8	27.5034	-1209.8
5.98	0	5.98	21871.6	5.98	21812.7	5.98	-59500.6	5.98	21867.1	28.0586	-1209.8	27.5034	-1209.8
6	0	6	21854.3	6	20869.3	6	-60426.6	6	21849.6	29.1537	-1209.8	27.8039	-1209.8
6.02	0	6.02	21835.4	6.02	21740.1	6.02	-59536.9	6.02	21830.6	29.1537	-1209.8	27.8039	-1209.8
6.04	0	6.04	21815	6.04	21588	6.04	-59668.6	6.04	21810.1	29.1537	-1209.8	27.8743	-1209.8
6.06	0	6.06	21793.2	6.06	21434.5	6.06	-59800.3	6.06	21788.2	29.2276	-1209.8	27.8743	-1209.8
6.08	0	6.08	21769.9	6.08	21590.1	6.08	-59621.4	6.08	21764.8	29.2276	-1209.8	29.3287	-1209.8
6.1	0	6.1	21745.2	6.1	21510.6	6.1	-59676.3	6.1	21739.9	29.2276	-1209.8	29.4031	-1209.8
6.12	0	6.12	21719.2	6.12	21046	6.12	-60114.9	6.12	21713.8	29.4165	-1209.8	29.5909	-1209.8
6.14	0	6.14	21691.9	6.14	20609.7	6.14	-60523.8	6.14	21686.3	29.4911	-1209.8	29.5909	-1209.8
6.16	0	6.16	21663.3	6.16	21733.2	6.16	-59371.8	6.16	21657.6	29.8498	-1209.8	29.666	-1209.8
6.18	0	6.18	21633.6	6.18	20722.9	6.18	-60352.3	6.18	21627.7	29.9255	-1209.8	29.666	-1209.8
6.2	0	6.2	21602.7	6.2	20723.3	6.2	-60321.1	6.2	21596.7	30.4475	-1209.8	29.6776	-1209.8
6.22	0	6.22	21570.8	6.22	20769.9	6.22	-60242.6	6.22	21564.7	30.5249	-1209.8	29.6776	-1209.8
6.24	0	6.24	21537.9	6.24	20594.9	6.24	-60384.7	6.24	21531.6	31.1177	-1209.8	29.7529	-1209.8
6.26	0	6.26	21504.2	6.26	21107.9	6.26	-59837.9	6.26	21497.6	31.1968	-1209.8	29.7529	-1209.8
6.28	0	6.28	21469.5	6.28	20710.1	6.28	-60201.1	6.28	21462.8	31.2004	-1209.8	29.9361	-1209.8
6.3	0	6.3	21434.1	6.3	21794.8	6.3	-59081	6.3	21427.2	31.2004	-1209.8	29.9361	-1209.8
6.32	0	6.32	21398	6.32	20212	6.32	-60627.7	6.32	21390.9	31.2797	-1209.8	30.0121	-1209.8
6.34	0	6.34	21361.3	6.34	21632	6.34	-59171	6.34	21353.9	31.2797	-1209.8	30.0121	-1209.8
6.36	0	6.36	21324	6.36	21376	6.36	-59389.7	6.36	21316.4	31.4474	-1209.8	30.3625	-1209.8
6.38	0	6.38	21286.2	6.38	20627.3	6.38	-60100.6	6.38	21278.4	31.4474	-1209.8	30.4396	-1209.8
6.4	0	6.4	21248.1	6.4	20962.9	6.4	-59726.8	6.4	21240	31.5274	-1209.8	31.3649	-1209.8
6.42	0	6.42	21209.6	6.42	20620.1	6.42	-60031.1	6.42	21201.3	31.5274	-1209.8	31.4447	-1209.8
6.44	0	6.44	21170.8	6.44	20464.7	6.44	-60147.8	6.44	21162.3	31.8553	-1209.8	32.6581	-1209.8
6.46	0	6.46	21131.9	6.46	21041.1	6.46	-59532.4	6.46	21123	31.8553	-1209.8	32.7413	-1209.8
6.48	0	6.48	21092.9	6.48	21006.9	6.48	-59527.6	6.48	21083.7	31.9363	-1209.8	33.2869	-1209.8
6.5	0	6.5	21053.8	6.5	20459.9	6.5	-60035.6	6.5	21044.3	31.9363	-1209.8	33.3717	-1209.8
6.52	0	6.52	21014.8	6.52	21376.8	6.52	-59079.7	6.52	21005	32.0984	-1209.8	33.5206	-1209.8
6.54	0	6.54	20975.8	6.54	21134.8	6.54	-59282.7	6.54	20965.7	32.0984	-1209.8	33.5206	-1209.8
6.56	0	6.56	20937.1	6.56	19601.5	6.56	-60777.3	6.56	20926.6	32.1802	-1209.8	33.598	-1209.8
6.58	0	6.58	20898.6	6.58	20763.8	6.58	-59576.5	6.58	20887.7	32.1802	-1209.8	33.598	-1209.8
6.6	0	6.6	20860.4	6.6	21161.5	6.6	-59140.6	6.6	20849.1	33.0527	-1209.8	33.6061	-1209.8
6.62	0	6.62	20822.6	6.62	20410.7	6.62	-59853.6	6.62	20810.9	33.137	-1209.8	33.6061	-1209.8
6.64	0	6.64	20785.3	6.64	21771	6.64	-58456	6.64	20773.1	33.7518	-1209.8	33.6837	-1209.8
6.66	0	6.66	20748.5	6.66	21310.3	6.66	-58879.9	6.66	20735.8	33.8379	-1209.8	33.6837	-1209.8
6.68	0	6.68	20712.2	6.68	21424.7	6.68	-58729.1	6.68	20699	34.2874	-1209.8	33.8291	-1209.8
6.7	0	6.7	20676.6	6.7	21308.3	6.7	-58810	6.7	20662.9	34.2874	-1209.8	33.8291	-1209.8
6.72	0	6.72	20641.6	6.72	21708.4	6.72	-58374.9	6.72	20627.3	34.375	-1209.8	33.8291	-1209.8
6.74	0	6.74	20607.4	6.74	20879.7	6.74	-59169.4	6.74	20592.5	34.375	-1209.8	33.9154	-1209.8
6.76	0	6.76	20574	6.76	20608.7	6.76	-59407	6.76	20558.5	34.8904	-1209.8	33.9154	-1209.8
6.78	0	6.78	20541.5	6.78	21303.8	6.78	-58679.4	6.78	20525.3	34.8904	-1209.8	33.9154	-1209.8
6.8	0	6.8	20509.9	6.8	20209.1	6.8	-59742.5	6.8	20492.9	34.965	-1209.8	34.2111	-1209.8
6.82	0	6.82	20479.2	6.82	20575.7	6.82	-59345.2	6.82	20461.4	34.965	-1209.8	34.2111	-1209.8
6.84	0	6.84	20449.6	6.84	21371.7	6.84	-58519.6	6.84	20430.9	34.9796	-1209.8	34.2985	-1209.8
6.86	0	6.86	20421	6.86	21527.6	6.86	-58335	6.86	20401.4	34.9796	-1209.8	34.2985	-1209.8
6.88	0	6.88	20393.5	6.88	20072.2	6.88	-59763	6.88	20373	35.0544	-1209.8	34.5147	-1209.8
6.9	0	6.9	20367.2	6.9	20749.1	6.9	-59059.8	6.9	20345.6	35.0544	-1209.8	34.6029	-1209.8
6.92	0	6.92	20342.1	6.92	20635.8	6.92	-59147.9	6.92	20319.3	35.557	-1209.8	35.3364	-1209.8
6.94	0	6.94	20318.2	6.94	20842.7	6.94	-58917.1	6.94	20294.2	35.557	-1209.8	35.3364	-1209.8
6.96	0	6.96	20295.6	6.96	20279.1	6.96	-59458.2	6.96	20270.2	35.648	-1209.8	35.4268	-1209.8
6.98	0	6.98	20274.4	6.98	20360.1	6.98	-59356	6.98	20247.5	35.648	-1209.8	35.4268	-1209.8
7	0	7	20254.7	7	20642.5	7	-59053.8	7	20225.9	36.717	-1209.8	35.6308	-1209.8
7.02	0	7.02	20236.4	7.02	20681	7.02	-58997.1	7.02	20205.7	36.717	-1209.8	35.6308	-1209.8
7.04	0	7.04	20219.6	7.04	20155.6	7.04	-59505.7	7.04	20186.7	36.8111	-1209.8	35.7219	-1209.8
7.06	0	7.06	20204.5	7.06	20774.1	7.06	-58872	7.06	20169.1	36.8111	-1209.8	35.7219	-1209.8
7.08	0	7.08	20191.1	7.08	20779	7.08	-58853.8	7.08	20152.7	36.9306	-1209.8	36.286	-1209.8
7.1	0	7.1	20179.5	7.1	20692.8	7.1	-58928.3	7.1	20137.7	37.0253	-1209.8	36.286	-1209.8
7.12	0	7.12	20169.8	7.12	21078.8	7.12	-58532.7	7.12	20124.1	37.2844	-1209.8	36.379	-1209.8
7.14	0	7.14	20162.7	7.14	21351.7	7.14	-58252.6	7.14	20111.9	37.2844	-1209.8	36.379	-1209.8
7.16	0	7.16	20161.9	7.16	20787.6	7.16	-58816	7.16	20101	37.38	-1209.8	36.8592	-1209.8
7.18	0	7.18	20169.2	7.18	21025.1	7.18	-58585.7	7.18	20091.6	37.38	-1209.8	36.9537	-1209.8
7.2	0	7.2	20185.6	7.2	20783.6	7.2	-58843.7	7.2	20083.5	37.7753	-1209.8	37.0728	-1209.8
7.22	0	7.22	20210.4	7.22	20883	7.22	-58769.1	7.22	20076.9	37.7753	-1209.8	37.0728	-1209.8
7.24	0.000805776	7.24	20243.1	7.24	21100.4	7.24	-58584.3	7.24	20071.7	37.8723	-1209.8	37.1679	-1209.8
7.26	0.00474	7.26	20282.9	7.26	20715	7.26	-59009.6	7.26	20067.9	37.8723	-1209.8	37.1679	-1209.8
7.28	0.00814	7.28	20329.2	7.28	21114.8	7.28	-58656.2	7.28	20065.6	38.3984	-1209.8	37.7053	-1209.8
7.3	0.00956	7.3	20381.4	7.3	21042.5	7.3	-58780.6	7.3	20064.7	38.3984	-1209.8	37.8021	-1209.8
7.32	0.01065	7.32	20438.8	7.32	21081.9	7.32	-58798.6	7.32	20065.2	38.4971	-1209.8	38.5352	-1209.8
7.34	0.01193	7.34	20500.6	7.34	20445.3	7.34	-59497	7.34	20067.1	38.4971	-1209.8	38.5352	-1209.8
7.36	0.01346	7.36	20566.1	7.36	20773.2	7.36	-59234.5	7.36	20070.5	38.6039	-1209.8	38.6342	-1209.8
7.38	0.01531	7.38	20634.3	7.38	21492.9	7.38	-58583.1	7.38	20075.3	38.7032	-1209.8	38.6342	-1209.8
7.4	0.01757	7.4	20704.5	7.4	21257.5	7.4	-58888.6	7.4	20081.4	39.148	-1209.8	38.7407	-1209.8
7.42	0.02036	7.42	20775.5	7.42	21632.6	7.42	-58584.5	7.42	20089	39.148	-1209.8	38.8403	-1209.8
7.44	0.02388	7.44	20846.2	7.44	20578.2	7.44	-59709.6	7.44	20098	39.148	-1209.8	39.0124	-1209.8
7.46	0.02839	7.46	20915.3	7.46	21139.9	7.46	-59217	7.46	20108.4	39.2488	-1209.8	39.0124	-1209.8
7.48	0.0343	7.48	20981.4	7.48	21259.3	7.48	-59163.8	7.48	20120.1	39.2488	-1209.8	39.1128	-1209.8
7.5	0.04227	7.5	21043	7.5	20617.3	7.5	-59867.3	7.5	20133.2	39.2488	-1209.8	39.1128	-1209.8
7.52	0.05336	7.52	21100	7.52	20768.3	7.52	-59773.4	7.52	20147.6	39.4167	-1209.8	39.818	-1209.8
7.54	0.06943	7.54	21154.2	7.54	21105.1	7.54	-59490.7	7.54	20163.4	39.5182	-1209.8	39.9207	-1209.8
7.56	0.09396	7.56	21206	7.56	21587	7.56	-59060.6	7.56	20180.4	39.9519	-1209.8
7.58	0.13401	7.58	21254.5	7.58	21599.7	7.58	-59096.5	7.58	20198.8	39.9519	-1209.8
7.6	0.20694	7.6	21298.4	7.6	20435.6	7.6	-60304.4	7.6	20218.4	40.0549	-1209.8
7.62	0.39917	7.62	21336.4	7.62	21273.2	7.62	-59504.9	7.62	20239.3	40.0549	-1209.8
7.64	1.28173	7.64	21367.9	7.64	21263.3	7.64	-59546.2	7.64	20261.5
7.66	4.04097	7.66	21392.5	7.66	20474.7	7.66	-60359.5	7.66	20284.8
7.68	6.13034	7.68	21410.8	7.68	21677.1	7.68	-59175.3	7.68	20309.3
7.7	3.97133	7.7	21423.5	7.7	21447.7	7.7	-59417.4	7.7	20335.1
7.72	1.36075	7.72	21431.9	7.72	21205.6	7.72	-59668	7.72	20361.9
7.74	0.42765	7.74	21437.4	7.74	21672.8	7.74	-59206.3	7.74	20389.9
7.76	0.21163	7.76	21441.3	7.76	21734.1	7.76	-59149	7.76	20419
7.78	0.13564	7.78	21445	7.78	20513.9	7.78	-60372.8	7.78	20449.1
7.8	0.09483	7.8	21449.4	7.8	22510.8	7.8	-58380.2	7.8	20480.3
7.82	0.06996	7.82	21455.4	7.82	21016.3	7.82	-59880.8	7.82	20512.5
7.84	0.0537	7.84	21463.7	7.84	21071.9	7.84	-59833.4	7.84	20545.8
7.86	0.0425	7.86	21474.7	7.86	22025.9	7.86	-58890.5	7.86	20580
7.88	0.03447	7.88	21488.8	7.88	20757.4	7.88	-60173	7.88	20615.1
7.9	0.02851	7.9	21506.3	7.9	21965.9	7.9	-58982	7.9	20651.1
7.92	0.02397	7.92	21527.2	7.92	21956.9	7.92	-59012	7.92	20688.1
7.94	0.02043	7.94	21551.6	7.94	21707.9	7.94	-59285.3	7.94	20725.8
7.96	0.01763	7.96	21579.4	7.96	20399.2	7.96	-60621.8	7.96	20764.5
7.98	0.01536	7.98	21610.5	7.98	21765.1	7.98	-59287	7.98	20803.9
8	0.0135	8	21644.8	8	21857.2	8	-59229.3	8	20844.1
8.02	0.01196	8.02	21682	8.02	21783.5	8.02	-59340.1	8.02	20885
8.04	0.01067	8.04	21722.1	8.04	21667.7	8.04	-59496	8.04	20926.6
8.06	0.00958	8.06	21764.6	8.06	21583	8.06	-59623.3	8.06	20968.9
8.08	0.00841	8.08	21809.5	8.08	21628.1	8.08	-59623.1	8.08	21011.9
8.1	0.00466	8.1	21856.6	8.1	22211	8.1	-59087.2	8.1	21055.5
8.12	0.000941013	8.12	21905.5	8.12	21729.1	8.12	-59618.1	8.12	21099.7
8.14	0	8.14	21956.2	8.14	21544.7	8.14	-59853.1	8.14	21144.5
8.16	0	8.16	22008.4	8.16	21401.8	8.16	-60048.3	8.16	21189.7
8.18	0	8.18	22062	8.18	21610.3	8.18	-59893.4	8.18	21235.5
8.2	0	8.2	22116.9	8.2	20092.7	8.2	-61465.9	8.2	21281.8
8.22	0	8.22	22173	8.22	22500.6	8.22	-59114	8.22	21328.5
8.24	0	8.24	22230.1	8.24	22040.5	8.24	-59631.2	8.24	21375.7
8.26	0	8.26	22288.2	8.26	21431.8	8.26	-60298.1	8.26	21423.2
8.28	0	8.28	22347.1	8.28	21826.8	8.28	-59962	8.28	21471.1
8.3	0	8.3	22407	8.3	23224.5	8.3	-58624.1	8.3	21519.3
8.32	0	8.32	22467.6	8.32	20401.7	8.32	-61507.5	8.32	21567.8
8.34	0	8.34	22528.9	8.34	21724.6	8.34	-60246	8.34	21616.6
8.36	0	8.36	22590.9	8.36	21667.7	8.36	-60364.9	8.36	21665.6
8.38	0	8.38	22653.6	8.38	22402.7	8.38	-59692.6	8.38	21714.9
8.4	0	8.4	22717	8.4	21550.3	8.4	-60608.4	8.4	21764.3
8.42	0	8.42	22780.9	8.42	21774.1	8.42	-60448.5	8.42	21813.9
8.44	0	8.44	22845.5	8.44	21871.6	8.44	-60415.5	8.44	21863.6
8.46	0	8.46	22910.6	8.46	22882	8.46	-59470.2	8.46	21913.5
8.48	0	8.48	22976.2	8.48	23627.7	8.48	-58790.2	8.48	21963.4
8.5	0	8.5	23042.4	8.5	22301.8	8.5	-60182.3	8.5	22013.4
8.52	0	8.52	23109.1	8.52	22532.6	8.52	-60018.2	8.52	22063.5
8.54	0	8.54	23176.3	8.54	22331	8.54	-60287	8.54	22113.5
8.56	0	8.56	23244	8.56	22448.4	8.56	-60237.2	8.56	22163.5
8.58	0	8.58	23312.1	8.58	23137.4	8.58	-59616.4	8.58	22213.5
8.6	0	8.6	23380.7	8.6	23061.4	8.6	-59761	8.6	22263.5
8.62	0	8.62	23449.8	8.62	22254.5	8.62	-60636.9	8.62	22313.3
8.64	0	8.64	23519.3	8.64	22989.8	8.64	-59971.2	8.64	22363
8.66	0	8.66	23589.3	8.66	23962.8	8.66	-59068.1	8.66	22412.6
8.68	0	8.68	23659.7	8.68	22969.9	8.68	-60131.4	8.68	22462.1
8.7	0	8.7	23730.5	8.7	22778.4	8.7	-60393.8	8.7	22511.3
8.72	0	8.72	23801.8	8.72	23244.8	8.72	-59998.8	8.72	22560.4
8.74	0	8.74	23873.6	8.74	23310.8	8.74	-60004.4	8.74	22609.3
8.76	0	8.76	23945.8	8.76	23521.8	8.76	-59865.6	8.76	22657.9
8.78	0	8.78	24018.4	8.78	24410.5	8.78	-59049.6	8.78	22706.3
8.8	0	8.8	24091.5	8.8	24232.5	8.8	-59300.6	8.8	22754.3
8.82	0	8.82	24165	8.82	23191.7	8.82	-60415	8.82	22802.1
8.84	0	8.84	24239.1	8.84	24727.2	8.84	-58953.6	8.84	22849.6
8.86	0	8.86	24313.6	8.86	24444	8.86	-59311.2	8.86	22896.8
8.88	0	8.88	24388.6	8.88	24214	8.88	-59616.3	8.88	22943.6
8.9	0	8.9	24464.1	8.9	24608	8.9	-59297.8	8.9	22990.1
8.92	0	8.92	24540.2	8.92	24278.5	8.92	-59703.3	8.92	23036.2
8.94	0	8.94	24616.8	8.94	24742.2	8.94	-59316.3	8.94	23081.8
8.96	0	8.96	24694	8.96	24459.4	8.96	-59676.3	8.96	23127.1
8.98	0	8.98	24771.9	8.98	25001.9	8.98	-59211.7	8.98	23172
9	0	9	24850.3	9	25105	9	-59187	9	23216.4
9.02	0	9.02	24929.5	9.02	24477	9.02	-59894.2	9.02	23260.4
9.04	0	9.04	25009.3	9.04	24320.1	9.04	-60130.9	9.04	23303.9
9.06	0	9.06	25089.9	9.06	25686.6	9.06	-58844.9	9.06	23347
9.08	0	9.08	25171.3	9.08	25299.2	9.08	-59313.7	9.08	23389.5
9.1	0	9.1	25253.5	9.1	25332.4	9.1	-59362.7	9.1	23431.6
9.12	0	9.12	25336.6	9.12	25355.2	9.12	-59423	9.12	23473.1
9.14	0	9.14	25420.6	9.14	25662	9.14	-59200.3	9.14	23514.2
9.16	0	9.16	25505.7	9.16	24748	9.16	-60199.3	9.16	23554.7
9.18	0	9.18	25591.7	9.18	25427	9.18	-59606.4	9.18	23594.7
9.2	0	9.2	25678.9	9.2	25433.5	9.2	-59687.1	9.2	23634.1
9.22	0	9.22	25767.3	9.22	25467.7	9.22	-59741.3	9.22	23673
9.24	0	9.24	25857	9.24	24797.9	9.24	-60500.8	9.24	23711.4
9.26	0	9.26	25948	9.26	25848.7	9.26	-59541.1	9.26	23749.1
9.28	0	9.28	26040.5	9.28	25343	9.28	-60139.2	9.28	23786.3
9.3	0	9.3	26134.5	9.3	25769.4	9.3	-59806.8	9.3	23823
9.32	0	9.32	26230.2	9.32	26094.3	9.32	-59577.6	9.32	23859
9.34	0	9.34	26327.6	9.34	26069.4	9.34	-59699.9	9.34	23894.5
9.36	0	9.36	26426.9	9.36	26213.4	9.36	-59655.1	9.36	23929.3
9.38	0	9.38	26528.2	9.38	26798.4	9.38	-59171.4	9.38	23963.6
9.4	0	9.4	26631.6	9.4	26544.5	9.4	-59528.8	9.4	23997.2
9.42	0	9.42	26737.3	9.42	26357	9.42	-59821.9	9.42	24030.3
9.44	0	9.44	26845.4	9.44	26182.8	9.44	-60104.3	9.44	24062.8
9.46	0	9.46	26956.2	9.46	26981.5	9.46	-59416.4	9.46	24094.6
9.48	0	9.48	27069.7	9.48	26369.6	9.48	-60141.8	9.48	24125.8
9.5	0	9.5	27186.2	9.5	26725.5	9.5	-59902.3	9.5	24156.5
9.52	0	9.52	27305.9	9.52	26814.8	9.52	-59932.8	9.52	24186.5
9.54	0	9.54	27429.1	9.54	27332.8	9.54	-59538	9.54	24215.9
9.56	0	9.56	27555.8	9.56	27384.4	9.56	-59613.1	9.56	24244.7
9.58	0	9.58	27686.6	9.58	27181.3	9.58	-59946.9	9.58	24272.9
9.6	0	9.6	27821.5	9.6	26917.6	9.6	-60345.6	9.6	24300.5
9.62	0	9.62	27960.9	9.62	27724.4	9.62	-59678.2	9.62	24327.4
9.64	0	9.64	28105.2	9.64	28119.7	9.64	-59427.2	9.64	24353.8
9.66	0	9.66	28254.6	9.66	27686.5	9.66	-60009.8	9.66	24379.6
9.68	0	9.68	28409.7	9.68	28716.4	9.68	-59135	9.68	24404.7
9.7	0	9.7	28570.7	9.7	29461.1	9.7	-58551.3	9.7	24429.3
9.72	0	9.72	28738.2	9.72	29185.6	9.72	-58994.3	9.72	24453.3
9.74	0	9.74	28912.7	9.74	29435.6	9.74	-58918.7	9.74	24476.7
9.76	0	9.76	29094.6	9.76	28856.7	9.76	-59679.6	9.76	24499.5
9.78	0	9.78	29284.6	9.78	29617.4	9.78	-59108.8	9.78	24521.7
9.8	0	9.8	29483.3	9.8	30321.8	9.8	-58603.1	9.8	24543.3
9.82	0	9.82	29691.3	9.82	29844.4	9.82	-59288.6	9.82	24564.4
9.84	0	9.84	29909.6	9.84	29763.7	9.84	-59587.6	9.84	24584.9
9.86	0	9.86	30138.8	9.86	30785.3	9.86	-58795.1	9.86	24604.8
9.88	0	9.88	30379.8	9.88	31004.1	9.88	-58817.4	9.88	24624.2
9.9	0	9.9	30633.8	9.9	30772.3	9.9	-59303.1	9.9	24643
9.92	0	9.92	30901.8	9.92	31691.8	9.92	-58651.6	9.92	24661.3
9.94	0	9.94	31184.9	9.94	31329.5	9.94	-59297.1	9.94	24679.1
9.96	0	9.96	31484.6	9.96	32205.9	9.96	-58720.4	9.96	24696.3
9.98	0	9.98	31802.4	9.98	32035.1	9.98	-59209	9.98	24713
10	0	10	32139.8	10	33021.1	10	-58560.4	10	24729.3
10.02	0	10.02	32498.6	10.02	33792.1	10.02	-58148.2	10.02	24745
10.04	0	10.04	32881.1	10.04	34316.6	10.04	-58006.1	10.04	24760.2
10.06	0	10.06	33289.3	10.06	35797.6	10.06	-56933.4	10.06	24774.9
10.08	0	10.08	33726.1	10.08	35925.7	10.08	-57242	10.08	24789.2
10.1	0	10.1	34194.2	10.1	35484.1	10.1	-58151.8	10.1	24803
10.12	0	10.12	34697.2	10.12	35965.8	10.12	-58173.1	10.12	24816.3
10.14	0	10.14	35238.9	10.14	37148.1	10.14	-57532.5	10.14	24829.2
10.16	0	10.16	35824.2	10.16	39344.8	10.16	-55921	10.16	24841.7
10.18	0	10.18	36458.6	10.18	39515.1	10.18	-56385.1	10.18	24853.7
10.2	0	10.2	37149	10.2	40189.9	10.2	-56400.8	10.2	24865.3
10.22	0	10.22	37904.1	10.22	41775.9	10.22	-55569.9	10.22	24876.5
10.24	0	10.24	38734.5	10.24	42026.5	10.24	-56149.7	10.24	24887.4
10.26	0	10.26	39654	10.26	43739	10.26	-55356.7	10.26	24897.8
10.28	0	10.28	40680.2	10.28	44347.2	10.28	-55774.6	10.28	24907.9
10.3	0	10.3	41835.8	10.3	47150.3	10.3	-54127.2	10.3	24917.6
10.32	0	10.32	43150	10.32	48450	10.32	-54141.6	10.32	24927
10.34	0	10.34	44660.2	10.34	49938	10.34	-54163.8	10.34	24936
10.36	0	10.36	46413.8	10.36	54216.8	10.36	-51638.7	10.36	24944.7
10.38	0	10.38	48470.3	10.38	56014.3	10.38	-51897.6	10.38	24953.1
10.4	0	10.4	50903.1	10.4	59154.2	10.4	-51190.5	10.4	24961.2
10.42	6.51647	10.42	53801	10.42	62607.8	10.42	-50634.9	10.42	24969.1
10.44	82.2956	10.44	57269.5	10.44	64416	10.44	-52295.1	10.44	24976.6
10.46	165.177	10.46	61430.6	10.46	69099.4	10.46	-51772.9	10.46	24983.9
10.48	219.601	10.48	66421.9	10.48	74592.7	10.48	-51270.9	10.48	24991
10.5	246.908	10.5	72393.5	10.5	80437.5	10.5	-51397.7	10.5	24997.8
10.52	275.954	10.52	79503.5	10.52	86039.7	10.52	-52905.5	10.52	25004.4
10.54	310.443	10.54	87910.8	10.54	94209.7	10.54	-53142.8	10.54	25010.8
10.56	351.824	10.56	97766.5	10.56	100862	10.56	-56346	10.56	25017
10.58	402.062	10.58	109203	10.58	110468	10.58	-58176.1	10.58	25023
10.6	463.878	10.6	122321	10.6	121394	10.6	-60368	10.6	25028.9
10.62	541.118	10.62	137174	10.62	133873	10.62	-62742.8	10.62	25034.6
10.64	639.527	10.64	153758	10.64	150175	10.64	-63025.4	10.64	25040.2
10.66	782.884	10.66	171987	10.66	164694	10.66	-66735	10.66	25045.6
10.68	974.938	10.68	191679	10.68	182296	10.68	-68824.8	10.68	25051
10.7	1222.88	10.7	212528	10.7	201674	10.7	-70295.6	10.7	25056.2
10.72	1563.42	10.72	234081	10.72	224444	10.72	-69079	10.72	25061.4
10.74	2066.92	10.74	255707	10.74	241475	10.74	-73673.3	10.74	25066.5
10.76	2863.37	10.76	276572	10.76	267578	10.76	-68435.2	10.76	25071.5
10.78	4238.92	10.78	295644	10.78	284982	10.78	-70104.2	10.78	25076.5
10.8	7267.74	10.8	311747	10.8	303962	10.8	-67227.3	10.8	25081.5
10.82	19584.3	10.82	323682	10.82	317604	10.82	-65519.3	10.82	25086.5
10.84	66835	10.84	330424	10.84	330477	10.84	-59388.5	10.84	25091.5
10.86	132092	10.86	331343	10.86	332188	10.86	-58596.8	10.86	25096.5
10.88	116181	10.88	326353	10.88	330935	10.88	-54859	10.88	25101.5
10.9	63128.4	10.9	315933	10.9	326407	10.9	-48967.6	10.9	25106.6
10.92	21440.5	10.92	301010	10.92	315859	10.92	-44592.4	10.92	25111.8
10.94	7890.66	10.94	282747	10.94	298296	10.94	-43893.2	10.94	25117
10.96	4623.68	10.96	262342	10.96	274833	10.96	-46950.4	10.96	25122.4
10.98	3418.54	10.98	240876	10.98	250542	10.98	-49775.8	10.98	25127.8
11	2933.19	11	219243	11	224060	11	-54624.9	11	25133.4
11.02	3046.81	11.02	198137	11.02	204096	11.02	-53482.4	11.02	25139.1
11.04	4889.76	11.04	178062	11.04	178949	11.04	-58555.4	11.04	25144.9
11.06	13976	11.06	159368	11.06	158521	11.06	-60289	11.06	25150.9
11.08	31387.9	11.08	142274	11.08	143264	11.08	-58451.1	11.08	25157.1
11.1	31736.5	11.1	126891	11.1	131544	11.1	-54788.9	11.1	25163.5
11.12	19810.9	11.12	113251	11.12	121023	11.12	-51668.8	11.12	25170.1
11.14	7579.55	11.14	101314	11.14	107768	11.14	-52987.1	11.14	25176.9
11.16	2744.14	11.16	90992.7	11.16	95255.8	11.16	-55178.5	11.16	25184
11.18	1524.68	11.18	82164	11.18	82515.1	11.18	-59090.6	11.18	25191.3
11.2	1071.27	11.2	74681.3	11.2	69378.4	11.2	-64744.6	11.2	25198.9
11.22	813.38	11.22	68387	11.22	62296.9	11.22	-65531.8	11.22	25206.8
11.24	646.632	11.24	63121.9	11.24	56215.3	11.24	-66348.2	11.24	25215
11.26	531.092	11.26	58733	11.26	50289.2	11.26	-67885.4	11.26	25223.4
11.28	406.997	11.28	55078.4	11.28	46766.7	11.28	-67753.5	11.28	25232.2
11.3	268.018	11.3	52031.3	11.3	46264.7	11.3	-65208.2	11.3	25241.4
11.32	182.694	11.32	49481	11.32	42754.9	11.32	-66167.7	11.32	25250.9
11.34	140.75	11.34	47333.5	11.34	41320	11.34	-65455.3	11.34	25260.7
11.36	120.349	11.36	45511	11.36	38544.1	11.36	-66408.6	11.36	25271
11.38	104.083	11.38	43949.8	11.38	37947.4	11.38	-65444.1	11.38	25281.6
11.4	90.9052	11.4	42599	11.4	36927.8	11.4	-65112.8	11.4	25292.7
11.42	80.0808	11.42	41418.2	11.42	37263.2	11.42	-63596.7	11.42	25304.1
11.44	71.0808	11.44	40376.1	11.44	35679.6	11.44	-64138.1	11.44	25316
11.46	63.5171	11.46	39447.9	11.46	34751.8	11.46	-64137.8	11.46	25328.4
11.48	57.0995	11.48	38614.8	11.48	35557	11.48	-62499.4	11.48	25341.2
11.5	45.7159	11.5	37861.8	11.5	34307.1	11.5	-62996.3	11.5	25354.5
11.52	22.2496	11.52	37177.4	11.52	32229.9	11.52	-64389.1	11.52	25368.3
11.54	6.72358	11.54	36552.4	11.54	33424.7	11.54	-62569.3	11.54	25382.6
11.56	0	11.56	35979.5	11.56	31937.3	11.56	-63483.9	11.56	25397.4
11.58	0	11.58	35452.7	11.58	33254.1	11.58	-61640.2	11.58	25412.7
11.6	0	11.6	34967.1	11.6	31881.4	11.6	-62527.4	11.6	25428.6
11.62	0	11.62	34518.4	11.62	31671.1	11.62	-62289	11.62	25445
11.64	0	11.64	34103.3	11.64	31653.1	11.64	-61891.8	11.64	25462
11.66	0	11.66	33718.5	11.66	31504.2	11.66	-61656	11.66	25479.5
11.68	0	11.68	33361.4	11.68	31274.9	11.68	-61528.2	11.68	25497.7
11.7	0	11.7	33029.6	11.7	31281.6	11.7	-61189.7	11.7	25516.4
11.72	0	11.72	32721	11.72	31614.9	11.72	-60547.8	11.72	25535.8
11.74	0	11.74	32433.8	11.74	31710.3	11.74	-60165.2	11.74	25555.8
11.76	0	11.76	32166.3	11.76	29315.7	11.76	-62292.3	11.76	25576.5
11.78	0	11.78	31917.1	11.78	30013.2	11.78	-61345.6	11.78	25597.8
11.8	0	11.8	31685	11.8	29813.6	11.8	-61313.1	11.8	25619.7
11.82	0	11.82	31468.9	11.82	29895	11.82	-61015.5	11.82	25642.3
11.84	0	11.84	31267.6	11.84	30722.1	11.84	-59987.1	11.84	25665.7
11.86	0	11.86	31080	11.86	30631.6	11.86	-59890.1	11.86	25689.7
11.88	0	11.88	30905.2	11.88	31040.5	11.88	-59306.4	11.88	25714.4
11.9	0	11.9	30742.4	11.9	30035	11.9	-60149	11.9	25739.8
11.92	0	11.92	30591.3	11.92	30154.8	11.92	-59878.2	11.92	25766
11.94	0	11.94	30452.9	11.94	30082.3	11.94	-59812.3	11.94	25792.9
11.96	0	11.96	30327	11.96	29797.7	11.96	-59971	11.96	25820.5
11.98	0	11.98	30213.2	11.98	29682.8	11.98	-59972.1	11.98	25849
12	0	12	30110.6	12	30938.9	12	-58613.3	12	25878.2
12.02	0	12.02	30018.1	12.02	29437.9	12.02	-60021.8	12.02	25908.1
12.04	0	12.04	29934.8	12.04	30506.9	12.04	-58869.5	12.04	25938.9
12.06	0	12.06	29859.8	12.06	29571.1	12.06	-59730.4	12.06	25970.4
12.08	0	12.08	29792.3	12.08	29970.7	12.08	-59263.3	12.08	26002.8
12.1	0	12.1	29731.4	12.1	29720.4	12.1	-59452.8	12.1	26036
12.12	0	12.12	29676.4	12.12	28626.8	12.12	-60491.3	12.12	26070
12.14	0	12.14	29626.6	12.14	29463.5	12.14	-59604.7	12.14	26104.9
12.16	0	12.16	29581.3	12.16	29970.8	12.16	-59052.2	12.16	26140.6
12.18	0	12.18	29540.2	12.18	29533.3	12.18	-59448.5	12.18	26177.1
12.2	0	12.2	29502.4	12.2	28551.7	12.2	-60392.4	12.2	26214.6
12.22	0	12.22	29467.5	12.22	29429	12.22	-59480.1	12.22	26252.9
12.24	0	12.24	29434.7	12.24	29715.5	12.24	-59160.8	12.24	26292
12.26	0	12.26	29403.4	12.26	30236.1	12.26	-58609	12.26	26332.1
12.28	0	12.28	29373.4	12.28	29969.7	12.28	-58845.4	12.28	26373.1
12.3	0	12.3	29345.9	12.3	29396.6	12.3	-59391	12.3	26414.9
12.32	0	12.32	29321.5	12.32	29918.6	12.32	-58844.5	12.32	26457.7
12.34	0	12.34	29300.8	12.34	30690.8	12.34	-58051.6	12.34	26501.4
12.36	0	12.36	29283.6	12.36	29798.8	12.36	-58926.5	12.36	26546
12.38	0	12.38	29270	12.38	30711.3	12.38	-58000.4	12.38	26591.6
12.4	0	12.4	29259.8	12.4	29764.8	12.4	-58936.6	12.4	26638.1
12.42	0	12.42	29252.8	12.42	29470.4	12.42	-59224.1	12.42	26685.5
12.44	0	12.44	29249.1	12.44	31303.6	12.44	-57387.1	12.44	26733.9
12.46	0	12.46	29248.4	12.46	29833.9	12.46	-58856.1	12.46	26783.3
12.48	0	12.48	29250.6	12.48	29805.5	12.48	-58886.9	12.48	26833.6
12.5	0	12.5	29255.8	12.5	29558.4	12.5	-59139.1	12.5	26884.9
12.52	0	12.52	29263.8	12.52	29590.2	12.52	-59115.3	12.52	26937.1
12.54	0	12.54	29274.6	12.54	30080.7	12.54	-58635.6	12.54	26990.4
12.56	0	12.56	29288	12.56	30795.7	12.56	-57934	12.56	27044.6
12.58	0	12.58	29304.1	12.58	30772.7	12.58	-57973	12.58	27099.9
12.6	0	12.6	29322.7	12.6	29971.8	12.6	-58792.6	12.6	27156.1
12.62	0	12.62	29343.8	12.62	29475.4	12.62	-59310.1	12.62	27213.3
12.64	0	12.64	29367.4	12.64	30308.8	12.64	-58500.2	12.64	27271.6
12.66	0	12.66	29393.3	12.66	31250.7	12.66	-57584.3	12.66	27330.8
12.68	0	12.68	29421.6	12.68	31200.7	12.68	-57662.6	12.68	27391.1
12.7	0	12.7	29452.2	12.7	30681	12.7	-58212.9	12.7	27452.4
12.72	0	12.72	29485.1	12.72	31478	12.72	-57448.7	12.72	27514.7
12.74	0	12.74	29520.1	12.74	30247.3	12.74	-58714.5	12.74	27578.1
12.76	0	12.76	29557.4	12.76	30455.4	12.76	-58543.6	12.76	27642.4
12.78	0	12.78	29596.7	12.78	30675.9	12.78	-58362.5	12.78	27707.8
12.8	0	12.8	29638.2	12.8	30605.7	12.8	-58474.2	12.8	27774.3
12.82	0	12.82	29681.8	12.82	30760.5	12.82	-58362.9	12.82	27841.8
12.84	0	12.84	29727.4	12.84	31402	12.84	-57767.1	12.84	27910.3
12.86	0	12.86	29775.1	12.86	30009.2	12.86	-59207.5	12.86	27979.9
12.88	0	12.88	29824.7	12.88	30608.7	12.88	-58657.6	12.88	28050.5
12.9	0	12.9	29876.3	12.9	31845.7	12.9	-57472.3	12.9	28122.2
12.92	0	12.92	29929.8	12.92	31542.4	12.92	-57829.1	12.92	28194.9
12.94	0	12.94	29985.3	12.94	31172	12.94	-58254.9	12.94	28268.7
12.96	0	12.96	30042.6	12.96	31639.9	12.96	-57844.4	12.96	28343.5
12.98	0	12.98	30101.9	12.98	31031.5	12.98	-58512	12.98	28419.4
13	0	13	30163	13	31720.8	13	-57883.9	13	28496.3
13.02	0	13.02	30225.9	13.02	31981.7	13.02	-57685.9	13.02	28574.3
13.04	0	13.04	30290.7	13.04	31145.6	13.04	-58586.8	13.04	28653.4
13.06	0	13.06	30357.3	13.06	31558.3	13.06	-58240.7	13.06	28733.5
13.08	0	13.08	30425.7	13.08	31728.1	13.08	-58139.3	13.08	28814.7
13.1	0	13.1	30495.9	13.1	31058.8	13.1	-58878.8	13.1	28896.9
13.12	0	13.12	30567.8	13.12	31059.9	13.12	-58949.6	13.12	28980.2
13.14	0	13.14	30641.5	13.14	30979.5	13.14	-59103.7	13.14	29064.6
13.16	0	13.16	30717	13.16	33007.7	13.16	-57150.9	13.16	29150
13.18	0	13.18	30794.2	13.18	32807	13.18	-57428.8	13.18	29236.4
13.2	0	13.2	30873.1	13.2	31289.4	13.2	-59025.3	13.2	29324
13.22	0	13.22	30953.7	13.22	33055.2	13.22	-57340.2	13.22	29412.6
13.24	0	13.24	31036.1	13.24	31481.6	13.24	-58996.2	13.24	29502.2
13.26	0	13.26	31120.2	13.26	32578.6	13.26	-57983.2	13.26	29592.9
13.28	0	13.28	31205.9	13.28	32326.1	13.28	-58321.5	13.28	29684.6
13.3	0	13.3	31293.4	13.3	32583.4	13.3	-58151.7	13.3	29777.4
13.32	0	13.32	31382.5	13.32	32265.3	13.32	-58558.9	13.32	29871.3
13.34	0	13.34	31473.4	13.34	32759.6	13.34	-58155.5	13.34	29966.2
13.36	0	13.36	31565.9	13.36	31795	13.36	-59212.6	13.36	30062.1
13.38	0	13.38	31662	13.38	32313.5	13.38	-58790.1	13.38	30159.1
13.4	0	13.4	31762.6	13.4	33201.2	13.4	-58003.1	13.4	30257.1
13.42	0	13.42	31868.5	13.42	33528.7	13.42	-57781.4	13.42	30356.1
13.44	0	13.44	31979.6	13.44	33922.8	13.44	-57498.4	13.44	30456.2
13.46	0	13.46	32095.4	13.46	33212.1	13.46	-58324.9	13.46	30557.3
13.48	0	13.48	32215.5	13.48	33913.9	13.48	-57743.2	13.48	30659.4
13.5	0	13.5	32339.4	13.5	33826.9	13.5	-57954.1	13.5	30762.6
13.52	0	13.52	32466.6	13.52	34529.2	13.52	-57379.1	13.52	30866.8
13.54	0	13.54	32596.7	13.54	33637.7	13.54	-58400.7	13.54	30971.9
13.56	0	13.56	32729.3	13.56	33087.3	13.56	-59083.6	13.56	31078.1
13.58	0	13.58	32863.8	13.58	34335.1	13.58	-57970.4	13.58	31185.3
13.6	0	13.6	32999.8	13.6	34008.6	13.6	-58432.9	13.6	31293.5
13.62	0	13.62	33136.8	13.62	34639.1	13.62	-57939.4	13.62	31402.7
13.64	0	13.64	33274.5	13.64	33263.1	13.64	-59453	13.64	31512.9
13.66	0	13.66	33412.2	13.66	34483.8	13.66	-58370.1	13.66	31624.1
13.68	0	13.68	33549.7	13.68	34498.6	13.68	-58492.8	13.68	31736.2
13.7	0	13.7	33686.4	13.7	35228.8	13.7	-57899.2	13.7	31849.3
13.72	0	13.72	33821.9	13.72	33447.1	13.72	-59816.4	13.72	31963.4
13.74	0	13.74	33955.7	13.74	34005.9	13.74	-59391.5	13.74	32078.5
13.76	0	13.76	34088.2	13.76	34341.7	13.76	-59188.1	13.76	32194.5
13.78	0	13.78	34221.1	13.78	34310.1	13.78	-59352.7	13.78	32311.4
13.8	0	13.8	34355.1	13.8	33886.1	13.8	-59910.7	13.8	32429.3
13.82	0	13.82	34491	13.82	35470.7	13.82	-58462	13.82	32548.2
13.84	0	13.84	34628.8	13.84	34540.2	13.84	-59530.3	13.84	32668
13.86	0	13.86	34768.6	13.86	34999.3	13.86	-59211	13.86	32788.6
13.88	0	13.88	34910.4	13.88	34741.7	13.88	-59610.3	13.88	32910.3
13.9	0	13.9	35054.2	13.9	35287.3	13.9	-59208.5	13.9	33032.8
13.92	0	13.92	35200	13.92	34992.1	13.92	-59649.6	13.92	33156.2
13.94	0	13.94	35347.9	13.94	35190.9	13.94	-59598.7	13.94	33280.5
13.96	0	13.96	35498	13.96	35318.3	13.96	-59621.3	13.96	33405.7
13.98	0	13.98	35650.2	13.98	36107.7	13.98	-58984.1	13.98	33531.8
14	0	14	35804.6	14	34703.9	14	-60542.3	14	33658.8
14.02	0	14.02	35961.3	14.02	35673.2	14.02	-59729.7	14.02	33786.6
14.04	0	14.04	36120.3	14.04	36119.1	14.04	-59442.8	14.04	33915.3
14.06	0	14.06	36281.6	14.06	36645.4	14.06	-59077.9	14.06	34044.8
14.08	0	14.08	36445.4	14.08	36369	14.08	-59518.1	14.08	34175.2
14.1	0	14.1	36611.7	14.1	37039.9	14.1	-59013.5	14.1	34306.4
14.12	0	14.12	36780.5	14.12	37638.4	14.12	-58583.8	14.12	34438.4
14.14	0	14.14	36952	14.14	37675.3	14.14	-58718.4	14.14	34571.2
14.16	0	14.16	37126.2	14.16	36417.9	14.16	-60150	14.16	34704.8
14.18	0	14.18	37303.2	14.18	36869.9	14.18	-59875	14.18	34839.3
14.2	0	14.2	37481.7	14.2	36943.5	14.2	-59979.9	14.2	34974.5
14.22	0	14.22	37658.4	14.22	36640.3	14.22	-60459.7	14.22	35110.4
14.24	0	14.24	37832	14.24	38196	14.24	-59077.7	14.24	35247.2
14.26	0	14.26	38003.2	14.26	37873.6	14.26	-59571.2	14.26	35384.7
14.28	0	14.28	38173	14.28	37560.4	14.28	-60054.3	14.28	35522.9
14.3	0	14.3	38342.5	14.3	38913	14.3	-58871.1	14.3	35661.9
14.32	0	14.32	38512.5	14.32	37905.5	14.32	-60048.6	14.32	35801.6
14.34	0	14.34	38684.1	14.34	39289.2	14.34	-58836.5	14.34	35942.1
14.36	0	14.36	38858.3	14.36	37976.5	14.36	-60323.4	14.36	36083.2
14.38	0	14.38	39036.2	14.38	38735.5	14.38	-59742.3	14.38	36225
14.4	0	14.4	39218.8	14.4	39981.8	14.4	-58678.6	14.4	36367.5
14.42	0	14.42	39407.2	14.42	39666	14.42	-59182.8	14.42	36510.7
14.44	0	14.44	39602.5	14.44	37918.2	14.44	-61126	14.44	36654.6
14.46	0	14.46	39805.8	14.46	37939.5	14.46	-61308	14.46	36799.1
14.48	0	14.48	40018.4	14.48	39577.3	14.48	-59882.7	14.48	36944.2
14.5	0	14.5	40241.2	14.5	39916.6	14.5	-59766.3	14.5	37090
14.52	0	14.52	40475.7	14.52	39111.7	14.52	-60805.6	14.52	37236.4
14.54	0	14.54	40722.9	14.54	40246.5	14.54	-59918.1	14.54	37383.4
14.56	0	14.56	40984.2	14.56	39932.5	14.56	-60493.4	14.56	37531
14.58	0	14.58	41257	14.58	40562.4	14.58	-60136.3	14.58	37679.1
14.6	0	14.6	41539.2	14.6	41519.3	14.6	-59461.6	14.6	37827.9
14.62	0	14.62	41830	14.62	41164.1	14.62	-60107.5	14.62	37977.2
14.64	0	14.64	42130	14.64	40639.8	14.64	-60931.9	14.64	38127.1
14.66	0	14.66	42440	14.66	41523.5	14.66	-60358.2	14.66	38277.5
14.68	0	14.68	42760.9	14.68	41606	14.68	-60596.6	14.68	38428.4
14.7	0	14.7	43093.4	14.7	41747.7	14.7	-60787.4	14.7	38579.8
14.72	0	14.72	43438.7	14.72	42761.1	14.72	-60119.2	14.72	38731.8
14.74	0	14.74	43797.9	14.74	43917.6	14.74	-59321.9	14.74	38884.2
14.76	0	14.76	44172.3	14.76	44690.1	14.76	-58923.8	14.76	39037.1
14.78	0	14.78	44563.5	14.78	42695.2	14.78	-61310	14.78	39190.5
14.8	0	14.8	44973.4	14.8	44594.1	14.8	-59821	14.8	39344.3
14.82	0	14.82	45407.8	14.82	43454.4	14.82	-61395.1	14.82	39498.6
14.84	0	14.84	45870.3	14.84	44568.2	14.84	-60743.8	14.84	39653.3
14.86	0	14.86	46365.3	14.86	46198.4	14.86	-59608.6	14.86	39808.4
14.88	0	14.88	46896	14.88	46444.4	14.88	-59893.3	14.88	39963.9
14.9	0	14.9	47466.1	14.9	47909.1	14.9	-58998.6	14.9	40119.9
14.92	0	14.92	48080.1	14.92	47712.1	14.92	-59809.7	14.92	40276.1
14.94	3.65095	14.94	48743.8	14.94	48898.3	14.94	-59287.1	14.94	40432.8
14.96	21.7806	14.96	49464.6	14.96	49502.7	14.96	-59403.6	14.96	40589.8
14.98	34.008	14.98	50251.9	14.98	49944	14.98	-59749.6	14.98	40747.2
15	46.6056	15	51117.3	15	51095.2	15	-59463.8	15	40904.9
15.02	54.8892	15.02	52075.3	15.02	52515	15.02	-59001.9	15.02	41062.8
15.04	61.2641	15.04	53143.8	15.04	53405.7	15.04	-59179.7	15.04	41221.1
15.06	68.8188	15.06	54344.5	15.06	55351.1	15.06	-58435	15.06	41379.7
15.08	77.8638	15.08	55703.6	15.08	56306.9	15.08	-58838.4	15.08	41538.6
15.1	97.0579	15.1	57252.3	15.1	57370.8	15.1	-59323.1	15.1	41697.7
15.12	151.376	15.12	59027	15.12	59824.3	15.12	-58644.4	15.12	41857.1
15.14	195.39	15.14	61069.6	15.14	62301.8	15.14	-58209.5	15.14	42016.7
15.16	244.957	15.16	63427.5	15.16	61698.7	15.16	-61170.5	15.16	42176.6
15.18	291.445	15.18	66153	15.18	65434.7	15.18	-60160	15.18	42336.6
15.2	342.235	15.2	69301.9	15.2	69788.2	15.2	-58955.3	15.2	42496.9
15.22	409.003	15.22	72932	15.22	73210.5	15.22	-59163.2	15.22	42657.3
15.24	499.833	15.24	77103.2	15.24	77586.3	15.24	-58958.6	15.24	42817.9
15.26	628.97	15.26	81869.8	15.26	79736.6	15.26	-61574.9	15.26	42978.7
15.28	823.632	15.28	87275.4	15.28	85433.8	15.28	-61283.3	15.28	43139.6
15.3	1142.94	15.3	93346.7	15.3	91515.2	15.3	-61273.1	15.3	43300.7
15.32	1798.21	15.32	100086	15.32	96844.8	15.32	-62682.9	15.32	43461.9
15.34	4265.81	15.34	107467	15.34	102701	15.34	-64208.2	15.34	43623.2
15.36	13694.9	15.36	115432	15.36	114023	15.36	-60850.8	15.36	43784.5
15.38	27138.6	15.38	123890	15.38	119829	15.38	-63502.5	15.38	43946
15.4	23533.2	15.4	132721	15.4	129705	15.4	-62458	15.4	44107.5
15.42	18216.5	15.42	141776	15.42	140844	15.42	-60373.7	15.42	44269.1
15.44	10266.4	15.44	150868	15.44	151915	15.44	-58394.1	15.44	44430.8
15.46	4937.74	15.46	159757	15.46	163971	15.46	-55228.3	15.46	44592.4
15.48	4531.84	15.48	168131	15.48	173572	15.48	-54001.5	15.48	44754.1
15.5	9376.21	15.5	175590	15.5	184447	15.5	-50585.4	15.5	44915.8
15.52	29954.8	15.52	181664	15.52	193351	15.52	-47754.1	15.52	45077.5
15.54	60010.7	15.54	185863	15.54	198420	15.54	-46884.8	15.54	45239.1
15.56	51665.7	15.56	187774	15.56	202705	15.56	-44510.2	15.56	45400.8
15.58	39290.1	15.58	187156	15.58	205626	15.58	-40971.3	15.58	45562.3
15.6	20939.9	15.6	184010	15.6	197987	15.6	-45464.7	15.6	45723.9
15.62	7113.84	15.62	178584	15.62	188812	15.62	-49214.2	15.62	45885.3
15.64	2929.7	15.64	171317	15.64	181882	15.64	-48877.2	15.64	46046.7
15.66	1796.3	15.66	162744	15.66	167939	15.66	-54246.2	15.66	46208
15.68	1262.36	15.68	153402	15.68	150616	15.68	-62226.9	15.68	46369.1
15.7	941.09	15.7	143768	15.7	138337	15.7	-64873.4	15.7	46530.2
15.72	730.902	15.72	134227	15.72	128295	15.72	-65373.5	15.72	46691.1
15.74	585.404	15.74	125063	15.74	116090	15.74	-68414.4	15.74	46851.8
15.76	480.251	15.76	116471	15.76	105134	15.76	-70778.7	15.76	47012.4
15.78	401.628	15.78	108577	15.78	98381.8	15.78	-69636.9	15.78	47172.9
15.8	337.656	15.8	101447	15.8	90180	15.8	-70709	15.8	47333.1
15.82	274.271	15.82	95105.7	15.82	84187.1	15.82	-70360.3	15.82	47493.2
15.84	228.922	15.84	89542.7	15.84	82133.3	15.84	-66851.1	15.84	47653
15.86	191.949	15.86	84724.5	15.86	75597.2	15.86	-68568.9	15.86	47812.7
15.88	166.211	15.88	80599.9	15.88	74357.6	15.88	-65684	15.88	47972.1
15.9	147.378	15.9	77106.7	15.9	70843.1	15.9	-65705.3	15.9	48131.2
15.92	131.579	15.92	74176.5	15.92	66571	15.92	-67047.2	15.92	48290.1
15.94	118.193	15.94	71739.4	15.94	67338.4	15.94	-63842.6	15.94	48448.8
15.96	99.4482	15.96	69726.9	15.96	65049.3	15.96	-64119.2	15.96	48607.2
15.98	53.9291	15.98	68074.9	15.98	63464.3	15.98	-64052.3	15.98	48765.2
16	28.6196	16	66725.1	16	62575.9	16	-63590.9	16	48923
16.02	7.72292	16.02	65626.3	16.02	61466.4	16.02	-63601.6	16.02	49080.5
16.04	0	16.04	64734.2	16.04	60369.3	16.04	-63806.6	16.04	49237.6
16.06	0	16.06	64011.7	16.06	59612.8	16.06	-63840.6	16.06	49394.4
16.08	0	16.08	63428.2	16.08	58934.4	16.08	-63935.4	16.08	49550.9
16.1	0	16.1	62958.8	16.1	58956.5	16.1	-63444	16.1	49707
16.12	0	16.12	62583.9	16.12	59043.1	16.12	-62982.5	16.12	49862.7
16.14	0	16.14	62287.7	16.14	57635.8	16.14	-64093.6	16.14	50018.1
16.16	0	16.16	62058	16.16	58387.3	16.16	-63112.4	16.16	50173.1
16.18	0	16.18	61885.3	16.18	57441.5	16.18	-63885.5	16.18	50327.7
16.2	0	16.2	61762.3	16.2	57750.7	16.2	-63453.3	16.2	50481.8
16.22	0	16.22	61683.3	16.22	58889	16.22	-62236	16.22	50635.6
16.24	0	16.24	61644.1	16.24	57091.4	16.24	-63994.3	16.24	50788.9
16.26	0	16.26	61641.2	16.26	57462.8	16.26	-63620.1	16.26	50941.8
16.28	0	16.28	61672	16.28	57701.9	16.28	-63411.8	16.28	51094.2
16.3	0	16.3	61734.4	16.3	57770.7	16.3	-63405.4	16.3	51246.2
16.32	0	16.32	61826.9	16.32	58431.8	16.32	-62836.8	16.32	51397.7
16.34	0	16.34	61948.4	16.34	58879.2	16.34	-62510.8	16.34	51548.7
16.36	0	16.36	62097.8	16.36	59305.7	16.36	-62233.8	16.36	51699.2
16.38	0	16.38	62274.9	16.38	58958	16.38	-62758.6	16.38	51849.2
16.4	0	16.4	62479.3	16.4	60792	16.4	-61128.9	16.4	51998.7
16.42	0	16.42	62711.1	16.42	60875.6	16.42	-61277.2	16.42	52147.7
16.44	0	16.44	62970.6	16.44	59684.1	16.44	-62728.2	16.44	52296.2
16.46	0	16.46	63258.6	16.46	61067.9	16.46	-61632.4	16.46	52444.1
16.48	0	16.48	63575.9	16.48	61912.7	16.48	-61104.8	16.48	52591.5
16.5	0	16.5	63923.7	16.5	63317	16.5	-60048.4	16.5	52738.4
16.52	0	16.52	64303.9	16.52	62571.3	16.52	-61174.2	16.52	52884.6
16.54	0	16.54	64718.5	16.54	65777.2	16.54	-58382.9	16.54	53030.3
16.56	0	16.56	65170.2	16.56	66570	16.56	-58041.8	16.56	53175.4
16.58	0	16.58	65662.5	16.58	65165.5	16.58	-59938.7	16.58	53320
16.6	0	16.6	66199.8	16.6	66807.6	16.6	-58833.9	16.6	53463.9
16.62	0	16.62	66787.4	16.62	68355.3	16.62	-57873.8	16.62	53607.2
16.64	0	16.64	67432.4	16.64	69353	16.64	-57521.1	16.64	53749.9
16.66	0	16.66	68143.4	16.66	69931.3	16.66	-57653.8	16.66	53892
16.68	0	16.68	68931.6	16.68	69174	16.68	-59199.3	16.68	54033.5
16.7	0	16.7	69811.2	16.7	74203.3	16.7	-55049.6	16.7	54174.3
16.72	0	16.72	70799.7	16.72	75265.1	16.72	-54976.3	16.72	54314.4
16.74	0	16.74	71918.9	16.74	78281.1	16.74	-53079.5	16.74	54454
16.76	6.14607	16.76	73195.7	16.76	79992.1	16.76	-52645.2	16.76	54592.8
16.78	116.87	16.78	74662.4	16.78	81793.9	16.78	-52310.2	16.78	54731
16.8	218.093	16.8	76357.7	16.8	85389.2	16.8	-50410.1	16.8	54868.5
16.82	288.62	16.82	78326.8	16.82	86755.9	16.82	-51012.5	16.82	55005.4
16.84	372.587	16.84	80621.8	16.84	90803.5	16.84	-49260	16.84	55141.5
16.86	416.8	16.86	83301	16.86	95200.1	16.86	-47542.6	16.86	55277
16.88	466.714	16.88	86428.4	16.88	100023	16.88	-45846.8	16.88	55411.7
16.9	526.176	16.9	90072.8	16.9	104010	16.9	-45504.8	16.9	55545.7
16.92	597.791	16.92	94303.7	16.92	107909	16.92	-45836.6	16.92	55679.1
16.94	685.117	16.94	99190	16.94	114775	16.94	-43856.4	16.94	55811.7
16.96	793.12	16.96	104795	16.96	119190	16.96	-45046.9	16.96	55943.5
16.98	928.892	16.98	111175	16.98	126768	16.98	-43848	16.98	56074.7
17	1102.86	17	118368	17	133675	17	-44134.8	17	56205.1
17.02	1330.85	17.02	126395	17.02	142196	17.02	-43641	17.02	56334.7
17.04	1637.84	17.04	135247	17.04	147815	17.04	-46873.5	17.04	56463.7
17.06	2065.1	17.06	144878	17.06	155137	17.06	-49182.7	17.06	56591.8
17.08	2684.82	17.08	155195	17.08	161994	17.08	-52643	17.08	56719.2
17.1	3632.54	17.1	166043	17.1	170657	17.1	-54828	17.1	56845.8
17.12	5188.43	17.12	177190	17.12	178716	17.12	-57915.2	17.12	56971.7
17.14	8115.13	17.14	188308	17.14	184999	17.14	-62750.7	17.14	57096.7
17.16	17003	17.16	198968	17.16	189814	17.16	-68595.5	17.16	57221
17.18	56893.6	17.18	208646	17.18	196116	17.18	-71972.4	17.18	57344.5
17.2	152984	17.2	216757	17.2	198288	17.2	-77910	17.2	57467.2
17.22	177953	17.22	222724	17.22	200927	17.22	-81238.9	17.22	57589.1
17.24	127336	17.24	226075	17.24	202682	17.24	-82834.9	17.24	57710.3
17.26	100439	17.26	226536	17.26	207213	17.26	-78764.3	17.26	57830.6
17.28	44273.5	17.28	224088	17.28	202192	17.28	-81337.4	17.28	57950.1
17.3	14611.8	17.3	218971	17.3	201496	17.3	-76916.7	17.3	58068.7
17.32	6947.58	17.32	211629	17.32	200347	17.32	-70723.5	17.32	58186.6
17.34	4498.18	17.34	202617	17.34	194868	17.34	-67191.1	17.34	58303.7
17.36	3202.28	17.36	192514	17.36	187946	17.36	-64010.4	17.36	58419.9
17.38	2399.98	17.38	181853	17.38	180183	17.38	-61111.7	17.38	58535.3
17.4	1867.23	17.4	171077	17.4	174867	17.4	-55651.8	17.4	58649.8
17.42	1495	17.42	160531	17.42	167024	17.42	-52948.7	17.42	58763.6
17.44	1224.45	17.44	150467	17.44	158889	17.44	-51019.2	17.44	58876.4
17.46	1021.53	17.46	141053	17.46	151798	17.46	-48697.3	17.46	58988.5
17.48	865.35	17.48	132398	17.48	144903	17.48	-46936.7	17.48	59099.7
17.5	742.548	17.5	124557	17.5	138368	17.5	-45630.3	17.5	59210
17.52	644.22	17.52	117545	17.52	129653	17.52	-47333.5	17.52	59319.5
17.54	564.253	17.54	111350	17.54	122960	17.54	-47831.7	17.54	59428.2
17.56	498.336	17.56	105936	17.56	117866	17.56	-47511.7	17.56	59536
17.58	443.352	17.58	101251	17.58	111641	17.58	-49052	17.58	59642.9
17.6	397.007	17.6	97235	17.6	109018	17.6	-47658.3	17.6	59749
17.62	357.578	17.62	93819.8	17.62	103150	17.62	-50112	17.62	59854.2
17.64	255.244	17.64	90936.4	17.64	100139	17.64	-50239.3	17.64	59958.5
17.66	124.304	17.66	88516.7	17.66	96958.4	17.66	-50999.9	17.66	60062
17.68	76.3589	17.68	86496.3	17.68	94532.8	17.68	-51405.2	17.68	60164.6
17.7	12.7182	17.7	84816.1	17.7	92928.9	17.7	-51328.8	17.7	60266.3
17.72	0	17.72	83422.9	17.72	90888.1	17.72	-51976.5	17.72	60367.2
17.74	0	17.74	82270.7	17.74	88577	17.74	-53135.5	17.74	60467.2
17.76	0	17.76	81319.8	17.76	86731.6	17.76	-54029.9	17.76	60566.3
17.78	0	17.78	80536.8	17.78	83775.3	17.78	-56203.1	17.78	60664.5
17.8	0	17.8	79894.1	17.8	83773.9	17.8	-55561.9	17.8	60761.8
17.82	0	17.82	79369.3	17.82	82803.4	17.82	-56007.5	17.82	60858.3
17.84	0	17.84	78944.1	17.84	83175.6	17.84	-55210.2	17.84	60953.9
17.86	0	17.86	78604.3	17.86	81909.5	17.86	-56136.4	17.86	61048.6
17.88	0	17.88	78338.3	17.88	82050.7	17.88	-55729.3	17.88	61142.4
17.9	0	17.9	78137.4	17.9	81096.6	17.9	-56482.5	17.9	61235.3
17.92	0	17.92	77994.4	17.92	79335.6	17.92	-58100.5	17.92	61327.3
17.94	0	17.94	77904	17.94	79621.5	17.94	-57724.2	17.94	61418.5
17.96	0	17.96	77862.1	17.96	79001.8	17.96	-58301.9	17.96	61508.7
17.98	0	17.98	77865.3	17.98	77944.6	17.98	-59362.4	17.98	61598.1
18	0	18	77911.5	18	79272.2	18	-58080.9	18	61686.6
18.02	0	18.02	77998.6	18.02	77596.5	18.02	-59843.8	18.02	61774.2
18.04	0	18.04	78125.6	18.04	77965.6	18.04	-59601.7	18.04	61860.9
18.06	0	18.06	78291.7	18.06	77623.7	18.06	-60109.7	18.06	61946.7
18.08	0	18.08	78496.5	18.08	77391.8	18.08	-60546.4	18.08	62031.6
18.1	0	18.1	78740	18.1	78726.1	18.1	-59455.6	18.1	62115.6
18.12	0	18.12	79022.6	18.12	79520.4	18.12	-58943.9	18.12	62198.8
18.14	0	18.14	79345	18.14	78899	18.14	-59887.7	18.14	62281
18.16	0	18.16	79708.2	18.16	78723.1	18.16	-60426.8	18.16	62362.3
18.18	0	18.18	80113.7	18.18	79982.4	18.18	-59573	18.18	62442.8
18.2	0	18.2	80563.3	18.2	79719.4	18.2	-60285.6	18.2	62522.4
18.22	0	18.22	81059.4	18.22	80347	18.22	-60154	18.22	62601
18.24	0	18.24	81604.6	18.24	80379.6	18.24	-60666.6	18.24	62678.8
18.26	0	18.26	82202.3	18.26	80010.5	18.26	-61633.5	18.26	62755.7
18.28	0	18.28	82856.7	18.28	81750.4	18.28	-60547.9	18.28	62831.7
18.3	0	18.3	83572.5	18.3	82454.9	18.3	-60559.2	18.3	62906.8
18.32	0	18.32	84355.7	18.32	82715.5	18.32	-61081.9	18.32	62981
18.34	0	18.34	85213.7	18.34	83032.5	18.34	-61622.8	18.34	63054.3
18.36	0	18.36	86155	18.36	86335.3	18.36	-59261.4	18.36	63126.8
18.38	0	18.38	87190.7	18.38	85655.1	18.38	-60977.2	18.38	63198.3
18.4	0	18.4	88333.9	18.4	87025.2	18.4	-60750.3	18.4	63269
18.42	0	18.42	89600.9	18.42	87101.5	18.42	-61941	18.42	63338.7
18.44	0	18.44	91011.8	18.44	91078.2	18.44	-59375.2	18.44	63407.6
18.46	0	18.46	92591.1	18.46	92119.3	18.46	-59913.5	18.46	63475.6
18.48	0	18.48	94368.6	18.48	93460.9	18.48	-60349.4	18.48	63542.7
18.5	0	18.5	96380.4	18.5	98543.1	18.5	-57278.9	18.5	63608.9
18.52	0	18.52	98669.5	18.52	100236	18.52	-57875.5	18.52	63674.3
18.54	0	18.54	101287	18.54	101754	18.54	-58975.1	18.54	63738.7
18.56	127.243	18.56	104293	18.56	104525	18.56	-59209.7	18.56	63802.3
18.58	315.622	18.58	107756	18.58	106498	18.58	-60698.9	18.58	63865
18.6	391.519	18.6	111753	18.6	111197	18.6	-59997.7	18.6	63926.8
18.62	530.818	18.62	116372	18.62	113405	18.62	-62408.3	18.62	63987.7
18.64	623.588	18.64	121706	18.64	119844	18.64	-61302.9	18.64	64047.8
18.66	696.168	18.66	127855	18.66	125990	18.66	-61307.4	18.66	64106.9
18.68	782.226	18.68	134925	18.68	130623	18.68	-63743.1	18.68	64165.2
18.7	885.325	18.7	143018	18.7	136719	18.7	-65740.8	18.7	64222.7
18.72	1010.29	18.72	152235	18.72	146263	18.72	-65414.3	18.72	64279.2
18.74	1163.79	18.74	162670	18.74	154828	18.74	-67283.6	18.74	64334.9
18.76	1355.25	18.76	174398	18.76	165431	18.76	-68409.2	18.76	64389.7
18.78	1598.33	18.78	187479	18.78	178738	18.78	-68182.3	18.78	64443.6
18.8	1913.46	18.8	201938	18.8	190835	18.8	-70544.9	18.8	64496.7
18.82	2332.31	18.82	217765	18.82	209533	18.82	-67673.1	18.82	64548.9
18.84	2906.09	18.84	234896	18.84	228026	18.84	-66311.2	18.84	64600.2
18.86	3722.03	18.86	253203	18.86	244923	18.86	-67722.1	18.86	64650.7
18.88	4938.6	18.88	272471	18.88	265665	18.88	-66247.4	18.88	64700.3
18.9	6868.25	18.9	292379	18.9	290320	18.9	-61501.4	18.9	64749
18.92	10230.7	18.92	312479	18.92	310673	18.92	-61247.1	18.92	64796.9
18.94	18113.3	18.94	332172	18.94	333659	18.94	-57955.2	18.94	64843.9
18.96	51553.2	18.96	350717	18.96	354494	18.96	-55664.1	18.96	64890
18.98	166692	18.98	367245	18.98	368051	18.98	-58635.6	18.98	64935.3
19	288000	19	380834	19	390601	19	-49673.9	19	64979.7
19.02	210689	19.02	390612	19.02	403258	19.02	-46796.1	19.02	65023.3
19.04	172385	19.04	395890	19.04	407806	19.04	-47525.5	19.04	65066
19.06	124197	19.06	396278	19.06	413705	19.06	-42014.4	19.06	65107.9
19.08	47084.4	19.08	391760	19.08	416994	19.08	-34207.1	19.08	65148.9
19.1	16585.7	19.1	382692	19.1	403194	19.1	-38939.4	19.1	65189.1
19.12	9043.92	19.12	369731	19.12	389079	19.12	-40093.6	19.12	65228.4
19.14	6136.59	19.14	353723	19.14	375465	19.14	-37699	19.14	65266.8
19.16	4483.35	19.16	335573	19.16	354036	19.16	-40978.8	19.16	65304.4
19.18	3434.68	19.18	316146	19.18	326191	19.18	-49397.5	19.18	65341.2
19.2	2729.54	19.2	296200	19.2	300453	19.2	-55188.7	19.2	65377.1
19.22	2236.34	19.22	276347	19.22	277112	19.22	-58677.2	19.22	65412.2
19.24	1883.62	19.24	257059	19.24	247020	19.24	-69480.7	19.24	65446.4
19.26	1631.63	19.26	238675	19.26	228413	19.26	-69702.7	19.26	65479.8
19.28	1460.41	19.28	221426	19.28	204294	19.28	-76573.6	19.28	65512.4
19.3	1367.32	19.3	205455	19.3	192540	19.3	-72356.7	19.3	65544.1
19.32	1384.04	19.32	190837	19.32	175159	19.32	-75119.1	19.32	65574.9
19.34	1779.58	19.34	177592	19.34	162251	19.34	-74782.5	19.34	65604.9
19.36	3915.43	19.36	165700	19.36	152490	19.36	-72651.7	19.36	65634.1
19.38	8681.38	19.38	155110	19.38	145982	19.38	-68570	19.38	65662.5
19.4	9062.23	19.4	145748	19.4	139881	19.4	-65308.7	19.4	65690
19.42	6237.24	19.42	137524	19.42	132102	19.42	-64863.6	19.42	65716.7
19.44	5552.2	19.44	130338	19.44	128890	19.44	-60889.6	19.44	65742.6
19.46	2912.01	19.46	124088	19.46	123964	19.46	-59565.4	19.46	65767.6
19.48	1015.52	19.48	118669	19.48	119925	19.48	-58185.9	19.48	65791.8
19.5	398.414	19.5	113980	19.5	115465	19.5	-57957.2	19.5	65815.1
19.52	241.406	19.52	109927	19.52	112306	19.52	-57063.1	19.52	65837.6
19.54	169.973	19.54	106422	19.54	108265	19.54	-57597.9	19.54	65859.3
19.56	126.571	19.56	103384	19.56	103988	19.56	-58837.7	19.56	65880.2
19.58	98.0436	19.58	100745	19.58	104404	19.58	-55782.6	19.58	65900.3
19.6	78.2532	19.6	98443.3	19.6	99420.6	19.6	-58464.4	19.6	65919.5
19.62	63.9439	19.62	96425.4	19.62	96353.2	19.62	-59513.9	19.62	65937.9
19.64	53.2526	19.64	94647.2	19.64	95545.2	19.64	-58543.6	19.64	65955.4
19.66	45.049	19.66	93071.1	19.66	93713.4	19.66	-58799.3	19.66	65972.2
19.68	38.6136	19.68	91666	19.68	90519.9	19.68	-60587.8	19.68	65988.1
19.7	33.4706	19.7	90406.4	19.7	88211.4	19.7	-61636.6	19.7	66003.2
19.72	29.2944	19.72	89271.1	19.72	89015.1	19.72	-59697.7	19.72	66017.4
19.74	25.8562	19.74	88242.9	19.74	87218.6	19.74	-60466	19.74	66030.9
19.76	22.9914	19.76	87307.8	19.76	86369.6	19.76	-60379.9	19.76	66043.5
19.78	20.5789	19.78	86454.1	19.78	85425.3	19.78	-60470.5	19.78	66055.3
19.8	18.528	19.8	85672.3	19.8	84095.3	19.8	-61018.7	19.8	66066.3
19.82	14.1812	19.82	84954.5	19.82	82924.7	19.82	-61471.5	19.82	66076.5
19.84	7.18033	19.84	84294.1	19.84	82930.3	19.84	-60805.4	19.84	66085.8
19.86	5.03732	19.86	83685.4	19.86	83424.8	19.86	-59702.3	19.86	66094.3
19.88	1.91797	19.88	83123.7	19.88	81843.8	19.88	-60721.5	19.88	66102
19.9	0	19.9	82604.9	19.9	81248.4	19.9	-60798.1	19.9	66108.9
19.92	0	19.92	82125.5	19.92	80737.1	19.92	-60830.1	19.92	66115
19.94	0	19.94	81682.4	19.94	78386.4	19.94	-62737.7	19.94	66120.2
19.96	0	19.96	81273	19.96	77620.5	19.96	-63094.1	19.96	66124.6
19.98	0	19.98	80894.7	19.98	81037	19.98	-59299.3	19.98	66128.3
20	0	20	80545.5	20	79460.1	20	-60527	20	66131
20.02	0	20.02	80223.6	20.02	78960.1	20.02	-60705.1	20.02	66133
20.04	0	20.04	79927.2	20.04	78577.1	20.04	-60791.8	20.04	66134.2
20.06	0	20.06	79654.9	20.06	79534.8	20.06	-59561.7	20.06	66134.5
20.08	0	20.08	79405.4	20.08	78904.4	20.08	-59942.6	20.08	66134
20.1	0	20.1	79177.6	20.1	77753.6	20.1	-60865.7	20.1	66132.7
20.12	0	20.12	78970.5	20.12	76688.5	20.12	-61723.7	20.12	66130.6
20.14	0	20.14	78783.3	20.14	76565.2	20.14	-61659.8	20.14	66127.7
20.16	0	20.16	78615.3	20.16	77394.5	20.16	-60662.5	20.16	66123.9
20.18	0	20.18	78466	20.18	76649.9	20.18	-61257.8	20.18	66119.4
20.2	0	20.2	78335	20.2	75779.3	20.2	-61997.3	20.2	66114
20.22	0	20.22	78222	20.22	75900.7	20.22	-61762.9	20.22	66107.8
20.24	0	20.24	78127	20.24	76759	20.24	-60809.7	20.24	66100.8
20.26	0	20.26	78050.2	20.26	75453.6	20.26	-62038.3	20.26	66092.9
20.28	0	20.28	77991.9	20.28	75350.3	20.28	-62083.3	20.28	66084.3
20.3	0	20.3	77952.6	20.3	77279	20.3	-60115.3	20.3	66074.8
20.32	0	20.32	77933.1	20.32	76696.8	20.32	-60677.9	20.32	66064.5
20.34	0	20.34	77934.4	20.34	77103.7	20.34	-60272.3	20.34	66053.4
20.36	0	20.36	77957.9	20.36	75010.3	20.36	-62389.3	20.36	66041.4
20.38	0	20.38	78005.4	20.38	76040.6	20.38	-61406.4	20.38	66028.7
20.4	0	20.4	78078.7	20.4	76049.9	20.4	-61470.5	20.4	66015.1
20.42	0.31048	20.42	78180.1	20.42	76610.8	20.42	-61010.9	20.42	66000.7
20.44	8.26916	20.44	78312.2	20.44	77144.8	20.44	-60609	20.44	65985.5
20.46	16.4266	20.46	78477.9	20.46	76939.9	20.46	-60979.6	20.46	65969.4
20.48	19.453	20.48	78680.4	20.48	76669.4	20.48	-61452.7	20.48	65952.6
20.5	26.2735	20.5	78923	20.5	76649.2	20.5	-61715.4	20.5	65934.9
20.52	31.0777	20.52	79209.3	20.52	76407.3	20.52	-62243.7	20.52	65916.4
20.54	34.6796	20.54	79543.1	20.54	76780.4	20.54	-62204.4	20.54	65897.1
20.56	38.9479	20.56	79927.9	20.56	77307.6	20.56	-62062	20.56	65876.9
20.58	44.058	20.58	80367.4	20.58	75924.6	20.58	-63884.5	20.58	65855.9
20.6	50.2475	20.6	80864.9	20.6	75998.7	20.6	-64307.8	20.6	65834.2
20.62	57.8443	20.62	81423.1	20.62	75936.2	20.62	-64928.6	20.62	65811.5
20.64	67.3113	20.64	82044.4	20.64	77936.2	20.64	-63549.9	20.64	65788.1
20.66	79.3192	20.66	82730.2	20.66	78844.9	20.66	-63327	20.66	65763.8
20.68	94.8696	20.68	83480.6	20.68	78645.6	20.68	-64276.7	20.68	65738.7
20.7	115.513	20.7	84294.5	20.7	80030.1	20.7	-63706	20.7	65712.8
20.72	143.752	20.72	85168.6	20.72	80510.8	20.72	-64099.4	20.72	65686
20.74	183.845	20.74	86097	20.74	81015.2	20.74	-64523.5	20.74	65658.5
20.76	243.507	20.76	87068.9	20.76	81975.8	20.76	-64534.8	20.76	65630.1
20.78	337.918	20.78	88071.8	20.78	81806.5	20.78	-65707	20.78	65600.8
20.8	502.036	20.8	89088.2	20.8	85544.1	20.8	-62985.8	20.8	65570.8
20.82	886.336	20.82	90096	20.82	87368.7	20.82	-62169	20.82	65539.9
20.84	2503.3	20.84	91068.8	20.84	88785.5	20.84	-61724.9	20.84	65508.2
20.86	8049.57	20.86	91976.2	20.86	90860.3	20.86	-60557.6	20.86	65475.6
20.88	14026.9	20.88	92786.2	20.88	93892.9	20.88	-58334.9	20.88	65442.3
20.9	9972.96	20.9	93467.5	20.9	92532.7	20.9	-60376.4	20.9	65408.1
20.92	7789.21	20.92	93994	20.92	93644.5	20.92	-59791.2	20.92	65373
20.94	7039.88	20.94	94348.8	20.94	96466.2	20.94	-57324.2	20.94	65337.2
20.96	3129.34	20.96	94526.1	20.96	95869.6	20.96	-58098.2	20.96	65300.5
20.98	1040.19	20.98	94533.6	20.98	95749.1	20.98	-58226.2	20.98	65262.9
21	499.937	21	94390.4	21	96154.9	21	-57677.1	21	65224.6
21.02	326.822	21.02	94125	21.02	96673.3	21.02	-56893.4	21.02	65185.4
21.04	234.681	21.04	93771.5	21.04	95328.2	21.04	-57885	21.04	65145.4
21.06	177.165	21.06	93366	21.06	93159.6	21.06	-59648.1	21.06	65104.5
21.08	138.686	21.08	92943.5	21.08	94511.2	21.08	-57874	21.08	65062.9
21.1	111.622	21.1	92536	21.1	94814.1	21.1	-57163.6	21.1	65020.3
21.12	91.8359	21.12	92171.3	21.12	93437.9	21.12	-58175	21.12	64977
21.14	76.9174	21.14	91871.2	21.14	93858.8	21.14	-57454	21.14	64932.8
21.16	65.3823	21.16	91654.1	21.16	94301.8	21.16	-56794	21.16	64887.8
21.18	56.2744	21.18	91536.3	21.18	94287	21.18	-56690.9	21.18	64842
21.2	48.9544	21.2	91530.9	21.2	94426.9	21.2	-56545.7	21.2	64795.3
21.22	42.9812	21.22	91650.7	21.22	96728.7	21.22	-54363.7	21.22	64747.8
21.24	38.0423	21.24	91907.9	21.24	96422.1	21.24	-54927.4	21.24	64699.4
21.26	33.9112	21.26	92314.6	21.26	99646	21.26	-52110.3	21.26	64650.3
21.28	30.4204	21.28	92883.7	21.28	101257	21.28	-51068.4	21.28	64600.3
21.3	27.378	21.3	93629.1	21.3	102192	21.3	-50878.5	21.3	64549.4
21.32	18.3851	21.32	94566.3	21.32	102840	21.32	-51168.1	21.32	64497.8
21.34	9.24722	21.34	95712.6	21.34	103897	21.34	-51257.2	21.34	64445.3
21.36	7.28309	21.36	97087.7	21.36	106677	21.36	-49852.8	21.36	64392
21.38	2.54173	21.38	98713.7	21.38	110887	21.38	-47268.6	21.38	64337.8
21.4	0.18742	21.4	100615	21.4	112680	21.4	-47377.3	21.4	64282.8
21.42	0.2203	21.42	102819	21.42	114386	21.42	-47874.7	21.42	64227
21.44	0.2967	21.44	105356	21.44	115822	21.44	-48975.4	21.44	64170.4
21.46	0.35084	21.46	108258	21.46	119811	21.46	-47888.5	21.46	64112.9
21.48	43.728	21.48	111557	21.48	122676	21.48	-48322.9	21.48	64054.6
21.5	205.529	21.5	115290	21.5	126479	21.5	-48253.1	21.5	63995.5
21.52	286.932	21.52	119492	21.52	128637	21.52	-50296.8	21.52	63935.6
21.54	356.238	21.54	124198	21.54	133442	21.54	-50197.7	21.54	63874.8
21.56	471.275	21.56	129441	21.56	140717	21.56	-48165.4	21.56	63813.2
21.58	538.382	21.58	135252	21.58	144926	21.58	-49768.1	21.58	63750.8
21.6	601.725	21.6	141656	21.6	147673	21.6	-53425	21.6	63687.6
21.62	676.985	21.62	148672	21.62	153003	21.62	-55111	21.62	63623.6
21.64	767.36	21.64	156308	21.64	162080	21.64	-53670.2	21.64	63558.7
21.66	877.209	21.66	164560	21.66	165880	21.66	-58122.4	21.66	63493
21.68	1012.58	21.68	173408	21.68	173060	21.68	-59790	21.68	63426.6
21.7	1182.11	21.7	182809	21.7	181973	21.7	-60277.5	21.7	63359.3
21.72	1398.42	21.72	192696	21.72	188478	21.72	-63659.8	21.72	63291.2
21.74	1680.67	21.74	202969	21.74	199117	21.74	-63293.4	21.74	63222.2
21.76	2059.97	21.76	213494	21.76	208598	21.76	-64337.9	21.76	63152.5
21.78	2595.81	21.78	224099	21.78	215679	21.78	-67862.1	21.78	63082
21.8	3400.95	21.8	234576	21.8	225198	21.8	-68820.1	21.8	63010.7
21.82	4589.31	21.82	244684	21.82	232873	21.82	-71252.5	21.82	62938.5
21.84	6354.95	21.84	254162	21.84	243596	21.84	-70007.3	21.84	62865.6
21.86	9625.2	21.86	262740	21.86	250548	21.86	-71633.8	21.86	62791.9
21.88	18758.4	21.88	270158	21.88	257951	21.88	-71648.5	21.88	62717.3
21.9	59056.2	21.9	276180	21.9	266183	21.9	-69438.1	21.9	62642
21.92	169459	21.92	280608	21.92	274030	21.92	-66020	21.92	62565.9
21.94	227300	21.94	283296	21.94	274827	21.94	-67910.3	21.94	62489
21.96	140859	21.96	284155	21.96	277852	21.96	-65744.8	21.96	62411.4
21.98	126250	21.98	283165	21.98	281578	21.98	-61028.2	21.98	62332.9
22	108787	22	280376	22	278927	22	-60891.3	22	62253.7
22.02	45300.5	22.02	275912	22.02	277763	22.02	-57590.9	22.02	62173.7
22.04	15335.5	22.04	269959	22.04	272819	22.04	-56581.7	22.04	62092.9
22.06	7783.07	22.06	262757	22.06	267446	22.06	-54752.4	22.06	62011.4
22.08	5191.89	22.08	254579	22.08	259248	22.08	-54772.5	22.08	61929.1
22.1	3771.11	22.1	245709	22.1	252706	22.1	-52444.3	22.1	61846
22.12	2877.3	22.12	236422	22.12	241414	22.12	-54449.5	22.12	61762.2
22.14	2279.05	22.14	226967	22.14	231688	22.14	-54720.7	22.14	61677.6
22.16	1862.53	22.16	217555	22.16	222051	22.16	-54945.1	22.16	61592.3
22.18	1567.96	22.18	208353	22.18	214376	22.18	-53418.7	22.18	61506.2
22.2	1367.26	22.2	199483	22.2	204897	22.2	-54028.3	22.2	61419.4
22.22	1286.48	22.22	191024	22.22	195269	22.22	-55196.8	22.22	61331.8
22.24	1601.07	22.24	183015	22.24	183307	22.24	-59150.4	22.24	61243.5
22.26	2775.27	22.26	175467	22.26	176512	22.26	-58397	22.26	61154.5
22.28	3427.57	22.28	168365	22.28	166352	22.28	-61453.9	22.28	61064.8
22.3	2312.06	22.3	161678	22.3	160717	22.3	-60402.3	22.3	60974.3
22.32	2029.54	22.32	155368	22.32	153344	22.32	-61465.1	22.32	60883.1
22.34	1847.3	22.34	149396	22.34	146650	22.34	-62187.9	22.34	60791.3
22.36	1033.18	22.36	143729	22.36	141603	22.36	-61568	22.36	60698.7
22.38	479.561	22.38	138342	22.38	134783	22.38	-62999.8	22.38	60605.4
22.4	244.373	22.4	133217	22.4	130992	22.4	-61666.6	22.4	60511.4
22.42	184.445	22.42	128348	22.42	126375	22.42	-61414	22.42	60416.7
22.44	86.6889	22.44	123732	22.44	120565	22.44	-62608.5	22.44	60321.4
22.46	34.5481	22.46	119372	22.46	116445	22.46	-62368.5	22.46	60225.3
22.48	27.1267	22.48	115270	22.48	111081	22.48	-63630.5	22.48	60128.6
22.5	21.8885	22.5	111426	22.5	109761	22.5	-61107	22.5	60031.3
22.52	18.0475	22.52	107839	22.52	105954	22.52	-61326.5	22.52	59933.2
22.54	15.1439	22.54	104503	22.54	103337	22.54	-60607.1	22.54	59834.6
22.56	12.8936	22.56	101410	22.56	100295	22.56	-60556.1	22.56	59735.2
22.58	11.1133	22.58	98550.2	22.58	96686.9	22.58	-61305	22.58	59635.3
22.6	9.67987	22.6	95911.8	22.6	95588.9	22.6	-59764.5	22.6	59534.6
22.62	8.50831	22.62	93481.5	22.62	92362.8	22.62	-60560.4	22.62	59433.4
22.64	7.53822	22.64	91245.9	22.64	91969.6	22.64	-58718	22.64	59331.6
22.66	6.72573	22.66	89191.5	22.66	91381.2	22.66	-57252	22.66	59229.1
22.68	6.03833	22.68	87305	22.68	90328.2	22.68	-56418.4	22.68	59126
22.7	5.43471	22.7	85573.7	22.7	90642.7	22.7	-54372.7	22.7	59022.3
22.72	3.70061	22.72	83985.5	22.72	89966.5	22.72	-53460.7	22.72	58918
22.74	2.05313	22.74	82528.8	22.74	88172	22.74	-53798.5	22.74	58813.2
22.76	1.79038	22.76	81192.8	22.76	85895.1	22.76	-54739.4	22.76	58707.8
22.78	0.96423	22.78	79967.4	22.78	82732.6	22.78	-56676.5	22.78	58601.7
22.8	0.42521	22.8	78843.2	22.8	82643.2	22.8	-55641.6	22.8	58495.2
22.82	0.47415	22.82	77811.2	22.82	79492.4	22.82	-57760.5	22.82	58388
22.84	0.53207	22.84	76863.5	22.84	78328.8	22.84	-57976.4	22.84	58280.4
22.86	0.60135	22.86	75992.2	22.86	76617.7	22.86	-58816.2	22.86	58172.2
22.88	0.68515	22.88	75186.9	22.88	76706.6	22.88	-57922	22.88	58063.4
22.9	0.78786	22.9	74440.7	22.9	74946.1	22.9	-58936.2	22.9	57954.1
22.92	0.91566	22.92	73747.8	22.92	75197	22.92	-57992.5	22.92	57844.4
22.94	1.07746	22.94	73101.8	22.94	75041.9	22.94	-57501.6	22.94	57734.1
22.96	1.28657	22.96	72498.1	22.96	73596.9	22.96	-58342.9	22.96	57623.3
22.98	1.5635	22.98	71933.1	22.98	72502.5	22.98	-58872.3	22.98	57512
23	1.94128	23	71403.3	23	71978	23	-58867	23	57400.3
23.02	2.47585	23.02	70905.6	23.02	70116.8	23.02	-60230.5	23.02	57288
23.04	3.26806	23.04	70437.2	23.04	70544.6	23.04	-59334.3	23.04	57175.4
23.06	4.51506	23.06	69995.4	23.06	69477	23.06	-59960.1	23.06	57062.2
23.08	6.66664	23.08	69577.5	23.08	69967.5	23.08	-59051.7	23.08	56948.7
23.1	11.6126	23.1	69180.8	23.1	70087.6	23.1	-58534.9	23.1	56834.7
23.12	31.9318	23.12	68802.8	23.12	69243.1	23.12	-59001.3	23.12	56720.2
23.14	102.717	23.14	68440.7	23.14	69218.4	23.14	-58664	23.14	56605.4
23.16	186.845	23.16	68092.3	23.16	68326.6	23.16	-59207.4	23.16	56490.1
23.18	134.184	23.18	67755.1	23.18	67010.9	23.18	-60185.9	23.18	56374.5
23.2	91.6099	23.2	67427.3	23.2	66854.1	23.2	-60014.8	23.2	56258.5
23.22	102.927	23.22	67107.4	23.22	65107.3	23.22	-61441.8	23.22	56142.1
23.24	60.6692	23.24	66794.8	23.24	68753.8	23.24	-57482.7	23.24	56025.3
23.26	20.8956	23.26	66489.3	23.26	67228.1	23.26	-58702.9	23.26	55908.2
23.28	8.33304	23.28	66191.5	23.28	66824.4	23.28	-58808.7	23.28	55790.8
23.3	5.0277	23.3	65899.2	23.3	64703.1	23.3	-60637.8	23.3	55673
23.32	3.52676	23.32	65611.7	23.32	65065	23.32	-59988.4	23.32	55554.9
23.34	2.62552	23.34	65330.5	23.34	63659.3	23.34	-61112.8	23.34	55436.4
23.36	2.03498	23.36	65055.4	23.36	64833.8	23.36	-59663.3	23.36	55317.7
23.38	1.62582	23.38	64787.1	23.38	64541.2	23.38	-59687.6	23.38	55198.7
23.4	1.33005	23.4	64527.1	23.4	64309.9	23.4	-59658.9	23.4	55079.5
23.42	1.109	23.42	64276.5	23.42	63985.3	23.42	-59732.8	23.42	54959.9
23.44	0.93926	23.44	64036.4	23.44	62869.5	23.44	-60608.6	23.44	54840.1
23.46	0.806	23.46	63807.6	23.46	63541.9	23.46	-59707.4	23.46	54720.1
23.48	0.6994	23.48	63590.9	23.48	62939.6	23.48	-60093	23.48	54599.8
23.5	0.61275	23.5	63386.8	23.5	62543.7	23.5	-60284.7	23.5	54479.3
23.52	0.54135	23.52	63195.7	23.52	63722.1	23.52	-58915.2	23.52	54358.6
23.54	0.48179	23.54	63017.9	23.54	63857.7	23.54	-58601.8	23.54	54237.7
23.56	0.43159	23.56	62853.8	23.56	60741.3	23.56	-61554.2	23.56	54116.6
23.58	0.38888	23.58	62703.6	23.58	62740.4	23.58	-59404.8	23.58	53995.4
23.6	0.30735	23.6	62567.7	23.6	60735.2	23.6	-61274.1	23.6	53874
23.62	0.16323	23.62	62446.2	23.62	61278.9	23.62	-60609	23.62	53752.4
23.64	0.11523	23.64	62339.6	23.64	62293.9	23.64	-59487.4	23.64	53630.7
23.66	0.07858	23.66	62248.3	23.66	62162.8	23.66	-59527.2	23.66	53508.9
23.68	0.01438	23.68	62172.8	23.68	62520.7	23.68	-59093.7	23.68	53386.9
23.7	0	23.7	62113.6	23.7	61305.8	23.7	-60249.5	23.7	53264.9
23.72	0	23.72	62071.5	23.72	61956.2	23.72	-59556.9	23.72	53142.7
23.74	0	23.74	62047.4	23.74	60352.2	23.74	-61136.8	23.74	53020.5
23.76	0	23.76	62042.3	23.76	61121.7	23.76	-60362.3	23.76	52898.3
23.78	0	23.78	62057.6	23.78	60685.5	23.78	-60813.8	23.78	52775.9
23.8	0	23.8	62094.7	23.8	61119.7	23.8	-60416.7	23.8	52653.6
23.82	0	23.82	62155.5	23.82	62408.2	23.82	-59189	23.82	52531.2
23.84	0	23.84	62241.9	23.84	60981	23.84	-60702.5	23.84	52408.8
23.86	0	23.86	62356.3	23.86	62061.6	23.86	-59736.4	23.86	52286.4
23.88	0	23.88	62501.7	23.88	62550	23.88	-59393.3	23.88	52164
23.9	0	23.9	62681	23.9	63555.3	23.9	-58567.3	23.9	52041.6
23.92	0	23.92	62897.8	23.92	62227.5	23.92	-60111.9	23.92	51919.3
23.94	0	23.94	63156	23.94	62487.2	23.94	-60110.4	23.94	51797
23.96	0.03862	23.96	63460	23.96	63464.1	23.96	-59437.6	23.96	51674.7
23.98	9.63488	23.98	63814.7	23.98	62460.9	23.98	-60795.5	23.98	51552.6
24	22.7199	24	64225.2	24	63119.4	24	-60547.4	24	51430.5
24.02	26.0854	24.02	64697.1	24.02	64394.4	24.02	-59744.4	24.02	51308.6
24.04	33.082	24.04	65236.6	24.04	65416.1	24.04	-59262.1	24.04	51186.7
24.06	42.9772	24.06	65849.9	24.06	65847.6	24.06	-59444	24.06	51065
24.08	81.4296	24.08	66543.8	24.08	64738.6	24.08	-61246.9	24.08	50943.4
24.1	146.187	24.1	67325.1	24.1	66350.4	24.1	-60416.4	24.1	50822
24.12	171.535	24.12	68200.8	24.12	68045.8	24.12	-59596.7	24.12	50700.7
24.14	204.967	24.14	69177.9	24.14	68151	24.14	-60468.5	24.14	50579.6
24.16	258.124	24.16	70263.3	24.16	70343.8	24.16	-59361.2	24.16	50458.7
24.18	296.713	24.18	71463.6	24.18	70894.1	24.18	-60011.2	24.18	50338
24.2	335.989	24.2	72785	24.2	72033.9	24.2	-60192.8	24.2	50217.6
24.22	383.965	24.22	74232.9	24.22	73839.1	24.22	-59835.5	24.22	50097.3
24.24	443.554	24.24	75812	24.24	75314.7	24.24	-59939	24.24	49977.3
24.26	519.075	24.26	77525.5	24.26	76781.2	24.26	-60185.9	24.26	49857.5
24.28	617.206	24.28	79375.3	24.28	77281.4	24.28	-61535.5	24.28	49738.1
24.3	748.826	24.3	81361	24.3	80449.1	24.3	-60353.6	24.3	49618.8
24.32	932.883	24.32	83479.8	24.32	80849.9	24.32	-62071.5	24.32	49499.9
24.34	1205.64	24.34	85725.5	24.34	82566.1	24.34	-62601.1	24.34	49381.3
24.36	1658.5	24.36	88087.8	24.36	87344	24.36	-60185.5	24.36	49263
24.38	2785.73	24.38	90551.5	24.38	89354.2	24.38	-60639	24.38	49145
24.4	7098.53	24.4	93095.1	24.4	91224.3	24.4	-61312.4	24.4	49027.4
24.42	17428.9	24.42	95690.2	24.42	93445.7	24.42	-61686.2	24.42	48910.2
24.44	21587.7	24.44	98300.5	24.44	95855.1	24.44	-61887	24.44	48793.3
24.46	14507.1	24.46	100881	24.46	101889	24.46	-58433.8	24.46	48676.7
24.48	16476.1	24.48	103378	24.48	101537	24.48	-61283	24.48	48560.6
24.5	31265.8	24.5	105731	24.5	103767	24.5	-61406.1	24.5	48444.9
24.52	65538.9	24.52	107875	24.52	108230	24.52	-59086.2	24.52	48329.6
24.54	87476.9	24.54	109740	24.54	109356	24.54	-59826.1	24.54	48214.7
24.56	52384	24.56	111264	24.56	108532	24.56	-62173.9	24.56	48100.2
24.58	40444.7	24.58	112389	24.58	111952	24.58	-59879.1	24.58	47986.3
24.6	46943.2	24.6	113074	24.6	112225	24.6	-60291	24.6	47872.7
24.62	26411.5	24.62	113294	24.62	113684	24.62	-59051.7	24.62	47759.7
24.64	9156.01	24.64	113045	24.64	114414	24.64	-58072.4	24.64	47647.1
24.66	3865.91	24.66	112342	24.66	114876	24.66	-56908	24.66	47535.1
24.68	2428.79	24.68	111222	24.68	113968	24.68	-56695.5	24.68	47423.5
24.7	1757.95	24.7	109732	24.7	111881	24.7	-57292.7	24.7	47312.5
24.72	1357.88	24.72	107931	24.72	111311	24.72	-56061.6	24.72	47202
24.74	1107.48	24.74	105882	24.74	109393	24.74	-55930.7	24.74	47092
24.76	958.921	24.76	103646	24.76	107591	24.76	-55496.7	24.76	46982.6
24.78	919.489	24.78	101281	24.78	105389	24.78	-55333.4	24.78	46873.8
24.8	1221.32	24.8	98836.3	24.8	102242	24.8	-56036.1	24.8	46765.6
24.82	2601.16	24.82	96353.8	24.82	98966.6	24.82	-56828.8	24.82	46657.9
24.84	4488.39	24.84	93866.3	24.84	96158.6	24.84	-57149.4	24.84	46550.8
24.86	3439.94	24.86	91399.1	24.86	94694.5	24.86	-56146.3	24.86	46444.4
24.88	2156.57	24.88	88970.6	24.88	92218.3	24.88	-56194	24.88	46338.6
24.9	2472.33	24.9	86594.2	24.9	86730.8	24.9	-59305	24.9	46233.3
24.92	1939.79	24.92	84279.7	24.92	84367.3	24.92	-59354	24.92	46128.8
24.94	866.201	24.94	82034.5	24.94	84540.3	24.94	-56935.9	24.94	46024.9
24.96	414.317	24.96	79864.8	24.96	80286.1	24.96	-59020.4	24.96	45921.6
24.98	265.666	24.98	77775.7	24.98	75698.6	24.98	-61518.8	24.98	45819
25	159.842	25	75772.1	25	74607.7	25	-60606.1	25	45717.1
25.02	117.167	25.02	73858.3	25.02	72909	25.02	-60391	25.02	45615.9
25.04	88.3693	25.04	72038	25.04	70128.9	25.04	-61350.8	25.04	45515.4
25.06	48.22	25.06	70313.8	25.06	68192.2	25.06	-61563.3	25.06	45415.6
25.08	31.3416	25.08	68687.7	25.08	66913.4	25.08	-61216	25.08	45316.5
25.1	26.0227	25.1	67160.3	25.1	65788.2	25.1	-60813.7	25.1	45218.1
25.12	21.9651	25.12	65731	25.12	63970.8	25.12	-61201.8	25.12	45120.5
25.14	18.7962	25.14	64398.2	25.14	62600.4	25.14	-61239.4	25.14	45023.6
25.16	16.2722	25.16	63159.4	25.16	62997.2	25.16	-59603.9	25.16	44927.4
25.18	14.228	25.18	62011.3	25.18	60058.2	25.18	-61394.8	25.18	44832
25.2	12.5487	25.2	60949.8	25.2	59716.7	25.2	-60674.8	25.2	44737.4
25.22	11.1517	25.22	59970.5	25.22	59670	25.22	-59742.2	25.22	44643.6
25.24	9.9769	25.24	59068.8	25.24	59204.2	25.24	-59306.3	25.24	44550.5
25.26	8.97926	25.26	58240.2	25.26	57557.5	25.26	-60124.4	25.26	44458.2
25.28	7.77762	25.28	57479.8	25.28	57549.2	25.28	-59372.3	25.28	44366.7
25.3	4.66773	25.3	56783.5	25.3	55802.3	25.3	-60422.8	25.3	44276
25.32	2.68889	25.32	56146.8	25.32	55943.1	25.32	-59645.4	25.32	44186.1
25.34	2.37091	25.34	55566	25.34	55241	25.34	-59766.6	25.34	44097.1
25.36	1.06595	25.36	55037.3	25.36	54242.4	25.36	-60236.6	25.36	44008.8
25.38	0.0149	25.38	54557.6	25.38	55648.4	25.38	-58350.8	25.38	43921.4
25.4	0	25.4	54123.8	25.4	54528.6	25.4	-59036.9	25.4	43834.9
25.42	0	25.42	53733.3	25.42	53446.8	25.42	-59728.2	25.42	43749.1
25.44	0	25.44	53383.9	25.44	52762.9	25.44	-60062.7	25.44	43664.2
25.46	0	25.46	53073.6	25.46	52885.8	25.46	-59629.5	25.46	43580.2
25.48	0	25.48	52800.8	25.48	53088.3	25.48	-59154.1	25.48	43497
25.5	0	25.5	52564	25.5	53022.3	25.5	-58983.4	25.5	43414.7
25.52	0	25.52	52362.4	25.52	52532.5	25.52	-59271.5	25.52	43333.2
25.54	0	25.54	52194.9	25.54	52450.6	25.54	-59185.9	25.54	43252.6
25.56	0.11877	25.56	52060.9	25.56	51170.5	25.56	-60332	25.56	43172.9
25.58	10.2631	25.58	51960.1	25.58	51759.9	25.58	-59641.9	25.58	43094.1
25.6	23.2618	25.6	51892.1	25.6	50396.3	25.6	-60937.5	25.6	43016.1
25.62	26.5368	25.62	51856.8	25.62	51129.1	25.62	-60169.3	25.62	42939.1
25.64	32.4084	25.64	51854.2	25.64	51469.4	25.64	-59826.5	25.64	42862.9
25.66	42.6359	25.66	51884.2	25.66	50371.1	25.66	-60954.8	25.66	42787.6
25.68	49.0488	25.68	51946.8	25.68	51007.8	25.68	-60380.7	25.68	42713.2
25.7	54.7371	25.7	52041.9	25.7	52513.2	25.7	-58970.4	25.7	42639.7
25.72	61.4803	25.72	52169.4	25.72	51258.5	25.72	-60352.6	25.72	42567.1
25.74	69.5577	25.74	52329.1	25.74	50449.8	25.74	-61321.1	25.74	42495.4
25.76	79.3476	25.76	52520.6	25.76	50021.6	25.76	-61940.6	25.76	42424.6
25.78	91.3734	25.78	52743.1	25.78	50825.5	25.78	-61359.3	25.78	42354.7
25.8	106.376	25.8	52995.7	25.8	51187.5	25.8	-61249.8	25.8	42285.8
25.82	125.431	25.82	53276.7	25.82	50297.2	25.82	-62421.2	25.82	42217.7
25.84	150.152	25.84	53584.3	25.84	51020.6	25.84	-62005.3	25.84	42150.5
25.86	183.046	25.86	53915.4	25.86	51454.2	25.86	-61902.9	25.86	42084.3
25.88	228.185	25.88	54266.5	25.88	49465.1	25.88	-64243	25.88	42018.9
25.9	292.54	25.9	54632.7	25.9	51131.1	25.9	-62943.3	25.9	41954.5
25.92	388.854	25.92	55008.1	25.92	52466.3	25.92	-61983.4	25.92	41891
25.94	542.539	25.94	55385.3	25.94	53283.1	25.94	-61543.9	25.94	41828.4
25.96	817.041	25.96	55755.9	25.96	52460	25.96	-62737.5	25.96	41766.7
25.98	1539.59	25.98	56109.8	25.98	55281.4	25.98	-60270.1	25.98	41705.9
26	4625.35	26	56436.2	26	55164.5	26	-60713.4	26	41646
26.02	13588.4	26.02	56723.2	26.02	57225	26.02	-58939.9	26.02	41587
26.04	20415.2	26.04	56959.1	26.04	56812.7	26.04	-59588.1	26.04	41529
26.06	12528	26.06	57132.7	26.06	58082.5	26.06	-58491.9	26.06	41471.8
26.08	8454.88	26.08	57234	26.08	58972.3	26.08	-57703.4	26.08	41415.6
26.1	10958.9	26.1	57255.2	26.1	60009.2	26.1	-56687.7	26.1	41360.2
26.12	7744.84	26.12	57191.4	26.12	60665.1	26.12	-55968	26.12	41305.7
26.14	2881.22	26.14	57040.9	26.14	60593.7	26.14	-55888.8	26.14	41252.1
26.16	1055.21	26.16	56805.3	26.16	61736	26.16	-54511	26.16	41199.5
26.18	593.534	26.18	56489.3	26.18	58554.9	26.18	-57376.1	26.18	41147.7
26.2	409.73	26.2	56100.6	26.2	59807.3	26.2	-55735	26.2	41096.8
26.22	302.978	26.22	55648.6	26.22	57670.8	26.22	-57419.4	26.22	41046.7
26.24	233.834	26.24	55144.3	26.24	55339	26.24	-59246.9	26.24	40997.6
26.26	186.289	26.26	54599.1	26.26	54377.4	26.26	-59663.3	26.26	40949.3
26.28	152.103	26.28	54024.1	26.28	54239.8	26.28	-59226	26.28	40901.9
26.3	126.65	26.3	53430.1	26.3	52697.5	26.3	-60174.3	26.3	40855.3
26.32	107.162	26.32	52826.6	26.32	52022.5	26.32	-60245.7	26.32	40809.6
26.34	91.8928	26.34	52221.8	26.34	49950.4	26.34	-61713.1	26.34	40764.8
26.36	79.6981	26.36	51622.8	26.36	50043.3	26.36	-61021.1	26.36	40720.8
26.38	69.7981	26.38	51035	26.38	50169.6	26.38	-60307.1	26.38	40677.6
26.4	61.6474	26.4	50462.3	26.4	48970.3	26.4	-60933.6	26.4	40635.3
26.42	54.8542	26.42	49907.9	26.42	48951.4	26.42	-60398.1	26.42	40593.8
26.44	49.1315	26.44	49374.5	26.44	47089.6	26.44	-61726.5	26.44	40553.1
26.46	44.2643	26.46	48863.5	26.46	47688.4	26.46	-60616.8	26.46	40513.3
26.48	37.6319	26.48	48376.1	26.48	47526.8	26.48	-60290.9	26.48	40474.2
26.5	22.0417	26.5	47912.7	26.5	46394.2	26.5	-60960.2	26.5	40436
26.52	13.3816	26.52	47473.8	26.52	46343.8	26.52	-60571.7	26.52	40398.5
26.54	11.9662	26.54	47058.1	26.54	46736.8	26.54	-59763	26.54	40361.8
26.56	5.83391	26.56	46665.1	26.56	47353.8	26.56	-58753	26.56	40325.9
26.58	0.21852	26.58	46294.4	26.58	47786.8	26.58	-57949.2	26.58	40290.8
26.6	0	26.6	45945.1	26.6	46873.1	26.6	-58513.7	26.6	40256.4
26.62	0	26.62	45616.2	26.62	46991.1	26.62	-58066.8	26.62	40222.8
26.64	0	26.64	45306.7	26.64	50795	26.64	-53953.4	26.64	40190
26.66	0	26.66	45016.1	26.66	61629.2	26.66	-42828.5	26.66	40157.8
26.68	0	26.68	44743.3	26.68	56262.4	26.68	-47922.6	26.68	40126.4
26.7	0	26.7	44487.7	26.7	48287.7	26.7	-55641.7	26.7	40095.7
26.72	0	26.72	44248.3	26.72	49381.2	26.72	-54308.8	26.72	40065.8
26.74	0	26.74	44024.3	26.74	51645.2	26.74	-51820.8	26.74	40036.5
26.76	0	26.76	43815	26.76	45353.3	26.76	-57903.3	26.76	40007.9
26.78	0	26.78	43619.6	26.78	44489.4	26.78	-58571.9	26.78	39980
26.8	0	26.8	43437.3	26.8	43540.3	26.8	-59338.7	26.8	39952.7
26.82	0	26.82	43267.6	26.82	43061.2	26.82	-59648	26.82	39926.1
26.84	0	26.84	43109.8	26.84	43404.8	26.84	-59146.7	26.84	39900.1
26.86	0	26.86	42963.4	26.86	43178.2	26.86	-59226.9	26.86	39874.8
26.88	0	26.88	42827.7	26.88	43376.3	26.88	-58893.1	26.88	39850.1
26.9	0	26.9	42701.4	26.9	43445	26.9	-58698.1	26.9	39826
26.92	0	26.92	42583.8	26.92	43268.9	26.92	-58756.6	26.92	39802.5
26.94	0	26.94	42474.7	26.94	42250.5	26.94	-59665.9	26.94	39779.6
26.96	0	26.96	42373.3	26.96	43634.8	26.96	-58180.2	26.96	39757.2
26.98	0	26.98	42278.9	26.98	42882.8	26.98	-58837.7	26.98	39735.4
27	0	27	42191.1	27	42515.9	27	-59116.9	27	39714.2
27.02	0	27.02	42109.7	27.02	41505.1	27.02	-60046.3	27.02	39693.5
27.04	0	27.04	42033.6	27.04	41744.9	27.04	-59730.3	27.04	39673.3
27.06	0	27.06	41961.7	27.06	42816.2	27.06	-58587.2	27.06	39653.6
27.08	0	27.08	41894	27.08	41343.5	27.08	-59992.1	27.08	39634.5
27.1	0	27.1	41830	27.1	42478.1	27.1	-58793.6	27.1	39615.8
27.12	0	27.12	41769.2	27.12	41809	27.12	-59401.9	27.12	39597.6
27.14	0	27.14	41711.1	27.14	41964.1	27.14	-59188.7	27.14	39579.8
27.16	0	27.16	41655.7	27.16	41667.9	27.16	-59429.4	27.16	39562.5
27.18	0	27.18	41602.7	27.18	41263.8	27.18	-59780.7	27.18	39545.6
27.2	0	27.2	41552.2	27.2	41253.9	27.2	-59740	27.2	39529.1
27.22	0	27.22	41503.9	27.22	42381.3	27.22	-58564.3	27.22	39513
27.24	0	27.24	41457.9	27.24	41551.8	27.24	-59347.8	27.24	39497.3
27.26	0	27.26	41413.9	27.26	41931.1	27.26	-58924.5	27.26	39482
27.28	0	27.28	41372	27.28	43223.4	27.28	-57590.3	27.28	39467.1
27.3	0	27.3	41332.1	27.3	42295.5	27.3	-58478.3	27.3	39452.4
27.32	0	27.32	41294.2	27.32	41377.1	27.32	-59358.7	27.32	39438.2
27.34	0	27.34	41258.1	27.34	40972.6	27.34	-59727.1	27.34	39424.2
27.36	0	27.36	41223.9	27.36	41023.8	27.36	-59641.8	27.36	39410.5
27.38	0	27.38	41191.5	27.38	40220.3	27.38	-60412.9	27.38	39397.1
27.4	0	27.4	41160.8	27.4	41754.3	27.4	-58848.2	27.4	39384
27.42	0	27.42	41132	27.42	40551.8	27.42	-60021.9	27.42	39371.1
27.44	0.05456	27.44	41104.9	27.44	40916.2	27.44	-59630.4	27.44	39358.5
27.46	1.82058	27.46	41079.6	27.46	40776.7	27.46	-59744.5	27.46	39346
27.48	3.87248	27.48	41055.9	27.48	40170.5	27.48	-60327	27.48	39333.8
27.5	4.36946	27.5	41033.6	27.5	40038.6	27.5	-60436.7	27.5	39321.8
27.52	5.14332	27.52	41012.7	27.52	41893.4	27.52	-58561	27.52	39310
27.54	6.79412	27.54	40993.1	27.54	41133.3	27.54	-59301.5	27.54	39298.3
27.56	8.00373	27.56	40974.9	27.56	40318.8	27.56	-60097.7	27.56	39286.7
27.58	8.91553	27.58	40957.8	27.58	40759.3	27.58	-59640.1	27.58	39275.3
27.6	9.99337	27.6	40941.8	27.6	41322.7	27.6	-59060.7	27.6	39264
27.62	11.2804	27.62	40926.9	27.62	40470.6	27.62	-59898	27.62	39252.8
27.64	12.8346	27.64	40913.2	27.64	40224.9	27.64	-60129.9	27.64	39241.7
27.66	14.7361	27.66	40900.5	27.66	40414.1	27.66	-59928.1	27.66	39230.6
27.68	17.0972	27.68	40888.9	27.68	41763.4	27.68	-58567.2	27.68	39219.6
27.7	20.0799	27.7	40878.4	27.7	39327.8	27.7	-60992.2	27.7	39208.6
27.72	23.925	27.72	40868.8	27.72	40723.6	27.72	-59586.9	27.72	39197.6
27.74	29.0027	27.74	40860.3	27.74	39626.5	27.74	-60675.5	27.74	39186.6
27.76	35.9067	27.76	40852.9	27.76	41308.5	27.76	-58986.1	27.76	39175.7
27.78	45.6377	27.78	40846.4	27.78	40150.2	27.78	-60137.8	27.78	39164.6
27.8	59.9904	27.8	40841	27.8	40611.8	27.8	-59670.8	27.8	39153.6
27.82	82.4476	27.82	40836.6	27.82	41194.1	27.82	-59084.2	27.82	39142.4
27.84	120.994	27.84	40833.2	27.84	40138.1	27.84	-60136.7	27.84	39131.2
27.86	209.833	27.86	40830.9	27.86	39717.4	27.86	-60555.2	27.86	39119.9
27.88	564.857	27.88	40829.6	27.88	40419.7	27.88	-59851.6	27.88	39108.5
27.9	1768.92	27.9	40829.4	27.9	40505.3	27.9	-59765.7	27.9	39096.9
27.92	3300.09	27.92	40830.3	27.92	41076.9	27.92	-59195.1	27.92	39085.3
27.94	2458.86	27.94	40832.3	27.94	40600.8	27.94	-59673.2	27.94	39073.4
27.96	1285.33	27.96	40835.5	27.96	40373.8	27.96	-59903.3	27.96	39061.4
27.98	1522.94	27.98	40839.9	27.98	40701.3	27.98	-59580.3	27.98	39049.2
28	1688.67	28	40845.5	28	40635.7	28	-59651.5	28	39036.7
28.02	837.074	28.02	40852.5	28.02	39558.3	28.02	-60735.8	28.02	39024.1
28.04	284.4	28.04	40860.8	28.04	40705.9	28.04	-59596.5	28.04	39011.2
28.06	126.532	28.06	40870.5	28.06	39213.5	28.06	-61098.7	28.06	38998.1
28.08	80.7373	28.08	40881.7	28.08	40341.2	28.08	-59982.2	28.08	38984.6
28.1	57.9912	28.1	40894.6	28.1	40722.8	28.1	-59613.5	28.1	38971
28.12	43.9068	28.12	40909.2	28.12	41523.3	28.12	-58827.5	28.12	38957
28.14	34.4891	28.14	40925.6	28.14	40588.2	28.14	-59779	28.14	38942.7
28.16	27.8575	28.16	40943.9	28.16	40276.2	28.16	-60109.3	28.16	38928
28.18	22.9992	28.18	40964.3	28.18	40194.2	28.18	-60211.8	28.18	38913
28.2	19.3268	28.2	40987	28.2	40790.3	28.2	-59638.3	28.2	38897.7
28.22	16.4793	28.22	41012.1	28.22	40285.3	28.22	-60168.5	28.22	38882
28.24	14.2245	28.24	41039.9	28.24	41168.5	28.24	-59313.1	28.24	38865.9
28.26	12.4073	28.26	41070.5	28.26	40907.6	28.26	-59604.6	28.26	38849.4
28.28	10.9202	28.28	41104.2	28.28	40066.5	28.28	-60479.4	28.28	38832.5
28.3	9.68748	28.3	41141.2	28.3	39501.8	28.3	-61081.1	28.3	38815.1
28.32	8.65372	28.32	41181.9	28.32	41097	28.32	-59526.6	28.32	38797.3
28.34	7.77807	28.34	41226.6	28.34	42799.1	28.34	-57869.1	28.34	38779.1
28.36	7.02968	28.36	41275.5	28.36	41006.6	28.36	-59710.5	28.36	38760.4
28.38	5.24709	28.38	41329	28.38	41392.6	28.38	-59378.1	28.38	38741.2
28.4	2.79966	28.4	41387.6	28.4	40729.9	28.4	-60099.5	28.4	38721.5
28.42	2.15973	28.42	41451.7	28.42	40670.8	28.42	-60222.6	28.42	38701.3
28.44	1.8574	28.44	41521.6	28.44	41905.2	28.44	-59058	28.44	38680.5
28.46	0.77179	28.46	41597.8	28.46	41246.5	28.46	-59792.9	28.46	38659.2
28.48	0.00314	28.48	41680.8	28.48	41414	28.48	-59708.4	28.48	38637.4
28.5	0	28.5	41771.1	28.5	41367.4	28.5	-59845.3	28.5	38615
28.52	0	28.52	41869.2	28.52	41165.5	28.52	-60145.4	28.52	38592.1
28.54	0	28.54	41975.7	28.54	42031.2	28.54	-59386.1	28.54	38568.5
28.56	0	28.56	42091	28.56	42234	28.56	-59298.7	28.56	38544.4
28.58	0	28.58	42215.9	28.58	42041.5	28.58	-59616	28.58	38519.6
28.6	0.57218	28.6	42350.7	28.6	41835.4	28.6	-59957	28.6	38494.2
28.62	21.4536	28.62	42496.2	28.62	43045.4	28.62	-58892.4	28.62	38468.2
28.64	46.5159	28.64	42652.8	28.64	42821.2	28.64	-59273.2	28.64	38441.6
28.66	52.8047	28.66	42821	28.66	42737.7	28.66	-59525	28.66	38414.3
28.68	60.4059	28.68	43001.4	28.68	43245.8	28.68	-59197.3	28.68	38386.3
28.7	79.5581	28.7	43194.5	28.7	42856.9	28.7	-59779.3	28.7	38357.6
28.72	96.132	28.72	43400.7	28.72	44096.8	28.72	-58745.6	28.72	38328.3
28.74	106.922	28.74	43620.3	28.74	42961.1	28.74	-60100.8	28.74	38298.3
28.76	119.648	28.76	43853.5	28.76	44030	28.76	-59265.2	28.76	38267.6
28.78	134.803	28.78	44100.6	28.78	44365.1	28.78	-59177.2	28.78	38236.1
28.8	153.051	28.8	44361.5	28.8	43456.1	28.8	-60347.1	28.8	38204
28.82	175.3	28.82	44636	28.82	44354.5	28.82	-59723.2	28.82	38171.1
28.84	202.821	28.84	44923.8	28.84	45299.4	28.84	-59066.1	28.84	38137.4
28.86	237.455	28.86	45224.2	28.86	44248.6	28.86	-60417.3	28.86	38103.1
28.88	284.508	28.88	45536.2	28.88	46418.3	28.88	-58559.6	28.88	38067.9
28.9	346.402	28.9	45858.4	28.9	46190.1	28.9	-59110	28.9	38032
28.92	426.014	28.92	46189.1	28.92	46291.1	28.92	-59339.7	28.92	37995.4
28.94	536.69	28.94	46526	28.94	46019.2	28.94	-59948.4	28.94	37957.9
28.96	699.214	28.96	46866.3	28.96	47067.5	28.96	-59240.5	28.96	37919.7
28.98	948.071	28.98	47206.8	28.98	47151.7	28.98	-59496.8	28.98	37880.7
29	1360.76	29	47543.6	29	47569.5	29	-59415.8	29	37840.9
29.02	2221.41	29.02	47872.3	29.02	47028.7	29.02	-60285.2	29.02	37800.3
29.04	5339.33	29.04	48188.2	29.04	47062.3	29.04	-60567.5	29.04	37758.8
29.06	17060.1	29.06	48486.2	29.06	49546.6	29.06	-58381.3	29.06	37716.6
29.08	37256.3	29.08	48761.3	29.08	48505.4	29.08	-59697.6	29.08	37673.5
29.1	34424	29.1	49008.4	29.1	49375.5	29.1	-59074.6	29.1	37629.7
29.12	16992.4	29.12	49222.8	29.12	49926.1	29.12	-58738.5	29.12	37585
29.14	15356.2	29.14	49400.5	29.14	49156.2	29.14	-59686	29.14	37539.4
29.16	21589.7	29.16	49538.1	29.16	49829.6	29.16	-59150.1	29.16	37493.1
29.18	14503.6	29.18	49633.2	29.18	50367	29.18	-58707.9	29.18	37445.9
29.2	5424.57	29.2	49684.7	29.2	49755.4	29.2	-59371	29.2	37397.8
29.22	2101.21	29.22	49692.3	29.22	48913.8	29.22	-60220.2	29.22	37348.9
29.24	1271.61	29.24	49656.9	29.24	50252.6	29.24	-58845.9	29.24	37299.2
29.26	976.902	29.26	49580	29.26	50206.2	29.26	-58815.5	29.26	37248.6
29.28	880.188	29.28	49464	29.28	48999.3	29.28	-59906.4	29.28	37197.1
29.3	1111.66	29.3	49311.8	29.3	49295.7	29.3	-59457.8	29.3	37144.8
29.32	2454.44	29.32	49126.4	29.32	49160.6	29.32	-59407.5	29.32	37091.7
29.34	5223.34	29.34	48911.1	29.34	49190.8	29.34	-59161.9	29.34	37037.7
29.36	5396.19	29.36	48668.8	29.36	49480.4	29.36	-58630.1	29.36	36982.8
29.38	2813.8	29.38	48402.8	29.38	48879.6	29.38	-58964.9	29.38	36927.1
29.4	2203.75	29.4	48115.9	29.4	48808.3	29.4	-58749.3	29.4	36870.5
29.42	3129.66	29.42	47810.9	29.42	47789.9	29.42	-59462.6	29.42	36813.1
29.44	2436.86	29.44	47490.3	29.44	48769.5	29.44	-58162.5	29.44	36754.8
29.46	1040.27	29.46	47156.8	29.46	47145.3	29.46	-59453.2	29.46	36695.7
29.48	447.912	29.48	46813	29.48	46915.3	29.48	-59339.3	29.48	36635.7
29.5	288.982	29.5	46461.2	29.5	46130.2	29.5	-59772.7	29.5	36574.8
29.52	227.018	29.52	46104	29.52	46372.8	29.52	-59172.9	29.52	36513.1
29.54	186.429	29.54	45743.8	29.54	45685.3	29.54	-59500.1	29.54	36450.6
29.56	140.058	29.56	45382.8	29.56	44736.8	29.56	-60087.7	29.56	36387.2
29.58	112.64	29.58	45023.3	29.58	44348.9	29.58	-60116.1	29.58	36323
29.6	107.005	29.6	44667.3	29.6	44064.1	29.6	-60044.9	29.6	36257.9
29.62	101.502	29.62	44316.5	29.62	43470.7	29.62	-60287.5	29.62	36192
29.64	94.8991	29.64	43972.4	29.64	44300.6	29.64	-59113.5	29.64	36125.3
29.66	104.97	29.66	43636.3	29.66	42491.6	29.66	-60586.3	29.66	36057.7
29.68	130.742	29.68	43308.9	29.68	42371.5	29.68	-60379.1	29.68	35989.4
29.7	178.192	29.7	42991	29.7	43186.9	29.7	-59245.8	29.7	35920.2
29.72	293.179	29.72	42682.9	29.72	42208.2	29.72	-59916.4	29.72	35850.2
29.74	757.093	29.74	42384.7	29.74	41665.5	29.74	-60160.8	29.74	35779.4
29.76	2295.73	29.76	42096.3	29.76	42037.9	29.76	-59500.1	29.76	35707.8
29.78	4242.36	29.78	41817.3	29.78	42914.3	29.78	-58344.7	29.78	35635.4
29.8	3198.79	29.8	41547.5	29.8	42355.9	29.8	-58633.3	29.8	35562.2
29.82	1563.28	29.82	41286.3	29.82	41108.1	29.82	-59619.8	29.82	35488.2
29.84	1700.32	29.84	41033.2	29.84	41392.4	29.84	-59082.5	29.84	35413.5
29.86	2278.07	29.86	40787.7	29.86	40650.1	29.86	-59579.3	29.86	35338
29.88	1383.78	29.88	40549.4	29.88	41123.1	29.88	-58868	29.88	35261.7
29.9	497.279	29.9	40317.6	29.9	40186.1	29.9	-59573.2	29.9	35184.7
29.92	196.711	29.92	40091.7	29.92	41069	29.92	-58464.3	29.92	35107
29.94	118.009	29.94	39871.4	29.94	38942	29.94	-60371.1	29.94	35028.5
29.96	84.085	29.96	39656.7	29.96	39904.5	29.96	-59193.9	29.96	34949.3
29.98	64.3311	29.98	39447.4	29.98	39138.6	29.98	-59750.5	29.98	34869.3
30	51.9145	30	39243.4	30	39887.1	30	-58797.9	30	34788.7
30.02	43.2039	30.02	39044.6	30.02	39227.6	30.02	-59258.6	30.02	34707.4
30.04	36.9979	30.04	38851.2	30.04	39966.6	30.04	-58326.3	30.04	34625.4
30.06	32.5881	30.06	38663.2	30.06	39088.1	30.06	-59016.8	30.06	34542.7
30.08	29.477	30.08	38480.8	30.08	38740.3	30.08	-59182.2	30.08	34459.4
30.1	27.3681	30.1	38304	30.1	38865.8	30.1	-58879.9	30.1	34375.4
30.12	26.0913	30.12	38133	30.12	37797.8	30.12	-59776.8	30.12	34290.7
30.14	25.5676	30.14	37967.6	30.14	37646.4	30.14	-59762.9	30.14	34205.5
30.16	25.795	30.16	37808.1	30.16	37896.8	30.16	-59352.9	30.16	34119.6
30.18	26.8529	30.18	37654.4	30.18	36755.4	30.18	-60340.7	30.18	34033.1
30.2	28.9261	30.2	37506.5	30.2	37455	30.2	-59493.2	30.2	33946
30.22	32.3611	30.22	37364.5	30.22	36876.9	30.22	-59929.3	30.22	33858.3
30.24	37.1432	30.24	37228.3	30.24	37520.4	30.24	-59149.5	30.24	33770.1
30.26	43.2321	30.26	37098	30.26	38159	30.26	-58380.6	30.26	33681.3
30.28	56.2193	30.28	36973.4	30.28	36509.7	30.28	-59905.5	30.28	33592
30.3	81.802	30.3	36854.8	30.3	36405.2	30.3	-59891.2	30.3	33502.1
30.32	146.007	30.32	36742	30.32	36169.5	30.32	-60014.1	30.32	33411.7
30.34	409.43	30.34	36635.1	30.34	36997	30.34	-59079.7	30.34	33320.8
30.36	1208.37	30.36	36534.1	30.36	36164.4	30.36	-59811.3	30.36	33229.5
30.38	2020.28	30.38	36439.1	30.38	36726.8	30.38	-59154	30.38	33137.6
30.4	1373.6	30.4	36350.3	30.4	35537.7	30.4	-60254.3	30.4	33045.3
30.42	678.921	30.42	36267.7	30.42	36208.4	30.42	-59501	30.42	32952.6
30.44	808.181	30.44	36191.4	30.44	36158.6	30.44	-59474.5	30.44	32859.4
30.46	1062.44	30.46	36121.7	30.46	35923.8	30.46	-59639.6	30.46	32765.8
30.48	626.235	30.48	36058.7	30.48	35707.3	30.48	-59793.1	30.48	32671.8
30.5	223.644	30.5	36002.2	30.5	36218.4	30.5	-59225.5	30.5	32577.4
30.52	89.2675	30.52	35952.2	30.52	35183.4	30.52	-60210.5	30.52	32482.7
30.54	53.4603	30.54	35909	30.54	35566.7	30.54	-59784	30.54	32387.6
30.56	38.4012	30.56	35872.8	30.56	36788	30.56	-58526.4	30.56	32292.2
30.58	33.4894	30.58	35843.7	30.58	34796.9	30.58	-60488.4	30.58	32196.4
30.6	31.0652	30.6	35821.9	30.6	35926.9	30.6	-59336.7	30.6	32100.4
30.62	27.6013	30.62	35807.6	30.62	35991.5	30.62	-59257.8	30.62	32004
30.64	26.4662	30.64	35801.2	30.64	36434.7	30.64	-58808.2	30.64	31907.4
30.66	35.8038	30.66	35803.1	30.66	36929.6	30.66	-58315.1	30.66	31810.6
30.68	45.3777	30.68	35813.5	30.68	34871.2	30.68	-60383.9	30.68	31713.5
30.7	47.828	30.7	35832.7	30.7	36347.4	30.7	-58927	30.7	31616.2
30.72	51.303	30.72	35861.3	30.72	35795.1	30.72	-59507.8	30.72	31518.6
30.74	59.5624	30.74	35899.4	30.74	35401.8	30.74	-59939.3	30.74	31420.9
30.76	68.6214	30.76	35947.5	30.76	35919.9	30.76	-59469.3	30.76	31323
30.78	75.8731	30.78	36006	30.78	35784.6	30.78	-59663	30.78	31225
30.8	84.7523	30.8	36075.2	30.8	35791	30.8	-59725.8	30.8	31126.9
30.82	95.8097	30.82	36155.3	30.82	35698.6	30.82	-59898.4	30.82	31028.6
30.84	109.411	30.84	36246.8	30.84	36317.1	30.84	-59371.4	30.84	30930.2
30.86	126.016	30.86	36349.8	30.86	37085.8	30.86	-58705.7	30.86	30831.7
30.88	148.686	30.88	36464.6	30.88	35948	30.88	-59958.3	30.88	30733.2
30.9	184.502	30.9	36591.3	30.9	37173.1	30.9	-58859.9	30.9	30634.6
30.92	234.972	30.92	36729.9	30.92	36260.1	30.92	-59911.5	30.92	30536
30.94	299.341	30.94	36880.4	30.94	37135.9	30.94	-59186.1	30.94	30437.4
30.96	397.242	30.96	37042.5	30.96	36669.1	30.96	-59815.1	30.96	30338.8
30.98	578.48	30.98	37216.2	30.98	37229.2	30.98	-59428.7	30.98	30240.2
31	1113.7	31	37400.9	31	37207.4	31	-59635.2	31	30141.7
31.02	3036.2	31.02	37596.1	31.02	37925.9	31.02	-59111.9	31.02	30043.2
31.04	6786.46	31.04	37801.1	31.04	38554.5	31.04	-58688.2	31.04	29944.8
31.06	7440.89	31.06	38014.9	31.06	38408.4	31.06	-59048.1	31.06	29846.5
31.08	4883.95	31.08	38236.4	31.08	37762.9	31.08	-59915.2	31.08	29748.3
31.1	6919.54	31.1	38464.5	31.1	39433.7	31.1	-58472.4	31.1	29650.2
31.12	15151.6	31.12	38697.6	31.12	38736.6	31.12	-59402.7	31.12	29552.3
31.14	17461.2	31.14	38934.1	31.14	39406.2	31.14	-58969.5	31.14	29454.5
31.16	9099.21	31.16	39172.1	31.16	39401.3	31.16	-59212.5	31.16	29357
31.18	5056.09	31.18	39409.6	31.18	38441.9	31.18	-60409.4	31.18	29259.6
31.2	6954.56	31.2	39644.2	31.2	39714.9	31.2	-59371	31.2	29162.4
31.22	7507.72	31.22	39873.6	31.22	39944.6	31.22	-59370.7	31.22	29065.5
31.24	3864.29	31.24	40095.1	31.24	39562.2	31.24	-59974.6	31.24	28968.9
31.26	1553.93	31.26	40305.8	31.26	41284.8	31.26	-58462.6	31.26	28872.5
31.28	934.621	31.28	40502.7	31.28	40504.8	31.28	-59439.6	31.28	28776.4
31.3	873.124	31.3	40682.5	31.3	40006.1	31.3	-60118.1	31.3	28680.6
31.32	1153.58	31.32	40842	31.32	40966.5	31.32	-59317.2	31.32	28585.1
31.34	2659.24	31.34	40977.7	31.34	40776	31.34	-59643.3	31.34	28489.9
31.36	7234.41	31.36	41086.3	31.36	40676.4	31.36	-59851.6	31.36	28395.1
31.38	11729.7	31.38	41164.7	31.38	40812	31.38	-59794.3	31.38	28300.7
31.4	7943.41	31.4	41210	31.4	41159	31.4	-59492.7	31.4	28206.7
31.42	3858.88	31.42	41219.8	31.42	39965.5	31.42	-60695.9	31.42	28113.1
31.44	4394.79	31.44	41192.2	31.44	40857.5	31.44	-59776.4	31.44	28019.9
31.46	6192.1	31.46	41126.2	31.46	40356.4	31.46	-60211.5	31.46	27927.1
31.48	4061.66	31.48	41021.5	31.48	40576.6	31.48	-59886.6	31.48	27834.8
31.5	1554.23	31.5	40878.6	31.5	41090.2	31.5	-59230.1	31.5	27742.9
31.52	624.971	31.52	40699.1	31.52	42082.4	31.52	-58058.3	31.52	27651.6
31.54	375.562	31.54	40485	31.54	41393.9	31.54	-58532.8	31.54	27560.7
31.56	276.742	31.56	40239.4	31.56	41679.9	31.56	-58001.1	31.56	27470.3
31.58	219.121	31.58	39965.9	31.58	40814.8	31.58	-58592.7	31.58	27380.5
31.6	175.521	31.6	39668.3	31.6	40103.2	31.6	-59006.8	31.6	27291.2
31.62	139.61	31.62	39350.9	31.62	41599.3	31.62	-57193.3	31.62	27202.5
31.64	121.843	31.64	39018.1	31.64	38266.4	31.64	-60193.4	31.64	27114.3
31.66	113.596	31.66	38674.1	31.66	39894.8	31.66	-58221	31.66	27026.7
31.68	108.592	31.68	38323	31.68	38605.9	31.68	-59158.8	31.68	26939.7
31.7	108.938	31.7	37968.7	31.7	38025.2	31.7	-59385.1	31.7	26853.4
31.72	128.268	31.72	37614.5	31.72	38138.6	31.72	-58917.5	31.72	26767.6
31.74	218.184	31.74	37263.4	31.74	36558.9	31.74	-60146.2	31.74	26682.5
31.76	556.15	31.76	36918.1	31.76	36733.7	31.76	-59626.1	31.76	26598.1
31.78	1138.91	31.78	36580.7	31.78	37533.9	31.78	-58488.4	31.78	26514.3
31.8	1088.18	31.8	36252.8	31.8	35163.1	31.8	-60531.3	31.8	26431.1
31.82	554.838	31.82	35935.6	31.82	35106.1	31.82	-60271.2	31.82	26348.7
31.84	422.981	31.84	35630	31.84	35125.8	31.84	-59945.9	31.84	26267
31.86	637.174	31.86	35336.3	31.86	34506.9	31.86	-60271	31.86	26186
31.88	617.257	31.88	35054.7	31.88	34485.6	31.88	-60010.8	31.88	26105.7
31.9	334.127	31.9	34784.7	31.9	34074.3	31.9	-60152.1	31.9	26026.1
31.92	197.513	31.92	34526	31.92	34357.2	31.92	-59610.4	31.92	25947.3
31.94	192.665	31.94	34277.6	31.94	32593	31.94	-61126.3	31.94	25869.2
31.96	263.14	31.96	34038.6	31.96	32940.2	31.96	-60540.1	31.96	25791.9
31.98	546.727	31.98	33808	31.98	33660.8	31.98	-59588.8	31.98	25715.4
32	1662.63	32	33584.3	32	32897.7	32	-60128.2	32	25639.6
32.02	3925.82	32.02	33366.4	32.02	33685.5	32.02	-59122.5	32.02	25564.7
32.04	4346.76	32.04	33152.9	32.04	32735.5	32.04	-59859.1	32.04	25490.5
32.06	2224.31	32.06	32942.6	32.06	33164.3	32.06	-59220	32.06	25417.1
32.08	1354.62	32.08	32734.5	32.08	32141.2	32.08	-60034.9	32.08	25344.6
32.1	2074.82	32.1	32527.5	32.1	31444.7	32.1	-60524.5	32.1	25272.9
32.12	2329.08	32.12	32321	32.12	31061.5	32.12	-60701.2	32.12	25202
32.14	1188.42	32.14	32114.4	32.14	33065.8	32.14	-58490.2	32.14	25132
32.16	417.355	32.16	31907.3	32.16	31907.1	32.16	-59441.9	32.16	25062.8
32.18	184.133	32.18	31699.8	32.18	32052.9	32.18	-59088.6	32.18	24994.4
32.2	117.173	32.2	31492.1	32.2	32096.3	32.2	-58837.5	32.2	24926.9
32.22	84.8699	32.22	31284.5	32.22	31737.5	32.22	-58988.6	32.22	24860.3
32.24	64.8557	32.24	31077.5	32.24	30569.9	32.24	-59949.2	32.24	24794.5
32.26	51.0028	32.26	30871.8	32.26	30412.7	32.26	-59900.8	32.26	24729.6
32.28	40.8089	32.28	30668.2	32.28	30353.8	32.28	-59756.1	32.28	24665.6
32.3	33.7022	32.3	30467.5	32.3	30480.8	32.3	-59428.4	32.3	24602.5
32.32	28.4433	32.32	30270.5	32.32	30390.4	32.32	-59321.7	32.32	24540.2
32.34	24.176	32.34	30078	32.34	30810.5	32.34	-58709.1	32.34	24478.9
32.36	20.5851	32.36	29890.7	32.36	29834.5	32.36	-59497.9	32.36	24418.4
32.38	17.892	32.38	29709.3	32.38	30214.4	32.38	-58936.5	32.38	24358.8
32.4	15.7739	32.4	29534.4	32.4	30095.6	32.4	-58880.4	32.4	24300.2
32.42	14.0147	32.42	29366.5	32.42	29125.6	32.42	-59682.5	32.42	24242.4
32.44	12.537	32.44	29206.1	32.44	29262	32.44	-59385.8	32.44	24185.5
32.46	11.2832	32.46	29053.6	32.46	29874.1	32.46	-58621.2	32.46	24129.5
32.48	10.2102	32.48	28909.2	32.48	29552.4	32.48	-58798.5	32.48	24074.5
32.5	8.31927	32.5	28773.1	32.5	29459.7	32.5	-58755.2	32.5	24020.3
32.52	4.88795	32.52	28645.5	32.52	29245.4	32.52	-58841.8	32.52	23967
32.54	3.35467	32.54	28526.3	32.54	29289.5	32.54	-58678.5	32.54	23914.6
32.56	3.08478	32.56	28415.7	32.56	29264.2	32.56	-58593.1	32.56	23863.2
32.58	2.4829	32.58	28313.4	32.58	28997.4	32.58	-58757.7	32.58	23812.6
32.6	0.97922	32.6	28219.6	32.6	28717.5	32.6	-58943.8	32.6	23763
32.62	0.24931	32.62	28134	32.62	28417.6	32.62	-59158.1	32.62	23714.2
32.64	0.27729	32.64	28056.5	32.64	29526.4	32.64	-57971.8	32.64	23666.3
32.66	0.31028	32.66	27986.9	32.66	28581.1	32.66	-58847.5	32.66	23619.3
32.68	0.34959	32.68	27925	32.68	28966.2	32.68	-58400.5	32.68	23573.3
32.7	0.39694	32.7	27870.5	32.7	27692.6	32.7	-59619.6	32.7	23528.1
32.72	0.45469	32.72	27823.1	32.72	28271.8	32.72	-58993	32.72	23483.8
32.74	0.52616	32.74	27782.5	32.74	29645.4	32.74	-57578.7	32.74	23440.3
32.76	0.61612	32.76	27748.1	32.76	28853.5	32.76	-58336.3	32.76	23397.8
32.78	0.73158	32.78	27719.6	32.78	27384.8	32.78	-59776.5	32.78	23356.1
32.8	0.88329	32.8	27696.3	32.8	26934.1	32.8	-60203.9	32.8	23315.3
32.82	1.08832	32.82	27677.8	32.82	27874.8	32.82	-59244.7	32.82	23275.3
32.84	1.3752	32.84	27663.3	32.84	28508.2	32.84	-58596.8	32.84	23236.2
32.86	1.79444	32.86	27652.1	32.86	28271.9	32.86	-58821.8	32.86	23198
32.88	2.44257	32.88	27643.4	32.88	27920.9	32.88	-59164.2	32.88	23160.6
32.9	3.53774	32.9	27636.3	32.9	28256.5	32.9	-58821.4	32.9	23124
32.92	5.98092	32.92	27630	32.92	27811.6	32.92	-59260.1	32.92	23088.3
32.94	15.1681	32.94	27623.6	32.94	28180.5	32.94	-58884.8	32.94	23053.4
32.96	46.3738	32.96	27616.3	32.96	28287.4	32.96	-58770.5	32.96	23019.3
32.98	93.1671	32.98	27607	32.98	28186.9	32.98	-58861.7	32.98	22986
33	81.1767	33	27595.2	33	27852.5	33	-59184.3	33	22953.6
33.02	37.7919	33.02	27580	33.02	27224.7	33.02	-59797	33.02	22921.9
33.04	28.1469	33.04	27560.8	33.04	27426.5	33.04	-59576	33.04	22891
33.06	46.2179	33.06	27537.4	33.06	26911.2	33.06	-60067.8	33.06	22860.8
33.08	46.7318	33.08	27509.3	33.08	27001.8	33.08	-59949.1	33.08	22831.5
33.1	22.2209	33.1	27476.4	33.1	26973.6	33.1	-59944.4	33.1	22802.9
33.12	7.76471	33.12	27438.9	33.12	26566.3	33.12	-60314.2	33.12	22775
33.14	3.57384	33.14	27396.9	33.14	27446.5	33.14	-59392.1	33.14	22747.9
33.16	2.31266	33.16	27351	33.16	26321.6	33.16	-60471.1	33.16	22721.5
33.18	1.73001	33.18	27301.5	33.18	27655.4	33.18	-59087.8	33.18	22695.9
33.2	2.30052	33.2	27249.3	33.2	27360.7	33.2	-59330.2	33.2	22670.9
33.22	3.13585	33.22	27195	33.22	27151.5	33.22	-59485.2	33.22	22646.6
33.24	3.23081	33.24	27139.5	33.24	26128.8	33.24	-60452.3	33.24	22623.1
33.26	3.32078	33.26	27083.5	33.26	26190.2	33.26	-60335	33.26	22600.1
33.28	3.80783	33.28	27028	33.28	26793.1	33.28	-59676.6	33.28	22577.9
33.3	4.63687	33.3	26973.8	33.3	26474.1	33.3	-59941.4	33.3	22556.3
33.32	5.16545	33.32	26921.7	33.32	27430.2	33.32	-58933.1	33.32	22535.3
33.34	5.64346	33.34	26872.4	33.34	27568.3	33.34	-58745.8	33.34	22515
33.36	6.22649	33.36	26826.7	33.36	27024.4	33.36	-59244	33.36	22495.3
33.38	6.93683	33.38	26785.2	33.38	26819.8	33.38	-59407.1	33.38	22476.2
33.4	7.80579	33.4	26748.5	33.4	26560.9	33.4	-59629.2	33.4	22457.6
33.42	8.87727	33.42	26717.1	33.42	26396.5	33.42	-59762.2	33.42	22439.7
33.44	10.2135	33.44	26691.5	33.44	26458.9	33.44	-59674.3	33.44	22422.3
33.46	11.8799	33.46	26672.2	33.46	26306.3	33.46	-59807.5	33.46	22405.5
33.48	14.0023	33.48	26659.4	33.48	26468.5	33.48	-59632.6	33.48	22389.1
33.5	16.8581	33.5	26653.6	33.5	26954.5	33.5	-59140.7	33.5	22373.4
33.52	20.7535	33.52	26655	33.52	26044.2	33.52	-60052.4	33.52	22358.1
33.54	26.2028	33.54	26663.9	33.54	26284.8	33.54	-59820.8	33.54	22343.3
33.56	34.1557	33.56	26680.6	33.56	26340.1	33.56	-59782.2	33.56	22329
33.58	46.4918	33.58	26705.2	33.58	27278.5	33.58	-58868.4	33.58	22315.2
33.6	67.4316	33.6	26738	33.6	27004.2	33.6	-59175.5	33.6	22301.9
33.62	114.808	33.62	26779.2	33.62	26877.8	33.62	-59343	33.62	22288.9
33.64	293.654	33.64	26828.9	33.64	27255	33.64	-59015.5	33.64	22276.4
33.66	888.722	33.66	26887.3	33.66	26992.7	33.66	-59336.3	33.66	22264.4
33.68	1756.82	33.68	26954.5	33.68	26521.4	33.68	-59874.7	33.68	22252.7
33.7	1514.4	33.7	27030.6	33.7	27008.9	33.7	-59463.4	33.7	22241.4
33.72	702.142	33.72	27115.8	33.72	27017.8	33.72	-59539.7	33.72	22230.5
33.74	512.996	33.74	27210.1	33.74	26979.5	33.74	-59672.3	33.74	22219.9
33.76	850.767	33.76	27313.6	33.76	26969.1	33.76	-59786.2	33.76	22209.7
33.78	921.649	33.78	27426.3	33.78	27764.2	33.78	-59103.7	33.78	22199.9
33.8	472.927	33.8	27548.2	33.8	27354.1	33.8	-59635.8	33.8	22190.3
33.82	183.557	33.82	27679.3	33.82	27988.6	33.82	-59132.3	33.82	22181
33.84	100.094	33.84	27819.3	33.84	28397.3	33.84	-58863.7	33.84	22172.1
33.86	77.7403	33.86	27968.3	33.86	28173.3	33.86	-59236.7	33.86	22163.4
33.88	68.9661	33.88	28125.8	33.88	28076.7	33.88	-59490.8	33.88	22155
33.9	65.6255	33.9	28291.6	33.9	27499.9	33.9	-60233.4	33.9	22146.8
33.92	65.6756	33.92	28465.3	33.92	27904.5	33.92	-60002.4	33.92	22138.9
33.94	68.3348	33.94	28646.1	33.94	28102.5	33.94	-59985.3	33.94	22131.1
33.96	73.3786	33.96	28833.5	33.96	27480.9	33.96	-60794.2	33.96	22123.6
33.98	80.9449	33.98	29026.5	33.98	28174	33.98	-60294.2	33.98	22116.3
34	91.497	34	29224.1	34	27721.5	34	-60944.3	34	22109.2
34.02	105.889	34.02	29425.1	34.02	27841.7	34.02	-61025.1	34.02	22102.3
34.04	125.548	34.04	29628.1	34.04	28640.9	34.04	-60428.8	34.04	22095.5
34.06	152.839	34.06	29831.4	34.06	27213.5	34.06	-62059.5	34.06	22088.8
34.08	191.815	34.08	30033.1	34.08	27625.9	34.08	-61848.9	34.08	22082.3
34.1	249.791	34.1	30231.4	34.1	28431.5	34.1	-61241.6	34.1	22075.9
34.12	341.089	34.12	30424.1	34.12	29045.4	34.12	-60820.3	34.12	22069.6
34.14	501.252	34.14	30608.8	34.14	28957.8	34.14	-61092.7	34.14	22063.4
34.16	904.179	34.16	30783.1	34.16	29238.2	34.16	-60986.6	34.16	22057.3
34.18	2489.56	34.18	30944.7	34.18	29183.8	34.18	-61202.6	34.18	22051.3
34.2	7170.42	34.2	31091.2	34.2	30617.5	34.2	-59915.4	34.2	22045.3
34.22	12357.5	34.22	31220.4	34.22	30676.2	34.22	-59985.8	34.22	22039.4
34.24	9077.6	34.24	31330.1	34.24	30987.6	34.24	-59784.1	34.24	22033.6
34.26	4065.21	34.26	31418.6	34.26	31533.7	34.26	-59326.5	34.26	22027.7
34.28	3487.11	34.28	31484.4	34.28	32184.4	34.28	-58741.7	34.28	22021.9
34.3	5904.36	34.3	31526.5	34.3	31876	34.3	-59092.2	34.3	22016.1
34.32	5817.82	34.32	31544.4	34.32	31920.4	34.32	-59065.7	34.32	22010.3
34.34	2751.89	34.34	31537.8	34.34	33263.7	34.34	-57715.7	34.34	22004.5
34.36	971.713	34.36	31507.1	34.36	33356.4	34.36	-57592.4	34.36	21998.7
34.38	451.702	34.38	31453.2	34.38	32908.5	34.38	-57986.4	34.38	21992.8
34.4	295.369	34.4	31377.3	34.4	33002.7	34.4	-57816.2	34.4	21986.9
34.42	219.794	34.42	31280.9	34.42	33735	34.42	-56987.6	34.42	21981
34.44	172.583	34.44	31166	34.44	33308.9	34.44	-57298.7	34.44	21975
34.46	140.066	34.46	31034.5	34.46	32481.5	34.46	-57994.7	34.46	21968.9
34.48	117.455	34.48	30888.9	34.48	32677.2	34.48	-57653.3	34.48	21962.8
34.5	102.477	34.5	30731.3	34.5	32690.7	34.5	-57482.3	34.5	21956.7
34.52	91.9778	34.52	30564.1	34.52	32870	34.52	-57135.8	34.52	21950.4
34.54	83.7289	34.54	30389.5	34.54	31662.9	34.54	-58168.3	34.54	21944
34.56	77.9734	34.56	30209.5	34.56	30841.8	34.56	-58809.4	34.56	21937.6
34.58	74.3461	34.58	30026.1	34.58	30982.4	34.58	-58485.4	34.58	21931.1
34.6	72.6299	34.6	29841	34.6	30829.6	34.6	-58453.1	34.6	21924.4
34.62	72.7875	34.62	29655.7	34.62	31754.8	34.62	-57342.6	34.62	21917.7
34.64	74.9654	34.64	29471.4	34.64	30647.4	34.64	-58265.7	34.64	21910.8
34.66	79.542	34.66	29289.2	34.66	29638.5	34.66	-59092.4	34.66	21903.8
34.68	87.2442	34.68	29109.9	34.68	29712.8	34.68	-58838.8	34.68	21896.8
34.7	96.7451	34.7	28934.1	34.7	29118.8	34.7	-59257	34.7	21889.5
34.72	108.778	34.72	28762.3	34.72	28767.4	34.72	-59436.5	34.72	21882.2
34.74	137.795	34.74	28594.6	34.74	28841.9	34.74	-59194.4	34.74	21874.7
34.76	203.825	34.76	28431.2	34.76	27644.1	34.76	-60228.7	34.76	21867.1
34.78	418.776	34.78	28271.9	34.78	28549.1	34.78	-59164.5	34.78	21859.4
34.8	1078.85	34.8	28116.8	34.8	27852.5	34.8	-59706	34.8	21851.5
34.82	2040.56	34.82	27965.6	34.82	27643.7	34.82	-59763.6	34.82	21843.5
34.84	1961.88	34.84	27818.1	34.84	28283.8	34.84	-58976	34.84	21835.3
34.86	1775.66	34.86	27674	34.86	26930.6	34.86	-60185	34.86	21827
34.88	3394.06	34.88	27533	34.88	26198.4	34.88	-60776.2	34.88	21818.6
34.9	5529.45	34.9	27394.8	34.9	27162.8	34.9	-59673.7	34.9	21810.1
34.92	4275.3	34.92	27259.4	34.92	26045.7	34.92	-60655.4	34.92	21801.4
34.94	2012.3	34.94	27126.5	34.94	26522.3	34.94	-60046	34.94	21792.5
34.96	1494.06	34.96	26996.1	34.96	26238.7	34.96	-60199.1	34.96	21783.6
34.98	2301.36	34.98	26868	34.98	25939.2	34.98	-60370.5	34.98	21774.4
35	2279.51	35	26742.3	35	26837.4	35	-59346.6	35	21765.2
35.02	1113.78	35.02	26619.1	35.02	26137	35.02	-59923.7	35.02	21755.9
35.04	413.083	35.04	26498.4	35.04	26817.5	35.04	-59122.6	35.04	21746.4
35.06	201.414	35.06	26380.5	35.06	25809.6	35.06	-60012.6	35.06	21736.8
35.08	136.638	35.08	26265.3	35.08	25671.8	35.08	-60035.2	35.08	21727
35.1	105.183	35.1	26153.2	35.1	25842.5	35.1	-59752.4	35.1	21717.2
35.12	85.4303	35.12	26044.3	35.12	26776.9	35.12	-58709.1	35.12	21707.2
35.14	71.983	35.14	25938.8	35.14	26492.9	35.14	-58887.5	35.14	21697.2
35.16	62.8563	35.16	25836.7	35.16	25394.3	35.16	-59884	35.16	21687
35.18	56.6688	35.18	25738.2	35.18	26339.7	35.18	-58840.1	35.18	21676.7
35.2	52.6427	35.2	25643.4	35.2	26245	35.2	-58840.1	35.2	21666.4
35.22	50.3441	35.22	25552.4	35.22	25216.7	35.22	-59777.3	35.22	21656
35.24	49.5604	35.24	25465	35.24	24674.5	35.24	-60232.1	35.24	21645.5
35.26	50.2477	35.26	25381.3	35.26	25110.2	35.26	-59712.8	35.26	21634.9
35.28	52.5214	35.28	25301.2	35.28	25315.8	35.28	-59427.1	35.28	21624.2
35.3	56.5405	35.3	25224.5	35.3	25302.4	35.3	-59363.8	35.3	21613.5
35.32	62.1561	35.32	25151.1	35.32	25242	35.32	-59350.8	35.32	21602.8
35.34	71.5041	35.34	25080.8	35.34	25259.5	35.34	-59263	35.34	21591.9
35.36	87.0469	35.36	25013.3	35.36	24135	35.36	-60319.9	35.36	21581.1
35.38	110.52	35.38	24948.2	35.38	24541.8	35.38	-59848.1	35.38	21570.2
35.4	147.798	35.4	24885.4	35.4	24211.9	35.4	-60115.2	35.4	21559.4
35.42	225.981	35.42	24824.5	35.42	24774.2	35.42	-59492	35.42	21548.5
35.44	485.226	35.44	24765.2	35.44	25138.2	35.44	-59068.6	35.44	21537.6
35.46	1459.35	35.46	24707	35.46	25138.7	35.46	-59009.9	35.46	21526.7
35.48	3510.91	35.48	24649.7	35.48	24031.4	35.48	-60060	35.48	21515.8
35.5	4269.49	35.5	24593	35.5	24037.4	35.5	-59997.3	35.5	21504.9
35.52	2347.61	35.52	24536.6	35.52	24878	35.52	-59100.2	35.52	21494.1
35.54	1110.19	35.54	24480.1	35.54	24790.6	35.54	-59131.2	35.54	21483.3
35.56	1388.56	35.56	24423.5	35.56	23966.1	35.56	-59899	35.56	21472.6
35.58	2252.05	35.58	24366.4	35.58	24615.6	35.58	-59192.5	35.58	21461.9
35.6	1815.71	35.6	24308.9	35.6	24390.5	35.6	-59360.1	35.6	21451.3
35.62	773.087	35.62	24250.7	35.62	24700.1	35.62	-58992.3	35.62	21440.8
35.64	279.141	35.64	24191.9	35.64	24682.4	35.64	-58951.2	35.64	21430.3
35.66	142.256	35.66	24132.6	35.66	24597.7	35.66	-58976.6	35.66	21420
35.68	95.9442	35.68	24072.7	35.68	23887.5	35.68	-59626.9	35.68	21409.8
35.7	70.8695	35.7	24012.4	35.7	24202.9	35.7	-59251.2	35.7	21399.7
35.72	54.7862	35.72	23951.8	35.72	24751.4	35.72	-58642.1	35.72	21389.7
35.74	43.7572	35.74	23891.1	35.74	23847.7	35.74	-59485	35.74	21379.8
35.76	35.8328	35.76	23830.5	35.76	24423.3	35.76	-58848.9	35.76	21370.2
35.78	29.9294	35.78	23770.2	35.78	23663.1	35.78	-59548.7	35.78	21360.6
35.8	25.403	35.8	23710.3	35.8	24318.2	35.8	-58833.8	35.8	21351.3
35.82	21.8497	35.82	23651	35.82	24086.7	35.82	-59006	35.82	21342.1
35.84	19.0055	35.84	23592.7	35.84	24056.4	35.84	-58978	35.84	21333.1
35.86	16.6908	35.86	23535.3	35.86	22946.7	35.86	-60030.2	35.86	21324.3
35.88	14.7804	35.88	23479.1	35.88	23895.7	35.88	-59025.1	35.88	21315.7
35.9	13.1842	35.9	23424.3	35.9	24346.2	35.9	-58519.8	35.9	21307.3
35.92	11.8362	35.92	23370.9	35.92	23113.1	35.92	-59699.4	35.92	21299.1
35.94	10.6869	35.94	23319.1	35.94	24177.9	35.94	-58582.9	35.94	21291.2
35.96	9.69887	35.96	23268.9	35.96	22609.6	35.96	-60101	35.96	21283.5
35.98	7.59891	35.98	23220.5	35.98	23227.4	35.98	-59434.7	35.98	21276.1
36	4.39449	36	23173.8	36	23142	36	-59473.5	36	21268.9
36.02	3.14375	36.02	23129	36.02	23635.6	36.02	-58935	36.02	21261.9
36.04	2.87407	36.04	23085.9	36.04	23024.8	36.04	-59502.8	36.04	21255.3
36.06	2.54834	36.06	23044.8	36.06	22649.3	36.06	-59837.2	36.06	21248.9
36.08	1.27103	36.08	23005.6	36.08	22665.1	36.08	-59782.2	36.08	21242.8
36.1	0.09037	36.1	22968.2	36.1	22889.7	36.1	-59520.2	36.1	21237
36.12	0	36.12	22932.8	36.12	23911.2	36.12	-58463.3	36.12	21231.5
36.14	0.97597	36.14	22899.2	36.14	22692.3	36.14	-59648.6	36.14	21226.3
36.16	7.04316	36.16	22867.6	36.16	23001.7	36.16	-59307.6	36.16	21221.4
36.18	12.4032	36.18	22837.8	36.18	21924.4	36.18	-60355	36.18	21216.8
36.2	13.6456	36.2	22810	36.2	22738.5	36.2	-59513.1	36.2	21212.5
36.22	14.9196	36.22	22784	36.22	22280.3	36.22	-59945.4	36.22	21208.5
36.24	17.6122	36.24	22759.9	36.24	22350.4	36.24	-59851.1	36.24	21204.9
36.26	22.6137	36.26	22737.6	36.26	22172.8	36.26	-60006.5	36.26	21201.6
36.28	26.4475	36.28	22717.2	36.28	22544	36.28	-59614.8	36.28	21198.6
36.3	29.3242	36.3	22698.6	36.3	22430.8	36.3	-59709.4	36.3	21195.9
36.32	32.7012	36.32	22681.8	36.32	22243.7	36.32	-59879.7	36.32	21193.6
36.34	36.7024	36.34	22666.8	36.34	22659	36.34	-59449.5	36.34	21191.6
36.36	43.4615	36.36	22653.6	36.36	22509	36.36	-59586.3	36.36	21189.9
36.38	54.1363	36.38	22642.1	36.38	22451.8	36.38	-59632	36.38	21188.6
36.4	63.8653	36.4	22632.4	36.4	23289.8	36.4	-58784.3	36.4	21187.5
36.42	73.6094	36.42	22624.5	36.42	22371.7	36.42	-59694.4	36.42	21186.8
36.44	85.8916	36.44	22618.3	36.44	22278.1	36.44	-59781.9	36.44	21186.5
36.46	103.273	36.46	22613.9	36.46	23381.1	36.46	-58674.4	36.46	21186.4
36.48	126.454	36.48	22611.1	36.48	22340.8	36.48	-59712.1	36.48	21186.7
36.5	155.602	36.5	22610.2	36.5	23396.6	36.5	-58655.3	36.5	21187.2
36.52	196.091	36.52	22610.9	36.52	22824.6	36.52	-59228	36.52	21188.1
36.54	256.103	36.54	22613.4	36.54	22244.3	36.54	-59810.7	36.54	21189.3
36.56	351.444	36.56	22617.6	36.56	23115.2	36.56	-58944.1	36.56	21190.7
36.58	530.991	36.58	22623.6	36.58	22452.6	36.58	-59612.6	36.58	21192.5
36.6	1073	36.6	22631.3	36.6	23214.7	36.6	-58858.2	36.6	21194.5
36.62	3109.64	36.62	22640.7	36.62	21791.6	36.62	-60290.8	36.62	21196.8
36.64	7719.32	36.64	22651.8	36.64	22625.3	36.64	-59468.2	36.64	21199.4
36.66	10304.5	36.66	22664.7	36.66	22661.5	36.66	-59444.8	36.66	21202.2
36.68	6174.46	36.68	22679.3	36.68	22165.6	36.68	-59955.4	36.68	21205.2
36.7	2781.82	36.7	22695.7	36.7	24017.5	36.7	-58119.8	36.7	21208.5
36.72	2853.44	36.72	22713.7	36.72	21526.1	36.72	-60629.3	36.72	21212
36.74	4975.62	36.74	22733.3	36.74	22275.3	36.74	-59899.7	36.74	21215.7
36.76	5094.79	36.76	22754.6	36.76	22879.4	36.76	-59316.9	36.76	21219.5
36.78	2693.64	36.78	22777.5	36.78	22430.8	36.78	-59788.3	36.78	21223.6
36.8	1312.92	36.8	22801.9	36.8	23263.1	36.8	-58980.5	36.8	21227.7
36.82	1428.16	36.82	22827.8	36.82	22926.5	36.82	-59342.9	36.82	21232.1
36.84	3329.85	36.84	22855.2	36.84	23566.9	36.84	-58729.9	36.84	21236.5
36.86	6837.54	36.86	22883.9	36.86	22447.7	36.86	-59877.9	36.86	21241.1
36.88	7079.85	36.88	22913.8	36.88	22960.9	36.88	-59394.6	36.88	21245.7
36.9	3628.25	36.9	22945	36.9	23317.6	36.9	-59069	36.9	21250.4
36.92	1833.04	36.92	22977.2	36.92	23293.3	36.92	-59125.5	36.92	21255.2
36.94	2438.38	36.94	23010.3	36.94	23210.1	36.94	-59241.9	36.94	21260
36.96	3926.48	36.96	23044.2	36.96	22883.2	36.96	-59602.6	36.96	21264.8
36.98	3233.85	36.98	23078.6	36.98	23959.8	36.98	-58560.5	36.98	21269.5
37	1451.15	37	23113.5	37	22926.9	37	-59628.2	37	21274.2
37.02	574.59	37.02	23148.5	37.02	23198.6	37.02	-59391.5	37.02	21278.9
37.04	328.193	37.04	23183.4	37.04	23336.4	37.04	-59288.6	37.04	21283.5
37.06	251.571	37.06	23217.9	37.06	23032.6	37.06	-59627	37.06	21287.9
37.08	218.061	37.08	23251.8	37.08	22172.7	37.08	-60520.7	37.08	21292.3
37.1	207.255	37.1	23284.6	37.1	22975.6	37.1	-59750.7	37.1	21296.4
37.12	216.805	37.12	23316.2	37.12	23158.5	37.12	-59599.3	37.12	21300.4
37.14	253.726	37.14	23346	37.14	23213.9	37.14	-59573.8	37.14	21304.2
37.16	366.946	37.16	23373.9	37.16	23176.7	37.16	-59638.9	37.16	21307.7
37.18	847.724	37.18	23399.4	37.18	23385	37.18	-59456.1	37.18	21310.9
37.2	2323.36	37.2	23422.2	37.2	23770.2	37.2	-59093.7	37.2	21313.9
37.22	4223.79	37.22	23442.1	37.22	22940.5	37.22	-59943.2	37.22	21316.5
37.24	3503.99	37.24	23458.7	37.24	23543.4	37.24	-59357	37.24	21318.8
37.26	1610.6	37.26	23471.7	37.26	22843.9	37.26	-60069.5	37.26	21320.6
37.28	973.269	37.28	23481.1	37.28	23937.4	37.28	-58985.4	37.28	21322.1
37.3	1561.96	37.3	23486.6	37.3	23495.3	37.3	-59433	37.3	21323.1
37.32	2278.62	37.32	23488.2	37.32	23697.2	37.32	-59232.7	37.32	21323.7
37.34	1586.59	37.34	23485.8	37.34	23655.2	37.34	-59272.2	37.34	21323.8
37.36	650.519	37.36	23479.4	37.36	23465.5	37.36	-59455.5	37.36	21323.3
37.38	254.778	37.38	23469.1	37.38	24062.3	37.38	-58848.5	37.38	21322.3
37.4	145.326	37.4	23455	37.4	24072.5	37.4	-58824.2	37.4	21320.6
37.42	106.39	37.42	23437.4	37.42	23010.2	37.42	-59868.8	37.42	21318.4
37.44	85.1128	37.44	23416.3	37.44	23537.9	37.44	-59320.1	37.44	21315.5
37.46	70.9	37.46	23392	37.46	23439.4	37.46	-59394.3	37.46	21311.9
37.48	60.9234	37.48	23364.9	37.48	23364.2	37.48	-59442.3	37.48	21307.6
37.5	56.1385	37.5	23335.1	37.5	23670.7	37.5	-59106.1	37.5	21302.6
37.52	54.8583	37.52	23303	37.52	24259	37.52	-58485.7	37.52	21296.8
37.54	56.2475	37.54	23268.8	37.54	23703	37.54	-59007.5	37.54	21290.2
37.56	60.6384	37.56	23232.9	37.56	23593.2	37.56	-59081.4	37.56	21282.8
37.58	68.9836	37.58	23195.6	37.58	22811.3	37.58	-59826	37.58	21274.6
37.6	83.2979	37.6	23156.9	37.6	22626.2	37.6	-59972.4	37.6	21265.4
37.62	107.912	37.62	23117.3	37.62	22655.3	37.62	-59903.7	37.62	21255.4
37.64	156.402	37.64	23077	37.64	22664.8	37.64	-59853.9	37.64	21244.5
37.66	305.36	37.66	23036.1	37.66	23208.4	37.66	-59269.4	37.66	21232.6
37.68	867.623	37.68	22994.7	37.68	23267.8	37.68	-59168.6	37.68	21219.7
37.7	2166.76	37.7	22953.2	37.7	22160.4	37.7	-60234.5	37.7	21205.8
37.72	2994.37	37.72	22911.5	37.72	23312.1	37.72	-59041.1	37.72	21190.9
37.74	1860.02	37.74	22869.9	37.74	23155.4	37.74	-59156.1	37.74	21175
37.76	805.565	37.76	22828.4	37.76	23924	37.76	-58346	37.76	21158.1
37.78	711.314	37.78	22787	37.78	22496.1	37.78	-59732.6	37.78	21140
37.8	1279.63	37.8	22746	37.8	22894.1	37.8	-59293.5	37.8	21120.9
37.82	1514.35	37.82	22705.2	37.82	22688.1	37.82	-59458.8	37.82	21100.7
37.84	848.7	37.84	22664.8	37.84	22602.5	37.84	-59503.9	37.84	21079.3
37.86	316.223	37.86	22624.8	37.86	22927.7	37.86	-59138.7	37.86	21056.8
37.88	131.245	37.88	22585.1	37.88	22129.4	37.88	-59897.4	37.88	21033.2
37.9	79.2773	37.9	22546	37.9	23176	37.9	-58811.6	37.9	21008.5
37.92	56.7657	37.92	22507.2	37.92	23214.8	37.92	-58734.1	37.92	20982.6
37.94	43.2877	37.94	22469	37.94	22474.9	37.94	-59435.8	37.94	20955.5
37.96	34.3241	37.96	22431.1	37.96	22402.3	37.96	-59470.5	37.96	20927.3
37.98	28.0132	37.98	22393.8	37.98	21197.4	37.98	-60638.1	37.98	20897.9
38	23.4166	38	22357	38	22054	38	-59744.7	38	20867.4
38.02	20.0499	38.02	22320.6	38.02	21689.3	38.02	-60073	38.02	20835.8
38.04	18.1454	38.04	22284.8	38.04	21560.3	38.04	-60166.1	38.04	20803
38.06	16.8594	38.06	22249.4	38.06	22195.3	38.06	-59495.8	38.06	20769
38.08	15.4596	38.08	22214.6	38.08	22384.2	38.08	-59272	38.08	20734
38.1	14.3826	38.1	22180.2	38.1	22167	38.1	-59454.9	38.1	20697.8
38.12	13.6784	38.12	22146.5	38.12	21998.8	38.12	-59589.3	38.12	20660.6
38.14	13.5974	38.14	22113.2	38.14	22052.7	38.14	-59502.2	38.14	20622.3
38.16	13.8048	38.16	22080.5	38.16	21699	38.16	-59823.1	38.16	20583
38.18	14.062	38.18	22048.4	38.18	22159.1	38.18	-59330.9	38.18	20542.6
38.2	14.6634	38.2	22016.9	38.2	22016.8	38.2	-59441.7	38.2	20501.3
38.22	14.6001	38.22	21985.9	38.22	21954.6	38.22	-59473	38.22	20459
38.24	15.239	38.24	21955.6	38.24	21828.1	38.24	-59569.1	38.24	20415.8
38.26	19.0675	38.26	21925.9	38.26	21733	38.26	-59634.6	38.26	20371.7
38.28	29.327	38.28	21896.8	38.28	21760.3	38.28	-59578.2	38.28	20326.7
38.3	66.4791	38.3	21868.4	38.3	22410.1	38.3	-58900	38.3	20281
38.32	164.579	38.32	21840.6	38.32	22002.7	38.32	-59279.6	38.32	20234.6
38.34	265.773	38.34	21813.5	38.34	21921.6	38.34	-59333.6	38.34	20187.4
38.36	202.284	38.36	21787.1	38.36	21491.7	38.36	-59737.1	38.36	20139.7
38.38	99.4122	38.38	21761.4	38.38	21859.6	38.38	-59343.5	38.38	20091.3
38.4	73.7807	38.4	21736.4	38.4	21581.1	38.4	-59597	38.4	20042.5
38.42	116.763	38.42	21712.1	38.42	21497.4	38.42	-59656.3	38.42	19993.2
38.44	168.916	38.44	21688.5	38.44	21593.3	38.44	-59536.8	38.44	19943.5
38.46	145.15	38.46	21665.6	38.46	21345.4	38.46	-59761.8	38.46	19893.5
38.48	125.275	38.48	21643.4	38.48	22060	38.48	-59025	38.48	19843.4
38.5	230.426	38.5	21622	38.5	21884.2	38.5	-59179.5	38.5	19793
38.52	633.529	38.52	21601.4	38.52	22158.5	38.52	-58884.6	38.52	19742.6
38.54	1255.86	38.54	21581.6	38.54	20802.5	38.54	-60220.8	38.54	19692.3
38.56	1194.94	38.56	21562.6	38.56	21545.3	38.56	-59459	38.56	19642.1
38.58	584.642	38.58	21544.5	38.58	21426.6	38.58	-59559.6	38.58	19592.1
38.6	289.632	38.6	21527.4	38.6	21909	38.6	-59060	38.6	19542.4
38.62	390.284	38.62	21511.2	38.62	21159.8	38.62	-59793	38.62	19493.1
38.64	668.503	38.64	21496	38.64	22474.4	38.64	-58463.4	38.64	19444.4
38.66	610.954	38.66	21482	38.66	20871.5	38.66	-60052.2	38.66	19396.3
38.68	290.2	38.68	21469.2	38.68	21364.2	38.68	-59546.6	38.68	19348.9
38.7	108.699	38.7	21457.6	38.7	22379.7	38.7	-58519.5	38.7	19302.4
38.72	53.6747	38.72	21447.3	38.72	21652	38.72	-59237	38.72	19256.9
38.74	36.8466	38.74	21438.5	38.74	21578.1	38.74	-59302	38.74	19212.5
38.76	28.6733	38.76	21431	38.76	21798.7	38.76	-59074	38.76	19169.3
38.78	23.7694	38.78	21425.1	38.78	21428.8	38.78	-59438	38.78	19127.5
38.8	20.7089	38.8	21420.7	38.8	20697.3	38.8	-60165.1	38.8	19087.1
38.82	18.8457	38.82	21417.8	38.82	21944.9	38.82	-58914.6	38.82	19048.3
38.84	17.8316	38.84	21416.4	38.84	21987.7	38.84	-58870.4	38.84	19011.3
38.86	17.5045	38.86	21416.5	38.86	21381.8	38.86	-59476.3	38.86	18976.2
38.88	17.8906	38.88	21418	38.88	21028.4	38.88	-59831.2	38.88	18943
38.9	19.0244	38.9	21420.8	38.9	21807.5	38.9	-59055	38.9	18912
38.92	21.0273	38.92	21424.8	38.92	21154.1	38.92	-59712.5	38.92	18883.2
38.94	24.1943	38.94	21429.9	38.94	20974.3	38.94	-59897.3	38.94	18856.9
38.96	29.1066	38.96	21435.8	38.96	21264.1	38.96	-59613.5	38.96	18833.1
38.98	36.8978	38.98	21442.5	38.98	21633	38.98	-59251.2	38.98	18811.9
39	49.9173	39	21449.6	39	21484.4	39	-59406.9	39	18793.6
39.02	76.5899	39.02	21456.9	39.02	21271.5	39.02	-59627.1	39.02	18778.2
39.04	164.372	39.04	21464.3	39.04	21832.4	39.04	-59073.6	39.04	18765.9
39.06	474.007	39.06	21471.6	39.06	21633.9	39.06	-59279.3	39.06	18756.8
39.08	1090.24	39.08	21478.5	39.08	21314.1	39.08	-59606	39.08	18751
39.1	1323.39	39.1	21484.8	39.1	21539.6	39.1	-59386.8	39.1	18748.7
39.12	754.4	39.12	21490.4	39.12	22186.3	39.12	-58745.8	39.12	18749.9
39.14	327.745	39.14	21495.3	39.14	21290.7	39.14	-59646.3	39.14	18754.8
39.16	311.591	39.16	21499.4	39.16	21132.5	39.16	-59808.6	39.16	18763.5
39.18	570.862	39.18	21502.7	39.18	21273.2	39.18	-59671.2	39.18	18776
39.2	693.226	39.2	21505.2	39.2	21452.5	39.2	-59494.4	39.2	18792.5
39.22	404.321	39.22	21507.1	39.22	21529	39.22	-59419.8	39.22	18813.1
39.24	156.377	39.24	21508.5	39.24	22164.2	39.24	-58786	39.24	18837.8
39.26	66.8087	39.26	21509.8	39.26	21455.3	39.26	-59496.1	39.26	18866.7
39.28	43.3103	39.28	21511	39.28	21145.7	39.28	-59807	39.28	18899.8
39.3	37.934	39.3	21512.6	39.3	21923.4	39.3	-59030.9	39.3	18937.3
39.32	51.4173	39.32	21514.9	39.32	21115.5	39.32	-59841.1	39.32	18979
39.34	102.036	39.34	21518.2	39.34	21143	39.34	-59816.8	39.34	19025.1
39.36	161.836	39.36	21522.8	39.36	21331.2	39.36	-59633.3	39.36	19075.6
39.38	130.536	39.38	21529.3	39.38	21928.9	39.38	-59042.1	39.38	19130.3
39.4	66.0048	39.4	21537.8	39.4	21859.7	39.4	-59119.7	39.4	19189.4
39.42	41.8789	39.42	21548.7	39.42	21646.7	39.42	-59343.6	39.42	19252.7
39.44	57.9364	39.44	21562.3	39.44	21340.3	39.44	-59663.7	39.44	19320.1
39.46	88.1268	39.46	21578.9	39.46	21434.1	39.46	-59586.5	39.46	19391.7
39.48	76.5719	39.48	21598.8	39.48	21331.5	39.48	-59708.9	39.48	19467.2
39.5	42.5729	39.5	21621.9	39.5	21632.6	39.5	-59431	39.5	19546.5
39.52	24.9715	39.52	21648.6	39.52	21585.7	39.52	-59504.6	39.52	19629.5
39.54	20.2446	39.54	21678.9	39.54	21424	39.54	-59696.6	39.54	19715.9
39.56	19.6406	39.56	21712.7	39.56	21428.7	39.56	-59725.7	39.56	19805.5
39.58	20.1033	39.58	21750.1	39.58	22081	39.58	-59110.8	39.58	19898.1
39.6	20.6305	39.6	21790.9	39.6	22539.4	39.6	-58693.1	39.6	19993.4
39.62	21.4741	39.62	21834.9	39.62	21757.3	39.62	-59519.2	39.62	20091
39.64	23.5104	39.64	21881.9	39.64	22552.4	39.64	-58771.2	39.64	20190.5
39.66	26.5102	39.66	21931.7	39.66	22004	39.66	-59369.3	39.66	20291.6
39.68	30.4189	39.68	21983.7	39.68	21822.7	39.68	-59602.7	39.68	20393.8
39.7	35.3472	39.7	22037.7	39.7	22037.1	39.7	-59442.2	39.7	20496.6
39.72	41.8106	39.72	22093.1	39.72	22056.4	39.72	-59478.3	39.72	20599.5
39.74	51.0318	39.74	22149.3	39.74	21196.6	39.74	-60394.4	39.74	20701.8
39.76	64.2242	39.76	22205.7	39.76	22429	39.76	-59218.4	39.76	20802.9
39.78	83.6237	39.78	22261.7	39.78	21884.6	39.78	-59818.8	39.78	20902.1
39.8	113.96	39.8	22316.4	39.8	21943.5	39.8	-59814.6	39.8	20998.5
39.82	168.663	39.82	22369.1	39.82	22680.6	39.82	-59130.2	39.82	21091.5
39.84	318.247	39.84	22418.8	39.84	22110.8	39.84	-59749.7	39.84	21180.1
39.86	864.92	39.86	22464.5	39.86	22314.5	39.86	-59591.7	39.86	21263.2
39.88	2227.3	39.88	22505.2	39.88	23308.6	39.88	-58638.3	39.88	21340
39.9	3479.27	39.9	22539.7	39.9	22351.3	39.9	-59630.1	39.9	21409.2
39.92	2588.29	39.92	22566.8	39.92	22678.9	39.92	-59329.6	39.92	21469.7
39.94	1458.16	39.94	22585.1	39.94	22746.8	39.94	-59279.9	39.94	21520.1
39.96	1403.57	39.96	22593.2	39.96	22265.7	39.96	-59769.1	39.96	21559.1
39.98	1780.91	39.98	22589.6	39.98	22904.1	39.98	-59127.2	39.98	21585.3
40	2080.8	40	22572.8	40	22628.2	40	-59386.2	40	21597.1
	--

## Sheet: Figure 2b
333.942	-0.58686
333.749	-0.79145
333.557	-0.81855
333.364	-0.87605
333.171	-0.87859
332.978	-0.91323
332.786	-0.90028
332.593	-0.89781
332.4	-0.88272
332.208	-0.90019
332.015	-0.89992
331.822	-0.9115
331.629	-0.9145
331.437	-0.9307
331.244	-0.92073
331.051	-0.90822
330.859	-0.88352
330.666	-0.87155
330.473	-0.85448
330.281	-0.85898
330.088	-0.87198
329.895	-0.89653
329.702	-0.90259
329.51	-0.91076
329.317	-0.9217
329.124	-0.94556
328.932	-0.94804
328.739	-0.93053
328.546	-0.89075
328.353	-0.85663
328.161	-0.82965
327.968	-0.83232
327.775	-0.85528
327.583	-0.89117
327.39	-0.9106
327.197	-0.92436
327.004	-0.93546
326.812	-0.95774
326.619	-0.98077
326.426	-1.01368
326.234	-1.04429
326.041	-1.07138
325.848	-1.07948
325.655	-1.07473
325.463	-1.05037
325.27	-1.01874
325.077	-0.97717
324.885	-0.93443
324.692	-0.88817
324.499	-0.85431
324.306	-0.82285
324.114	-0.7864
323.921	-0.73571
323.728	-0.68642
323.536	-0.63094
323.343	-0.57322
323.15	-0.52798
322.958	-0.52796
322.765	-0.56458
322.572	-0.62111
322.379	-0.67578
322.187	-0.7225
321.994	-0.74082
321.801	-0.7328
321.609	-0.70607
321.416	-0.68346
321.223	-0.67458
321.03	-0.69236
320.838	-0.72103
320.645	-0.7454
320.452	-0.75464
320.26	-0.76499
320.067	-0.78344
319.874	-0.82092
319.681	-0.86501
319.489	-0.88936
319.296	-0.86012
319.103	-0.79849
318.911	-0.75151
318.718	-0.75356
318.525	-0.78453
318.332	-0.81276
318.14	-0.80654
317.947	-0.77118
317.754	-0.7353
317.562	-0.73498
317.369	-0.75835
317.176	-0.77783
316.983	-0.77688
316.791	-0.76956
316.598	-0.75832
316.405	-0.74791
316.213	-0.73952
316.02	-0.73884
315.827	-0.73305
315.635	-0.71822
315.442	-0.69222
315.249	-0.66548
315.056	-0.64578
314.864	-0.6552
314.671	-0.70117
314.478	-0.77451
314.286	-0.84172
314.093	-0.88305
313.9	-0.88975
313.707	-0.87425
313.515	-0.85239
313.322	-0.85362
313.129	-0.88998
312.937	-0.9528
312.744	-1.00855
312.551	-1.04106
312.358	-1.0512
312.166	-1.05892
311.973	-1.07253
311.78	-1.0927
311.588	-1.10494
311.395	-1.10897
311.202	-1.10779
311.009	-1.10196
310.817	-1.07562
310.624	-1.03595
310.431	-1.00253
310.239	-0.98356
310.046	-0.95497
309.853	-0.91166
309.661	-0.87178
309.468	-0.85703
309.275	-0.86085
309.082	-0.87838
308.89	-0.90544
308.697	-0.93447
308.504	-0.93565
308.312	-0.89378
308.119	-0.82595
307.926	-0.77867
307.733	-0.76248
307.541	-0.74446
307.348	-0.69088
307.155	-0.62527
306.963	-0.58519
306.77	-0.58403
306.577	-0.60733
306.384	-0.64743
306.192	-0.68887
305.999	-0.72433
305.806	-0.7616
305.614	-0.81754
305.421	-0.87849
305.228	-0.92575
305.035	-0.95109
304.843	-0.95996
304.65	-0.95723
304.457	-0.96874
304.265	-1.00556
304.072	-1.03858
303.879	-1.02348
303.687	-0.97484
303.494	-0.94003
303.301	-0.94162
303.108	-0.95538
302.916	-0.96023
302.723	-0.94539
302.53	-0.91145
302.338	-0.86481
302.145	-0.83228
301.952	-0.82692
301.759	-0.83022
301.567	-0.80423
301.374	-0.75668
301.181	-0.73707
300.989	-0.77797
300.796	-0.84108
300.603	-0.8746
300.41	-0.86644
300.218	-0.84287
300.025	-0.81988
299.832	-0.80942
299.64	-0.81457
299.447	-0.82351
299.254	-0.80505
299.061	-0.75181
298.869	-0.68588
298.676	-0.64586
298.483	-0.64812
298.291	-0.68118
298.098	-0.70944
297.905	-0.71404
297.712	-0.69821
297.52	-0.67976
297.327	-0.66897
297.134	-0.67673
296.942	-0.69986
296.749	-0.73154
296.556	-0.76939
296.364	-0.81724
296.171	-0.85309
295.978	-0.85676
295.785	-0.83846
295.593	-0.82562
295.4	-0.81441
295.207	-0.79929
295.015	-0.79404
294.822	-0.80861
294.629	-0.81767
294.436	-0.80591
294.244	-0.78035
294.051	-0.75046
293.858	-0.71648
293.666	-0.70006
293.473	-0.7172
293.28	-0.7548
293.087	-0.78381
292.895	-0.79971
292.702	-0.80388
292.509	-0.79837
292.317	-0.79188
292.124	-0.80564
291.931	-0.84152
291.738	-0.88899
291.546	-0.93579
291.353	-0.97439
291.16	-0.98532
290.968	-0.9605
290.775	-0.9167
290.582	-0.89074
290.389	-0.8939
290.197	-0.90405
290.004	-0.8881
289.811	-0.84656
289.619	-0.80209
289.426	-0.77592
289.233	-0.7679
289.041	-0.7709
288.848	-0.76759
288.655	-0.74731
288.462	-0.71578
288.27	-0.69601
288.077	-0.69314
287.884	-0.69758
287.692	-0.70026
287.499	-0.7085
287.306	-0.72925
287.113	-0.77068
286.921	-0.82819
286.728	-0.88146
286.535	-0.90253
286.343	-0.89688
286.15	-0.89496
285.957	-0.91579
285.764	-0.93831
285.572	-0.93915
285.379	-0.91843
285.186	-0.89808
284.994	-0.89242
284.801	-0.91281
284.608	-0.95889
284.415	-1.01025
284.223	-1.02913
284.03	-1.0092
283.837	-0.97817
283.645	-0.96266
283.452	-0.96024
283.259	-0.96857
283.067	-0.98208
282.874	-0.98419
282.681	-0.96607
282.488	-0.95938
282.296	-0.98604
282.103	-1.02092
281.91	-1.0258
281.718	-1.00469
281.525	-0.97205
281.332	-0.93099
281.139	-0.88855
280.947	-0.86525
280.754	-0.85652
280.561	-0.84629
280.369	-0.83653
280.176	-0.84504
279.983	-0.86863
279.79	-0.89505
279.598	-0.91148
279.405	-0.9101
279.212	-0.89263
279.02	-0.88204
278.827	-0.88141
278.634	-0.86131
278.441	-0.8014
278.249	-0.73549
278.056	-0.70639
277.863	-0.72363
277.671	-0.76929
277.478	-0.83481
277.285	-0.9112
277.092	-0.98199
276.9	-1.02441
276.707	-1.02986
276.514	-1.00094
276.322	-0.95415
276.129	-0.90947
275.936	-0.88632
275.744	-0.88268
275.551	-0.88248
275.358	-0.87481
275.165	-0.8729
274.973	-0.88252
274.78	-0.88639
274.587	-0.86139
274.395	-0.81421
274.202	-0.76648
274.009	-0.73846
273.816	-0.73662
273.624	-0.75626
273.431	-0.7757
273.238	-0.77908
273.046	-0.76185
272.853	-0.73033
272.66	-0.69707
272.467	-0.68827
272.275	-0.71089
272.082	-0.74007
271.889	-0.74468
271.697	-0.72344
271.504	-0.68585
271.311	-0.64793
271.118	-0.63118
270.926	-0.64153
270.733	-0.64403
270.54	-0.62042
270.348	-0.60475
270.155	-0.63097
269.962	-0.67287
269.77	-0.70202
269.577	-0.73488
269.384	-0.79309
269.191	-0.8522
268.999	-0.88562
268.806	-0.89646
268.613	-0.89877
268.421	-0.89146
268.228	-0.88259
268.035	-0.88951
267.842	-0.92271
267.65	-0.97226
267.457	-1.02676
267.264	-1.07448
267.072	-1.10429
266.879	-1.10147
266.686	-1.06446
266.493	-1.00562
266.301	-0.9475
266.108	-0.90446
265.915	-0.88739
265.723	-0.90103
265.53	-0.94401
265.337	-1.00297
265.144	-1.06812
264.952	-1.12847
264.759	-1.17154
264.566	-1.18988
264.374	-1.19779
264.181	-1.20625
263.988	-1.20925
263.796	-1.19706
263.603	-1.1803
263.41	-1.1686
263.217	-1.16539
263.025	-1.17929
262.832	-1.2266
262.639	-1.29281
262.447	-1.33517
262.254	-1.32172
262.061	-1.26654
261.868	-1.20543
261.676	-1.1647
261.483	-1.13984
261.29	-1.11382
261.098	-1.07865
260.905	-1.04824
260.712	-1.0308
260.519	-1.01679
260.327	-0.98838
260.134	-0.94224
259.941	-0.8794
259.749	-0.80754
259.556	-0.74679
259.363	-0.72501
259.17	-0.73878
258.978	-0.7563
258.785	-0.75533
258.592	-0.75217
258.4	-0.76802
258.207	-0.80407
258.014	-0.84323
257.821	-0.87217
257.629	-0.8818
257.436	-0.87932
257.243	-0.88417
257.051	-0.91055
256.858	-0.94448
256.665	-0.96893
256.473	-0.98535
256.28	-1.00786
256.087	-1.03119
255.894	-1.03668
255.702	-1.01103
255.509	-0.96365
255.316	-0.91348
255.124	-0.88066
254.931	-0.8763
254.738	-0.90478
254.545	-0.94808
254.353	-0.96872
254.16	-0.93618
253.967	-0.86904
253.775	-0.81815
253.582	-0.82104
253.389	-0.86969
253.196	-0.93
253.004	-0.96813
252.811	-0.98397
252.618	-1.00568
252.426	-1.05002
252.233	-1.08594
252.04	-1.07635
251.847	-1.02195
251.655	-0.95233
251.462	-0.8881
251.269	-0.84957
251.077	-0.85254
250.884	-0.88933
250.691	-0.93196
250.499	-0.97477
250.306	-1.02857
250.113	-1.09431
249.92	-1.15785
249.728	-1.21032
249.535	-1.2428
249.342	-1.25783
249.15	-1.27324
248.957	-1.29812
248.764	-1.30386
248.571	-1.26767
248.379	-1.20817
248.186	-1.16011
247.993	-1.12863
247.801	-1.10677
247.608	-1.09264
247.415	-1.08727
247.222	-1.08685
247.03	-1.09156
246.837	-1.09198
246.644	-1.07709
246.452	-1.0527
246.259	-1.04051
246.066	-1.04154
245.873	-1.04228
245.681	-1.03606
245.488	-1.02513
245.295	-1.00493
245.103	-0.98396
244.91	-0.98364
244.717	-1.01469
244.524	-1.06144
244.332	-1.10809
244.139	-1.14406
243.946	-1.16191
243.754	-1.16095
243.561	-1.15919
243.368	-1.16865
243.176	-1.17967
242.983	-1.16842
242.79	-1.12695
242.597	-1.06462
242.405	-0.9961
242.212	-0.92218
242.019	-0.84373
241.827	-0.77583
241.634	-0.74102
241.441	-0.73517
241.248	-0.7388
241.056	-0.74693
240.863	-0.77166
240.67	-0.8077
240.478	-0.8405
240.285	-0.86494
240.092	-0.87855
239.899	-0.86249
239.707	-0.81362
239.514	-0.75958
239.321	-0.72902
239.129	-0.72052
238.936	-0.73195
238.743	-0.77128
238.55	-0.83264
238.358	-0.88583
238.165	-0.92144
237.972	-0.96007
237.78	-1.01412
237.587	-1.05802
237.394	-1.06682
237.202	-1.04925
237.009	-1.03878
236.816	-1.05135
236.623	-1.07715
236.431	-1.09317
236.238	-1.08544
236.045	-1.05115
235.853	-1.00566
235.66	-0.97345
235.467	-0.9695
235.274	-0.97538
235.082	-0.96444
234.889	-0.93933
234.696	-0.93633
234.504	-0.97667
234.311	-1.04594
234.118	-1.10956
233.925	-1.14346
233.733	-1.14129
233.54	-1.12096
233.347	-1.10589
233.155	-1.10574
232.962	-1.11548
232.769	-1.13994
232.576	-1.17799
232.384	-1.2029
232.191	-1.18285
231.998	-1.12651
231.806	-1.065
231.613	-1.01864
231.42	-0.99583
231.227	-1.00478
231.035	-1.02341
230.842	-1.00728
230.649	-0.94468
230.457	-0.89013
230.264	-0.8776
230.071	-0.90742
229.879	-0.95802
229.686	-1.01931
229.493	-1.08463
229.3	-1.14855
229.108	-1.20471
228.915	-0.84152
228.722	-0.88899
228.53	-0.93579
228.337	-0.97439
228.144	-0.98532
227.951	-0.9605
227.759	-0.9167
227.566	-0.89074
227.373	-0.8939
227.181	-0.90405
226.988	-0.8881
226.795	-0.84656
226.602	-0.80209
226.41	-0.77592
226.217	-0.7679
226.024	-0.7709
225.832	-0.76759
225.639	-0.74731
225.446	-0.71578
225.253	-0.69601
225.061	-0.69314
224.868	-0.69758
224.675	-0.70026
224.483	-0.7085
224.29	-0.72925
224.097	-0.77068
223.905	-0.82819
223.712	-0.88146
223.519	-0.90253
223.326	-0.89688
223.134	-0.89496
222.941	-0.91579
222.748	-0.93831
222.556	-0.93915
222.363	-0.91843
222.17	-0.89808
221.977	-0.89242
221.785	-0.91281
221.592	-0.95889
221.399	-1.01025
221.207	-1.02913
221.014	-1.0092
220.821	-0.97817
220.628	-0.96266
220.436	-0.96024
220.243	-0.96857
220.05	-0.98208
219.858	-0.98419
219.665	-0.96607
219.472	-0.95938
219.279	-0.98604
219.087	-1.02092
218.894	-1.0258
218.701	-1.00469
218.509	-0.97205
218.316	-0.93099
218.123	-0.88855
217.93	-0.86525
217.738	-0.85652
217.545	-0.84629
217.352	-0.83653
217.16	-0.84504
216.967	-0.86863
216.774	-0.89505
216.582	-0.91148
216.389	-0.9101
216.196	-0.89263
216.003	-0.88204
215.811	-0.88141
215.618	-0.86131
215.425	-0.8014
215.233	-0.73549
215.04	-0.70639
214.847	-0.72363
214.654	-0.76929
214.462	-0.83481
214.269	-0.9112
214.076	-0.98199
213.884	-1.02441
213.691	-1.02986
213.498	-1.00094
213.305	-0.95415
213.113	-0.90947
212.92	-0.88632
212.727	-0.88268
212.535	-0.88248
212.342	-0.87481
212.149	-0.8729
211.956	-0.88252
211.764	-0.88639
211.571	-0.86139
211.378	-0.81421
211.186	-0.76648
210.993	-0.73846
210.8	-0.73662
210.607	-0.75626
210.415	-0.7757
210.222	-0.77908
210.029	-0.76185
209.837	-0.73033
209.644	-0.69707
209.451	-0.68827
209.259	-0.71089
209.066	-0.74007
208.873	-0.74468
208.68	-0.72344
208.488	-0.68585
208.295	-0.64793
208.102	-0.63118
207.91	-0.64153
207.717	-0.64403
207.524	-0.62042
207.331	-0.60475
207.139	-0.63097
206.946	-0.67287
206.753	-0.70202
206.561	-0.73488
206.368	-0.79309
206.175	-0.8522
205.982	-0.88562
205.79	-0.89646
205.597	-0.89877
205.404	-0.89146
205.212	-0.88259
205.019	-0.88951
204.826	-0.92271
204.633	-0.97226
204.441	-1.02676
204.248	-1.07448
204.055	-1.10429
203.863	-1.10147
203.67	-1.06446
203.477	-1.00562
203.285	-0.9475
203.092	-0.90446
202.899	-0.88739
202.706	-0.90103
202.514	-0.94401
202.321	-1.00297
202.128	-1.06812
201.936	-1.12847
201.743	-1.17154
201.55	-1.18988
201.357	-1.19779
201.165	-1.20625
200.972	-1.20925
200.779	-1.19706
200.587	-1.1803
200.394	-1.1686
200.201	-1.16539
200.008	-1.17929
199.816	-1.2266
199.623	-1.29281
199.43	-1.33517
199.238	-1.32172
199.045	-1.26654
198.852	-1.20543
198.659	-1.1647
198.467	-1.13984
198.274	-1.11382
198.081	-1.07865
197.889	-1.04824
197.696	-1.0308
197.503	-1.01679
197.31	-0.98838
197.118	-0.94224
196.925	-0.8794
196.732	-0.80754
196.54	-0.74679
196.347	-0.72501
196.154	-0.73878
195.962	-0.7563
195.769	-0.75533
195.576	-0.75217
195.383	-0.76802
195.191	-0.80407
194.998	-0.84323
194.805	-0.87217
194.613	-0.8818
194.42	-0.87932
194.227	-0.88417
194.034	-0.91055
193.842	-0.94448
193.649	-0.96893
193.456	-0.98535
193.264	-1.00786
193.071	-1.03119
192.878	-1.03668
192.685	-1.01103
192.493	-0.96365
192.3	-0.91348
192.107	-0.88066
191.915	-0.8763
191.722	-0.90478
191.529	-0.94808
191.336	-0.96872
191.144	-0.93618
190.951	-0.86904
190.758	-0.81815
190.566	-0.82104
190.373	-0.86969
190.18	-0.93
189.988	-0.96813
189.795	-0.98397
189.602	-1.00568
189.409	-1.05002
189.217	-1.08594
189.024	-1.07635
188.831	-1.02195
188.639	-0.95233
188.446	-0.8881
188.253	-0.84957
188.06	-0.85254
187.868	-0.88933
187.675	-1.38266
187.482	-1.35644
187.29	-1.35026
187.097	-1.35944
186.904	-1.35552
186.711	-1.30891
186.519	-1.2235
186.326	-1.1219
186.133	-1.0198
185.941	-0.92194
185.748	-0.84153
185.555	-0.7964
185.362	-0.79612
185.17	-0.83179
184.977	-0.88992
184.784	-0.92728
184.592	-0.94266
184.399	-0.95793
184.206	-0.96904
184.013	-0.98453
183.821	-1.01976
183.628	-1.07688
183.435	-1.14926
183.243	-1.22569
183.05	-1.2902
182.857	-1.32292
182.665	-1.32615
182.472	-1.32583
182.279	-1.34138
182.086	-1.3564
181.894	-1.34407
181.701	-1.29965
181.508	-1.24057
181.316	-1.17655
181.123	-1.11324
180.93	-1.06734
180.737	-1.05928
180.545	-1.08095
180.352	-1.10342
180.159	-1.10406
179.967	-1.07903
179.774	-1.03395
179.581	-0.99111
179.388	-0.97542
179.196	-0.98588
179.003	-0.99633
178.81	-1.00033
178.618	-1.00979
178.425	-1.02022
178.232	-1.01083
178.039	-0.98257
177.847	-0.94854
177.654	-0.9363
177.461	-0.91454
177.269	-0.90831
177.076	-0.9284
176.883	-0.95649
176.691	-0.97905
176.498	-1.00438
176.305	-1.02512
176.112	-1.0181
175.92	-0.97775
175.727	-0.92242
175.534	-0.86417
175.342	-0.81192
175.149	-0.7768
174.956	-0.75629
174.763	-0.72649
174.571	-0.68378
174.378	-0.65978
174.185	-0.68088
173.993	-0.72493
173.8	-0.75014
173.607	-0.74087
173.414	-0.71314
173.222	-0.68105
173.029	-0.65422
172.836	-0.64872
172.644	-0.67938
172.451	-0.73463
172.258	-0.79175
172.065	-0.83859
171.873	-0.86967
171.68	-0.87308
171.487	-0.85547
171.295	-0.84716
171.102	-0.87026
170.909	-0.91678
170.716	-0.97712
170.524	-1.04919
170.331	-1.12409
170.138	-1.18486
169.946	-1.22735
169.753	-1.25022
169.56	-1.24575
169.368	-1.20812
169.175	-1.14389
168.982	-1.06064
168.789	-0.97474
168.597	-0.91116
168.404	-0.87802
168.211	-0.84888
168.019	-0.80442
167.826	-0.75936
167.633	-0.73254
167.44	-0.70296
167.248	-0.62616
167.055	-0.47248
166.862	-0.24921
166.67	0.01346
166.477	0.28321
166.284	0.54261
166.091	0.78206
165.899	0.99671
165.706	1.18121
165.513	1.3211
165.321	1.38484
165.128	1.35778
164.935	1.27008
164.742	1.17335
164.55	1.08491
164.357	0.98397
164.164	0.84533
163.972	0.67151
163.779	0.49035
163.586	0.33673
163.394	0.22305
163.201	0.14138
163.008	0.08541
162.815	0.05819
162.623	0.04562
162.43	0.018
162.237	-0.04059
162.045	-0.11325
161.852	-0.17591
161.659	-0.22126
161.466	-0.26135
161.274	-0.30095
161.081	-0.32837
160.888	-0.3373
160.696	-0.35589
160.503	-0.41731
160.31	-0.51833
160.117	-0.62822
159.925	-0.73222
159.732	-0.82312
159.539	-0.88094
159.347	-0.89025
159.154	-0.86741
158.961	-0.83717
158.768	-0.8126
158.576	-0.79842
158.383	-0.79524
158.19	-0.79534
157.998	-0.80737
157.805	-0.85363
157.612	-0.92694
157.419	-0.9803
157.227	-0.99362
157.034	-0.99637
156.841	-1.01424
156.649	-1.03581
156.456	-1.05273
156.263	-1.06893
156.071	-1.07075
155.878	-1.03258
155.685	-0.96615
155.492	-0.91019
155.3	-0.87825
155.107	-0.84341
154.914	-0.77973
154.722	-0.68323
154.529	-0.56847
154.336	-0.45525
154.143	-0.35704
153.951	-0.26281
153.758	-0.15553
153.565	-0.04845
153.373	0.01141
153.18	-0.00509
152.987	-0.08547
152.794	-0.20012
152.602	-0.33039
152.409	-0.45757
152.216	-0.56659
152.024	-0.66289
151.831	-0.76606
151.638	-0.87226
151.445	-0.9551
151.253	-0.99154
151.06	-0.97575
150.867	-0.91405
150.675	-0.83581
150.482	-0.7795
150.289	-0.75895
150.097	-0.75703
149.904	-0.76261
149.711	-0.76906
149.518	-0.74915
149.326	-0.67151
149.133	-0.55158
148.94	-0.4358
148.748	-0.34855
148.555	-0.28159
148.362	-0.23063
148.169	-0.19744
147.977	-0.17625
147.784	-0.15741
147.591	-0.14127
147.399	-0.12538
147.206	-0.10608
147.013	-0.09551
146.82	-0.12235
146.628	-0.1955
146.435	-0.29583
146.242	-0.40356
146.05	-0.51798
145.857	-0.63125
145.664	-0.71899
145.471	-0.76739
145.279	-0.79615
145.086	-0.82859
144.893	-0.87073
144.701	-0.92457
144.508	-0.99448
144.315	-1.05255
144.122	-1.04995
143.93	-0.98326
143.737	-0.91781
143.544	-0.90988
143.352	-0.95252
143.159	-1.00796
142.966	-1.05727
142.774	-1.09114
142.581	-1.10355
142.388	-1.10447
142.195	-1.11397
142.003	-1.12738
141.81	-1.12254
141.617	-1.09229
141.425	-1.05029
141.232	-1.00014
141.039	-0.93393
140.846	-0.85455
140.654	-0.78624
140.461	-0.74596
140.268	-0.7228
140.076	-0.6892
139.883	-0.63953
139.69	-0.59541
139.497	-0.57564
139.305	-0.56904
139.112	-0.55907
138.919	-0.55223
138.727	-0.57073
138.534	-0.6168
138.341	-0.67163
138.148	-0.71807
137.956	-0.75418
137.763	-0.7741
137.57	-0.75929
137.378	-0.68926
137.185	-0.56489
136.992	-0.41418
136.799	-0.2896
136.607	-0.24125
136.414	-0.27648
136.221	-0.33647
136.029	-0.34416
135.836	-0.2727
135.643	-0.158
135.451	-0.03948
135.258	0.07657
135.065	0.2008
134.872	0.32706
134.68	0.43752
134.487	0.52465
134.294	0.60778
134.102	0.71662
133.909	0.86424
133.716	1.03195
133.523	1.19204
133.331	1.3319
133.138	1.46204
132.945	1.60138
132.753	1.76403
132.56	1.94306
132.367	2.11271
132.174	2.23989
131.982	2.29741
131.789	2.26582
131.596	2.15125
131.404	1.99269
131.211	1.83631
131.018	1.69257
130.825	1.54486
130.633	1.38647
130.44	1.23251
130.247	1.0924
130.055	0.96662
129.862	0.86239
129.669	0.79123
129.477	0.73738
129.284	0.66745
129.091	0.57719
128.898	0.50546
128.706	0.47509
128.513	0.46269
128.32	0.44214
128.128	0.42346
127.935	0.41265
127.742	0.38942
127.549	0.34721
127.357	0.31258
127.164	0.29366
126.971	0.27368
126.779	0.26012
126.586	0.28357
126.393	0.33419
126.2	0.37062
126.008	0.37859
125.815	0.37219
125.622	0.35058
125.43	0.31276
125.237	0.2764
125.044	0.25093
124.851	0.22387
124.659	0.20376
124.466	0.21827
124.273	0.26104
124.081	0.28074
123.888	0.24275
123.695	0.16376
123.502	0.09558
123.31	0.08141
123.117	0.12111
122.924	0.16978
122.732	0.19569
122.539	0.21438
122.346	0.2519
122.154	0.29955
121.961	0.34015
121.768	0.37589
121.575	0.4146
121.383	0.45295
121.19	0.49237
120.997	0.53483
120.805	0.57152
120.612	0.59401
120.419	0.61554
120.226	0.65284
120.034	0.70332
119.841	0.7428
119.648	0.74771
119.456	0.71683
119.263	0.68199
119.07	0.67358
118.877	0.68502
118.685	0.68745
118.492	0.67474
118.299	0.65295
118.107	0.61298
117.914	0.54765
117.721	0.48421
117.528	0.45375
117.336	0.45451
117.143	0.46453
116.95	0.47078
116.758	0.45491
116.565	0.38732
116.372	0.2546
116.18	0.08704
115.987	-0.06068
115.794	-0.14457
115.601	-0.16118
115.409	-0.14449
115.216	-0.13592
115.023	-0.15035
114.831	-0.18352
114.638	-0.22839
114.445	-0.27431
114.252	-0.30075
114.06	-0.30159
113.867	-0.29383
113.674	-0.29488
113.482	-0.29888
113.289	-0.29091
113.096	-0.26031
112.903	-0.20662
112.711	-0.1404
112.518	-0.08008
112.325	-0.03068
112.133	0.01148
111.94	0.0368
111.747	0.02617
111.554	-0.01207
111.362	-0.05111
111.169	-0.08721
110.976	-0.1448
110.784	-0.23225
110.591	-0.33292
110.398	-0.42913
110.206	-0.5139
110.013	-0.57985
109.82	-0.63014
109.627	-0.68555
109.435	-0.76648
109.242	-0.86257
109.049	-0.94042
108.857	-0.97603
108.664	-0.98042
108.471	-0.97941
108.278	-0.98059
108.086	-0.9691
107.893	-0.93983
107.7	-0.90247
107.508	-0.86582
107.315	-0.83717
107.122	-0.83353
106.929	-0.85488
106.737	-0.87166
106.544	-0.86381
106.351	-0.85295
106.159	-0.86188
105.966	-0.88791
105.773	-0.93128
105.58	-1.00869
105.388	-1.05571
105.195	-1.07285
105.002	-1.08833
104.81	-1.08681
104.617	-1.05181
104.424	-0.98372
104.231	-0.91653
104.039	-0.89234
103.846	-0.91036
103.653	-0.92941
103.461	-0.92136
103.268	-0.89703
103.075	-0.88474
102.883	-0.90518
102.69	-0.95503
102.497	-1.00408
102.304	-1.02425
102.112	-1.02245
101.919	-1.02327
101.726	-1.02772
101.534	-1.01543
101.341	-0.98279
101.148	-0.9568
100.955	-0.97016
100.763	-1.0255
100.57	-1.08313
100.377	-1.0933
100.185	-1.04593
99.9919	-0.974
99.7991	-0.90743
99.6064	-0.84716
99.4137	-0.78723
99.221	-0.73629
99.0283	-0.71011
98.8356	-0.71881
98.6429	-0.76487
98.4502	-0.8416
98.2575	-0.92759
98.0648	-0.98848
97.8721	-0.99849
97.6793	-0.96994
97.4866	-0.94857
97.2939	-0.96357
97.1012	-0.99439
96.9085	-1.00194
96.7158	-0.9754
96.5231	-0.93516
96.3304	-0.90831
96.1377	-0.91122
95.945	-0.93716
95.7522	-0.95873
95.5595	-0.95605
95.3668	-0.93535
95.1741	-0.90936
94.9814	-0.87894
94.7887	-1.12279
94.596	-1.13308
94.4033	-1.09908
94.2106	-1.03039
94.0178	-0.95012
93.8251	-0.88065
93.6324	-0.83574
93.4397	-0.81237
93.247	-0.81043
93.0543	-0.84224
92.8616	-0.90423
92.6689	-0.95391
92.4762	-0.95639
92.2835	-0.92349
92.0907	-0.88672
91.898	-0.86023
91.7053	-0.85953
91.5126	-0.90525
91.3199	-0.99106
91.1272	-1.07714
90.9345	-1.13434
90.7418	-1.16228
90.5491	-1.17476
90.3564	-1.18297
90.1637	-1.19288
89.9709	-1.20231
89.7782	-1.21113
89.5855	-1.21618
89.3928	-1.19955
89.2001	-1.14519
89.0074	-1.07925
88.8147	-1.05048
88.622	-1.07699
88.4292	-1.13821
88.2365	-1.20823
88.0438	-1.25532
87.8511	-1.24809
87.6584	-1.19365
87.4657	-1.14392
87.273	-1.13028
87.0803	-1.13127
86.8876	-1.1102
86.6949	-1.05829
86.5022	-0.99289
86.3094	-0.94575
86.1167	-0.93667
85.924	-0.95054
85.7313	-0.95354
85.5386	-0.94219
85.3459	-0.9409
85.1532	-0.96013
84.9605	-0.98223
84.7678	-0.9923
84.5751	-0.98984
84.3823	-0.98145
84.1896	-0.97503
83.9969	-0.98383
83.8042	-1.01467
83.6115	-1.05622
83.4188	-1.07893
83.2261	-1.06251
83.0334	-1.01838
82.8407	-0.97908
82.6479	-0.95721
82.4552	-0.93906
82.2625	-0.91344
82.0698	-0.88816
81.8771	-0.86804
81.6844	-0.84903
81.4917	-0.83121
81.299	-0.81946
81.1063	-0.80421
80.9136	-0.7721
80.7208	-0.7287
80.5281	-0.69227
80.3354	-0.65781
80.1427	-0.60168
79.95	-0.52077
79.7573	-0.44565
79.5646	-0.39693
79.3719	-0.36161
79.1792	-0.31963
78.9865	-0.27372
78.7938	-0.23115
78.601	-0.18784
78.4083	-0.14112
78.2156	-0.10669
78.0229	-0.10519
77.8302	-0.14682
77.6375	-0.21992
77.4448	-0.2928
77.2521	-0.33164
77.0593	-0.33137
76.8666	-0.31384
76.6739	-0.30481
76.4812	-0.31658
76.2885	-0.34668
76.0958	-0.37483
75.9031	-0.38301
75.7104	-0.37842
75.5177	-0.3843
75.325	-0.40474
75.1322	-0.4274
74.9395	-0.44479
74.7468	-0.45793
74.5541	-0.46397
74.3614	-0.45923
74.1687	-0.43701
73.976	-0.39313
73.7833	-0.34165
73.5906	-0.31098
73.3979	-0.3007
73.2052	-0.27956
73.0124	-0.23379
72.8197	-0.18382
72.627	-0.13787
72.4343	-0.08001
72.2416	-0.00202
72.0489	0.08956
71.8562	0.20106
71.6635	0.34134
71.4708	0.49829
71.278	0.65167
71.0853	0.80571
70.8926	0.97441
70.6999	1.14399
70.5072	1.26413
70.3145	1.29213
70.1218	1.23548
69.9291	1.14415
69.7364	1.05523
69.5437	0.97153
69.3509	0.89108
69.1582	0.83083
68.9655	0.80149
68.7728	0.79316
68.5801	0.79648
68.3874	0.82575
68.1947	0.90243
68.002	1.02876
67.8093	1.17404
67.6166	1.29246
67.4239	1.35121
67.2311	1.34805
67.0384	1.29894
66.8457	1.22462
66.653	1.13816
66.4603	1.03677
66.2676	0.90578
66.0749	0.74699
65.8822	0.58292
65.6895	0.43269
65.4967	0.30048
65.304	0.1955
65.1113	0.12589
64.9186	0.0771
64.7259	0.02162
64.5332	-0.04373
64.3405	-0.10176
64.1478	-0.14516
63.9551	-0.18467
63.7623	-0.22302
63.5696	-0.24518
63.3769	-0.23778
63.1842	-0.21915
62.9915	-0.22636
62.7988	-0.26926
62.6061	-0.31289
62.4134	-0.32608
62.2207	-0.31287
62.028	-0.28802
61.8353	-0.25569
61.6425	-0.23559
61.4498	-0.25624
61.2571	-0.30812
61.0644	-0.3414
60.8717	-0.32955
60.679	-0.29149
60.4863	-0.25682
60.2936	-0.2417
60.1009	-0.25639
59.9081	-0.29391
59.7154	-0.32747
59.5227	-0.34056
59.33	-0.35124
59.1373	-0.38249
58.9446	-0.43458
58.7519	-0.49325
58.5592	-0.54951
58.3665	-0.59512
58.1738	-0.62281
57.9811	-0.63091
57.7883	-0.62357
57.5956	-0.60726
57.4029	-0.60138
57.2102	-0.6283
57.0175	-0.68536
56.8248	-0.74361
56.6321	-0.79204
56.4394	-0.84637
56.2467	-0.9065
56.054	-0.93936
55.8612	-0.92977
55.6685	-0.90388
55.4758	-0.88799
55.2831	-0.87422
55.0904	-0.84962
54.8977	-0.82094
54.705	-0.8028
54.5123	-0.79971
54.3196	-0.81131
54.1268	-0.8337
53.9341	-0.86198
53.7414	-0.89204
53.5487	-0.91971
53.356	-0.93808
53.1633	-0.95166
52.9706	-0.97121
52.7779	-1.00017
52.5852	-1.0019
52.3924	-0.9716
52.1997	-0.95057
52.007	-0.97168
51.8143	-1.02171
51.6216	-1.07465
51.4289	-1.12783
51.2362	-1.18946
51.0435	-1.24234
50.8508	-1.25261
50.6581	-1.21401
50.4654	-1.16863
50.2726	-1.16024
50.0799	-1.18758
49.8872	-1.21944
49.6945	-1.23826
49.5018	-1.23408
49.3091	-1.1908
49.1164	-1.11107
48.9237	-1.03111
48.731	-0.97207
48.5382	-0.91595
48.3455	-0.84943
48.1528	-0.79536
47.9601	-0.77385
47.7674	-0.77967
47.5747	-0.80459
47.382	-0.84395
47.1893	-0.87276
46.9966	-0.86615
46.8039	-0.83845
46.6112	-0.82675
46.4184	-0.83573
46.2257	-0.84069
46.033	-0.8307
45.8403	-0.81886
45.6476	-0.81415
45.4549	-0.82101
45.2622	-0.82512
45.0695	-0.86071
44.8768	-0.92958
44.684	-1.01947
44.4913	-1.12461
44.2986	-1.23244
44.1059	-1.31379
43.9132	-1.34965
43.7205	-1.34368
43.5278	-1.30743
43.3351	-1.25501
43.1424	-1.21514
42.9497	-1.20638
42.757	-1.2101
42.5642	-1.19827
42.3715	-1.18259
42.1788	-1.19472
41.9861	-1.2349
41.7934	-1.26372
41.6007	-1.2435
41.408	-1.17483
41.2153	-1.10594
41.0226	-1.0897
40.8298	-1.12506
40.6371	-1.16039
40.4444	-1.16406
40.2517	-1.14611
40.059	-1.11733
39.8663	-1.07683
39.6736	-1.04246
39.4809	-1.03299
39.2882	-1.03259
39.0954	-1.01461
38.9027	-0.98814
38.71	-0.97864
38.5173	-0.99267
38.3246	-1.02324
38.1319	-1.06569
37.9392	-1.1065
37.7465	-1.12602
37.5538	-1.11298
37.3611	-1.06824
37.1683	-1.00214
36.9756	-0.9419
36.7829	-0.9139
36.5902	-0.91671
36.3975	-0.92737
36.2048	-0.93556
36.0121	-0.94506
35.8194	-0.971
35.6267	-0.98181
35.434	-0.96433
35.2413	-0.92444
35.0485	-0.88967
34.8558	-0.88103
34.6631	-0.88472
34.4704	-0.87168
34.2777	-0.84977
34.085	-0.85669
33.8923	-0.90124
33.6996	-0.94437
33.5069	-0.95049
33.3141	-0.92111
33.1214	-0.8784
32.9287	-0.83979
32.736	-0.81704
32.5433	-0.8104
32.3506	-0.8026
32.1579	-0.77213
31.9652	-0.7203
31.7725	-0.66633
31.5798	-0.6222
31.387	-0.58619
31.1943	-0.56418
31.0016	-0.56763
30.8089	-0.5896
30.6162	-0.60043
30.4235	-0.57841
30.2308	-0.52266
30.0381	-0.44039
29.8454	-0.33781
29.6527	-0.22863
29.4599	-0.12585
29.2672	-0.02478
29.0745	0.09593
28.8818	0.24423
28.6891	0.39498
28.4964	0.50354
28.3037	0.54614
28.111	0.53533
27.9183	0.49791
27.7255	0.44777
27.5328	0.39003
27.3401	0.32543
27.1474	0.24613
26.9547	0.14514
26.762	0.04002
26.5693	-0.04028
26.3766	-0.08559
26.1839	-0.10359
25.9912	-0.09593
25.7984	-0.06607
25.6057	-0.03515
25.413	-0.03357
25.2203	-0.07835
25.0276	-0.16436
24.8349	-0.25927
24.6422	-0.32212
24.4495	-0.34043
24.2568	-0.33936
24.0641	-0.34003
23.8713	-0.34024
23.6786	-0.34028
23.4859	-0.35902
23.2932	-0.40746
23.1005	-0.47268
22.9078	-0.52668
22.7151	-0.54458
22.5224	-0.52118
22.3297	-0.48244
22.137	-0.46012
21.9443	-0.45611
21.7515	-0.44493
21.5588	-0.41402
21.3661	-0.38202
21.1734	-0.38305
20.9807	-0.43481
20.788	-0.52173
20.5953	-0.60701
20.4026	-0.66804
20.2099	-0.70504
20.0172	-0.72172
19.8244	-0.71865
19.6317	-0.71117
19.439	-0.72238
19.2463	-0.75709
19.0536	-0.79652
18.8609	-0.8207
18.6682	-0.82221
18.4755	-0.81119
18.2828	-0.80606
18.0901	-0.81092
17.8973	-0.80554
17.7046	-0.77732
17.5119	-0.74258
17.3192	-0.72365
17.1265	-0.72564
16.9338	-0.75429
16.7411	-0.81691
16.5484	-0.89139
16.3557	-0.93017
16.1629	-0.9186
15.9702	-0.88821
15.7775	-0.86293
15.5848	-0.83192
15.3921	-0.79235
15.1994	-0.76823
15.0067	-0.7716
14.814	-0.7821
14.6213	-0.78297
14.4285	-0.77623
14.2358	-0.75903
14.0431	-0.72186
13.8504	-0.67812
13.6577	-0.65356
13.465	-0.65036
13.2723	-0.6523
13.0796	-0.6599
12.8869	-0.68325
12.6942	-0.7162
12.5015	-0.74152
12.3087	-0.7507
12.116	-0.74228
11.9233	-0.7278
11.7306	-0.73788
11.5379	-0.79236
11.3452	-0.861
11.1525	-0.8908
10.9598	-0.8651
10.7671	-0.81535
10.5744	-0.78444
10.3816	-0.80073
10.1889	-0.86234
9.99622	-0.93221
9.80351	-0.96435
9.6108	-0.94868
9.41809	-0.91161
9.22538	-0.87863
9.03267	-0.85246
8.83996	-0.82824
8.64725	-0.80911
8.45454	-0.80768
8.26183	-0.83294
8.06912	-0.87863
7.87641	-0.92403
7.6837	-0.95336
7.49099	-0.96808
7.29828	-0.98272
7.10557	-1.00821
6.91286	-1.04077
6.72015	-1.06335
6.52744	-1.06534
6.33473	-1.05079
6.14202	-1.02385
5.94931	-0.98053
5.7566	-0.93206
5.56388	-0.90854
5.37117	-0.92027
5.17846	-0.93662
4.98575	-0.92875
4.79304	-0.90457
4.60033	-0.88484
4.40762	-0.87168
4.21491	-0.86474
4.0222	-0.87473
3.82949	-0.90036
3.63678	-0.91545
3.44407	-0.90343
3.25136	-0.88005
3.05865	-0.86904
2.86594	-0.8756
2.67323	-0.89896
2.48052	-0.94148
2.28781	-0.99337
2.0951	-1.0313
1.90239	-1.0476
1.70968	-1.05496
1.51697	-1.05828
1.32426	-1.04649
1.13155	-1.01985
0.93884	-0.99595
0.74613	-0.98725
0.55342	-0.99151
0.36071	-1.00372
0.168	-1.01724
-0.02471	-1.02206
-0.21742	-1.00924
-0.41013	-0.97225
-0.60284	-0.9096
-0.79555	-0.84885
-0.98826	-0.8452
-1.18097	-0.92208
-1.37368	-1.02792
-1.56639	-1.09107
-1.7591	-1.09609
-1.95181	-1.07647
-2.14452	-1.05791
-2.33723	-1.04561
-2.52994	-1.04037
-2.72265	-1.0384
-2.91536	-1.02927
-3.10807	-1.01141
-3.30078	-0.99287
-3.49349	-0.97967
-3.6862	-0.97824
-3.87891	-0.99938
-4.07162	-1.03716
-4.26433	-1.06243
-4.45704	-1.05568
-4.64975	-1.03214
-4.84246	-1.02006
-5.03517	-1.03582
-5.22788	-1.08218
-5.42059	-1.14753
-5.6133	-1.20219
-5.80601	-1.22162
-5.99872	-1.21121
-6.19143	-1.19323
-6.38415	-1.1755
-6.57686	-1.14908
-6.76957	-1.10578
-6.96228	-1.0527
-7.15499	-1.01512
-7.3477	-1.01876
-7.54041	-1.0579
-7.73312	-1.10296
-7.92583	-1.14312
-8.11854	-1.18476
-8.31125	-1.20276
-8.50396	-1.15551
-8.69667	-1.05901
-8.88938	-0.98346
-9.08209	-0.96166
-9.2748	-0.96366
-9.46751	-0.96283
-9.66022	-0.96451
-9.85293	-0.96969
-10.0456	-0.97064
-10.2384	-0.97594
-10.4311	-0.99742
-10.6238	-1.02436
-10.8165	-1.04237
-11.0092	-1.05571
-11.2019	-1.07285
-11.3946	-1.08833
-11.5873	-1.08681
-11.78	-1.05181
-11.9727	-0.98372
-12.1654	-0.91653
-12.3582	-0.89234
-12.5509	-0.91036
-12.7436	-0.92941
-12.9363	-0.92136
-13.129	-0.89703
-13.3217	-0.88474
-13.5144	-0.90518
-13.7071	-0.95503
-13.8998	-1.00408
-14.0925	-1.02425
-14.2853	-1.02245
-14.478	-1.02327
-14.6707	-1.02772
-14.8634	-1.01543
-15.0561	-0.98279
-15.2488	-0.9568
-15.4415	-0.97016
-15.6342	-1.0255
-15.8269	-1.08313
-16.0196	-1.0933
-16.2124	-1.04593
-16.4051	-0.974
-16.5978	-0.90743
-16.7905	-0.84716
-16.9832	-0.78723
-17.1759	-0.73629
-17.3686	-0.71011
-17.5613	-0.71881
-17.754	-0.76487
-17.9468	-0.8416
-18.1395	-0.92759
-18.3322	-0.98848
-18.5249	-0.99849
-18.7176	-0.96994
-18.9103	-0.94857
-19.103	-0.96357
-19.2957	-0.99439
-19.4884	-1.00194
-19.6811	-0.9754
-19.8739	-0.93516
-20.0666	-0.90831
-20.2593	-0.91122
-20.452	-0.93716
-20.6447	-0.95873
-20.8374	-0.95605
-21.0301	-0.93535
-21.2228	-0.90936
-21.4155	-0.87894
-21.6083	-0.84416
-21.801	-0.81428
-21.9937	-0.80126
-22.1864	-0.81715
-22.3791	-0.86576
-22.5718	-0.92355
-22.7645	-0.95179
-22.9572	-0.94382
-23.1499	-0.93026
-23.3426	-0.92832
-23.5354	-0.92127
-23.7281	-0.89711
-23.9208	-0.86809
-24.1135	-0.8464
-24.3062	-0.83356
-24.4989	-0.83672
-24.6916	-0.86137
-24.8843	-0.88888
-25.077	-0.89157
-25.2697	-0.8743
-25.4625	-0.87083
-25.6552	-0.8952
-25.8479	-0.92313
-26.0406	-0.93257
-26.2333	-0.93047
-26.426	-0.92597
-26.6187	-0.90889
-26.8114	-0.87993
-27.0041	-0.86553
-27.1968	-0.87586
-27.3895	-0.87957
-27.5823	-0.85086
-27.775	-0.80618
-27.9677	-0.7715
-28.1604	-0.74477
-28.3531	-0.71426
-28.5458	-0.68041
-28.7385	-0.64831
-28.9312	-0.62309
-29.1239	-0.61919
-29.3166	-0.64639
-29.5094	-0.69353
-29.7021	-0.74268
-29.8948	-0.79005
-30.0875	-0.83267
-30.2802	-0.85534
-30.4729	-0.84477
-30.6656	-0.80629
-30.8583	-0.75488
-31.0511	-0.70647
-31.2438	-0.67575
-31.4365	-0.67135
-31.6292	-0.68729
-31.8219	-0.70988
-32.0146	-0.72672
-32.2073	-0.73338
-32.4	-0.73763
-32.5927	-0.75879
-32.7854	-0.80463
-32.9781	-0.85661
-33.1709	-0.88754
-33.3636	-0.89194
-33.5563	-0.88238
-33.749	-0.87129
-33.9417	-0.86517
-34.1344	-0.86968
-34.3271	-0.88309
-34.5198	-0.89893
-34.7125	-0.91428
-34.9053	-0.92937
-35.098	-0.93682
-35.2907	-0.93205
-35.4834	-0.92215
-35.6761	-0.91306
-35.8688	-0.89425
-36.0615	-0.86047
-36.2542	-0.83059
-36.4469	-0.83216
-36.6396	-0.86876
-36.8323	-0.91761
-37.0251	-0.94712
-37.2178	-0.94518
-37.4105	-0.92951
-37.6032	-0.92481
-37.7959	-0.92286
-37.9886	-0.901
-38.1813	-0.8737
-38.374	-0.88577
-38.5667	-0.9384
-38.7595	-0.98098
-38.9522	-0.98294
-39.1449	-0.97108
-39.3376	-0.97531
-39.5303	-0.99293
-39.723	-1.0099
-39.9157	-1.02314
-40.1084	-1.02542
-40.3011	-1.01078
-40.4938	-0.98894
-40.6865	-0.9762
-40.8793	-0.96816
-41.072	-0.95263
-41.2647	-0.93112
-41.4574	-0.91631
-41.6501	-0.9085
-41.8428	-0.90175
-42.0355	-0.8949
-42.2282	-0.89226
-42.4209	-0.89029
-42.6137	-0.8861
-42.8064	-0.88298
-42.9991	-0.88643
-43.1918	-0.88678
-43.3845	-0.86871
-43.5772	-0.82807
-43.7699	-0.77978
-43.9626	-0.73544
-44.1553	-0.69891
-44.3481	-0.67827
-44.5408	-0.69529
-44.7335	-0.75259
-44.9262	-0.81841
-45.1189	-0.85322
-45.3116	-0.85609
-45.5043	-0.85101
-45.697	-0.85245
-45.8897	-0.85357
-46.0824	-0.85461
-46.2751	-0.86403
-46.4679	-0.89079
-46.6606	-0.93508
-46.8533	-0.99342
-47.046	-1.04614
-47.2387	-1.07092
-47.4314	-1.06122
-47.6241	-1.0325
-47.8168	-0.98945
-48.0095	-0.92971
-48.2022	-0.86581
-48.395	-0.83253
-48.5877	-0.84061
-48.7804	-0.86517
-48.9731	-0.87297
-49.1658	-0.86422
-49.3585	-0.85401
-49.5512	-0.8486
-49.7439	-0.83658
-49.9366	-0.82086
-50.1294	-0.81659
-50.3221	-0.83439
-50.5148	-0.8569
-50.7075	-0.86787
-50.9002	-0.86912
-51.0929	-0.88127
-51.2856	-0.90699
[truncated: 48 more rows]

## Sheet: Figure 2c
195 K CO2				273 K CO2				298 K CO2				77 K N2				87 K Ar
3e-09	0.5616	0.99547	244.74	4.364e-06	0.0139	0.99655	80.1691	0.00345	0.0002	0.99384	9.7692	2e-09	0	0.9901	52.9452	3e-09	0.0017	0.9947	30.5934
0.00273	7.2213	0.95175	232.639	0.00178	0.0139	0.92057	80.1691	0.02102	0.1828	0.94644	9.7692	0.00213	0.4744	0.96076	39.4771	0.00188	0.6585	0.95926	25.1495
0.00702	12.5666	0.91389	231.157	0.00253	0.0139	0.85508	77.2844	0.03878	0.3836	0.91115	9.5474	0.01326	0.8089	0.94204	34.4513	0.01537	1.2896	0.91434	21.0695
0.01188	17.4073	0.89037	230.223	0.00801	0.0779	0.77929	74.5282	0.05635	0.5996	0.89087	9.4365	0.03586	1.1591	0.91431	30.8405	0.02937	1.6416	0.88842	19.5818
0.01659	22.2234	0.83075	228.218	0.00951	0.1062	0.73221	72.0715	0.07337	0.8115	0.85366	9.3255	0.04719	1.2725	0.88787	28.8351	0.04351	1.8953	0.84004	17.9079
0.01835	29.8958	0.78241	226.4	0.0349	0.6182	0.67146	66.8208	0.09072	0.9826	0.78695	9.2146	0.07908	1.6049	0.83528	26.1763	0.05761	2.1633	0.79956	16.6597
0.02075	36.7298	0.73448	224.272	0.06039	1.1183	0.63389	59.9529	0.10774	1.2168	0.73827	8.9919	0.10251	1.8675	0.78328	23.6382	0.07175	2.3729	0.73759	15.0896
0.02371	43.0367	0.68664	222.058	0.08545	1.6532	0.59201	48.0249	0.12485	1.3877	0.68568	8.7241	0.11365	2.0433	0.74123	21.6468	0.10608	2.865	0.69868	14.1148
0.02486	51.1466	0.63664	219.733	0.11032	2.1835	0.53369	40.25	0.14188	1.5606	0.63971	8.4453	0.12446	2.2203	0.69053	19.5119	0.12013	3.0812	0.63925	12.8587
0.02838	56.9265	0.59222	217.27	0.13501	2.6706	0.47884	34.812	0.15876	1.7479	0.58644	8.1207	0.14642	2.5051	0.64006	17.645	0.13667	3.3169	0.58944	11.8614
0.03147	63.0572	0.54508	214.332	0.15913	3.2012	0.42281	31.6826	0.17505	1.9319	0.52844	7.6918	0.17022	2.8018	0.58982	15.8874	0.15067	3.5033	0.54499	10.9758
0.03619	67.6052	0.48911	210.506	0.18316	3.7054	0.37494	29.3982	0.19157	2.1498	0.48279	7.2943	0.19485	3.1244	0.54074	14.177	0.16454	3.6886	0.49323	10.0406
0.04104	71.9768	0.44438	206.481	0.20691	4.1978	0.32519	27.2304	0.20818	2.3211	0.42979	6.6902	0.21916	3.5617	0.4917	12.5928	0.1784	3.885	0.45062	9.3092
0.04663	75.578	0.39409	200.799	0.23047	4.695	0.28289	25.2763	0.22451	2.5153	0.38602	6.1385	0.24347	4.0218	0.44096	11.0803	0.19222	4.0737	0.38921	8.2288
0.05296	78.5206	0.34783	194.031	0.2539	5.1719	0.23614	23.309	0.24085	2.6929	0.32995	5.8004	0.26866	4.407	0.39058	9.7381	0.20599	4.2656	0.34161	7.4806
0.06017	80.6277	0.30258	184.461	0.27704	5.7138	0.18883	21.2125	0.25727	2.8516	0.28829	5.4633	0.29375	4.9027	0.34085	8.4386	0.21971	4.483	0.29642	6.7694
0.07441	85.1747	0.25803	170.881	0.29999	6.251	0.12873	18.7927	0.27361	2.9902	0.23195	4.9422	0.34478	5.8747	0.29302	7.3228	0.23695	4.7241	0.24083	5.9441
0.08171	87.0365	0.21985	141.919	0.32716	6.8324			0.28994	3.1399	0.19143	4.518	0.39478	7.0419	0.2431	6.2217	0.25063	4.9227	0.19083	5.2139
0.08901	88.8757	0.20779	129.195	0.34969	7.4047			0.306	3.3182	0.13839	3.9668	0.44456	8.2587	0.19245	5.2566	0.26426	5.1246	0.14841	4.5906
0.105	91.3682	0.16051	109.179	0.37831	8.1458			0.33298	3.5571	0.08801	3.3385	0.49401	9.6129	0.14309	4.3543	0.2778	5.3442	0.09952	3.869
0.12118	93.7949	0.10232	97.3939	0.40042	8.7629			0.3484	3.778	0.0513	2.7561	0.54374	11.0892	0.09798	3.6067	0.29134	5.5417	0.06112	3.2108
0.14586	97.0255			0.42665	9.4652			0.3918	4.1887			0.59319	12.6249	0.06114	2.9458	0.30479	5.7459
0.17049	100.184			0.44858	10.0584			0.43952	4.5976			0.64218	14.3504			0.34933	6.3213
0.19527	102.489			0.4764	10.8639			0.48889	4.9919			0.69136	16.2404			0.38782	6.912
0.21999	104.655			0.49776	11.5201			0.53808	5.3569			0.74076	18.2851			0.43764	7.683
0.24453	106.701			0.52015	14.0002			0.58644	5.8304			0.79045	20.4292			0.48801	8.5024
0.2712	109.379			0.54165	14.4841			0.63709	6.2973			0.83958	22.8736			0.53819	9.3682
0.29815	111.474			0.57121	15.1531			0.68697	6.883			0.88884	25.6286			0.58889	10.2858
0.34741	115.34			0.59196	15.7434			0.7368	7.3859			0.93843	29.0629			0.63847	11.283
0.39784	119.002			0.62124	16.3619			0.78635	7.9177			0.97555	35.3311			0.68861	12.3397
0.44743	122.274			0.64124	17.0975			0.8365	8.2118			0.9901	52.9452			0.73925	13.4702
0.49725	125.865			0.6708	18.259			0.88528	8.7844							0.78958	14.7122
0.54573	130.297			0.6893	19.4203			0.9346	9.12							0.83934	16.1817
0.59856	134.741			0.71582	21.5456			0.97865	9.5753							0.88916	17.9677
0.64297	142.192			0.73231	23.2769			0.99384	9.7692							0.93782	20.7305
0.697	151.968			0.74875	24.9566			--	--							0.97848	25.623
0.73929	161.459			0.77194	26.5757			--	--							0.9947	30.5934
0.79225	171.977			0.78561	29.0965			--	--
0.83454	187.847			0.82239	33.077			--	--
0.88838	202.129			0.8326	36.6956			--	--
0.94574	217.532			0.8452	39.5217			--	--
0.98682	225.742			0.8645	43.7733			--	--
0.99547	244.74			0.8779	47.0485			--	--
				0.88511	51.5606			--	--
				0.92212	59.0576			--	--
				0.93575	63.6887			--	--
				0.96807	71.1279			--	--
				0.98128	75.6511			--	--
				0.99655	80.1691			--	--

## Sheet: Figure 2d
Activated		THF		DMF
5	28472.6	5	20364.8	5	23530.6
5.02	28356.8	5.02	21381.9	5.02	21735.3
5.04	27610.6	5.04	20610.1	5.04	23807.4
5.06	27758.2	5.06	20631.6	5.06	22596.4
5.08	26414	5.08	19617	5.08	22113.1
5.1	28336	5.1	19917	5.1	22041.4
5.12	27228.9	5.12	21164	5.12	22302.1
5.14	27642.7	5.14	21038.2	5.14	22386.4
5.16	27427.9	5.16	20471.1	5.16	22724.9
5.18	27436.3	5.18	19352.6	5.18	22085.6
5.2	27620.1	5.2	21732.2	5.2	22171.7
5.22	26827.7	5.22	20171.3	5.22	21414.6
5.24	26488.6	5.24	19274.8	5.24	22257.8
5.26	27112	5.26	19834.7	5.26	21588.3
5.28	25887.6	5.28	20233.6	5.28	23058.9
5.3	26887.4	5.3	18451.5	5.3	21645.7
5.32	28340.4	5.32	21195.9	5.32	22378.8
5.34	26672.6	5.34	19649.3	5.34	22446.6
5.36	26808.7	5.36	19525.6	5.36	21585.9
5.38	27829.6	5.38	19304.5	5.38	20804.3
5.4	27200.5	5.4	20152.5	5.4	21710.2
5.42	27292.7	5.42	18985.3	5.42	21351.5
5.44	26712.5	5.44	19092.7	5.44	21981.9
5.46	26799.9	5.46	19270.5	5.46	21479.2
5.48	26851.5	5.48	20639	5.48	21300.2
5.5	25832.1	5.5	19684.6	5.5	22321.9
5.52	26452	5.52	18186.3	5.52	21595.5
5.54	25887.4	5.54	18698	5.54	21466.6
5.56	26287.7	5.56	18428.7	5.56	21365.5
5.58	25115.1	5.58	18228.6	5.58	21419.5
5.6	27170.8	5.6	18532.3	5.6	21080.8
5.62	25740.4	5.62	19296.2	5.62	21889.7
5.64	26691.2	5.64	18612.9	5.64	22110.7
5.66	26857.7	5.66	18732.1	5.66	21586.1
5.68	26413.9	5.68	19261.6	5.68	20934.5
5.7	27367.8	5.7	18818.3	5.7	20361.4
5.72	26704.1	5.72	19296.9	5.72	21742.5
5.74	26493.4	5.74	18905.9	5.74	21558.6
5.76	26006.1	5.76	18876.4	5.76	20185.2
5.78	26045.6	5.78	18465.3	5.78	22508.4
5.8	25763	5.8	18911.1	5.8	21017.8
5.82	25795.1	5.82	18794.7	5.82	22581.5
5.84	26239.1	5.84	20110.8	5.84	22072.1
5.86	25799.1	5.86	19693.1	5.86	19675.9
5.88	26065.7	5.88	19736.8	5.88	20933.5
5.9	25197.2	5.9	20914.1	5.9	19603.5
5.92	27486	5.92	19053.1	5.92	22274.6
5.94	26916.7	5.94	17495.7	5.94	21123.3
5.96	26820.1	5.96	18972.8	5.96	20294.2
5.98	26175.3	5.98	18682.5	5.98	19825.9
6	25043.2	6	18377.9	6	21324.9
6.02	26088.2	6.02	17395.3	6.02	22455.4
6.04	25905.7	6.04	17900.1	6.04	20990.1
6.06	25721.4	6.06	17914.3	6.06	21362.3
6.08	25908.1	6.08	17406.7	6.08	21858.8
6.1	25812.7	6.1	18088.1	6.1	22058
6.12	25255.2	6.12	16456.2	6.12	22241.4
6.14	24731.7	6.14	18099.7	6.14	22259.5
6.16	26079.8	6.16	17116.6	6.16	22549.4
6.18	24867.5	6.18	17698.4	6.18	22066.9
6.2	24867.9	6.2	17930	6.2	24209.6
6.22	24923.9	6.22	17261.4	6.22	24806.6
6.24	24713.9	6.24	19437.3	6.24	27044.9
6.26	25329.5	6.26	17713.6	6.26	28671.9
6.28	24852.1	6.28	18241.2	6.28	30808.2
6.3	26153.8	6.3	19433.3	6.3	33650.7
6.32	24254.4	6.32	18262.4	6.32	34177.8
6.34	25958.4	6.34	17481.7	6.34	37037.6
6.36	25651.2	6.36	18508.2	6.36	36182.4
6.38	24752.7	6.38	18275.3	6.38	34451.4
6.4	25155.5	6.4	17010	6.4	29473.2
6.42	24744.1	6.42	17438.6	6.42	24772.7
6.44	24557.6	6.44	18295.3	6.44	23719
6.46	25249.4	6.46	17995	6.46	23109.4
6.48	25208.3	6.48	18300.7	6.48	21678.7
6.5	24551.8	6.5	17573.4	6.5	20577.1
6.52	25652.1	6.52	18635	6.52	20602.6
6.54	25361.8	6.54	18415.4	6.54	21109.9
6.56	23521.8	6.56	17352.6	6.56	19456.1
6.58	24916.6	6.58	17604.9	6.58	21330.7
6.6	25393.8	6.6	17696.2	6.6	20020.6
6.62	24492.8	6.62	18073.8	6.62	19614.7
6.64	26125.2	6.64	19442.6	6.64	19526.6
6.66	25572.3	6.66	19623	6.66	20226.9
6.68	25709.7	6.68	18787.7	6.68	20533.9
6.7	25569.9	6.7	18425.5	6.7	18954.3
6.72	26050.1	6.72	18854.9	6.72	20970.1
6.74	25055.6	6.74	19345	6.74	21430
6.76	24730.4	6.76	19153.1	6.76	21031.2
6.78	25564.5	6.78	19755.6	6.78	20146.1
6.8	24250.9	6.8	17714.2	6.8	20570.2
6.82	24690.9	6.82	19843.3	6.82	19885.2
6.84	25646	6.84	17468.1	6.84	19968.9
6.86	25833.2	6.86	16796.8	6.86	19198.6
6.88	24086.6	6.88	18184.2	6.88	20129.5
6.9	24898.9	6.9	17511.8	6.9	21248.1
6.92	24763	6.92	16230.7	6.92	20416.9
6.94	25011.3	6.94	18092.7	6.94	20468.6
6.96	24334.9	6.96	15842.3	6.96	20324
6.98	24432.1	6.98	17253.4	6.98	19963.8
7	24771	7	15309.3	7	20215.6
7.02	24817.1	7.02	17199.7	7.02	20142.7
7.04	24186.7	7.04	16237.5	7.04	21286.6
7.06	24928.9	7.06	16035.5	7.06	19758.2
7.08	24934.8	7.08	16723.8	7.08	21648.5
7.1	24831.3	7.1	15595.7	7.1	19878.4
7.12	25294.6	7.12	16170.1	7.12	19375.5
7.14	25622	7.14	16809.4	7.14	21501.9
7.16	24945.1	7.16	16894.4	7.16	20321.7
7.18	25230.2	7.18	16551.5	7.18	20185.9
7.2	24940.3	7.2	16432.1	7.2	19904.9
7.22	25059.6	7.22	15759.1	7.22	19869.2
7.24	25320.5	7.24	16841.5	7.24	19540.6
7.26	24858	7.26	16785.4	7.26	19581.2
7.28	25337.7	7.28	15386.4	7.28	21010.6
7.3	25251	7.3	15413.5	7.3	21357.8
7.32	25298.3	7.32	16182.7	7.32	20127.8
7.34	24534.3	7.34	16360.6	7.34	19911.3
7.36	24927.9	7.36	14433.8	7.36	19974
7.38	25791.5	7.38	14915	7.38	20235.8
7.4	25509.1	7.4	16319.4	7.4	19242.8
7.42	25959.1	7.42	15313.4	7.42	19743.8
7.44	24693.9	7.44	15498.3	7.44	19098.2
7.46	25367.9	7.46	15397.2	7.46	19806.7
7.48	25511.1	7.48	16368.7	7.48	20138.9
7.5	24740.8	7.5	16183.2	7.5	20549.5
7.52	24921.9	7.52	15825.8	7.52	21171.4
7.54	25326.2	7.54	15692.8	7.54	20182.5
7.56	25904.5	7.56	16593.1	7.56	19598
7.58	25919.6	7.58	16022.2	7.58	20618.2
7.6	24522.7	7.6	16209.5	7.6	21618
7.62	25527.8	7.62	14821.8	7.62	19922.8
7.64	25516	7.64	16325	7.64	19847.4
7.66	24569.6	7.66	15287.8	7.66	21263.9
7.68	26012.5	7.68	15120.4	7.68	20500.9
7.7	25737.2	7.7	15084.7	7.7	20941.9
7.72	25446.7	7.72	15707.5	7.72	21504.3
7.74	26007.3	7.74	14649.6	7.74	20295.3
7.76	26080.9	7.76	15083	7.76	20544.8
7.78	24616.7	7.78	15964.6	7.78	21148.2
7.8	27013	7.8	15957.3	7.8	21977.4
7.82	25219.5	7.82	16431.8	7.82	21802.6
7.84	25286.3	7.84	15642.1	7.84	22621.1
7.86	26431.1	7.86	14914.9	7.86	23093.6
7.88	24908.9	7.88	16284.9	7.88	23879.6
7.9	26359.1	7.9	15218.6	7.9	25252.1
7.92	26348.2	7.92	15343.8	7.92	27045.7
7.94	26049.5	7.94	14776.1	7.94	28900.5
7.96	24479.1	7.96	14432	7.96	32173.8
7.98	26118.2	7.98	17214.1	7.98	34981.6
8	26228.6	8	16514.3	8	38646.6
8.02	26140.3	8.02	16118.2	8.02	42891
8.04	26001.3	8.04	15673.4	8.04	44328.4
8.06	25899.6	8.06	15179.1	8.06	44529.8
8.08	25953.8	8.08	17039.2	8.08	41657.9
8.1	26653.3	8.1	16652.7	8.1	36754.1
8.12	26074.9	8.12	15408.4	8.12	33140.3
8.14	25853.7	8.14	16731.8	8.14	31205.9
8.16	25682.2	8.16	16382.1	8.16	29547.9
8.18	25932.3	8.18	17360.1	8.18	28533.2
8.2	24111.2	8.2	15456.9	8.2	27133.3
8.22	27000.7	8.22	17455.2	8.22	26250.6
8.24	26448.6	8.24	16236.5	8.24	26063.1
8.26	25718.1	8.26	16653.3	8.26	26193.7
8.28	26192.2	8.28	17021.9	8.28	25587.7
8.3	27869.4	8.3	19213	8.3	25229.6
8.32	24482	8.32	16764	8.32	24486.7
8.34	26069.5	8.34	17426.5	8.34	25331.7
8.36	26001.3	8.36	16596.3	8.36	25150.9
8.38	26883.3	8.38	18079.3	8.38	24413.9
8.4	25860.3	8.4	17475.3	8.4	25284.2
8.42	26128.9	8.42	18663.2	8.42	25029
8.44	26245.9	8.44	19150.4	8.44	24713.9
8.46	27458.5	8.46	18131.3	8.46	25060.5
8.48	28353.3	8.48	18325.1	8.48	25475
8.5	26762.1	8.5	18093	8.5	26661.9
8.52	27039.1	8.52	18961	8.52	26412.8
8.54	26797.2	8.54	19786	8.54	25946.4
8.56	26938.1	8.56	19210	8.56	26385.3
8.58	27764.8	8.58	20856.2	8.58	26108.1
8.6	27673.6	8.6	19754.2	8.6	27831.6
8.62	26705.4	8.62	20526.7	8.62	29180.4
8.64	27587.8	8.64	21592.2	8.64	28874.9
8.66	28755.4	8.66	21874.1	8.66	29476.7
8.68	27563.9	8.68	23595.6	8.68	30544.8
8.7	27334.1	8.7	23006.5	8.7	33447.3
8.72	27893.7	8.72	23098.4	8.72	36103.3
8.74	27973	8.74	24138	8.74	39827.5
8.76	28226.1	8.76	24411.1	8.76	43371.9
8.78	29292.5	8.78	26170.2	8.78	51040.4
8.8	29079	8.8	25433.6	8.8	63011.1
8.82	27830.1	8.82	26597.6	8.82	71044.1
8.84	29672.6	8.84	27323.6	8.84	88617
8.86	29332.8	8.86	29110.7	8.86	110592
8.88	29056.8	8.88	31594.4	8.88	133482
8.9	29529.6	8.9	29761.2	8.9	164514
8.92	29134.2	8.92	33658.1	8.92	190434
8.94	29690.7	8.94	31692.3	8.94	217784
8.96	29351.3	8.96	33219	8.96	239156
8.98	30002.2	8.98	35439	8.98	238801
9	30126	9	35892.6	9	216039
9.02	29372.4	9.02	36525.6	9.02	178439
9.04	29184.1	9.04	39039.6	9.04	134063
9.06	30824	9.06	42388.8	9.06	92681.3
9.08	30359.1	9.08	43155.6	9.08	62982.8
9.1	30398.9	9.1	46514.9	9.1	47142.8
9.12	30426.3	9.12	49257.5	9.12	39054.5
9.14	30794.4	9.14	54145.7	9.14	32961.9
9.16	29697.6	9.16	54988.5	9.16	29857.7
9.18	30512.4	9.18	56183.7	9.18	27070
9.2	30520.2	9.2	60961.1	9.2	26891.3
9.22	30561.2	9.22	64712	9.22	24178.5
9.24	29757.5	9.24	73749.3	9.24	24184.8
9.26	31018.4	9.26	77921.1	9.26	24277.2
9.28	30411.6	9.28	85310.7	9.28	23559.5
9.3	30923.3	9.3	91388.8	9.3	23695.2
9.32	31313.1	9.32	99833.2	9.32	22123.9
9.34	31283.3	9.34	108978	9.34	22690.3
9.36	31456.1	9.36	117950	9.36	21715.2
9.38	32158.1	9.38	135310	9.38	21195.8
9.4	31853.4	9.4	149533	9.4	21635.1
9.42	31628.4	9.42	167926	9.42	21518.4
9.44	31419.3	9.44	188377	9.44	21687.6
9.46	32377.8	9.46	206402	9.46	21098.4
9.48	31643.5	9.48	231357	9.48	22409.8
9.5	32070.7	9.5	250792	9.5	20387.7
9.52	32177.7	9.52	264075	9.52	22175.2
9.54	32799.3	9.54	279281	9.54	21542.7
9.56	32861.3	9.56	283472	9.56	22066.3
9.58	32617.6	9.58	270983	9.58	21557.4
9.6	32301.1	9.6	253356	9.6	20896.3
9.62	33269.2	9.62	227704	9.62	21456.3
9.64	33743.6	9.64	188746	9.64	21766.5
9.66	33223.8	9.66	153825	9.66	20498.3
9.68	34459.6	9.68	119139	9.68	20259.1
9.7	35353.3	9.7	93092.4	9.7	21045.9
9.72	35022.7	9.72	75470.2	9.72	20051.1
9.74	35322.7	9.74	58005.4	9.74	21040.5
9.76	34628	9.76	49267.2	9.76	20208.5
9.78	35540.9	9.78	42560.4	9.78	20318.5
9.8	36386.1	9.8	38465.6	9.8	21119.7
9.82	35813.3	9.82	34286.2	9.82	22019.7
9.84	35716.4	9.84	31148.4	9.84	21614.7
9.86	36942.4	9.86	28386.8	9.86	21959.9
9.88	37204.9	9.88	27596	9.88	21294.6
9.9	36926.8	9.9	27430.5	9.9	21741
9.92	38030.2	9.92	24621	9.92	21849.9
9.94	37595.4	9.94	24070.6	9.94	21823.6
9.96	38647.1	9.96	22169.7	9.96	22072.1
9.98	38442.1	9.98	22462.7	9.98	20623.6
10	39625.3	10	21555.8	10	21844.8
10.02	40550.5	10.02	21207.8	10.02	20313.6
10.04	41179.9	10.04	19555.9	10.04	21346.9
10.06	42957.2	10.06	20101.1	10.06	22886.6
10.08	43110.9	10.08	20479.2	10.08	22416.8
10.1	42580.9	10.1	19907.5	10.1	21279.5
10.12	43158.9	10.12	19288.4	10.12	20616
10.14	44577.7	10.14	17251.6	10.14	21037.1
10.16	47213.8	10.16	18984	10.16	21426.4
10.18	47418.2	10.18	18787.7	10.18	22428.5
10.2	48227.9	10.2	18796.1	10.2	21482.8
10.22	50131	10.22	18302.6	10.22	21162.7
10.24	50431.8	10.24	19360.6	10.24	22897.5
10.26	52486.7	10.26	18521.7	10.26	20881
10.28	53216.7	10.28	17591.8	10.28	22484.3
10.3	56580.3	10.3	17551.7	10.3	21586.3
10.32	58140	10.32	17510.4	10.32	20427.5
10.34	59925.6	10.34	17642.6	10.34	23039.6
10.36	65060.2	10.36	16857.9	10.36	21936.2
10.38	67217.2	10.38	17696	10.38	22506.9
10.4	70985.1	10.4	16941.6	10.4	22782.7
10.42	75129.3	10.42	18736.1	10.42	22231.7
10.44	77299.2	10.44	18537.6	10.44	23987
10.46	82919.2	10.46	16746	10.46	21986.8
10.48	89511.3	10.48	18325.6	10.48	22901.1
10.5	96525	10.5	18194.5	10.5	22418.6
10.52	103248	10.52	17818.6	10.52	23126.2
10.54	113052	10.54	17781.7	10.54	21732.7
10.56	121035	10.56	17584.1	10.56	23676.9
10.58	132562	10.58	18169.4	10.58	23107.3
10.6	145673	10.6	18186.4	10.6	23077.4
10.62	160648	10.62	17026.8	10.62	23828.5
10.64	180209	10.64	17352.6	10.64	22380.1
10.66	197633	10.66	18265	10.66	23948.4
10.68	218755	10.68	18503.4	10.68	24168.7
10.7	242009	10.7	18724.5	10.7	21658.2
10.72	269332	10.72	19461.1	10.72	24627.1
10.74	289770	10.74	17884.2	10.74	21668.3
10.76	321094	10.76	19612.6	10.76	21990.1
10.78	341978	10.78	18525.6	10.78	24078.2
10.8	364754	10.8	19186.8	10.8	22869.5
10.82	381125	10.82	18713.4	10.82	23496
10.84	396573	10.84	18457.7	10.84	24118.3
10.86	398626	10.86	19632.2	10.86	24136
10.88	397122	10.88	20218.4	10.88	24706.6
10.9	391689	10.9	20303.4	10.9	24488.4
10.92	379031	10.92	22223.2	10.92	23404.7
10.94	357955	10.94	22254.6	10.94	23229.3
10.96	329800	10.96	22334.2	10.96	23296.5
10.98	300650	10.98	22994.9	10.98	24439.6
11	268872	11	23785.8	11	23934.4
11.02	244915	11.02	26590.9	11.02	24419.2
11.04	214738	11.04	27503.6	11.04	23266
11.06	190225	11.06	30213.5	11.06	25348.1
11.08	171917	11.08	33994.2	11.08	24480.3
11.1	157853	11.1	35574.8	11.1	24211.3
11.12	145228	11.12	38528.3	11.12	24923.9
11.14	129322	11.14	43293.3	11.14	23829.3
11.16	114307	11.16	49055.3	11.16	25059.9
11.18	99018.1	11.18	51463.2	11.18	25530.1
11.2	83254	11.2	55326.2	11.2	25082.2
11.22	74756.2	11.22	62738.8	11.22	26963.9
11.24	67458.4	11.24	62763.8	11.24	25294.5
11.26	60347.1	11.26	62593.9	11.26	25133.2
11.28	56120	11.28	59492.8	11.28	26686.6
11.3	55517.7	11.3	55852.8	11.3	26294.3
11.32	51305.9	11.32	50992.5	11.32	27837.9
11.34	49583.9	11.34	44143.4	11.34	30087.1
11.36	46252.9	11.36	36529.5	11.36	29958.2
11.38	45536.9	11.38	36188.2	11.38	32089.3
11.4	44313.4	11.4	32938.7	11.4	34616.6
11.42	44715.9	11.42	29686.2	11.42	37297
11.44	42815.6	11.44	27338.7	11.44	39117.5
11.46	41702.1	11.46	25790.7	11.46	42744
11.48	42668.4	11.48	26732.3	11.48	44425.2
11.5	41168.5	11.5	24169.3	11.5	45725.8
11.52	38675.9	11.52	26615.1	11.52	43475.6
11.54	40109.7	11.54	23691.6	11.54	39410.8
11.56	38324.7	11.56	23642	11.56	35590.6
11.58	39905	11.58	24171.5	11.58	31246.4
11.6	38257.6	11.6	24446	11.6	31406.9
11.62	38005.3	11.62	22782	11.62	29778.7
11.64	37983.7	11.64	23246.3	11.64	28488.9
11.66	37805	11.66	22609.6	11.66	27827.8
11.68	37529.8	11.68	22531.8	11.68	28236.9
11.7	37537.9	11.7	22816	11.7	28415.4
11.72	37937.9	11.72	22344.4	11.72	27809.8
11.74	38052.4	11.74	22663.8	11.74	28023.3
11.76	35178.8	11.76	22852.3	11.76	27929
11.78	36015.9	11.78	22107.8	11.78	29227.7
11.8	35776.3	11.8	22342	11.8	28728.3
11.82	35874.1	11.82	22290.7	11.82	28497.3
11.84	36866.5	11.84	23289.9	11.84	27548
11.86	36757.9	11.86	23398.2	11.86	28627.8
11.88	37248.6	11.88	21954.4	11.88	27832.4
11.9	36042	11.9	21895.8	11.9	27346.8
11.92	36185.8	11.92	22431	11.92	27425.9
11.94	36098.8	11.94	22236.1	11.94	27805.1
11.96	35757.2	11.96	21835.8	11.96	28436.7
11.98	35619.4	11.98	21739.4	11.98	28731.9
12	37126.7	12	21682.9	12	29303.4
12.02	35325.5	12.02	22122.1	12.02	29608.1
12.04	36608.3	12.04	21912.7	12.04	28550.4
12.06	35485.3	12.06	21242.6	12.06	28491.8
12.08	35964.8	12.08	22615.2	12.08	28242.2
12.1	35664.4	12.1	22783.2	12.1	27924.6
12.12	34352.2	12.12	21269.2	12.12	28294.4
12.14	35356.2	12.14	21445.1	12.14	28186.7
12.16	35964.9	12.16	23009.2	12.16	28532.9
12.18	35440	12.18	22825.8	12.18	29137.9
12.2	34262.1	12.2	22906.7	12.2	28502.1
12.22	35314.8	12.22	23689.8	12.22	29124.9
12.24	35658.6	12.24	22071.6	12.24	28115.7
12.26	36283.3	12.26	22358.1	12.26	29848.3
12.28	35963.6	12.28	22234.1	12.28	29715.5
12.3	35276	12.3	22180.6	12.3	31631.9
12.32	35902.3	12.32	21634	12.32	28648.2
12.34	36829	12.34	23542.4	12.34	28990.2
12.36	35758.6	12.36	22075.9	12.36	30121.4
12.38	36853.5	12.38	23311.2	12.38	29578.5
12.4	35717.8	12.4	24052.8	12.4	31118.8
12.42	35364.5	12.42	24151.2	12.42	31076.4
12.44	37564.4	12.44	24675.8	12.44	31537.7
12.46	35800.7	12.46	23607.6	12.46	30640.5
12.48	35766.5	12.48	23240	12.48	31927.1
12.5	35470.1	12.5	23384.1	12.5	32984.3
12.52	35508.2	12.52	24200.8	12.52	33783.4
12.54	36096.8	12.54	24512.5	12.54	34980
12.56	36954.9	12.56	23993.6	12.56	34002.4
12.58	36927.3	12.58	23861.5	12.58	35276.7
12.6	35966.2	12.6	24131.2	12.6	37955.4
12.62	35370.5	12.62	25150	12.62	41257.7
12.64	36370.6	12.64	24260	12.64	41310.3
12.66	37500.8	12.66	24835.1	12.66	42603.6
12.68	37440.8	12.68	25212.5	12.68	44788.5
12.7	36817.2	12.7	25540.2	12.7	45803.4
12.72	37773.6	12.72	24270.3	12.72	43044.2
12.74	36296.7	12.74	25222.2	12.74	43157.4
12.76	36546.5	12.76	24934.5	12.76	41865.9
12.78	36811.1	12.78	26064.2	12.78	39957.2
12.8	36726.9	12.8	26083.2	12.8	37562.6
12.82	36912.6	12.82	26719.2	12.82	35648.3
12.84	37682.4	12.84	24783.5	12.84	35658.7
12.86	36011.1	12.86	25452.1	12.86	32971.1
12.88	36730.4	12.88	25793.1	12.88	33862.1
12.9	38214.8	12.9	26794.2	12.9	34293
12.92	37850.9	12.92	27109.4	12.92	33042.6
12.94	37406.4	12.94	25179.2	12.94	32281.8
12.96	37967.8	12.96	27132.1	12.96	34015.6
12.98	37237.8	12.98	26259.1	12.98	33348.4
13	38065	13	25971.5	13	33222.2
13.02	38378.1	13.02	25468.5	13.02	32245
13.04	37374.7	13.04	27382.2	13.04	33266.3
13.06	37870	13.06	26886.5	13.06	34476.4
13.08	38073.7	13.08	26408.9	13.08	33385.9
13.1	37270.5	13.1	25707.4	13.1	33539.2
13.12	37271.9	13.12	27931.2	13.12	35349.7
13.14	37175.4	13.14	27560.8	13.14	33884.5
13.16	39609.2	13.16	26219.3	13.16	34572.9
13.18	39368.4	13.18	27826.7	13.18	35029.7
13.2	37547.3	13.2	27785.7	13.2	34185.4
13.22	39666.2	13.22	27413.5	13.22	34874.7
13.24	37777.9	13.24	27920.1	13.24	33276.9
13.26	39094.3	13.26	27823.8	13.26	35964.4
13.28	38791.4	13.28	27559.7	13.28	35023.3
13.3	39100.1	13.3	28602.6	13.3	34223.1
13.32	38718.4	13.32	28354	13.32	35586.2
13.34	39311.5	13.34	27474.6	13.34	33383.6
13.36	38154	13.36	28458.8	13.36	35334.4
13.38	38776.2	13.38	30995	13.38	34967.5
13.4	39841.4	13.4	30495.1	13.4	36982.1
13.42	40234.5	13.42	29979.2	13.42	35550.9
13.44	40707.4	13.44	31749.5	13.44	36904.8
13.46	39854.6	13.46	32350.1	13.46	36057.9
13.48	40696.7	13.48	34541.9	13.48	37758.4
13.5	40592.3	13.5	35869.7	13.5	37850.2
13.52	41435	13.52	36145.9	13.52	38170.3
13.54	40365.2	13.54	36539.3	13.54	38051.9
13.56	39704.8	13.56	38835.8	13.56	36138.4
13.58	41202.1	13.58	36715.3	13.58	36234.4
13.6	40810.3	13.6	37778.5	13.6	36777.9
13.62	41566.9	13.62	38534.9	13.62	37690.7
13.64	39915.8	13.64	35559	13.64	37297.1
13.66	41380.6	13.66	35190.9	13.66	38897.6
13.68	41398.3	13.68	33327.9	13.68	39563.2
13.7	42274.6	13.7	33106.3	13.7	40198.6
13.72	40136.6	13.72	32473.3	13.72	39240.6
13.74	40807.1	13.74	33315.5	13.74	38172.8
13.76	41210.1	13.76	32236.2	13.76	38330.8
13.78	41172.1	13.78	31753.2	13.78	40696.5
13.8	40663.3	13.8	32169.1	13.8	39731.8
13.82	42564.9	13.82	33187.9	13.82	40704.4
13.84	41448.2	13.84	30806.2	13.84	41401.4
13.86	41999.1	13.86	31238.1	13.86	43669.7
13.88	41690.1	13.88	32857.9	13.88	42320.4
13.9	42344.8	13.9	32450.1	13.9	45829.5
13.92	41990.5	13.92	31697.2	13.92	45830.9
13.94	42229	13.94	30908.9	13.94	46992.8
13.96	42382	13.96	31925.5	13.96	46957.1
13.98	43329.3	13.98	31990.2	13.98	51914.7
14	41644.7	14	30642.7	14	55931.7
14.02	42807.9	14.02	32401.1	14.02	61683
14.04	43342.9	14.04	32124.5	14.04	68169.8
14.06	43974.5	14.06	32682	14.06	72180.7
14.08	43642.8	14.08	32757.4	14.08	81543.1
14.1	44447.9	14.1	34470.7	14.1	89031.7
14.12	45166.1	14.12	34271.3	14.12	100762
14.14	45210.4	14.14	34653.6	14.14	108780
14.16	43701.5	14.16	35181.9	14.16	121338
14.18	44243.9	14.18	34615.4	14.18	130815
14.2	44332.2	14.2	35461.7	14.2	135746
14.22	43968.4	14.22	34254.7	14.22	137710
14.24	45835.2	14.24	35073.4	14.24	133320
14.26	45448.4	14.26	36315.5	14.26	126470
14.28	45072.5	14.28	35711.4	14.28	112229
14.3	46695.6	14.3	36439.4	14.3	99211.9
14.32	45486.6	14.32	36446.9	14.32	86985.1
14.34	47147.1	14.34	38878.5	14.34	74635.8
14.36	45571.8	14.36	36160.7	14.36	71415.9
14.38	46482.6	14.38	39638	14.38	66275.7
14.4	47978.2	14.4	37976.2	14.4	64318.7
14.42	47599.3	14.42	39024.8	14.42	65844.3
14.44	45501.9	14.44	39602.7	14.44	69669.4
14.46	45527.4	14.46	41556.2	14.46	75945.1
14.48	47492.8	14.48	42946	14.48	83514
14.5	47899.9	14.5	42236.9	14.5	92558.9
14.52	46934.1	14.52	46046.5	14.52	101858
14.54	48295.8	14.54	45888.6	14.54	112915
14.56	47918.9	14.56	49518.8	14.56	123660
14.58	48674.9	14.58	54606.8	14.58	134509
14.6	49823.2	14.6	58680.8	14.6	143550
14.62	49397	14.62	66214.6	14.62	140388
14.64	48767.8	14.64	72798.6	14.64	128585
14.66	49828.2	14.66	79049.3	14.66	109799
14.68	49927.2	14.68	89974.1	14.68	92511
14.7	50097.2	14.7	97195.3	14.7	76395.9
14.72	51313.3	14.72	108388	14.72	67586.3
14.74	52701.1	14.74	116709	14.74	60859.6
14.76	53628.2	14.76	126354	14.76	56761.8
14.78	51234.2	14.78	131343	14.78	54981.8
14.8	53512.9	14.8	131802	14.8	52685
14.82	52145.3	14.82	132775	14.82	51386.6
14.84	53481.8	14.84	126979	14.84	50999.5
14.86	55438	14.86	110181	14.86	49683.4
14.88	55733.3	14.88	98247.4	14.88	51823.1
14.9	57491	14.9	85046.8	14.9	51996
14.92	57254.5	14.92	76899.3	14.92	52263.4
14.94	58678	14.94	72481.9	14.94	50647.3
14.96	59403.2	14.96	70968.1	14.96	53195
14.98	59932.8	14.98	71077.5	14.98	51169.3
15	61314.2	15	69827.6	15	50011.1
15.02	63018	15.02	73693.2	15.02	49130.7
15.04	64086.9	15.04	76695.7	15.04	50415.9
15.06	66421.4	15.06	84431.9	15.06	51469.6
15.08	67568.3	15.08	86829.5	15.08	50193.7
15.1	68845	15.1	94366.8	15.1	52399.3
15.12	71789.1	15.12	96637.2	15.12	53203.5
15.14	74762.2	15.14	98141.2	15.14	50016.8
15.16	74038.4	15.16	101939	15.16	50804.7
15.18	78521.6	15.18	100638	15.18	51312.2
15.2	83745.9	15.2	97613.6	15.2	50969.7
15.22	87852.6	15.22	93682.7	15.22	51678.1
15.24	93103.5	15.24	90379.1	15.24	49773.1
15.26	95683.9	15.26	81897.3	15.26	51357.4
15.28	102521	15.28	79144.1	15.28	51628.7
15.3	109818	15.3	68745.4	15.3	51490.7
15.32	116214	15.32	62860.3	15.32	52414.9
15.34	123241	15.34	59374.9	15.34	51012.3
15.36	136828	15.36	55274.4	15.36	53624
15.38	143795	15.38	52023.3	15.38	50759
15.4	155646	15.4	51136.5	15.4	51812.2
15.42	169013	15.42	50573.6	15.42	53639
15.44	182298	15.44	47514.4	15.44	52836
15.46	196765	15.46	47805.1	15.46	54046.8
15.48	208286	15.48	47634.5	15.48	54292.6
15.5	221336	15.5	46259.1	15.5	54826.8
15.52	232021	15.52	46278.3	15.52	54469
15.54	238103	15.54	45745.8	15.54	55895.3
15.56	243246	15.56	45021.6	15.56	56678.3
15.58	246751	15.58	44237.8	15.58	55706.2
15.6	237584	15.6	44916.4	15.6	55719.6
15.62	226574	15.62	47233	15.62	55208.2
15.64	218258	15.64	43600.7	15.64	55433.8
15.66	201527	15.66	44839	15.66	54571.4
15.68	180740	15.68	46019.5	15.68	56575.4
15.7	166004	15.7	44308.3	15.7	55962.1
15.72	153955	15.72	44366.1	15.72	55943
15.74	139308	15.74	43251.6	15.74	56076.5
15.76	126161	15.76	44678.8	15.76	58211.6
15.78	118058	15.78	42814	15.78	57639.8
15.8	108216	15.8	47048.7	15.8	58623.7
15.82	101025	15.82	44244.5	15.82	57304.2
15.84	98559.9	15.84	45426.3	15.84	59870.8
15.86	90716.7	15.86	46192.6	15.86	60185.1
15.88	89229.1	15.88	46738.7	15.88	57962.5
15.9	85011.7	15.9	45238.2	15.9	58520.5
15.92	79885.2	15.92	46275.7	15.92	62938.1
15.94	80806.1	15.94	47652.7	15.94	64080.9
15.96	78059.2	15.96	46040.8	15.96	62932.9
15.98	76157.1	15.98	45926.7	15.98	65323.7
16	75091.1	16	49028.2	16	66336.6
16.02	73759.6	16.02	47599	16.02	70433.6
16.04	72443.1	16.04	50089.3	16.04	71484.6
16.06	71535.3	16.06	48292.5	16.06	73588.6
16.08	70721.3	16.08	50372.6	16.08	75907.2
16.1	70747.8	16.1	49321.7	16.1	78174.7
16.12	70851.7	16.12	50961.7	16.12	78669.1
16.14	69162.9	16.14	53125.1	16.14	77458.3
16.16	70064.8	16.16	50094.7	16.16	79028.3
16.18	68929.8	16.18	52479.8	16.18	79458.7
16.2	69300.8	16.2	53217.2	16.2	77297.2
16.22	70666.7	16.22	53883.1	16.22	74184.6
16.24	68509.7	16.24	54295.7	16.24	74048.4
16.26	68955.3	16.26	56843.5	16.26	73301.2
16.28	69242.3	16.28	59072.7	16.28	70688.2
16.3	69324.8	16.3	59765.9	16.3	70583.3
16.32	70118.2	16.32	60564.5	16.32	70588.2
16.34	70655	16.34	63578.5	16.34	68521.7
16.36	71166.8	16.36	64672.2	16.36	69488.6
16.38	70749.6	16.38	69886.4	16.38	67302.3
16.4	72950.5	16.4	74309.4	16.4	69042.4
16.42	73050.7	16.42	80753.2	16.42	69326.1
16.44	71620.9	16.44	85379	16.44	70165.8
16.46	73281.5	16.46	87410.6	16.46	69466.8
16.48	74295.3	16.48	98334	16.48	70426.8
16.5	75980.4	16.5	103081	16.5	70604.2
16.52	75085.6	16.52	114899	16.52	72637.2
16.54	78932.7	16.54	117526	16.54	72432.3
16.56	79884.1	16.56	125285	16.56	71267.3
16.58	78198.6	16.58	129924	16.58	71878.3
16.6	80169.1	16.6	133807	16.6	73614.5
16.62	82026.4	16.62	140936	16.62	72296.8
16.64	83223.6	16.64	139485	16.64	74075.2
16.66	83917.5	16.66	142696	16.66	72626
16.68	83008.8	16.68	135004	16.68	73987.4
16.7	89043.9	16.7	131017	16.7	74089.6
16.72	90318.1	16.72	120195	16.72	75722.3
16.74	93937.4	16.74	111638	16.74	74858.8
16.76	95990.6	16.76	103263	16.76	76897.2
16.78	98152.7	16.78	95242.6	16.78	79028.7
16.8	102467	16.8	89870.8	16.8	78022.4
16.82	104107	16.82	83825.3	16.82	78626.7
16.84	108964	16.84	80722.4	16.84	79835
16.86	114240	16.86	76842.7	16.86	83635.9
16.88	120028	16.88	73657.2	16.88	86554.8
16.9	124812	16.9	71500.5	16.9	90949.3
16.92	129491	16.92	69536.7	16.92	93747.6
16.94	137730	16.94	69091.6	16.94	100072
16.96	143028	16.96	71678.9	16.96	109008
16.98	152122	16.98	73330.2	16.98	117651
17	160410	17	71602.4	17	130798
17.02	170635	17.02	71960	17.02	145517
17.04	177378	17.04	72158.6	17.04	163787
17.06	186164	17.06	71977.5	17.06	186205
17.08	194393	17.08	72665.5	17.08	204831
17.1	204788	17.1	74184.5	17.1	225086
17.12	214459	17.12	74372	17.12	246115
17.14	221999	17.14	77450.9	17.14	265930
17.16	227777	17.16	78514.2	17.16	276336
17.18	235339	17.18	79802.1	17.18	276429
17.2	237946	17.2	81161.5	17.2	263717
17.22	241112	17.22	84738.1	17.22	235896
17.24	243218	17.24	87351.1	17.24	205734
17.26	248656	17.26	92375.5	17.26	174801
17.28	242631	17.28	93051.4	17.28	145898
17.3	241796	17.3	100641	17.3	124314
17.32	240417	17.32	104099	17.32	113919
17.34	233841	17.34	111953	17.34	106687
17.36	225535	17.36	119073	17.36	100058
17.38	216219	17.38	128476	17.38	96411.3
17.4	209840	17.4	140842	17.4	93980.3
17.42	200429	17.42	151276	17.42	95216.2
17.44	190667	17.44	172172	17.44	90859.1
17.46	182157	17.46	193848	17.46	91016.6
17.48	173884	17.48	212864	17.48	90116
17.5	166042	17.5	238793	17.5	91191.5
17.52	155584	17.52	260032	17.52	90910.7
17.54	147552	17.54	290171	17.54	91444.1
17.56	141439	17.56	314919	17.56	91980.7
17.58	133969	17.58	341440	17.58	92493.2
17.6	130822	17.6	358120	17.6	91284.4
17.62	123779	17.62	371134	17.62	92158.3
17.64	120166	17.64	383173	17.64	95654.3
17.66	116350	17.66	386549	17.66	95235.8
17.68	113439	17.68	376222	17.68	98370.2
17.7	111515	17.7	353581	17.7	102487
17.72	109066	17.72	320449	17.72	103821
17.74	106292	17.74	287380	17.74	105094
17.76	104078	17.76	248120	17.76	110699
17.78	100530	17.78	212102	17.78	118190
17.8	100529	17.8	183974	17.8	122889
17.82	99364.1	17.82	157825	17.82	130928
17.84	99810.7	17.84	140474	17.84	141523
17.86	98291.4	17.86	128030	17.86	154668
17.88	98460.9	17.88	119126	17.88	165805
17.9	97315.9	17.9	111537	17.9	177815
17.92	95202.7	17.92	105925	17.92	192678
17.94	95545.8	17.94	97859.9	17.94	210870
17.96	94802.2	17.96	96971.4	17.96	225155
17.98	93533.6	17.98	94013.7	17.98	235442
18	95126.6	18	89924.9	18	246246
18.02	93115.8	18.02	89569.6	18.02	241596
18.04	93558.7	18.04	91153.3	18.04	238768
18.06	93148.4	18.06	85709	18.06	228751
18.08	92870.1	18.08	83663.7	18.08	208931
18.1	94471.3	18.1	88284.4	18.1	186933
18.12	95424.4	18.12	86040.4	18.12	168729
18.14	94678.8	18.14	83754.9	18.14	150904
18.16	94467.7	18.16	82300.1	18.16	134678
18.18	95978.9	18.18	83546.1	18.18	128131
18.2	95663.3	18.2	83443.5	18.2	115362
18.22	96416.4	18.22	82596.3	18.22	112691
18.24	96455.5	18.24	81338.6	18.24	109170
18.26	96012.6	18.26	83775.4	18.26	106154
18.28	98100.5	18.28	83749.7	18.28	103066
18.3	98945.9	18.3	82608.1	18.3	103216
18.32	99258.6	18.32	82883.9	18.32	103616
18.34	99639	18.34	86040.2	18.34	101329
18.36	103602	18.36	83877.1	18.36	102557
18.38	102786	18.38	85125.9	18.38	102067
18.4	104430	18.4	86151.2	18.4	102373
18.42	104522	18.42	81795.7	18.42	102968
18.44	109294	18.44	82363.6	18.44	102578
18.46	110543	18.46	88882.3	18.46	103846
18.48	112153	18.48	84542.6	18.48	102956
18.5	118252	18.5	84503.5	18.5	104024
18.52	120283	18.52	85652.7	18.52	104007
18.54	122105	18.54	84701.6	18.54	104721
18.56	125430	18.56	86662.9	18.56	106718
18.58	127798	18.58	89021.9	18.58	105128
18.6	133436	18.6	86527.1	18.6	108725
18.62	136086	18.62	86231.6	18.62	108451
18.64	143813	18.64	90351.2	18.64	112743
18.66	151187	18.66	89919	18.66	119299
18.68	156748	18.68	91729.5	18.68	117539
18.7	164062	18.7	91230.2	18.7	122462
18.72	175515	18.72	90690.2	18.72	125106
18.74	185793	18.74	91532.3	18.74	129586
18.76	198517	18.76	92242.9	18.76	135201
18.78	214486	18.78	95244.7	18.78	141042
18.8	229002	18.8	92398.6	18.8	150027
18.82	251440	18.82	96877.8	18.82	155300
18.84	273632	18.84	95101.8	18.84	160125
18.86	293907	18.86	99974.4	18.86	172209
18.88	318798	18.88	100134	18.88	173955
18.9	348384	18.9	101770	18.9	182848
18.92	372808	18.92	103016	18.92	187386
18.94	400391	18.94	106651	18.94	184811
18.96	425393	18.96	109094	18.96	185138
18.98	441661	18.98	113007	18.98	185295
19	468722	19	114711	19	184026
19.02	483909	19.02	117113	19.02	184489
19.04	489367	19.04	120084	19.04	188822
19.06	496446	19.06	124553	19.06	195024
19.08	500393	19.08	127390	19.08	202047
19.1	483833	19.1	131791	19.1	216263
19.12	466895	19.12	136789	19.12	230654
19.14	450559	19.14	138696	19.14	245762
19.16	424843	19.16	142739	19.16	272906
19.18	391429	19.18	145236	19.18	300159
19.2	360543	19.2	145225	19.2	349499
19.22	332534	19.22	148756	19.22	404851
19.24	296424	19.24	143188	19.24	484188
19.26	274096	19.26	145886	19.26	572761
19.28	245152	19.28	144567	19.28	687151
19.3	231048	19.3	139137	19.3	797514
19.32	210191	19.32	141438	19.32	943279
19.34	194701	19.34	137117	19.34	1.07287e+06
19.36	182988	19.36	132648	19.36	1.21359e+06
19.38	175178	19.38	129449	19.38	1.33445e+06
19.4	167857	19.4	129652	19.4	1.4036e+06
19.42	158522	19.42	128347	19.42	1.41599e+06
19.44	154668	19.44	124984	19.44	1.34326e+06
19.46	148757	19.46	125995	19.46	1.20104e+06
19.48	143909	19.48	128093	19.48	1.00079e+06
19.5	138558	19.5	133221	19.5	802611
19.52	134767	19.52	132469	19.52	621732
19.54	129918	19.54	134414	19.54	474936
19.56	124786	19.56	142483	19.56	374817
19.58	125285	19.58	146477	19.58	310334
19.6	119305	19.6	149892	19.6	259418
19.62	115624	19.62	155336	19.62	224386
19.64	114654	19.64	164476	19.64	199833
19.66	112456	19.66	168841	19.66	183486
19.68	108624	19.68	180636	19.68	169549
19.7	105854	19.7	191135	19.7	163057
19.72	106818	19.72	204930	19.72	152114
19.74	104662	19.74	217687	19.74	145543
19.76	103644	19.76	230109	19.76	140166
19.78	102510	19.78	247132	19.78	138619
19.8	100914	19.8	266111	19.8	135391
19.82	99509.7	19.82	290231	19.82	133692
19.84	99516.4	19.84	314677	19.84	129321
19.86	100110	19.86	350054	19.86	129754
19.88	98212.6	19.88	375506	19.88	127243
19.9	97498.1	19.9	419877	19.9	126660
19.92	96884.5	19.92	463336	19.92	129306
19.94	94063.7	19.94	516620	19.94	128799
19.96	93144.6	19.96	565804	19.96	128025
19.98	97244.4	19.98	616740	19.98	131310
20	95352.2	20	672871	20	132011
20.02	94752.2	20.02	729834	20.02	133921
20.04	94292.5	20.04	773179	20.04	138126
20.06	95441.8	20.06	818224	20.06	141017
20.08	94685.3	20.08	847053	20.08	144335
20.1	93304.3	20.1	860693	20.1	149524
20.12	92026.2	20.12	870314	20.12	149659
20.14	91878.3	20.14	840502	20.14	149520
20.16	92873.4	20.16	808718	20.16	151941
20.18	91979.9	20.18	763505	20.18	149518
20.2	90935.2	20.2	690422	20.2	148546
20.22	91080.9	20.22	618089	20.22	142601
20.24	92110.8	20.24	532544	20.24	137921
20.26	90544.3	20.26	464902	20.26	134560
20.28	90420.4	20.28	396144	20.28	127760
20.3	92734.8	20.3	345983	20.3	125133
20.32	92036.2	20.32	305558	20.32	123510
20.34	92524.5	20.34	268124	20.34	118946
20.36	90012.4	20.36	249305	20.36	117425
20.38	91248.7	20.38	231256	20.38	114656
20.4	91259.8	20.4	213012	20.4	113102
20.42	91933	20.42	201372	20.42	114970
20.44	92573.8	20.44	191760	20.44	115450
20.46	92327.9	20.46	182311	20.46	115012
20.48	92003.2	20.48	169113	20.48	117291
20.5	91979	20.5	158957	20.5	118117
20.52	91688.7	20.52	149116	20.52	116120
20.54	92136.5	20.54	137504	20.54	117493
20.56	92769.1	20.56	129467	20.56	117312
20.58	91109.5	20.58	123746	20.58	118499
20.6	91198.5	20.6	117838	20.6	121180
20.62	91123.4	20.62	111524	20.62	115768
20.64	93523.4	20.64	108960	20.64	113161
20.66	94613.8	20.66	103562	20.66	115215
20.68	94374.7	20.68	101631	20.68	112390
20.7	96036.2	20.7	98684.6	20.7	111480
20.72	96613	20.72	97476.6	20.72	111325
20.74	97218.2	20.74	96695.8	20.74	109217
20.76	98370.9	20.76	93694.2	20.76	108184
20.78	98167.8	20.78	94111.3	20.78	108868
20.8	102653	20.8	90821.9	20.8	108423
20.82	104842	20.82	89922.6	20.82	107011
20.84	106543	20.84	91396.7	20.84	105739
20.86	109032	20.86	89829.9	20.86	105971
20.88	112672	20.88	89226.1	20.88	105992
20.9	111039	20.9	84096.6	20.9	107677
20.92	112373	20.92	87912.1	20.92	107840
20.94	115759	20.94	86907.3	20.94	109522
20.96	115043	20.96	87282	20.96	107080
20.98	114899	20.98	85213.2	20.98	106438
21	115386	21	85212.2	21	107710
21.02	116008	21.02	86249.9	21.02	107133
21.04	114394	21.04	86688.9	21.04	106477
21.06	111792	21.06	84798.8	21.06	109078
21.08	113413	21.08	85209.1	21.08	110801
21.1	113777	21.1	85967.3	21.1	110947
21.12	112126	21.12	85927.4	21.12	116000
21.14	112631	21.14	85815.2	21.14	120848
21.16	113162	21.16	87701.3	21.16	124307
21.18	113144	21.18	87680.1	21.18	130495
21.2	113312	21.2	90324.3	21.2	135997
21.22	116074	21.22	93789.8	21.22	145467
21.24	115707	21.24	95195.3	21.24	154829
21.26	119575	21.26	97059	21.26	171730
21.28	121508	21.28	97738.9	21.28	190063
21.3	122631	21.3	102404	21.3	208935
21.32	123408	21.32	105390	21.32	228978
21.34	124677	21.34	111470	21.34	249814
21.36	128012	21.36	116162	21.36	265634
21.38	133064	21.38	123054	21.38	283600
21.4	135216	21.4	125130	21.4	298225
21.42	137264	21.42	132537	21.42	311426
21.44	138987	21.44	137513	21.44	309785
21.46	143773	21.46	140056	21.46	297639
21.48	147211	21.48	146364	21.48	278156
21.5	151774	21.5	144325	21.5	254972
21.52	154364	21.52	149533	21.52	225972
21.54	160130	21.54	147983	21.54	197882
21.56	168861	21.56	148067	21.56	175282
21.58	173911	21.58	142941	21.58	157148
21.6	177207	21.6	140879	21.6	142000
21.62	183603	21.62	136174	21.62	134014
21.64	194495	21.64	127651	21.64	125522
21.66	199056	21.66	123357	21.66	117626
21.68	207672	21.68	116667	21.68	113610
21.7	218368	21.7	109222	21.7	112573
21.72	226173	21.72	104160	21.72	108182
21.74	238941	21.74	99718.1	21.74	105063
21.76	250317	21.76	96120.6	21.76	106243
21.78	258815	21.78	90894.4	21.78	102732
21.8	270237	21.8	89442.2	21.8	102618
21.82	279448	21.82	88377.1	21.82	104754
21.84	292315	21.84	87470.2	21.84	100900
21.86	300657	21.86	86324.4	21.86	101401
21.88	309541	21.88	86274.1	21.88	100312
21.9	319420	21.9	87080.9	21.9	96934.9
21.92	328836	21.92	87512.3	21.92	98512.6
21.94	329792	21.94	86689.1	21.94	98268.1
21.96	333422	21.96	86528.9	21.96	99521.2
21.98	337894	21.98	88837.4	21.98	99405
22	334712	22	91664.1	22	101759
22.02	333315	22.02	93757.9	22.02	95585.1
22.04	327383	22.04	95723.6	22.04	99188.3
22.06	320936	22.06	97178.5	22.06	103261
22.08	311098	22.08	102658	22.08	104007
22.1	303247	22.1	107606	22.1	104417
22.12	289696	22.12	110574	22.12	105379
22.14	278025	22.14	112574	22.14	105739
22.16	266462	22.16	115911	22.16	108376
22.18	257251	22.18	126550	22.18	111800
22.2	245876	22.2	129908	22.2	110339
22.22	234322	22.22	134949	22.22	108645
22.24	219968	22.24	140918	22.24	107716
22.26	211814	22.26	147731	22.26	108017
22.28	199623	22.28	149488	22.28	103298
22.3	192860	22.3	156814	22.3	101215
22.32	184013	22.32	158201	22.32	98930.3
22.34	175980	22.34	156223	22.34	98623
22.36	169924	22.36	159126	22.36	94133.5
22.38	161740	22.38	154665	22.38	95054.4
22.4	157190	22.4	154164	22.4	96429.7
22.42	151650	22.42	149916	22.42	94819.9
22.44	144678	22.44	143154	22.44	93630.3
22.46	139735	22.46	140504	22.46	91215.9
22.48	133297	22.48	134150	22.48	90294.7
22.5	131713	22.5	132720	22.5	91088
22.52	127145	22.52	125654	22.52	91356.5
22.54	124005	22.54	122945	22.54	89908.4
22.56	120354	22.56	120359	22.56	91283.3
22.58	116024	22.58	119785	22.58	90561.1
22.6	114707	22.6	115744	22.6	92736.3
22.62	110835	22.62	112737	22.62	90949.6
22.64	110363	22.64	108887	22.64	91493.2
22.66	109657	22.66	107680	22.66	90545.5
22.68	108394	22.68	104011	22.68	90577.8
22.7	108771	22.7	96435.7	22.7	90393.5
22.72	107960	22.72	93334.5	22.72	91120
22.74	105806	22.74	89124.9	22.74	92215.9
22.76	103074	22.76	83907.7	22.76	89148.5
22.78	99279.2	22.78	79952	22.78	93098.6
22.8	99171.8	22.8	76120.4	22.8	89327.9
22.82	95390.8	22.82	75160.6	22.82	89540
22.84	93994.6	22.84	71928.6	22.84	93062.7
22.86	91941.2	22.86	69214.4	22.86	92216.5
22.88	92048	22.88	68643.1	22.88	95830.4
22.9	89935.4	22.9	65784	22.9	94949.8
22.92	90236.4	22.92	66726.7	22.92	99077.5
22.94	90050.2	22.94	62996.5	22.94	98619.1
22.96	88316.3	22.96	60826.7	22.96	97334.6
22.98	87003	22.98	58914.7	22.98	102125
23	86373.6	23	60915.1	23	101912
23.02	84140.2	23.02	58838.1	23.02	100628
23.04	84653.5	23.04	60200	23.04	105466
23.06	83372.4	23.06	59505.4	23.06	104748
23.08	83961	23.08	58410.3	23.08	104235
23.1	84105.1	23.1	57820.7	23.1	106206
23.12	83091.7	23.12	57624.5	23.12	103775
23.14	83062.1	23.14	57795.1	23.14	100698
23.16	81991.9	23.16	57068.7	23.16	100041
23.18	80413.1	23.18	55612.9	23.18	98418.9
23.2	80225	23.2	55272.6	23.2	94667.2
23.22	78128.8	23.22	57110.4	23.22	93082.7
23.24	82504.6	23.24	54892.2	23.24	93266.5
23.26	80673.7	23.26	54145.8	23.26	89404.2
23.28	80189.3	23.28	53054.6	23.28	88630.3
23.3	77643.7	23.3	55654.2	23.3	89408.1
23.32	78078	23.32	56624.3	23.32	87016.2
23.34	76391.1	23.34	53466	23.34	88485.5
23.36	77800.6	23.36	54856.7	23.36	85660
23.38	77449.4	23.38	53292.4	23.38	85525.7
23.4	77171.9	23.4	53530.5	23.4	84969.6
23.42	76782.4	23.42	55014.8	23.42	84563.7
23.44	75443.4	23.44	54419.1	23.44	84431.4
23.46	76250.3	23.46	54958.8	23.46	83688.7
23.48	75527.5	23.48	53752.8	23.48	83810.8
23.5	75052.5	23.5	54317.4	23.5	85701
23.52	76466.5	23.52	53619.3	23.52	84849.1
23.54	76629.3	23.54	54725.4	23.54	82355.5
23.56	72889.5	23.56	53898.7	23.56	83121.1
23.58	75288.5	23.58	54073.5	23.58	83326.8
23.6	72882.3	23.6	51662.2	23.6	82275.8
23.62	73534.7	23.62	53901.9	23.62	85787.1
23.64	74752.7	23.64	54570.8	23.64	81156.3
23.66	74595.3	23.66	53064.9	23.66	84012.8
23.68	75024.9	23.68	52050.6	23.68	81959
23.7	73566.9	23.7	55003.8	23.7	80923.4
23.72	74347.5	23.72	54432.8	23.72	81527.1
23.74	72422.7	23.74	53358.3	23.74	82607.9
23.76	73346	23.76	53652	23.76	80710.6
23.78	72822.6	23.78	53415.2	23.78	82120.3
23.8	73343.6	23.8	53059.3	23.8	79924.6
23.82	74889.8	23.82	51571.8	23.82	81430.4
23.84	73177.2	23.84	53240.8	23.84	80139.3
23.86	74473.9	23.86	52954.9	23.86	81277
23.88	75060.1	23.88	51381.7	23.88	81938.4
23.9	76266.4	23.9	53330	23.9	79606.8
23.92	74673	23.92	53292.7	23.92	80089
23.94	74984.7	23.94	55573.7	23.94	81443
23.96	76156.9	23.96	55299.2	23.96	78453.3
23.98	74953.1	23.98	54754.3	23.98	80861.6
24	75743.3	24	55654.3	24	79252.5
24.02	77273.2	24.02	57308.5	24.02	79126
24.04	78499.3	24.04	58177.7	24.04	78850.6
24.06	79017.1	24.06	56181.8	24.06	79109.9
24.08	77686.3	24.08	59431.8	24.08	79726.9
24.1	79620.5	24.1	62113.8	24.1	79723.4
24.12	81655	24.12	63294.4	24.12	79740.7
24.14	81781.2	24.14	65765	24.14	80375.6
24.16	84412.5	24.16	64829.6	24.16	80813.1
24.18	85072.9	24.18	66657.2	24.18	81312.5
24.2	86440.7	24.2	68208.3	24.2	81361.8
24.22	88606.9	24.22	71454.8	24.22	80711.5
24.24	90377.6	24.24	74426.8	24.24	79657.5
24.26	92137.5	24.26	78009.2	24.26	80026.5
24.28	92737.7	24.28	76954.7	24.28	79580.4
24.3	96538.9	24.3	83570.3	24.3	79681.6
24.32	97019.9	24.32	83890.8	24.32	81485.1
24.34	99079.3	24.34	87149.2	24.34	82704.4
24.36	104813	24.36	86138.7	24.36	79524.6
24.38	107225	24.38	85989.8	24.38	82626.1
24.4	109469	24.4	87275.3	24.4	78591
24.42	112135	24.42	89039.8	24.42	80631.5
24.44	115026	24.44	88180.7	24.44	78685.8
24.46	122267	24.46	87159.7	24.46	80008.3
24.48	121844	24.48	88647.6	24.48	81342.2
24.5	124520	24.5	88253	24.5	79855
24.52	129876	24.52	87031.3	24.52	79420.5
24.54	131227	24.54	84826.6	24.54	83498.9
24.56	130238	24.56	83049.5	24.56	83545
24.58	134342	24.58	82938.7	24.58	85688.2
24.6	134670	24.6	82967.3	24.6	83447.7
24.62	136421	24.62	79846.2	24.62	86313.7
24.64	137297	24.64	76802.7	24.64	88920
24.66	137851	24.66	76563.7	24.66	91720.2
24.68	136761	24.68	75068.6	24.68	97709.4
24.7	134257	24.7	71520.5	24.7	100015
24.72	133573	24.72	70034.3	24.72	104923
24.74	131271	24.74	66478.2	24.74	108787
24.76	129109	24.76	62452.5	24.76	115164
24.78	126467	24.78	61838.3	24.78	125435
24.8	122690	24.8	58605.5	24.8	134865
24.82	118760	24.82	58117.5	24.82	141314
24.84	115390	24.84	54851.3	24.84	154635
24.86	113633	24.86	54218.7	24.86	160522
24.88	110662	24.88	53326	24.88	169681
24.9	104077	24.9	52843.8	24.9	177758
24.92	101241	24.92	51323.2	24.92	186070
24.94	101448	24.94	51718.1	24.94	189832
24.96	96343.3	24.96	49696.5	24.96	196347
24.98	90838.3	24.98	50594.8	24.98	194262
25	89529.2	25	50454.6	25	196700
25.02	87490.8	25.02	49332.6	25.02	194516
25.04	84154.6	25.04	50128.5	25.04	182669
25.06	81830.6	25.06	49224.2	25.06	173711
25.08	80296	25.08	50502.5	25.08	157638
25.1	78945.9	25.1	48135.7	25.1	144214
25.12	76765	25.12	48706.1	25.12	131785
25.14	75120.5	25.14	48423.9	25.14	120889
25.16	75596.6	25.16	50955.2	25.16	110910
25.18	72069.8	25.18	50874.4	25.18	103325
25.2	71660.1	25.2	51681.9	25.2	96377.7
25.22	71604	25.22	51110.4	25.22	92174.7
25.24	71045.1	25.24	51392.5	25.24	88186.6
25.26	69069	25.26	52559.8	25.26	86444.3
25.28	69059.1	25.28	55925.1	25.28	82894.5
25.3	66962.8	25.3	55995.3	25.3	81894.1
25.32	67131.8	25.32	57126.4	25.32	82235.1
25.34	66289.3	25.34	58091.5	25.34	83512.2
25.36	65090.9	25.36	59420.8	25.36	82573.1
25.38	66778.1	25.38	58401.4	25.38	80365.9
25.4	65434.3	25.4	62191.1	25.4	80468.3
25.42	64136.2	25.42	63269.8	25.42	81877.1
25.44	63315.4	25.44	67721.6	25.44	83248.3
25.46	63463	25.46	66532	25.46	85907
25.48	63705.9	25.48	71310.4	25.48	88994.9
25.5	63626.7	25.5	68122.7	25.5	90224.8
25.52	63039	25.52	70952.3	25.52	95675.2
25.54	62940.7	25.54	72447.2	25.54	99574.1
25.56	61404.6	25.56	71796.2	25.56	105614
25.58	62111.8	25.58	71391	25.58	110675
25.6	60475.5	25.6	71024.1	25.6	115299
25.62	61355	25.62	71028.3	25.62	122027
25.64	61763.2	25.64	70671.9	25.64	126791
25.66	60445.3	25.66	67179.6	25.66	131691
25.68	61209.3	25.68	64593	25.68	132424
25.7	63015.8	25.7	63433.3	25.7	126191
25.72	61510.2	25.72	64022.4	25.72	120149
25.74	60539.7	25.74	61537.7	25.74	113086
25.76	60026	25.76	62248.1	25.76	106858
25.78	60990.6	25.78	60403	25.78	100892
25.8	61425	25.8	59747.5	25.8	93235.3
25.82	60356.6	25.82	59196.7	25.82	88413.7
25.84	61224.8	25.84	60995.8	25.84	84834.6
25.86	61745.1	25.86	59358	25.86	83795.3
25.88	59358.2	25.88	65106.8	25.88	81084.4
25.9	61357.3	25.9	62889.2	25.9	76256.8
25.92	62959.6	25.92	66785.2	25.92	74034
25.94	63939.7	25.94	65377.9	25.94	73204.1
25.96	62952	25.96	71178.8	25.96	74828.6
25.98	66337.6	25.98	72617.6	25.98	73696.3
26	66197.4	26	76441.6	26	74500.7
26.02	68670	26.02	80697.6	26.02	71780.6
26.04	68175.2	26.04	83459.2	26.04	73379.5
26.06	69699	26.06	87233.1	26.06	71444.1
26.08	70766.7	26.08	93919.5	26.08	72133.3
26.1	72011	26.1	97739.7	26.1	71360.1
26.12	72798.1	26.12	100872	26.12	70149.4
26.14	72712.5	26.14	105485	26.14	70260.4
26.16	74083.2	26.16	108075	26.16	75270.3
26.18	70265.9	26.18	107652	26.18	71909
26.2	71768.7	26.2	110076	26.2	73291.9
26.22	69205	26.22	109525	26.22	74627.4
26.24	66406.9	26.24	112619	26.24	74332.1
26.26	65252.9	26.26	111117	26.26	77535.1
26.28	65087.8	26.28	111398	26.28	77479.6
26.3	63237	26.3	104769	26.3	81480.1
26.32	62427	26.32	102897	26.32	81571.3
26.34	59940.5	26.34	95785.3	26.34	82658.3
26.36	60052	26.36	91126.9	26.36	86217.2
26.38	60203.6	26.38	86035.1	26.38	90264.2
26.4	58764.4	26.4	78594.5	26.4	93638.2
26.42	58741.7	26.42	75666	26.42	96851.4
26.44	56507.5	26.44	69350.8	26.44	103339
26.46	57226.1	26.46	63160.2	26.46	106128
26.48	57032.2	26.48	61000.3	26.48	114357
26.5	55673	26.5	59698.4	26.5	121739
26.52	55612.6	26.52	57802.5	26.52	126819
26.54	56084.1	26.54	54221.7	26.54	131607
26.56	56824.6	26.56	53260.5	26.56	140004
26.58	57344.2	26.58	51389.8	26.58	143428
26.6	56247.8	26.6	50918.9	26.6	146927
26.62	56389.3	26.62	49167.8	26.62	145653
26.64	60954	26.64	48400	26.64	144739
26.66	73955.1	26.66	45877.4	26.66	138910
26.68	67514.9	26.68	45262.6	26.68	134207
26.7	57945.2	26.7	46031.9	26.7	125269
26.72	59257.4	26.72	43579.1	26.72	115394
26.74	61974.3	26.74	44158	26.74	108426
26.76	54424	26.76	44384.4	26.76	99131.6
26.78	53387.2	26.78	43200.7	26.78	95135.8
26.8	52248.4	26.8	42775.7	26.8	89774
26.82	51673.5	26.82	43540.3	26.82	84274.5
26.84	52085.7	26.84	41800.7	26.84	81215.5
26.86	51813.8	26.86	41219.7	26.86	79277.7
26.88	52051.6	26.88	42534.3	26.88	76087.7
26.9	52134	26.9	43085.7	26.9	74884.6
26.92	51922.7	26.92	42953.7	26.92	73946.1
26.94	50700.6	26.94	42670.3	26.94	72623.7
26.96	52361.8	26.96	42718.6	26.96	72502.3
26.98	51459.4	26.98	41102.9	26.98	71610.1
27	51019.1	27	42280.2	27	70669.1
27.02	49806.2	27.02	42186.3	27.02	71712.2
27.04	50093.9	27.04	43133.3	27.04	71779.4
27.06	51379.4	27.06	42713.3	27.06	71122.3
27.08	49612.2	27.08	42965.9	27.08	74284
27.1	50973.7	27.1	42239.7	27.1	70147.2
27.12	50170.7	27.12	44779.9	27.12	71166.2
27.14	50356.9	27.14	42436.1	27.14	72233.7
27.16	50001.5	27.16	45258.9	27.16	70565.8
27.18	49516.5	27.18	46699.8	27.18	69698.4
27.2	49504.6	27.2	43897.3	27.2	70557.4
27.22	50857.6	27.22	45837.3	27.22	71340.9
27.24	49862.2	27.24	47423.4	27.24	69468.4
27.26	50317.3	27.26	47737.8	27.26	68075.2
27.28	51868.1	27.28	45212.7	27.28	68254.3
27.3	50754.6	27.3	45986.2	27.3	66804.8
27.32	49652.5	27.32	48527	27.32	66871.2
27.34	49167.1	27.34	47878.3	27.34	69061.9
27.36	49228.5	27.36	48143.5	27.36	67193.9
27.38	48264.3	27.38	45035.9	27.38	66978.9
27.4	50105.1	27.4	46908.8	27.4	65543.6
27.42	48662.1	27.42	46045.4	27.42	62940.9
27.44	49099.4	27.44	45056.6	27.44	66770.8
27.46	48932.1	27.46	43934.3	27.46	65914.5
27.48	48204.6	27.48	46371.8	27.48	64760.4
27.5	48046.3	27.5	40731.8	27.5	63334.2
27.52	50272	27.52	41153.6	27.52	63125.2
27.54	49360	27.54	42937.1	27.54	64256.4
27.56	48382.5	27.56	41891.1	27.56	64401
27.58	48911.2	27.58	42505.8	27.58	64193.8
27.6	49587.3	27.6	42451.4	27.6	64761.8
27.62	48564.7	27.62	42073.2	27.62	63344.5
27.64	48269.9	27.64	42636.3	27.64	63018.1
27.66	48496.9	27.66	41801	27.66	61381.4
27.68	50116.1	27.68	42939.4	27.68	61336.3
27.7	47193.3	27.7	42261.2	27.7	64231.2
27.72	48868.4	27.72	41531.2	27.72	63730.6
27.74	47551.8	27.74	42560.7	27.74	63634.7
27.76	49570.2	27.76	41824.3	27.76	64657.7
27.78	48180.3	27.78	42987.9	27.78	64962
27.8	48734.2	27.8	42641.3	27.8	65228.2
27.82	49432.9	27.82	43453.7	27.82	64714.8
27.84	48165.8	27.84	43029.1	27.84	65815.1
27.86	47660.9	27.86	44538.3	27.86	69395.4
27.88	48503.6	27.88	44972.8	27.88	70807.2
27.9	48606.4	27.9	44692.1	27.9	70883.6
27.92	49292.3	27.92	46415	27.92	76062.3
27.94	48720.9	27.94	47372.1	27.94	76947.1
27.96	48448.6	27.96	47288	27.96	79844.6
27.98	48841.5	27.98	48648.3	27.98	80853.5
28	48762.9	28	48766.4	28	80491
28.02	47470	28.02	50467.7	28.02	81334.5
28.04	48847.1	28.04	51493.3	28.04	80565.2
28.06	47056.1	28.06	52009.7	28.06	79395.7
28.08	48409.5	28.08	51491.7	28.08	75541.3
28.1	48867.3	28.1	52326.8	28.1	73718
28.12	49828	28.12	52414.1	28.12	72322.1
28.14	48705.8	28.14	55026.1	28.14	69381.6
28.16	48331.5	28.16	54517.5	28.16	67278.6
28.18	48233	28.18	53679.6	28.18	64490.8
28.2	48948.4	28.2	52316.3	28.2	64790
28.22	48342.4	28.22	55158.7	28.22	64135.2
28.24	49402.2	28.24	54081.1	28.24	64799.8
28.26	49089.1	28.26	53547.2	28.26	63689.5
28.28	48079.8	28.28	52986.5	28.28	64728.2
28.3	47402.1	28.3	50508.1	28.3	63437.8
28.32	49316.4	28.32	50108.3	28.32	62960.4
28.34	51359	28.34	47268.4	28.34	64705.6
28.36	49207.9	28.36	46644	28.36	64397.7
28.38	49671.1	28.38	45705.5	28.38	68544.7
28.4	48875.8	28.4	44347.3	28.4	65902.1
28.42	48804.9	28.42	43925.9	28.42	69602.2
28.44	50286.2	28.44	41050.8	28.44	70282.7
28.46	49495.8	28.46	42393.2	28.46	71371.3
28.48	49696.8	28.48	41987.1	28.48	73872.4
28.5	49640.9	28.5	40912.1	28.5	78466.4
28.52	49398.5	28.52	41009.3	28.52	79570.5
28.54	50437.5	28.54	39807.7	28.54	81053
28.56	50680.8	28.56	40667.6	28.56	86805
28.58	50449.8	28.58	40703.2	28.58	90285.7
28.6	50202.5	28.6	38348.1	28.6	97568.9
28.62	51654.5	28.62	40822.8	28.62	100444
28.64	51385.5	28.64	40025.7	28.64	103846
28.66	51285.2	28.66	40974.6	28.66	110018
28.68	51895	28.68	42458.3	28.68	113347
28.7	51428.3	28.7	40414.2	28.7	116392
28.72	52916.1	28.72	41471.4	28.72	116333
28.74	51553.4	28.74	43787	28.74	117636
28.76	52836	28.76	43802.1	28.76	114137
28.78	53238.1	28.78	41986.3	28.78	111003
28.8	52147.3	28.8	42748.8	28.8	107471
28.82	53225.4	28.82	44258.8	28.82	99682.1
28.84	54359.3	28.84	45222.2	28.84	93123.6
28.86	53098.3	28.86	46924	28.86	85821.4
28.88	55701.9	28.88	48215.8	28.88	80986
28.9	55428.1	28.9	48885.3	28.9	76131.1
28.92	55549.3	28.92	52139	28.92	71612.7
28.94	55223.1	28.94	52467.2	28.94	70851.6
28.96	56481	28.96	54480	28.96	68269.4
28.98	56582.1	28.98	56388.4	28.98	64348.8
29	57083.4	29	55032.5	29	64232.7
29.02	56434.5	29.02	56072.8	29.02	63145.7
29.04	56474.8	29.04	56392.6	29.04	63386.3
29.06	59455.9	29.06	56272.7	29.06	62723.5
29.08	58206.5	29.08	58409.6	29.08	63097.6
29.1	59250.5	29.1	56604.9	29.1	60840.7
29.12	59911.3	29.12	56485	29.12	60095.2
29.14	58987.4	29.14	53334	29.14	59268.4
29.16	59795.5	29.16	52513	29.16	58562.4
29.18	60440.4	29.18	50401.9	29.18	60910.9
29.2	59706.5	29.2	49426.1	29.2	59076.3
29.22	58696.6	29.22	48041.5	29.22	61330.8
29.24	60303.2	29.24	44307.3	29.24	60690.8
29.26	60247.4	29.26	44825.5	29.26	62194.5
29.28	58799.2	29.28	46444.6	29.28	64254.9
29.3	59154.8	29.3	41697.2	29.3	64512.7
29.32	58992.8	29.32	43500.7	29.32	66064.6
29.34	59029	29.34	42132.6	29.34	66651.1
29.36	59376.5	29.36	41797	29.36	67047.3
29.38	58655.6	29.38	42900.1	29.38	68927.7
29.4	58570	29.4	41863.1	29.4	69771.5
29.42	57347.9	29.42	43253.7	29.42	73025.1
29.44	58523.4	29.44	43706.2	29.44	76293.7
29.46	56574.4	29.46	43703	29.46	76687.7
29.48	56298.4	29.48	43348.5	29.48	80676.5
29.5	55356.2	29.5	43539.6	29.5	78482
29.52	55647.4	29.52	44512.6	29.52	77725.2
29.54	54822.4	29.54	47878	29.54	76949.6
29.56	53684.1	29.56	47473.8	29.56	74952.8
29.58	53218.6	29.58	48358.4	29.58	76632.7
29.6	52876.9	29.6	48952.9	29.6	75155
29.62	52164.8	29.62	49569.5	29.62	72577.2
29.64	53160.7	29.64	50763	29.64	68092.4
29.66	50989.9	29.66	51329.5	29.66	70119.7
29.68	50845.8	29.68	52772.4	29.68	66140.8
29.7	51824.3	29.7	52704.2	29.7	65549.1
29.72	50649.8	29.72	51736.6	29.72	65249.6
29.74	49998.6	29.74	52665.1	29.74	62583.5
29.76	50445.4	29.76	49494.7	29.76	59407.2
29.78	51497.1	29.78	50710.6	29.78	58213.3
29.8	50827.1	29.8	52627.3	29.8	58411.7
29.82	49329.8	29.82	50594.6	29.82	58512.8
29.84	49670.9	29.84	48176.2	29.84	57373.3
29.86	48780.1	29.86	48999.6	29.86	55548.3
29.88	49347.7	29.88	47844.2	29.88	55753.4
29.9	48223.3	29.9	45929.3	29.9	56854.5
29.92	49282.8	29.92	45010.7	29.92	55409.1
29.94	46730.4	29.94	44783.3	29.94	53967.6
29.96	47885.4	29.96	43109	29.96	54761.6
29.98	46966.3	29.98	43426	29.98	53918.6
30	47864.5	30	40677.8	30	54621.3
30.02	47073.2	30.02	40238.2	30.02	53389.5
30.04	47959.9	30.04	39094.6	30.04	53760.4
30.06	46905.7	30.06	38326.2	30.06	53569.8
30.08	46488.3	30.08	37086.2	30.08	52517
30.1	46639	30.1	36077.1	30.1	52294.1
30.12	45357.3	30.12	36271	30.12	53041.5
30.14	45175.7	30.14	35754.6	30.14	51526.1
30.16	45476.2	30.16	35446.6	30.16	53332.2
30.18	44106.5	30.18	37048.2	30.18	51041
30.2	44946	30.2	35382.5	30.2	53701
30.22	44252.3	30.22	36381.3	30.22	51853.4
30.24	45024.5	30.24	35358.2	30.24	54559.5
30.26	45790.8	30.26	35396.5	30.26	52465
30.28	43811.6	30.28	33165.7	30.28	52326.7
30.3	43686.3	30.3	35644.9	30.3	50476.7
30.32	43403.4	30.32	35776.6	30.32	54539.9
30.34	44396.4	30.34	36492.9	30.34	52434.8
30.36	43397.3	30.36	34766.3	30.36	52914.5
30.38	44072.1	30.38	36079	30.38	50833.3
30.4	42645.2	30.4	37120.5	30.4	52626.6
30.42	43450	30.42	35244.5	30.42	51900.1
30.44	43390.4	30.44	35033.8	30.44	51254.9
30.46	43108.6	30.46	36933	30.46	51567.9
30.48	42848.7	30.48	37259.3	30.48	51707.3
30.5	43462.1	30.5	38037.2	30.5	51705.6
30.52	42220	30.52	37081.6	30.52	53250.2
30.54	42680	30.54	36913.9	30.54	51725.6
30.56	44145.6	30.56	39134	30.56	52739.2
30.58	41756.3	30.58	38816.9	30.58	52907.9
30.6	43112.2	30.6	38865.4	30.6	54353.4
30.62	43189.8	30.62	40005.6	30.62	53599
30.64	43721.7	30.64	39947.4	30.64	54877.3
30.66	44315.5	30.66	39239.3	30.66	55573.8
30.68	41845.5	30.68	40320.6	30.68	58048
30.7	43616.9	30.7	41070.9	30.7	58107.8
30.72	42954.1	30.72	40818.2	30.72	58198
30.74	42482.1	30.74	39217.9	30.74	61904.3
30.76	43103.9	30.76	40143.9	30.76	62496.8
30.78	42941.6	30.78	39161.3	30.78	64398.2
30.8	42949.2	30.8	38036.9	30.8	66426
30.82	42838.4	30.82	38277.2	30.82	70182
30.84	43580.5	30.84	39538.1	30.84	73926
30.86	44502.9	30.86	37784.5	30.86	75035.7
30.88	43137.6	30.88	37903.7	30.88	81540.8
30.9	44607.7	30.9	38046.5	30.9	83548.1
30.92	43512.1	30.92	39708.5	30.92	89160.1
30.94	44563.1	30.94	38449.9	30.94	90691.7
30.96	44002.9	30.96	37532.4	30.96	94289.2
30.98	44675	30.98	39599.1	30.98	95641.4
31	44648.8	31	39334.7	31	96460.3
31.02	45511.1	31.02	38865.7	31.02	96897.5
31.04	46265.5	31.04	40491.5	31.04	93379.6
31.06	46090.1	31.06	40119.1	31.06	93237.6
31.08	45315.5	31.08	41125.4	31.08	86072.3
31.1	47320.5	31.1	42891.9	31.1	83541.8
31.12	46484	31.12	42204	31.12	78308.7
31.14	47287.5	31.14	43253.8	31.14	73798.3
31.16	47281.6	31.16	43038.4	31.16	70187.9
31.18	46130.2	31.18	43662.3	31.18	65292.7
31.2	47657.8	31.2	42611.7	31.2	62483.7
31.22	47933.5	31.22	45046.1	31.22	60270.9
31.24	47474.6	31.24	44828.2	31.24	57306.8
31.26	49541.8	31.26	44409.8	31.26	55229.7
31.28	48605.7	31.28	44941.6	31.28	54224.3
31.3	48007.3	31.3	46000.5	31.3	55920.3
31.32	49159.8	31.32	45438	31.32	54049.1
31.34	48931.2	31.34	44758	31.34	56149.2
31.36	48811.7	31.36	40707.5	31.36	55654.2
31.38	48974.4	31.38	42882.7	31.38	55134.1
31.4	49390.8	31.4	41294.2	31.4	54273.1
31.42	47958.6	31.42	41223.1	31.42	56777.1
31.44	49028.9	31.44	40183.3	31.44	60297.3
31.46	48427.7	31.46	37878.2	31.46	59820.6
31.48	48691.9	31.48	37019.9	31.48	61358.3
31.5	49308.2	31.5	36844	31.5	61806.3
31.52	50498.9	31.52	37438.4	31.52	65303.3
31.54	49672.6	31.54	37171.4	31.54	63887.5
31.56	50015.9	31.56	35223.6	31.56	62159.9
31.58	48977.7	31.58	34036	31.58	62926.2
31.6	48123.8	31.6	34090.1	31.6	59114.7
31.62	49919.1	31.62	32985	31.62	59087.6
31.64	45919.7	31.64	34085.8	31.64	57626.3
31.66	47873.7	31.66	33310.1	31.66	56069.5
31.68	46327.1	31.68	33159.1	31.68	53622.3
31.7	45630.3	31.7	33294.8	31.7	51119.3
31.72	45766.4	31.72	32411.4	31.72	49641.5
31.74	43870.7	31.74	30706.2	31.74	49590.6
31.76	44080.4	31.76	30964.2	31.76	49222.6
31.78	45040.7	31.78	31553.3	31.78	47806.7
31.8	42195.8	31.8	32020.3	31.8	47635.1
31.82	42127.3	31.82	30512.5	31.82	47450.2
31.84	42150.9	31.84	30934.8	31.84	48467.6
31.86	41408.3	31.86	28943	31.86	46582.1
31.88	41382.7	31.88	30316.4	31.88	45645.1
31.9	40889.1	31.9	30776.2	31.9	46703.1
31.92	41228.6	31.92	29404.4	31.92	45885.1
31.94	39111.6	31.94	30914.1	31.94	47087.6
31.96	39528.3	31.96	31977.3	31.96	45111.6
31.98	40393	31.98	29044.2	31.98	46133.3
32	39477.3	32	30708.2	32	46786.5
32.02	40422.6	32.02	31033.7	32.02	46106.8
32.04	39282.6	32.04	31735.5	32.04	45522.9
32.06	39797.2	32.06	29960.5	32.06	46352.9
32.08	38569.5	32.08	30882.8	32.08	46093.5
32.1	37733.6	32.1	31093.1	32.1	46119.7
32.12	37273.7	32.12	32401	32.12	46478
32.14	39679	32.14	31900.7	32.14	46967.7
32.16	38288.6	32.16	32349	32.16	47060.9
32.18	38463.5	32.18	31561.8	32.18	45949.4
32.2	38515.5	32.2	30731.2	32.2	46520.7
32.22	38085	32.22	31003.5	32.22	47516.7
32.24	36683.9	32.24	31971.3	32.24	44422.7
32.26	36495.3	32.26	31710.3	32.26	45208.2
32.28	36424.6	32.28	31563.4	32.28	47179.3
32.3	36577	32.3	31395.8	32.3	45778.2
32.32	36468.5	32.32	31011	32.32	47664.5
32.34	36972.6	32.34	30891.5	32.34	46222
32.36	35801.4	32.36	29852.8	32.36	43299.3
32.38	36257.3	32.38	30998.3	32.38	45204.9
32.4	36114.8	32.4	30197.2	32.4	45528.5
32.42	34950.8	32.42	30401.8	32.42	44540.3
32.44	35114.4	32.44	30390.6	32.44	43920.9
32.46	35848.9	32.46	31479	32.46	45506.3
32.48	35462.8	32.48	30989.3	32.48	45067.2
32.5	35351.6	32.5	30853.3	32.5	43668.3
32.52	35094.5	32.52	31428.2	32.52	42725.6
32.54	35147.5	32.54	31733.4	32.54	45004.6
32.56	35117	32.56	31238.3	32.56	43405.7
32.58	34796.9	32.58	33410.2	32.58	44210.8
32.6	34461	32.6	32823.1	32.6	44136.6
32.62	34101.1	32.62	32176.2	32.62	43802.7
32.64	35431.7	32.64	32414.9	32.64	44123.3
32.66	34297.4	32.66	34464.1	32.66	44424.3
32.68	34759.4	32.68	33751.7	32.68	45582.9
32.7	33231.1	32.7	34866.2	32.7	42904.4
32.72	33926.1	32.72	37599.4	32.72	43327.3
32.74	35574.5	32.74	34971	32.74	45914.2
32.76	34624.2	32.76	34069.8	32.76	43726.9
32.78	32861.7	32.78	35309	32.78	43474.7
32.8	32321	32.8	35217.7	32.8	44393.9
32.82	33449.7	32.82	35314.3	32.82	45854.2
32.84	34209.8	32.84	34663.9	32.84	46174.7
32.86	33926.3	32.86	33567.9	32.86	45226.4
32.88	33505	32.88	33774.5	32.88	44210.6
32.9	33907.8	32.9	32670.5	32.9	43926.1
32.92	33374	32.92	33660.3	32.92	42627.3
32.94	33816.6	32.94	31407.8	32.94	44008.5
32.96	33944.9	32.96	29840.8	32.96	43600.5
32.98	33824.3	32.98	30926.8	32.98	42224.6
33	33423	33	31082	33	42377.6
33.02	32669.6	33.02	30420.3	33.02	41340.1
33.04	32911.8	33.04	29565	33.04	41996
33.06	32293.4	33.06	29858.4	33.06	42276.4
33.08	32402.2	33.08	29463.2	33.08	41674.9
33.1	32368.3	33.1	27254.6	33.1	39197.6
33.12	31879.5	33.12	27789.9	33.12	41223.8
33.14	32935.8	33.14	28607.8	33.14	40710.6
33.16	31585.9	33.16	27678.8	33.16	41034.2
33.18	33186.5	33.18	26654.2	33.18	39663.9
33.2	32832.9	33.2	27099	33.2	39817.8
33.22	32581.8	33.22	27393.3	33.22	40451
33.24	31354.6	33.24	26853.2	33.24	42513.5
33.26	31428.2	33.26	26335.7	33.26	42423.9
33.28	32151.8	33.28	26987	33.28	41997
33.3	31768.9	33.3	27836.8	33.3	41635.4
33.32	32916.3	33.32	27203.8	33.32	42123
33.34	33082	33.34	27786.3	33.34	41488.5
33.36	32429.2	33.36	27504.3	33.36	43840.1
33.38	32183.7	33.38	27953.8	33.38	45357.1
33.4	31873.1	33.4	27518	33.4	45210.8
33.42	31675.8	33.42	27073.2	33.42	46176.9
33.44	31750.7	33.44	28498.9	33.44	47436.8
33.46	31567.5	33.46	28316.6	33.46	49075.8
33.48	31762.2	33.48	28902.2	33.48	48730.7
33.5	32345.5	33.5	29201	33.5	51054.3
33.52	31253	33.52	28392	33.52	51633.2
33.54	31541.7	33.54	28424.6	33.54	52443.4
33.56	31608.1	33.56	29342.7	33.56	53843.3
33.58	32734.2	33.58	28100.9	33.58	53954.1
33.6	32405.1	33.6	30319.8	33.6	51923.1
33.62	32253.4	33.62	29166.8	33.62	54442.5
33.64	32706.1	33.64	30712.5	33.64	53157.7
33.66	32391.2	33.66	31000.4	33.66	52457.9
33.68	31825.7	33.68	27422	33.68	52299.6
33.7	32410.6	33.7	30137.7	33.7	52905.7
33.72	32421.4	33.72	30117.8	33.72	50738.8
33.74	32375.4	33.74	29906.3	33.74	51197.3
33.76	32362.9	33.76	29689.6	33.76	48732.3
33.78	33317.1	33.78	29157.6	33.78	47708.8
33.8	32824.9	33.8	30329.8	33.8	45917.7
33.82	33586.3	33.82	29588.9	33.82	45497.8
33.84	34076.8	33.84	30364.2	33.84	44910.2
33.86	33807.9	33.86	28972.5	33.86	42022.1
33.88	33692	33.88	30618.4	33.88	44054.5
33.9	32999.9	33.9	29341	33.9	43502.3
33.92	33485.4	33.92	29199.3	33.92	41651.9
33.94	33722.9	33.94	31812.3	33.94	40372.7
33.96	32977.1	33.96	31754.8	33.96	42152.6
33.98	33808.8	33.98	29563.4	33.98	40695.5
34	33265.8	34	30358.8	34	43758
34.02	33410.1	34.02	30531.3	34.02	40496.5
34.04	34369.1	34.04	30632.1	34.04	43483.7
34.06	32656.3	34.06	31001.8	34.06	45967.7
34.08	33151.1	34.08	33071.9	34.08	44291.7
34.1	34117.8	34.1	33013.6	34.1	45704.5
34.12	34854.5	34.12	35237.1	34.12	45033
34.14	34749.3	34.14	35056.4	34.14	46422.2
34.16	35085.8	34.16	35666.3	34.16	43925.9
34.18	35020.5	34.18	36486.4	34.18	46470.5
34.2	36741	34.2	35960.7	34.2	41888.3
34.22	36811.4	34.22	36108.6	34.22	42045.6
34.24	37185.1	34.24	35263	34.24	43904.9
34.26	37840.5	34.26	34957.5	34.26	41133
34.28	38621.3	34.28	34321.5	34.28	40608
34.3	38251.2	34.3	35058.5	34.3	39882.9
34.32	38304.5	34.32	34362	34.32	39517.4
34.34	39916.5	34.34	33697.8	34.34	38436.7
34.36	40027.7	34.36	33938.8	34.36	37342.1
34.38	39490.2	34.38	32518.2	34.38	38358
34.4	39603.3	34.4	32847.3	34.4	37003
34.42	40482	34.42	29843.4	34.42	36768
34.44	39970.7	34.44	29925.9	34.44	36964.6
34.46	38977.8	34.46	30414.6	34.46	37773.7
34.48	39212.7	34.48	29527.8	34.48	37266.3
34.5	39228.9	34.5	28850.1	34.5	38112.6
34.52	39444	34.52	28209.8	34.52	37626.5
34.54	37995.4	34.54	27299.7	34.54	39025.4
34.56	37010.1	34.56	27430.5	34.56	39185.7
34.58	37178.9	34.58	26977.3	34.58	39212.7
34.6	36995.5	34.6	26544.1	34.6	41158.7
34.62	38105.7	34.62	27118.8	34.62	42753.6
34.64	36776.8	34.64	27139.7	34.64	43377.4
34.66	35566.2	34.66	26989.3	34.66	42565.5
34.68	35655.3	34.68	26305.7	34.68	44358.9
34.7	34942.6	34.7	26495.4	34.7	45462.2
34.72	34520.9	34.72	27145.9	34.72	45886
34.74	34610.2	34.74	26583.7	34.74	45783.6
34.76	33172.9	34.76	26707.7	34.76	46082.1
34.78	34259	34.78	27751.2	34.78	47717.2
34.8	33423	34.8	26888.5	34.8	47449.1
34.82	33172.4	34.82	27525.9	34.82	46027.1
34.84	33940.5	34.84	26380.2	34.84	43992.1
34.86	32316.8	34.86	28093.3	34.86	44867
34.88	31438.1	34.88	29176.8	34.88	45053.1
34.9	32595.4	34.9	28893	34.9	43735.4
34.92	31254.9	34.92	29721.9	34.92	44384.6
34.94	31826.7	34.94	30454.3	34.94	41792.2
34.96	31486.4	34.96	30000.1	34.96	40719.4
34.98	31127	34.98	32953.7	34.98	39937.2
35	32204.8	35	33134.6	35	38921.9
35.02	31364.4	35.02	31822	35.02	38649.9
35.04	32181	35.04	32884.2	35.04	37604.5
35.06	30971.5	35.06	33283.4	35.06	38661.6
35.08	30806.2	35.08	34267.8	35.08	37432.6
35.1	31011	35.1	33475.6	35.1	36902
35.12	32132.2	35.12	35922.4	35.12	37065.1
35.14	31791.5	35.14	33320.3	35.14	35895.8
35.16	30473.2	35.16	34182	35.16	36370.7
35.18	31607.7	35.18	32724.9	35.18	35129
35.2	31494	35.2	33232.5	35.2	35707.2
35.22	30260.1	35.22	31335	35.22	35205.6
35.24	29609.4	35.24	31841.1	35.24	34134.8
35.26	30132.2	35.26	30774.8	35.26	34482.6
35.28	30379	35.28	29444.6	35.28	32099.5
35.3	30362.9	35.3	28515.4	35.3	34201.8
35.32	30290.4	35.32	29327	35.32	33664.2
35.34	30311.4	35.34	28142.6	35.34	34530.1
35.36	28962	35.36	27768.4	35.36	32922.9
35.38	29450.2	35.38	27301.8	35.38	33143.3
35.4	29054.3	35.4	27641	35.4	33239.1
35.42	29729	35.42	28184.3	35.42	33699.7
35.44	30165.9	35.44	28073.4	35.44	33228.4
35.46	30166.5	35.46	27144.2	35.46	35416.9
35.48	28837.7	35.48	27963.7	35.48	35635.1
35.5	28844.9	35.5	27653	35.5	34196.7
35.52	29853.6	35.52	28455.4	35.52	32409.5
35.54	29748.7	35.54	28439.8	35.54	34859.9
35.56	28759.3	35.56	28861.5	35.56	33871.1
35.58	29538.7	35.58	28577.3	35.58	34656.2
35.6	29268.6	35.6	28375.5	35.6	33422.5
35.62	29640.1	35.62	29227.7	35.62	34403.2
35.64	29618.9	35.64	29661.1	35.64	34227.6
35.66	29517.2	35.66	28355.9	35.66	34145.7
35.68	28665	35.68	28483.8	35.68	33835.1
35.7	29043.4	35.7	29294.2	35.7	33011.9
35.72	29701.7	35.72	26725.5	35.72	32696.2
35.74	28617.3	35.74	27875.1	35.74	35805.6
35.76	29307.9	35.76	27576.8	35.76	34255.2
35.78	28395.7	35.78	27779.3	35.78	35589
35.8	29181.8	35.8	27693.3	35.8	36691.7
35.82	28904	35.82	26731.3	35.82	35823.3
35.84	28867.6	35.84	27636.3	35.84	36054.8
35.86	27536.1	35.86	27343.4	35.86	36588.6
35.88	28674.8	35.88	25910.3	35.88	38939.4
35.9	29215.4	35.9	26586.9	35.9	39157.7
35.92	27735.8	35.92	25617.4	35.92	40509
35.94	29013.5	35.94	24780.2	35.94	40785.1
35.96	27131.6	35.96	24339.3	35.96	43304.3
35.98	27872.9	35.98	23105.7	35.98	41956.8
36	27770.4	36	23517.6	36	42349.6
36.02	28362.7	36.02	23734	36.02	41625.3
36.04	27629.7	36.04	24383.6	36.04	43202.1
36.06	27179.1	36.06	22658.7	36.06	42949.2
36.08	27198.1	36.08	23894.4	36.08	42771.4
36.1	27467.6	36.1	23825.1	36.1	38879.3
36.12	28693.4	36.12	22505.4	36.12	42454.5
36.14	27230.8	36.14	23025.4	36.14	41681.3
36.16	27602	36.16	22237.5	36.16	39793.5
36.18	26309.3	36.18	24031.7	36.18	41068.4
36.2	27286.2	36.2	23964.1	36.2	40728
36.22	26736.3	36.22	22087.8	36.22	39042.8
36.24	26820.5	36.24	22332.5	36.24	38446.9
36.26	26607.3	36.26	22478.2	36.26	38924.2
36.28	27052.8	36.28	21838.6	36.28	35737.2
36.3	26917	36.3	21293.1	36.3	35969.8
36.32	26692.5	36.32	21762.1	36.32	36182.8
36.34	27190.8	36.34	22432.8	36.34	35402.2
36.36	27010.7	36.36	23078.3	36.36	34740.3
36.38	26942.2	36.38	21529.3	36.38	34265.7
36.4	27947.8	36.4	21824.7	36.4	34015
36.42	26846.1	36.42	22955.9	36.42	34276.7
36.44	26733.8	36.44	21255.4	36.44	33354.4
36.46	28057.4	36.46	22140	36.46	33051.3
36.48	26808.9	36.48	22584.8	36.48	33703.2
36.5	28075.9	36.5	23040.8	36.5	35124
36.52	27389.5	36.52	21989.1	36.52	33804.2
36.54	26693.2	36.54	22475.6	36.54	34423.4
36.56	27738.3	36.56	23224.6	36.56	32892.1
36.58	26943.1	36.58	23348.9	36.58	34126.3
36.6	27857.7	36.6	22113.8	36.6	34539.9
36.62	26149.9	36.62	23529.6	36.62	32291.8
36.64	27150.3	36.64	23085.3	36.64	31704.6
36.66	27193.9	36.66	22623.1	36.66	32397.2
36.68	26598.7	36.68	24266.9	36.68	33701.8
36.7	28821	36.7	24348	36.7	32248.3
36.72	25831.3	36.72	22607.2	36.72	32464.4
36.74	26730.3	36.74	23726.4	36.74	32601.3
36.76	27455.2	36.76	23599.4	36.76	31795.6
36.78	26917	36.78	24479.9	36.78	32708.6
36.8	27915.7	36.8	23387.2	36.8	30947.1
36.82	27511.8	36.82	25458	36.82	31451.8
36.84	28280.3	36.84	25288.4	36.84	31402.5
36.86	26937.2	36.86	25341.6	36.86	30019.1
36.88	27553.1	36.88	27453.3	36.88	30062.3
36.9	27981.2	36.9	26629.6	36.9	32072.1
36.92	27952	36.92	27044.8	36.92	30992.9
36.94	27852.1	36.94	27255.7	36.94	30603.9
36.96	27459.9	36.96	25701.1	36.96	31745.8
36.98	28751.8	36.98	27872.2	36.98	32625.8
37	27512.3	37	29439.4	37	31765.2
37.02	27838.4	37.02	30367.8	37.02	30629.7
37.04	28003.7	37.04	29291.5	37.04	32215.5
37.06	27639.1	37.06	29154.3	37.06	30295.4
37.08	26607.3	37.08	30044.6	37.08	31828.4
37.1	27570.7	37.1	29442.5	37.1	33400
37.12	27790.2	37.12	30019.2	37.12	32715.8
37.14	27856.6	37.14	31520.1	37.14	33483
37.16	27812.1	37.16	29906.8	37.16	33715.3
37.18	28061.9	37.18	29843.6	37.18	33197.6
37.2	28524.2	37.2	28827.1	37.2	34239.6
37.22	27528.6	37.22	28589.1	37.22	35269.3
37.24	28252.1	37.24	28574	37.24	35046.1
37.26	27412.6	37.26	27938.5	37.26	35178.6
37.28	28724.9	37.28	26702.3	37.28	36140.5
37.3	28194.4	37.3	27244.2	37.3	34397.7
37.32	28436.6	37.32	27043.6	37.32	37707.7
37.34	28386.3	37.34	26755.7	37.34	36896.5
37.36	28158.6	37.36	25762	37.36	37563.1
37.38	28874.8	37.38	24217	37.38	36749.9
37.4	28887	37.4	24368.1	37.4	37231.8
37.42	27612.2	37.42	22683	37.42	36481.3
37.44	28245.4	37.44	24016.3	37.44	35668
37.46	28127.3	37.46	23409.2	37.46	35857
37.48	28037	37.48	22506.8	37.48	34335.4
37.5	28404.8	37.5	23345.8	37.5	35420.7
37.52	29110.8	37.52	23276.1	37.52	34061.9
37.54	28443.6	37.54	23947.1	37.54	32745.9
37.56	28311.8	37.56	23465.1	37.56	32316.4
37.58	27373.5	37.58	24035.8	37.58	32626.3
37.6	27151.5	37.6	23697.4	37.6	31268.7
37.62	27186.4	37.62	22426.3	37.62	30720.4
37.64	27197.7	37.64	22475.4	37.64	30925.5
37.66	27850	37.66	21994.3	37.66	32056.6
37.68	27921.4	37.68	23162.8	37.68	31342.3
37.7	26592.5	37.7	22447.5	37.7	30393.4
37.72	27974.6	37.72	21838.4	37.72	31426.3
37.74	27786.5	37.74	22921.5	37.74	30250.1
37.76	28708.8	37.76	24016.3	37.76	31999.5
37.78	26995.3	37.78	23174	37.78	28690.9
37.8	27473	37.8	23203.2	37.8	29699
37.82	27225.7	37.82	23081.3	37.82	28851.8
37.84	27123	37.84	23162.4	37.84	30851.4
37.86	27513.3	37.86	23149.2	37.86	30050
37.88	26555.3	37.88	22824.7	37.88	32453.6
37.9	27811.2	37.9	22482.8	37.9	30135.4
37.92	27857.8	37.92	22050.9	37.92	27913.8
37.94	26969.8	37.94	21365.2	37.94	29719.6
37.96	26882.8	37.96	22175.1	37.96	29256.8
37.98	25436.9	37.98	22201.9	37.98	30012.5
38	26464.8	38	22969.2	38	31811.1
38.02	26027.1	38.02	22104.1	38.02	29951.8
38.04	25872.4	38.04	21644.9	38.04	29941.9
38.06	26634.4	38.06	22494.1	38.06	30755.4
38.08	26861.1	38.08	21465.1	38.08	30355.3
38.1	26600.4	38.1	21422.3	38.1	30721.1
38.12	26398.5	38.12	21006.7	38.12	31700.8
38.14	26463.2	38.14	22148.2	38.14	30747.6
38.16	26038.8	38.16	21598	38.16	31097.5
38.18	26591	38.18	21720.2	38.18	30096.6
38.2	26420.2	38.2	22583.9	38.2	31040.6
38.22	26345.5	38.22	21839.7	38.22	32515.9
38.24	26193.7	38.24	20057.8	38.24	31234.5
38.26	26079.6	38.26	21617.1	38.26	33018.6
38.28	26112.4	38.28	19688.8	38.28	34228.5
38.3	26892.1	38.3	21566.9	38.3	34581.3
38.32	26403.3	38.32	22589.9	38.32	33972.6
38.34	26306	38.34	20962.9	38.34	34049.2
38.36	25790	38.36	19896.9	38.36	34246.8
38.38	26231.5	38.38	19867.1	38.38	33806.5
38.4	25897.3	38.4	21580.8	38.4	36028.1
38.42	25796.9	38.42	21173.3	38.42	36298.7
38.44	25912	38.44	21905.7	38.44	34872.1
38.46	25614.5	38.46	19841	38.46	35348.5
38.48	26472.1	38.48	19173.8	38.48	35990.9
38.5	26261.1	38.5	21103.9	38.5	34624.3
38.52	26590.2	38.52	21070.7	38.52	35292.8
38.54	24963	38.54	21550.8	38.54	33915.6
38.56	25854.3	38.56	20809.7	38.56	33367.5
38.58	25711.9	38.58	20605.6	38.58	33889.6
38.6	26290.9	38.6	18774.2	38.6	34383
38.62	25391.8	38.62	20821.2	38.62	34703.1
38.64	26969.2	38.64	20127.8	38.64	34646.9
38.66	25045.8	38.66	20544.4	38.66	34374.4
38.68	25637.1	38.68	19799.1	38.68	32375.4
38.7	26855.7	38.7	18602.3	38.7	32833.5
38.72	25982.4	38.72	19934.7	38.72	34155.5
38.74	25893.8	38.74	20228.1	38.74	34121.5
38.76	26158.4	38.76	20324	38.76	35208.1
38.78	25714.5	38.78	20743.1	38.78	35369.4
38.8	24836.7	38.8	19627.2	38.8	33951.1
38.82	26333.9	38.82	21293.7	38.82	34323.4
38.84	26385.2	38.84	21230.6	38.84	34073.1
38.86	25658.2	38.86	19956.4	38.86	34636.2
38.88	25234.1	38.88	20057.9	38.88	35908.2
38.9	26169	38.9	20318.7	38.9	34270.1
38.92	25384.9	38.92	20640.6	38.92	34698.8
38.94	25169.1	38.94	21283.3	38.94	35408.2
38.96	25516.9	38.96	20486.2	38.96	34153.7
38.98	25959.6	38.98	21146.4	38.98	33481.6
39	25781.2	39	20379.6	39	34508.7
39.02	25525.8	39.02	20775.3	39.02	34155.2
39.04	26198.9	39.04	20429.6	39.04	31315.2
39.06	25960.7	39.06	21196.3	39.06	33779.8
39.08	25576.9	39.08	21083	39.08	32181.9
39.1	25847.6	39.1	20493.3	39.1	31769
39.12	26623.6	39.12	21662.6	39.12	31947.9
39.14	25548.8	39.14	20495.3	39.14	32154.3
39.16	25359	39.16	20843.4	39.16	31802.9
39.18	25527.8	39.18	20844.3	39.18	33798.3
39.2	25743	39.2	21172.9	39.2	33188.3
39.22	25834.8	39.22	21591.6	39.22	34797.1
39.24	26597.1	39.24	21279.7	39.24	34675.6
39.26	25746.4	39.26	21086.7	39.26	34948.3
39.28	25374.8	39.28	21169	39.28	37465.3
39.3	26308	39.3	21606.9	39.3	37610.1
39.32	25338.6	39.32	21926.4	39.32	39063.6
39.34	25371.6	39.34	22545.3	39.34	40322.1
39.36	25597.4	39.36	23015.6	39.36	40976.9
39.38	26314.6	39.38	22658.4	39.38	41155
39.4	26231.6	39.4	20881.8	39.4	43509.8
39.42	25976.1	39.42	22531.8	39.42	42923.7
39.44	25608.3	39.44	23195.5	39.44	41452.6
39.46	25720.9	39.46	22241.6	39.46	41641.1
39.48	25597.8	39.48	23435.3	39.48	43114.2
39.5	25959.1	39.5	23745.7	39.5	42084.6
39.52	25902.9	39.52	23692.5	39.52	43407.2
39.54	25708.8	39.54	23134.8	39.54	41981.9
39.56	25714.4	39.56	24408.3	39.56	40752.4
39.58	26497.2	39.58	22860.1	39.58	39629.6
39.6	27047.3	39.6	23515.5	39.6	40106
39.62	26108.8	39.62	24142.8	39.62	39408.8
39.64	27062.9	39.64	24196.7	39.64	37470.2
39.66	26404.8	39.66	23945.7	39.66	36978.5
39.68	26187.2	39.68	25641.5	39.68	36729.2
39.7	26444.5	39.7	23717.3	39.7	33969.1
39.72	26467.7	39.72	23535.3	39.72	34487.6
39.74	25435.9	39.74	23575.5	39.74	33272.2
39.76	26914.8	39.76	24461.7	39.76	32055.7
39.78	26261.5	39.78	22559.7	39.78	31579.7
39.8	26332.2	39.8	23060.2	39.8	31833
39.82	27216.7	39.82	22517	39.82	30599.9
39.84	26532.9	39.84	22429.1	39.84	29297.5
39.86	26777.4	39.86	23129.6	39.86	30219.6
39.88	27970.3	39.88	21588.5	39.88	30383.5
39.9	26821.5	39.9	22023.7	39.9	29736.8
39.92	27214.6	39.92	20940.9	39.92	30136.5
39.94	27296.1	39.94	21044.4	39.94	29808.9
39.96	26718.9	39.96	21341.7	39.96	29982.3
39.98	27484.9	39.98	21441.5	39.98	29349.6
40	27153.9	40	21320	40	30391.4

## Sheet: Figure 3b
0	0
0.1	0
0.2	0
0.3	0
0.4	0
0.5	0
0.6	0
0.7	0
0.8	0
0.9	0
1	0
1.1	0.00861
1.2	0.03773
1.3	0.06951
1.4	0.05031
1.5	0.10393
1.6	0.27473
1.7	0.39653
1.8	0.36807
1.9	0.1986
2	0.22177
2.1	0.63617
2.2	0.47531
2.3	0.02979
2.4	0.22905
2.5	0.73812
2.6	2.12432
2.7	1.68278
2.8	0.09864
2.9	0.17874
3	0.94069
3.1	0.88508
3.2	0.1794
3.3	0.07216
3.4	0
3.5	0
3.6	0
3.7	0
3.8	0
3.9	0
4	0
4.1	0
4.2	0
4.3	0
4.4	0
4.5	0
4.6	0
4.7	0
4.8	0
4.9	0
5	0
5.1	0
5.2	0
5.3	0
5.4	0
5.5	0
5.6	0
5.7	0
5.8	0
5.9	0
6	0
6.1	0
6.2	0
6.3	0
6.4	0
6.5	0
6.6	0
6.7	0
6.8	0
6.9	0
7	0
7.1	0
7.2	0
7.3	0
7.4	0
7.5	0
7.6	0
7.7	0
7.8	0
7.9	0
8	0
8.1	0
8.2	0
8.3	0
8.4	0
8.5	0
8.6	0
8.7	0
8.8	0
8.9	0
9	0
9.1	0
9.2	0
9.3	0
9.4	0
9.5	0
9.6	0
9.7	0
9.8	0
9.9	0
10	0

## Sheet: Figure 3c
Simulated		FCOF-XJ-CP
5	0	5	28472.6
5.05	0	5.02	28356.8
5.1	0	5.04	27610.6
5.15	0	5.06	27758.2
5.2	0	5.08	26414
5.25	0	5.1	28336
5.3	0	5.12	27228.9
5.35	0	5.14	27642.7
5.4	0	5.16	27427.9
5.45	0	5.18	27436.3
5.5	0	5.2	27620.1
5.55	0	5.22	26827.7
5.6	0	5.24	26488.6
5.65	0	5.26	27112
5.7	0	5.28	25887.6
5.75	0	5.3	26887.4
5.8	0	5.32	28340.4
5.85	0	5.34	26672.6
5.9	0	5.36	26808.7
5.95	0	5.38	27829.6
6	0	5.4	27200.5
6.05	0	5.42	27292.7
6.1	0	5.44	26712.5
6.15	0	5.46	26799.9
6.2	0	5.48	26851.5
6.25	0	5.5	25832.1
6.3	0	5.52	26452
6.35	0	5.54	25887.4
6.4	0	5.56	26287.7
6.45	0	5.58	25115.1
6.5	0	5.6	27170.8
6.55	0	5.62	25740.4
6.6	0	5.64	26691.2
6.65	0	5.66	26857.7
6.7	0	5.68	26413.9
6.75	0	5.7	27367.8
6.8	0	5.72	26704.1
6.85	0	5.74	26493.4
6.9	0	5.76	26006.1
6.95	0	5.78	26045.6
7	0	5.8	25763
7.05	0	5.82	25795.1
7.1	0	5.84	26239.1
7.15	0	5.86	25799.1
7.2	0	5.88	26065.7
7.25	0.00309	5.9	25197.2
7.3	0.01195	5.92	27486
7.35	0.01583	5.94	26916.7
7.4	0.02196	5.96	26820.1
7.45	0.03248	5.98	26175.3
7.5	0.05283	6	25043.2
7.55	0.1004	6.02	26088.2
7.6	0.25868	6.04	25905.7
7.65	3.01112	6.06	25721.4
7.7	4.96416	6.08	25908.1
7.75	0.3561	6.1	25812.7
7.8	0.11854	6.12	25255.2
7.85	0.05951	6.14	24731.7
7.9	0.03564	6.16	26079.8
7.95	0.02369	6.18	24867.5
8	0.01688	6.2	24867.9
8.05	0.01263	6.22	24923.9
8.1	0.00583	6.24	24713.9
8.15	0	6.26	25329.5
8.2	0	6.28	24852.1
8.25	0	6.3	26153.8
8.3	0	6.32	24254.4
8.35	0	6.34	25958.4
8.4	0	6.36	25651.2
8.45	0	6.38	24752.7
8.5	0	6.4	25155.5
8.55	0	6.42	24744.1
8.6	0	6.44	24557.6
8.65	0	6.46	25249.4
8.7	0	6.48	25208.3
8.75	0	6.5	24551.8
8.8	0	6.52	25652.1
8.85	0	6.54	25361.8
8.9	0	6.56	23521.8
8.95	0	6.58	24916.6
9	0	6.6	25393.8
9.05	0	6.62	24492.8
9.1	0	6.64	26125.2
9.15	0	6.66	25572.3
9.2	0	6.68	25709.7
9.25	0	6.7	25569.9
9.3	0	6.72	26050.1
9.35	0	6.74	25055.6
9.4	0	6.76	24730.4
9.45	0	6.78	25564.5
9.5	0	6.8	24250.9
9.55	0	6.82	24690.9
9.6	0	6.84	25646
9.65	0	6.86	25833.2
9.7	0	6.88	24086.6
9.75	0	6.9	24898.9
9.8	0	6.92	24763
9.85	0	6.94	25011.3
9.9	0	6.96	24334.9
9.95	0	6.98	24432.1
10	0	7	24771
10.05	0	7.02	24817.1
10.1	0	7.04	24186.7
10.15	0	7.06	24928.9
10.2	0	7.08	24934.8
10.25	0	7.1	24831.3
10.3	0	7.12	25294.6
10.35	0	7.14	25622
10.4	0	7.16	24945.1
10.45	160.42	7.18	25230.2
10.5	308.635	7.2	24940.3
10.55	412.704	7.22	25059.6
10.6	579.847	7.24	25320.5
10.65	880.585	7.26	24858
10.7	1528.6	7.28	25337.7
10.75	3020.44	7.3	25251
10.8	9084.67	7.32	25298.3
10.85	130415	7.34	24534.3
10.9	78910.5	7.36	24927.9
10.95	7218.42	7.38	25791.5
11	3666.49	7.4	25509.1
11.05	10018.7	7.42	25959.1
11.1	39670.6	7.44	24693.9
11.15	5489.67	7.46	25367.9
11.2	1339.09	7.48	25511.1
11.25	729.994	7.5	24740.8
11.3	335.022	7.52	24921.9
11.35	162.439	7.54	25326.2
11.4	113.632	7.56	25904.5
11.45	83.9243	7.58	25919.6
11.5	57.1448	7.6	24522.7
11.55	2.42622	7.62	25527.8
11.6	0	7.64	25516
11.65	0	7.66	24569.6
11.7	0	7.68	26012.5
11.75	0	7.7	25737.2
11.8	0	7.72	25446.7
11.85	0	7.74	26007.3
11.9	0	7.76	26080.9
11.95	0	7.78	24616.7
12	0	7.8	27013
12.05	0	7.82	25219.5
12.1	0	7.84	25286.3
12.15	0	7.86	26431.1
12.2	0	7.88	24908.9
12.25	0	7.9	26359.1
12.3	0	7.92	26348.2
12.35	0	7.94	26049.5
12.4	0	7.96	24479.1
12.45	0	7.98	26118.2
12.5	0	8	26228.6
12.55	0	8.02	26140.3
12.6	0	8.04	26001.3
12.65	0	8.06	25899.6
12.7	0	8.08	25953.8
12.75	0	8.1	26653.3
12.8	0	8.12	26074.9
12.85	0	8.14	25853.7
12.9	0	8.16	25682.2
12.95	0	8.18	25932.3
13	0	8.2	24111.2
13.05	0	8.22	27000.7
13.1	0	8.24	26448.6
13.15	0	8.26	25718.1
13.2	0	8.28	26192.2
13.25	0	8.3	27869.4
13.3	0	8.32	24482
13.35	0	8.34	26069.5
13.4	0	8.36	26001.3
13.45	0	8.38	26883.3
13.5	0	8.4	25860.3
13.55	0	8.42	26128.9
13.6	0	8.44	26245.9
13.65	0	8.46	27458.5
13.7	0	8.48	28353.3
13.75	0	8.5	26762.1
13.8	0	8.52	27039.1
13.85	0	8.54	26797.2
13.9	0	8.56	26938.1
13.95	0	8.58	27764.8
14	0	8.6	27673.6
14.05	0	8.62	26705.4
14.1	0	8.64	27587.8
14.15	0	8.66	28755.4
14.2	0	8.68	27563.9
14.25	0	8.7	27334.1
14.3	0	8.72	27893.7
14.35	0	8.74	27973
14.4	0	8.76	28226.1
14.45	0	8.78	29292.5
14.5	0	8.8	29079
14.55	0	8.82	27830.1
14.6	0	8.84	29672.6
14.65	0	8.86	29332.8
14.7	0	8.88	29056.8
14.75	0	8.9	29529.6
14.8	0	8.92	29134.2
14.85	0	8.94	29690.7
14.9	0	8.96	29351.3
14.95	15.1207	8.98	30002.2
15	58.2569	9	30126
15.05	81.0959	9.02	29372.4
15.1	121.322	9.04	29184.1
15.15	273.647	9.06	30824
15.2	427.794	9.08	30359.1
15.25	697.926	9.1	30398.9
15.3	1428.68	9.12	30426.3
15.35	9691.45	9.14	30794.4
15.4	29416.5	9.16	29697.6
15.45	8588.28	9.18	30512.4
15.5	11720.3	9.2	30520.2
15.55	75092.7	9.22	30561.2
15.6	26174.9	9.24	29757.5
15.65	2784.78	9.26	31018.4
15.7	1176.36	9.28	30411.6
15.75	661.021	9.3	30923.3
15.8	422.07	9.32	31313.1
15.85	262.135	9.34	31283.3
15.9	184.223	9.36	31456.1
15.95	140.318	9.38	32158.1
16	35.7745	9.4	31853.4
16.05	0	9.42	31628.4
16.1	0	9.44	31419.3
16.15	0	9.46	32377.8
16.2	0	9.48	31643.5
16.25	0	9.5	32070.7
16.3	0	9.52	32177.7
16.35	0	9.54	32799.3
16.4	0	9.56	32861.3
16.45	0	9.58	32617.6
16.5	0	9.6	32301.1
16.55	0	9.62	33269.2
16.6	0	9.64	33743.6
16.65	0	9.66	33223.8
16.7	0	9.68	34459.6
16.75	0	9.7	35353.3
16.8	272.617	9.72	35022.7
16.85	493.497	9.74	35322.7
16.9	657.72	9.76	34628
16.95	920.19	9.78	35540.9
17	1378.58	9.8	36386.1
17.05	2291.13	9.82	35813.3
17.1	4540.67	9.84	35716.4
17.15	13796.7	9.86	36942.4
17.2	191230	9.88	37204.9
17.25	147083	9.9	36926.8
17.3	18264.7	9.92	38030.2
17.35	4707.74	9.94	37595.4
17.4	2334.04	9.96	38647.1
17.45	1395.08	9.98	38442.1
17.5	928.185	10	39625.3
17.55	662.195	10.02	40550.5
17.6	496.258	10.04	41179.9
17.65	226.389	10.06	42957.2
17.7	15.8977	10.08	43110.9
17.75	0	10.1	42580.9
17.8	0	10.12	43158.9
17.85	0	10.14	44577.7
17.9	0	10.16	47213.8
17.95	0	10.18	47418.2
18	0	10.2	48227.9
18.05	0	10.22	50131
18.1	0	10.24	50431.8
18.15	0	10.26	52486.7
18.2	0	10.28	53216.7
18.25	0	10.3	56580.3
18.3	0	10.32	58140
18.35	0	10.34	59925.6
18.4	0	10.36	65060.2
18.45	0	10.38	67217.2
18.5	0	10.4	70985.1
18.55	46.6539	10.42	75129.3
18.6	489.399	10.44	77299.2
18.65	822.973	10.46	82919.2
18.7	1106.66	10.48	89511.3
18.75	1567.56	10.5	96525
18.8	2391.82	10.52	103248
18.85	4095.22	10.54	113052
18.9	8585.32	10.56	121035
18.95	35725.2	10.58	132562
19	360000	10.6	145673
19.05	200439	10.62	160648
19.1	20732.1	10.64	180209
19.15	6511.57	10.66	197633
19.2	3411.92	10.68	218755
19.25	2183.34	10.7	242009
19.3	1709.16	10.72	269332
19.35	3108.97	10.74	289770
19.4	11327.8	10.76	321094
19.45	5450.96	10.78	341978
19.5	498.017	10.8	364754
19.55	182.302	10.82	381125
19.6	97.8165	10.84	396573
19.65	61.115	10.86	398626
19.7	41.8382	10.88	397122
19.75	30.4507	10.9	391689
19.8	23.16	10.92	379031
19.85	7.004	10.94	357955
19.9	0	10.96	329800
19.95	0	10.98	300650
20	0	11	268872
20.05	0	11.02	244915
20.1	0	11.04	214738
20.15	0	11.06	190225
20.2	0	11.08	171917
20.25	0	11.1	157853
20.3	0	11.12	145228
20.35	0	11.14	129322
20.4	0	11.16	114307
20.45	16.5203	11.18	99018.1
20.5	32.8418	11.2	83254
20.55	45.9008	11.22	74756.2
20.6	62.8094	11.24	67458.4
20.65	91.1809	11.26	60347.1
20.7	144.391	11.28	56120
20.75	263.163	11.3	55517.7
20.8	627.545	11.32	51305.9
20.85	5830.74	11.34	49583.9
20.9	12466.2	11.36	46252.9
20.95	6331.63	11.38	45536.9
21	624.921	11.4	44313.4
21.05	253.555	11.42	44715.9
21.1	139.528	11.44	42815.6
21.15	88.495	11.46	41702.1
21.2	61.193	11.48	42668.4
21.25	44.8593	11.5	41168.5
21.3	34.2225	11.52	38675.9
21.35	10.5043	11.54	40109.7
21.4	0.23428	11.56	38324.7
21.45	0.41286	11.58	39905
21.5	256.911	11.6	38257.6
21.55	518.845	11.62	38005.3
21.6	752.157	11.64	37983.7
21.65	1024.4	11.66	37805
21.7	1477.64	11.68	37529.8
21.75	2319.35	11.7	37537.9
21.8	4251.19	11.72	37937.9
21.85	9621.47	11.74	38052.4
21.9	73820.3	11.76	35178.8
21.95	231176	11.78	36015.9
22	135984	11.8	35776.3
22.05	12907.5	11.82	35874.1
22.1	4713.89	11.84	36866.5
22.15	2565.86	11.86	36757.9
22.2	1709.08	11.88	37248.6
22.25	2608.89	11.9	36042
22.3	2890.07	11.92	36185.8
22.35	1791.06	11.94	36098.8
22.4	305.467	11.96	35757.2
22.45	60.3825	11.98	35619.4
22.5	27.3607	12	37126.7
22.55	17.4379	12.02	35325.5
22.6	12.0998	12.04	36608.3
22.65	8.89315	12.06	35485.3
22.7	6.79339	12.08	35964.8
22.75	2.40826	12.1	35664.4
22.8	0.53151	12.12	34352.2
22.85	0.7064	12.14	35356.2
22.9	0.98483	12.16	35964.9
22.95	1.46879	12.18	35440
23	2.4266	12.2	34262.1
23.05	4.76996	12.22	35314.8
23.1	14.5157	12.24	35658.6
23.15	192.655	12.26	36283.3
23.2	114.512	12.28	35963.6
23.25	45.8739	12.3	35276
23.3	6.28462	12.32	35902.3
23.35	2.8769	12.34	36829
23.4	1.66256	12.36	35758.6
23.45	1.08597	12.38	36853.5
23.5	0.76594	12.4	35717.8
23.55	0.56957	12.42	35364.5
23.6	0.38418	12.44	37564.4
23.65	0.13171	12.46	35800.7
23.7	0	12.48	35766.5
23.75	0	12.5	35470.1
23.8	0	12.52	35508.2
23.85	0	12.54	36096.8
23.9	0	12.56	36954.9
23.95	0	12.58	36927.3
24	28.3999	12.6	35966.2
24.05	47.838	12.62	35370.5
24.1	182.733	12.64	36370.6
24.15	289.424	12.66	37500.8
24.2	419.987	12.68	37440.8
24.25	598.721	12.7	36817.2
24.3	936.032	12.72	37773.6
24.35	1747.65	12.74	36296.7
24.4	8873.17	12.76	36546.5
24.45	22342.8	12.78	36811.1
24.5	39082.3	12.8	36726.9
24.55	89805.8	12.82	36912.6
24.6	58679	12.84	37682.4
24.65	6991.22	12.86	36011.1
24.7	2197.44	12.88	36730.4
24.75	1277.2	12.9	38214.8
24.8	1526.65	12.92	37850.9
24.85	5420.1	12.94	37406.4
24.9	3090.41	12.96	37967.8
24.95	713.656	12.98	37237.8
25	199.803	13	38065
25.05	84.4299	13.02	38378.1
25.1	32.5283	13.04	37374.7
25.15	21.8316	13.06	37870
25.2	15.6859	13.08	38073.7
25.25	11.8229	13.1	37270.5
25.3	5.83467	13.12	37271.9
25.35	2.2634	13.14	37175.4
25.4	0	13.16	39609.2
25.45	0	13.18	39368.4
25.5	0	13.2	37547.3
25.55	0	13.22	39666.2
25.6	29.0772	13.24	37777.9
25.65	46.9314	13.26	39094.3
25.7	68.4213	13.28	38791.4
25.75	92.7624	13.3	39100.1
25.8	132.97	13.32	38718.4
25.85	206.713	13.34	39311.5
25.9	365.675	13.36	38154
25.95	821.26	13.38	38776.2
26	5781.69	13.4	39841.4
26.05	21617.6	13.42	40234.5
26.1	13698.6	13.44	40707.4
26.15	2082.59	13.46	39854.6
26.2	512.163	13.48	40696.7
26.25	259.99	13.5	40592.3
26.3	158.313	13.52	41435
26.35	106.833	13.54	40365.2
26.4	77.0592	13.56	39704.8
26.45	58.2527	13.58	41202.1
26.5	27.5521	13.6	40810.3
26.55	11.7924	13.62	41566.9
26.6	0	13.64	39915.8
26.65	0	13.66	41380.6
26.7	0	13.68	41398.3
26.75	0	13.7	42274.6
26.8	0	13.72	40136.6
26.85	0	13.74	40807.1
26.9	0	13.76	41210.1
26.95	0	13.78	41172.1
27	0	13.8	40663.3
27.05	0	13.82	42564.9
27.1	0	13.84	41448.2
27.15	0	13.86	41999.1
27.2	0	13.88	41690.1
27.25	0	13.9	42344.8
27.3	0	13.92	41990.5
27.35	0	13.94	42229
27.4	0	13.96	42382
27.45	0.89135	13.98	43329.3
27.5	5.46183	14	41644.7
27.55	9.4141	14.02	42807.9
27.6	12.4917	14.04	43342.9
27.65	17.1698	14.06	43974.5
27.7	25.0999	14.08	43642.8
27.75	40.2206	14.1	44447.9
27.8	74.988	14.12	45166.1
27.85	192.08	14.14	45210.4
27.9	2211.14	14.16	43701.5
27.95	2135.49	14.18	44243.9
28	2110.84	14.2	44332.2
28.05	222.958	14.22	43968.4
28.1	72.489	14.24	45835.2
28.15	38.6272	14.26	45448.4
28.2	24.1585	14.28	45072.5
28.25	16.586	14.3	46695.6
28.3	12.1093	14.32	45486.6
28.35	9.23699	14.34	47147.1
28.4	3.49958	14.36	45571.8
28.45	1.71143	14.38	46482.6
28.5	0	14.4	47978.2
28.55	0	14.42	47599.3
28.6	0.71522	14.44	45501.9
28.65	63.036	14.46	45527.4
28.7	99.4476	14.48	47492.8
28.75	141.27	14.5	47899.9
28.8	191.314	14.52	46934.1
28.85	273.873	14.54	48295.8
28.9	433.003	14.56	47918.9
28.95	762.293	14.58	48674.9
29	1700.95	14.6	49823.2
29.05	12027	14.62	49397
29.1	43030	14.64	48767.8
29.15	23874.1	14.66	49828.2
29.2	6780.72	14.68	49927.2
29.25	1366.99	14.7	50097.2
29.3	1389.57	14.72	51313.3
29.35	7471.95	14.74	52701.1
29.4	2754.69	14.76	53628.2
29.45	2074.84	14.78	51234.2
29.5	361.227	14.8	53512.9
29.55	203.622	14.82	52145.3
29.6	133.756	14.84	53481.8
29.65	121.3	14.86	55438
29.7	222.74	14.88	55733.3
29.75	1693.96	14.9	57491
29.8	3998.48	14.92	57254.5
29.85	2644.09	14.94	58678
29.9	621.598	14.96	59403.2
29.95	123.164	14.98	59932.8
30	64.8932	15	61314.2
30.05	43.2569	15.02	63018
30.1	34.2101	15.04	64086.9
30.15	31.9807	15.06	66421.4
30.2	36.1576	15.08	67568.3
30.25	49.6724	15.1	68845
30.3	102.252	15.12	71789.1
30.35	915.004	15.14	74762.2
30.4	1717.01	15.16	74038.4
30.45	1255.08	15.18	78521.6
30.5	279.555	15.2	83745.9
30.55	55.6051	15.22	87852.6
30.6	38.8316	15.24	93103.5
30.65	37.6754	15.26	95683.9
30.7	59.785	15.28	102521
30.75	80.4517	15.3	109818
30.8	105.94	15.32	116214
30.85	146.466	15.34	123241
30.9	230.628	15.36	136828
30.95	428	15.38	143795
31	1392.13	15.4	155646
31.05	9917.21	15.42	169013
31.1	8649.42	15.44	182298
31.15	16827.1	15.46	196765
31.2	8693.2	15.48	208286
31.25	3023.65	15.5	221336
31.3	1091.41	15.52	232021
31.35	5647.63	15.54	238103
31.4	9929.26	15.56	243246
31.45	6963.78	15.58	246751
31.5	1942.79	15.6	237584
31.55	397.361	15.62	226574
31.6	219.401	15.64	218258
31.65	146.421	15.66	201527
31.7	136.172	15.68	180740
31.75	427.994	15.7	166004
31.8	1360.22	15.72	153955
31.85	643.599	15.74	139308
31.9	417.658	15.76	126161
31.95	271.03	15.78	118058
32	2078.29	15.8	108216
32.05	4122.57	15.82	101025
32.1	2593.52	15.84	98559.9
32.15	890.351	15.86	90716.7
32.2	146.467	15.88	89229.1
32.25	71.7598	15.9	85011.7
32.3	42.1278	15.92	79885.2
32.35	27.8519	15.94	80806.1
32.4	19.7173	15.96	78059.2
32.45	14.8564	15.98	76157.1
32.5	10.3991	16	75091.1
32.55	4.01837	16.02	73759.6
32.6	1.22402	16.04	72443.1
32.65	0.36636	16.06	71535.3
32.7	0.49617	16.08	70721.3
32.75	0.71057	16.1	70747.8
32.8	1.10411	16.12	70851.7
32.85	1.95471	16.14	69162.9
32.9	4.42217	16.16	70064.8
32.95	33.8106	16.18	68929.8
33	101.471	16.2	69300.8
33.05	44.7572	16.22	70666.7
33.1	27.7762	16.24	68509.7
33.15	3.50795	16.26	68955.3
33.2	2.87565	16.28	69242.3
33.25	4.08354	16.3	69324.8
33.3	5.79609	16.32	70118.2
33.35	7.40079	16.34	70655
33.4	9.75724	16.36	71166.8
33.45	13.7543	16.38	70749.6
33.5	21.0726	16.4	72950.5
33.55	37.2228	16.42	73050.7
33.6	84.2895	16.44	71620.9
33.65	652.484	16.46	73281.5
33.7	1893	16.48	74295.3
33.75	813.883	16.5	75980.4
33.8	591.159	16.52	75085.6
33.85	107.559	16.54	78932.7
33.9	82.0319	16.56	79884.1
33.95	88.1969	16.58	78198.6
34	114.371	16.6	80169.1
34.05	172.548	16.62	82026.4
34.1	312.239	16.64	83223.6
34.15	806.026	16.66	83917.5
34.2	8963.02	16.68	83008.8
34.25	7677.85	16.7	89043.9
34.3	7380.45	16.72	90318.1
34.35	2045.44	16.74	93937.4
34.4	369.211	16.76	95990.6
34.45	193.55	16.78	98152.7
34.5	128.096	16.8	102467
34.55	100.705	16.82	104107
34.6	90.7874	16.84	108964
34.65	96.1483	16.86	114240
34.7	120.931	16.88	120028
34.75	204.257	16.9	124812
34.8	1348.56	16.92	129491
34.85	2148.77	16.94	137730
34.9	6911.81	16.96	143028
34.95	1888.75	16.98	152122
35	2849.39	17	160410
35.05	341.153	17.02	170635
35.1	131.478	17.04	177378
35.15	83.7307	17.06	186164
35.2	65.8034	17.08	194393
35.25	62.146	17.1	204788
35.3	70.6757	17.12	214459
35.35	98.0484	17.14	221999
35.4	184.748	17.16	227777
35.45	1041.02	17.18	235339
35.5	5336.86	17.2	237946
35.55	1362.62	17.22	241112
35.6	2269.64	17.24	243218
35.65	236.244	17.26	248656
35.7	88.5868	17.28	242631
35.75	49.3604	17.3	241796
35.8	31.7537	17.32	240417
35.85	22.2385	17.34	233841
35.9	16.4803	17.36	225535
35.95	12.7184	17.38	216219
36	5.49311	17.4	209840
36.05	3.44007	17.42	200429
36.1	0.11296	17.44	190667
36.15	4.54011	17.46	182157
36.2	17.057	17.48	173884
36.25	25.0452	17.5	166042
36.3	36.6553	17.52	155584
36.35	49.1511	17.54	147552
36.4	79.8316	17.56	141439
36.45	117.25	17.58	133969
36.5	194.503	17.6	130822
36.55	372.202	17.62	123779
36.6	1341.25	17.64	120166
36.65	12365.4	17.66	116350
36.7	3477.28	17.68	113439
36.75	6961.37	17.7	111515
36.8	1641.14	17.72	109066
36.85	6315.74	17.74	106292
36.9	4535.31	17.76	104078
36.95	4065.28	17.78	100530
37	1813.94	17.8	100529
37.05	351.669	17.82	99364.1
37.1	259.068	17.84	99810.7
37.15	365.153	17.86	98291.4
37.2	2904.2	17.88	98460.9
37.25	3085.99	17.9	97315.9
37.3	1952.45	17.92	95202.7
37.35	1322.27	17.94	95545.8
37.4	181.658	17.96	94802.2
37.45	96.8768	17.98	93533.6
37.5	70.1731	18	95126.6
37.55	72.5325	18.02	93115.8
37.6	104.122	18.04	93558.7
37.65	258.438	18.06	93148.4
37.7	2708.45	18.08	92870.1
37.75	1525.08	18.1	94471.3
37.8	1599.54	18.12	95424.4
37.85	662.87	18.14	94678.8
37.9	99.0967	18.16	94467.7
37.95	47.9892	18.18	95978.9
38	29.2708	18.2	95663.3
38.05	21.8664	18.22	96416.4
38.1	17.9783	18.24	96455.5
38.15	17.1159	18.26	96012.6
38.2	18.3293	18.28	98100.5
38.25	20.8609	18.3	98945.9
38.3	83.0988	18.32	99258.6
38.35	317.452	18.34	99639
38.4	92.2258	18.36	103602
38.45	206.31	18.38	102786
38.5	288.032	18.4	104430
38.55	1704.37	18.42	104522
38.6	362.04	18.44	109294
38.65	884.373	18.46	110543
38.7	135.873	18.48	112153
38.75	40.2454	18.5	118252
38.8	25.8861	18.52	120283
38.85	21.9786	18.54	122105
38.9	23.7805	18.56	125430
38.95	32.9727	18.58	127798
39	62.3967	18.6	133436
39.05	346.936	18.62	136086
39.1	1654.24	18.64	143813
39.15	341.736	18.66	151187
39.2	866.532	18.68	156748
39.25	121.765	18.7	164062
39.3	47.4175	18.72	175515
39.35	171.384	18.74	185793
39.4	82.506	18.76	198517
39.45	93.1238	18.78	214486
39.5	53.2162	18.8	229002
39.55	24.6491	18.82	251440
39.6	25.7881	18.84	273632
39.65	31.1387	18.86	293907
39.7	44.184	18.88	318798
39.75	71.2939	18.9	348384
39.8	142.45	18.92	372808
39.85	636.646	18.94	400391
39.9	4349.09	18.96	425393
39.95	1644.67	18.98	441661
40	2601	19	468722
	--	19.02	483909
		19.04	489367
		19.06	496446
		19.08	500393
		19.1	483833
		19.12	466895
		19.14	450559
		19.16	424843
		19.18	391429
		19.2	360543
		19.22	332534
		19.24	296424
		19.26	274096
		19.28	245152
		19.3	231048
		19.32	210191
		19.34	194701
		19.36	182988
		19.38	175178
		19.4	167857
		19.42	158522
		19.44	154668
		19.46	148757
		19.48	143909
		19.5	138558
		19.52	134767
		19.54	129918
		19.56	124786
		19.58	125285
		19.6	119305
		19.62	115624
		19.64	114654
		19.66	112456
		19.68	108624
		19.7	105854
		19.72	106818
		19.74	104662
		19.76	103644
		19.78	102510
		19.8	100914
		19.82	99509.7
		19.84	99516.4
		19.86	100110
		19.88	98212.6
		19.9	97498.1
		19.92	96884.5
		19.94	94063.7
		19.96	93144.6
		19.98	97244.4
		20	95352.2
		20.02	94752.2
		20.04	94292.5
		20.06	95441.8
		20.08	94685.3
		20.1	93304.3
		20.12	92026.2
		20.14	91878.3
		20.16	92873.4
		20.18	91979.9
		20.2	90935.2
		20.22	91080.9
		20.24	92110.8
		20.26	90544.3
		20.28	90420.4
		20.3	92734.8
		20.32	92036.2
		20.34	92524.5
		20.36	90012.4
		20.38	91248.7
		20.4	91259.8
		20.42	91933
		20.44	92573.8
		20.46	92327.9
		20.48	92003.2
		20.5	91979
		20.52	91688.7
		20.54	92136.5
		20.56	92769.1
		20.58	91109.5
		20.6	91198.5
		20.62	91123.4
		20.64	93523.4
		20.66	94613.8
		20.68	94374.7
		20.7	96036.2
		20.72	96613
		20.74	97218.2
		20.76	98370.9
		20.78	98167.8
		20.8	102653
		20.82	104842
		20.84	106543
		20.86	109032
		20.88	112672
		20.9	111039
		20.92	112373
		20.94	115759
		20.96	115043
		20.98	114899
		21	115386
		21.02	116008
		21.04	114394
		21.06	111792
		21.08	113413
		21.1	113777
		21.12	112126
		21.14	112631
		21.16	113162
		21.18	113144
		21.2	113312
		21.22	116074
		21.24	115707
		21.26	119575
		21.28	121508
		21.3	122631
		21.32	123408
		21.34	124677
		21.36	128012
		21.38	133064
		21.4	135216
		21.42	137264
		21.44	138987
		21.46	143773
		21.48	147211
		21.5	151774
		21.52	154364
		21.54	160130
		21.56	168861
		21.58	173911
		21.6	177207
		21.62	183603
		21.64	194495
		21.66	199056
		21.68	207672
		21.7	218368
		21.72	226173
		21.74	238941
		21.76	250317
		21.78	258815
		21.8	270237
		21.82	279448
		21.84	292315
		21.86	300657
		21.88	309541
		21.9	319420
		21.92	328836
		21.94	329792
		21.96	333422
		21.98	337894
		22	334712
		22.02	333315
		22.04	327383
		22.06	320936
		22.08	311098
		22.1	303247
		22.12	289696
		22.14	278025
		22.16	266462
		22.18	257251
		22.2	245876
		22.22	234322
		22.24	219968
		22.26	211814
		22.28	199623
		22.3	192860
		22.32	184013
		22.34	175980
		22.36	169924
		22.38	161740
		22.4	157190
		22.42	151650
		22.44	144678
		22.46	139735
		22.48	133297
		22.5	131713
		22.52	127145
		22.54	124005
		22.56	120354
		22.58	116024
		22.6	114707
		22.62	110835
		22.64	110363
		22.66	109657
		22.68	108394
		22.7	108771
		22.72	107960
		22.74	105806
		22.76	103074
		22.78	99279.2
		22.8	99171.8
		22.82	95390.8
		22.84	93994.6
		22.86	91941.2
		22.88	92048
		22.9	89935.4
		22.92	90236.4
		22.94	90050.2
		22.96	88316.3
		22.98	87003
		23	86373.6
		23.02	84140.2
		23.04	84653.5
		23.06	83372.4
		23.08	83961
		23.1	84105.1
		23.12	83091.7
		23.14	83062.1
		23.16	81991.9
		23.18	80413.1
		23.2	80225
		23.22	78128.8
		23.24	82504.6
		23.26	80673.7
		23.28	80189.3
		23.3	77643.7
		23.32	78078
		23.34	76391.1
		23.36	77800.6
		23.38	77449.4
		23.4	77171.9
		23.42	76782.4
		23.44	75443.4
		23.46	76250.3
		23.48	75527.5
		23.5	75052.5
		23.52	76466.5
		23.54	76629.3
		23.56	72889.5
		23.58	75288.5
		23.6	72882.3
		23.62	73534.7
		23.64	74752.7
		23.66	74595.3
		23.68	75024.9
		23.7	73566.9
		23.72	74347.5
		23.74	72422.7
		23.76	73346
		23.78	72822.6
		23.8	73343.6
		23.82	74889.8
		23.84	73177.2
		23.86	74473.9
		23.88	75060.1
		23.9	76266.4
		23.92	74673
		23.94	74984.7
		23.96	76156.9
		23.98	74953.1
		24	75743.3
		24.02	77273.2
		24.04	78499.3
		24.06	79017.1
		24.08	77686.3
		24.1	79620.5
		24.12	81655
		24.14	81781.2
		24.16	84412.5
		24.18	85072.9
		24.2	86440.7
		24.22	88606.9
		24.24	90377.6
		24.26	92137.5
		24.28	92737.7
		24.3	96538.9
		24.32	97019.9
		24.34	99079.3
		24.36	104813
		24.38	107225
		24.4	109469
		24.42	112135
		24.44	115026
		24.46	122267
		24.48	121844
		24.5	124520
		24.52	129876
		24.54	131227
		24.56	130238
		24.58	134342
		24.6	134670
		24.62	136421
		24.64	137297
		24.66	137851
		24.68	136761
		24.7	134257
		24.72	133573
		24.74	131271
		24.76	129109
		24.78	126467
		24.8	122690
		24.82	118760
		24.84	115390
		24.86	113633
		24.88	110662
		24.9	104077
		24.92	101241
		24.94	101448
		24.96	96343.3
		24.98	90838.3
		25	89529.2
		25.02	87490.8
		25.04	84154.6
		25.06	81830.6
		25.08	80296
		25.1	78945.9
		25.12	76765
		25.14	75120.5
		25.16	75596.6
		25.18	72069.8
		25.2	71660.1
		25.22	71604
		25.24	71045.1
		25.26	69069
		25.28	69059.1
		25.3	66962.8
		25.32	67131.8
		25.34	66289.3
		25.36	65090.9
		25.38	66778.1
		25.4	65434.3
		25.42	64136.2
		25.44	63315.4
		25.46	63463
		25.48	63705.9
		25.5	63626.7
		25.52	63039
		25.54	62940.7
		25.56	61404.6
		25.58	62111.8
		25.6	60475.5
		25.62	61355
		25.64	61763.2
		25.66	60445.3
		25.68	61209.3
		25.7	63015.8
		25.72	61510.2
		25.74	60539.7
		25.76	60026
		25.78	60990.6
		25.8	61425
		25.82	60356.6
		25.84	61224.8
		25.86	61745.1
		25.88	59358.2
		25.9	61357.3
		25.92	62959.6
		25.94	63939.7
		25.96	62952
		25.98	66337.6
		26	66197.4
		26.02	68670
		26.04	68175.2
		26.06	69699
		26.08	70766.7
		26.1	72011
		26.12	72798.1
		26.14	72712.5
		26.16	74083.2
		26.18	70265.9
		26.2	71768.7
		26.22	69205
		26.24	66406.9
		26.26	65252.9
		26.28	65087.8
		26.3	63237
		26.32	62427
		26.34	59940.5
		26.36	60052
		26.38	60203.6
		26.4	58764.4
		26.42	58741.7
		26.44	56507.5
		26.46	57226.1
		26.48	57032.2
		26.5	55673
		26.52	55612.6
		26.54	56084.1
		26.56	56824.6
		26.58	57344.2
		26.6	56247.8
		26.62	56389.3
		26.64	60954
		26.66	73955.1
		26.68	67514.9
		26.7	57945.2
		26.72	59257.4
		26.74	61974.3
		26.76	54424
		26.78	53387.2
		26.8	52248.4
		26.82	51673.5
		26.84	52085.7
		26.86	51813.8
		26.88	52051.6
		26.9	52134
		26.92	51922.7
		26.94	50700.6
		26.96	52361.8
		26.98	51459.4
		27	51019.1
		27.02	49806.2
		27.04	50093.9
		27.06	51379.4
		27.08	49612.2
		27.1	50973.7
		27.12	50170.7
		27.14	50356.9
		27.16	50001.5
		27.18	49516.5
		27.2	49504.6
		27.22	50857.6
		27.24	49862.2
		27.26	50317.3
		27.28	51868.1
		27.3	50754.6
		27.32	49652.5
		27.34	49167.1
		27.36	49228.5
		27.38	48264.3
		27.4	50105.1
		27.42	48662.1
		27.44	49099.4
		27.46	48932.1
		27.48	48204.6
		27.5	48046.3
		27.52	50272
		27.54	49360
		27.56	48382.5
		27.58	48911.2
		27.6	49587.3
		27.62	48564.7
		27.64	48269.9
		27.66	48496.9
		27.68	50116.1
		27.7	47193.3
		27.72	48868.4
		27.74	47551.8
		27.76	49570.2
		27.78	48180.3
		27.8	48734.2
		27.82	49432.9
		27.84	48165.8
		27.86	47660.9
		27.88	48503.6
		27.9	48606.4
		27.92	49292.3
		27.94	48720.9
		27.96	48448.6
		27.98	48841.5
		28	48762.9
		28.02	47470
		28.04	48847.1
		28.06	47056.1
		28.08	48409.5
		28.1	48867.3
		28.12	49828
		28.14	48705.8
		28.16	48331.5
		28.18	48233
		28.2	48948.4
		28.22	48342.4
		28.24	49402.2
		28.26	49089.1
		28.28	48079.8
		28.3	47402.1
		28.32	49316.4
		28.34	51359
		28.36	49207.9
		28.38	49671.1
		28.4	48875.8
		28.42	48804.9
		28.44	50286.2
		28.46	49495.8
		28.48	49696.8
		28.5	49640.9
		28.52	49398.5
		28.54	50437.5
		28.56	50680.8
		28.58	50449.8
		28.6	50202.5
		28.62	51654.5
		28.64	51385.5
		28.66	51285.2
		28.68	51895
		28.7	51428.3
		28.72	52916.1
		28.74	51553.4
		28.76	52836
		28.78	53238.1
		28.8	52147.3
		28.82	53225.4
		28.84	54359.3
		28.86	53098.3
		28.88	55701.9
		28.9	55428.1
		28.92	55549.3
		28.94	55223.1
		28.96	56481
		28.98	56582.1
		29	57083.4
		29.02	56434.5
		29.04	56474.8
		29.06	59455.9
		29.08	58206.5
		29.1	59250.5
		29.12	59911.3
		29.14	58987.4
		29.16	59795.5
		29.18	60440.4
		29.2	59706.5
		29.22	58696.6
		29.24	60303.2
		29.26	60247.4
		29.28	58799.2
		29.3	59154.8
		29.32	58992.8
		29.34	59029
		29.36	59376.5
		29.38	58655.6
		29.4	58570
		29.42	57347.9
		29.44	58523.4
		29.46	56574.4
		29.48	56298.4
		29.5	55356.2
		29.52	55647.4
		29.54	54822.4
		29.56	53684.1
		29.58	53218.6
		29.6	52876.9
		29.62	52164.8
		29.64	53160.7
		29.66	50989.9
		29.68	50845.8
		29.7	51824.3
		29.72	50649.8
		29.74	49998.6
		29.76	50445.4
		29.78	51497.1
		29.8	50827.1
		29.82	49329.8
		29.84	49670.9
		29.86	48780.1
		29.88	49347.7
		29.9	48223.3
		29.92	49282.8
		29.94	46730.4
		29.96	47885.4
		29.98	46966.3
		30	47864.5
		30.02	47073.2
		30.04	47959.9
		30.06	46905.7
		30.08	46488.3
		30.1	46639
		30.12	45357.3
		30.14	45175.7
		30.16	45476.2
		30.18	44106.5
		30.2	44946
		30.22	44252.3
		30.24	45024.5
		30.26	45790.8
		30.28	43811.6
		30.3	43686.3
		30.32	43403.4
		30.34	44396.4
		30.36	43397.3
		30.38	44072.1
		30.4	42645.2
		30.42	43450
		30.44	43390.4
		30.46	43108.6
		30.48	42848.7
		30.5	43462.1
		30.52	42220
		30.54	42680
		30.56	44145.6
		30.58	41756.3
		30.6	43112.2
		30.62	43189.8
		30.64	43721.7
		30.66	44315.5
		30.68	41845.5
		30.7	43616.9
		30.72	42954.1
		30.74	42482.1
		30.76	43103.9
		30.78	42941.6
		30.8	42949.2
		30.82	42838.4
		30.84	43580.5
		30.86	44502.9
		30.88	43137.6
		30.9	44607.7
		30.92	43512.1
		30.94	44563.1
		30.96	44002.9
		30.98	44675
		31	44648.8
		31.02	45511.1
		31.04	46265.5
		31.06	46090.1
		31.08	45315.5
		31.1	47320.5
		31.12	46484
		31.14	47287.5
		31.16	47281.6
		31.18	46130.2
		31.2	47657.8
		31.22	47933.5
		31.24	47474.6
		31.26	49541.8
		31.28	48605.7
		31.3	48007.3
		31.32	49159.8
		31.34	48931.2
		31.36	48811.7
		31.38	48974.4
		31.4	49390.8
		31.42	47958.6
		31.44	49028.9
		31.46	48427.7
		31.48	48691.9
		31.5	49308.2
		31.52	50498.9
		31.54	49672.6
		31.56	50015.9
		31.58	48977.7
		31.6	48123.8
		31.62	49919.1
		31.64	45919.7
		31.66	47873.7
		31.68	46327.1
		31.7	45630.3
		31.72	45766.4
		31.74	43870.7
		31.76	44080.4
		31.78	45040.7
		31.8	42195.8
		31.82	42127.3
		31.84	42150.9
		31.86	41408.3
		31.88	41382.7
		31.9	40889.1
		31.92	41228.6
		31.94	39111.6
		31.96	39528.3
		31.98	40393
		32	39477.3
		32.02	40422.6
		32.04	39282.6
		32.06	39797.2
		32.08	38569.5
		32.1	37733.6
		32.12	37273.7
		32.14	39679
		32.16	38288.6
		32.18	38463.5
		32.2	38515.5
		32.22	38085
		32.24	36683.9
		32.26	36495.3
		32.28	36424.6
		32.3	36577
		32.32	36468.5
		32.34	36972.6
		32.36	35801.4
		32.38	36257.3
		32.4	36114.8
		32.42	34950.8
		32.44	35114.4
		32.46	35848.9
		32.48	35462.8
		32.5	35351.6
		32.52	35094.5
		32.54	35147.5
		32.56	35117
		32.58	34796.9
		32.6	34461
		32.62	34101.1
		32.64	35431.7
		32.66	34297.4
		32.68	34759.4
		32.7	33231.1
		32.72	33926.1
		32.74	35574.5
		32.76	34624.2
		32.78	32861.7
		32.8	32321
		32.82	33449.7
		32.84	34209.8
		32.86	33926.3
		32.88	33505
		32.9	33907.8
		32.92	33374
		32.94	33816.6
		32.96	33944.9
		32.98	33824.3
		33	33423
		33.02	32669.6
		33.04	32911.8
		33.06	32293.4
		33.08	32402.2
		33.1	32368.3
		33.12	31879.5
		33.14	32935.8
		33.16	31585.9
		33.18	33186.5
		33.2	32832.9
		33.22	32581.8
		33.24	31354.6
		33.26	31428.2
		33.28	32151.8
		33.3	31768.9
		33.32	32916.3
		33.34	33082
		33.36	32429.2
		33.38	32183.7
		33.4	31873.1
		33.42	31675.8
		33.44	31750.7
		33.46	31567.5
		33.48	31762.2
		33.5	32345.5
		33.52	31253
		33.54	31541.7
		33.56	31608.1
		33.58	32734.2
		33.6	32405.1
		33.62	32253.4
		33.64	32706.1
		33.66	32391.2
		33.68	31825.7
		33.7	32410.6
		33.72	32421.4
		33.74	32375.4
		33.76	32362.9
		33.78	33317.1
		33.8	32824.9
		33.82	33586.3
		33.84	34076.8
		33.86	33807.9
		33.88	33692
		33.9	32999.9
		33.92	33485.4
		33.94	33722.9
		33.96	32977.1
		33.98	33808.8
		34	33265.8
		34.02	33410.1
		34.04	34369.1
		34.06	32656.3
		34.08	33151.1
		34.1	34117.8
		34.12	34854.5
		34.14	34749.3
		34.16	35085.8
		34.18	35020.5
		34.2	36741
		34.22	36811.4
		34.24	37185.1
		34.26	37840.5
		34.28	38621.3
		34.3	38251.2
		34.32	38304.5
		34.34	39916.5
		34.36	40027.7
		34.38	39490.2
		34.4	39603.3
		34.42	40482
		34.44	39970.7
		34.46	38977.8
		34.48	39212.7
		34.5	39228.9
		34.52	39444
		34.54	37995.4
		34.56	37010.1
		34.58	37178.9
		34.6	36995.5
		34.62	38105.7
		34.64	36776.8
		34.66	35566.2
		34.68	35655.3
		34.7	34942.6
		34.72	34520.9
		34.74	34610.2
		34.76	33172.9
		34.78	34259
		34.8	33423
		34.82	33172.4
		34.84	33940.5
		34.86	32316.8
		34.88	31438.1
		34.9	32595.4
		34.92	31254.9
		34.94	31826.7
		34.96	31486.4
		34.98	31127
		35	32204.8
		35.02	31364.4
		35.04	32181
		35.06	30971.5
		35.08	30806.2
		35.1	31011
		35.12	32132.2
		35.14	31791.5
		35.16	30473.2
		35.18	31607.7
		35.2	31494
		35.22	30260.1
		35.24	29609.4
		35.26	30132.2
		35.28	30379
		35.3	30362.9
		35.32	30290.4
		35.34	30311.4
		35.36	28962
		35.38	29450.2
		35.4	29054.3
		35.42	29729
		35.44	30165.9
		35.46	30166.5
		35.48	28837.7
		35.5	28844.9
		35.52	29853.6
		35.54	29748.7
		35.56	28759.3
		35.58	29538.7
		35.6	29268.6
		35.62	29640.1
		35.64	29618.9
		35.66	29517.2
		35.68	28665
		35.7	29043.4
		35.72	29701.7
		35.74	28617.3
		35.76	29307.9
		35.78	28395.7
		35.8	29181.8
		35.82	28904
		35.84	28867.6
		35.86	27536.1
		35.88	28674.8
		35.9	29215.4
		35.92	27735.8
		35.94	29013.5
		35.96	27131.6
		35.98	27872.9
		36	27770.4
		36.02	28362.7
		36.04	27629.7
		36.06	27179.1
		36.08	27198.1
		36.1	27467.6
		36.12	28693.4
		36.14	27230.8
		36.16	27602
		36.18	26309.3
		36.2	27286.2
		36.22	26736.3
		36.24	26820.5
		36.26	26607.3
		36.28	27052.8
		36.3	26917
		36.32	26692.5
		36.34	27190.8
		36.36	27010.7
		36.38	26942.2
		36.4	27947.8
		36.42	26846.1
		36.44	26733.8
		36.46	28057.4
		36.48	26808.9
		36.5	28075.9
		36.52	27389.5
		36.54	26693.2
		36.56	27738.3
		36.58	26943.1
		36.6	27857.7
		36.62	26149.9
		36.64	27150.3
		36.66	27193.9
		36.68	26598.7
		36.7	28821
		36.72	25831.3
		36.74	26730.3
		36.76	27455.2
		36.78	26917
		36.8	27915.7
		36.82	27511.8
		36.84	28280.3
		36.86	26937.2
		36.88	27553.1
		36.9	27981.2
		36.92	27952
		36.94	27852.1
		36.96	27459.9
		36.98	28751.8
		37	27512.3
		37.02	27838.4
		37.04	28003.7
		37.06	27639.1
		37.08	26607.3
		37.1	27570.7
		37.12	27790.2
		37.14	27856.6
		37.16	27812.1
		37.18	28061.9
		37.2	28524.2
		37.22	27528.6
		37.24	28252.1
		37.26	27412.6
		37.28	28724.9
		37.3	28194.4
		37.32	28436.6
		37.34	28386.3
		37.36	28158.6
		37.38	28874.8
		37.4	28887
		37.42	27612.2
		37.44	28245.4
		37.46	28127.3
		37.48	28037
		37.5	28404.8
		37.52	29110.8
		37.54	28443.6
		37.56	28311.8
		37.58	27373.5
		37.6	27151.5
		37.62	27186.4
		37.64	27197.7
		37.66	27850
		37.68	27921.4
		37.7	26592.5
		37.72	27974.6
		37.74	27786.5
		37.76	28708.8
		37.78	26995.3
		37.8	27473
		37.82	27225.7
		37.84	27123
		37.86	27513.3
		37.88	26555.3
		37.9	27811.2
		37.92	27857.8
		37.94	26969.8
		37.96	26882.8
		37.98	25436.9
		38	26464.8
		38.02	26027.1
		38.04	25872.4
		38.06	26634.4
		38.08	26861.1
		38.1	26600.4
		38.12	26398.5
		38.14	26463.2
		38.16	26038.8
		38.18	26591
		38.2	26420.2
		38.22	26345.5
		38.24	26193.7
		38.26	26079.6
		38.28	26112.4
		38.3	26892.1
		38.32	26403.3
		38.34	26306
		38.36	25790
		38.38	26231.5
		38.4	25897.3
		38.42	25796.9
		38.44	25912
		38.46	25614.5
		38.48	26472.1
		38.5	26261.1
		38.52	26590.2
		38.54	24963
		38.56	25854.3
		38.58	25711.9
		38.6	26290.9
		38.62	25391.8
		38.64	26969.2
		38.66	25045.8
		38.68	25637.1
		38.7	26855.7
		38.72	25982.4
		38.74	25893.8
		38.76	26158.4
		38.78	25714.5
		38.8	24836.7
		38.82	26333.9
		38.84	26385.2
		38.86	25658.2
		38.88	25234.1
		38.9	26169
		38.92	25384.9
		38.94	25169.1
		38.96	25516.9
		38.98	25959.6
		39	25781.2
		39.02	25525.8
		39.04	26198.9
		39.06	25960.7
		39.08	25576.9
		39.1	25847.6
		39.12	26623.6
		39.14	25548.8
		39.16	25359
		39.18	25527.8
		39.2	25743
		39.22	25834.8
		39.24	26597.1
		39.26	25746.4
		39.28	25374.8
		39.3	26308
		39.32	25338.6
		39.34	25371.6
		39.36	25597.4
		39.38	26314.6
		39.4	26231.6
		39.42	25976.1
		39.44	25608.3
		39.46	25720.9
		39.48	25597.8
		39.5	25959.1
		39.52	25902.9
		39.54	25708.8
		39.56	25714.4
		39.58	26497.2
		39.6	27047.3
		39.62	26108.8
		39.64	27062.9
		39.66	26404.8
		39.68	26187.2
		39.7	26444.5
		39.72	26467.7
		39.74	25435.9
		39.76	26914.8
		39.78	26261.5
		39.8	26332.2
		39.82	27216.7
		39.84	26532.9
		39.86	26777.4
		39.88	27970.3
		39.9	26821.5
		39.92	27214.6
		39.94	27296.1
		39.96	26718.9
		39.98	27484.9
		40	27153.9

## Sheet: Figure 3e
0	0
0.1	0
0.2	0
0.3	0
0.4	0
0.5	0
0.6	0
0.7	0
0.8	0
0.9	0
1	0
1.1	0
1.2	0
1.3	0
1.4	0
1.5	0
1.6	0
1.7	0
1.8	0
1.9	0
2	0
2.1	0
2.2	0
2.3	0
2.4	0
2.5	0
2.6	0
2.7	0
2.8	0
2.9	0
3	0
3.1	0
3.2	0
3.3	0
3.4	0
3.5	0.00337
3.6	0.0059
3.7	0.02951
3.8	0.07926
3.9	3.09211
4	3.03983
4.1	0
4.2	0
4.3	0
4.4	0
4.5	0
4.6	0
4.7	0
4.8	0
4.9	0
5	0
5.1	0
5.2	0
5.3	0
5.4	0
5.5	0
5.6	0
5.7	0
5.8	0
5.9	0
6	0
6.1	0
6.2	0
6.3	0
6.4	0
6.5	0
6.6	0
6.7	0
6.8	0
6.9	0
7	0
7.1	0
7.2	0
7.3	0
7.4	0
7.5	0
7.6	0
7.7	0
7.8	0
7.9	0
8	0
8.1	0
8.2	0
8.3	0
8.4	0
8.5	0
8.6	0
8.7	0
8.8	0
8.9	0
9	0
9.1	0
9.2	0
9.3	0
9.4	0
9.5	0
9.6	0
9.7	0
9.8	0
9.9	0
10	0

## Sheet: Figure 3f
Simulated		FCOF-XJ-OP
5	0	5	20364.8
5.05	0	5.02	21381.9
5.1	0	5.04	20610.1
5.15	0	5.06	20631.6
5.2	0	5.08	19617
5.25	0	5.1	19917
5.3	0	5.12	21164
5.35	0	5.14	21038.2
5.4	0	5.16	20471.1
5.45	0	5.18	19352.6
5.5	0	5.2	21732.2
5.55	0	5.22	20171.3
5.6	0	5.24	19274.8
5.65	0	5.26	19834.7
5.7	0	5.28	20233.6
5.75	0	5.3	18451.5
5.8	0	5.32	21195.9
5.85	0	5.34	19649.3
5.9	0	5.36	19525.6
5.95	0	5.38	19304.5
6	0	5.4	20152.5
6.05	0	5.42	18985.3
6.1	0	5.44	19092.7
6.15	0	5.46	19270.5
6.2	0	5.48	20639
6.25	0	5.5	19684.6
6.3	0	5.52	18186.3
6.35	0	5.54	18698
6.4	2.68407	5.56	18428.7
6.45	10.1085	5.58	18228.6
6.5	13.4034	5.6	18532.3
6.55	18.6139	5.62	19296.2
6.6	27.5691	5.64	18612.9
6.65	44.932	5.66	18732.1
6.7	85.6564	5.68	19261.6
6.75	222.081	5.7	18818.3
6.8	2637.43	5.72	19296.9
6.85	4001.4	5.74	18905.9
6.9	284.071	5.76	18876.4
6.95	97.7229	5.78	18465.3
7	49.3919	5.8	18911.1
7.05	29.679	5.82	18794.7
7.1	19.7726	5.84	20110.8
7.15	14.1065	5.86	19693.1
7.2	10.5667	5.88	19736.8
7.25	4.62661	5.9	20914.1
7.3	0	5.92	19053.1
7.35	0	5.94	17495.7
7.4	0	5.96	18972.8
7.45	0	5.98	18682.5
7.5	0	6	18377.9
7.55	0	6.02	17395.3
7.6	0	6.04	17900.1
7.65	0	6.06	17914.3
7.7	0	6.08	17406.7
7.75	0	6.1	18088.1
7.8	0	6.12	16456.2
7.85	0	6.14	18099.7
7.9	0	6.16	17116.6
7.95	0	6.18	17698.4
8	0	6.2	17930
8.05	0	6.22	17261.4
8.1	0	6.24	19437.3
8.15	0	6.26	17713.6
8.2	0	6.28	18241.2
8.25	0	6.3	19433.3
8.3	0	6.32	18262.4
8.35	0	6.34	17481.7
8.4	0	6.36	18508.2
8.45	0	6.38	18275.3
8.5	0	6.4	17010
8.55	0	6.42	17438.6
8.6	0	6.44	18295.3
8.65	0	6.46	17995
8.7	0	6.48	18300.7
8.75	0	6.5	17573.4
8.8	0	6.52	18635
8.85	0	6.54	18415.4
8.9	0	6.56	17352.6
8.95	0	6.58	17604.9
9	0	6.6	17696.2
9.05	0	6.62	18073.8
9.1	0	6.64	19442.6
9.15	0	6.66	19623
9.2	0	6.68	18787.7
9.25	440.631	6.7	18425.5
9.3	737.122	6.72	18854.9
9.35	990.546	6.74	19345
9.4	1401.1	6.76	19153.1
9.45	2131.39	6.78	19755.6
9.5	3624.21	6.8	17714.2
9.55	7461.67	6.82	19843.3
9.6	25471.3	6.84	17468.1
9.65	360000	6.86	16796.8
9.7	128643	6.88	18184.2
9.75	12983.8	6.9	17511.8
9.8	5217.7	6.92	16230.7
9.85	2800.56	6.94	18092.7
9.9	1742.9	6.96	15842.3
9.95	1188.08	6.98	17253.4
10	861.413	7	15309.3
10.05	653.03	7.02	17199.7
10.1	116.552	7.04	16237.5
10.15	0	7.06	16035.5
10.2	0	7.08	16723.8
10.25	0	7.1	15595.7
10.3	0	7.12	16170.1
10.35	0	7.14	16809.4
10.4	0	7.16	16894.4
10.45	0	7.18	16551.5
10.5	0	7.2	16432.1
10.55	0	7.22	15759.1
10.6	0	7.24	16841.5
10.65	0	7.26	16785.4
10.7	0	7.28	15386.4
10.75	0	7.3	15413.5
10.8	0	7.32	16182.7
10.85	0	7.34	16360.6
10.9	0	7.36	14433.8
10.95	5.84117	7.38	14915
11	13.9792	7.4	16319.4
11.05	18.5883	7.42	15313.4
11.1	25.9178	7.44	15498.3
11.15	38.6185	7.46	15397.2
11.2	63.5692	7.48	16368.7
11.25	123.513	7.5	16183.2
11.3	340.705	7.52	15825.8
11.35	4642.5	7.54	15692.8
11.4	4862.18	7.56	16593.1
11.45	400.448	7.58	16022.2
11.5	130.446	7.6	16209.5
11.55	65.9686	7.62	14821.8
11.6	39.7198	7.64	16325
11.65	26.513	7.66	15287.8
11.7	18.946	7.68	15120.4
11.75	14.2109	7.7	15084.7
11.8	5.82208	7.72	15707.5
11.85	0	7.74	14649.6
11.9	0	7.76	15083
11.95	0	7.78	15964.6
12	0	7.8	15957.3
12.05	0	7.82	16431.8
12.1	0	7.84	15642.1
12.15	0	7.86	14914.9
12.2	0	7.88	16284.9
12.25	0	7.9	15218.6
12.3	0	7.92	15343.8
12.35	0	7.94	14776.1
12.4	0	7.96	14432
12.45	0	7.98	17214.1
12.5	0	8	16514.3
12.55	0	8.02	16118.2
12.6	0	8.04	15673.4
12.65	0	8.06	15179.1
12.7	0	8.08	17039.2
12.75	0	8.1	16652.7
12.8	0	8.12	15408.4
12.85	0	8.14	16731.8
12.9	0	8.16	16382.1
12.95	0	8.18	17360.1
13	0	8.2	15456.9
13.05	0	8.22	17455.2
13.1	0	8.24	16236.5
13.15	0	8.26	16653.3
13.2	0	8.28	17021.9
13.25	19.7905	8.3	19213
13.3	50.294	8.32	16764
13.35	66.5845	8.34	17426.5
13.4	92.2828	8.36	16596.3
13.45	136.347	8.38	18079.3
13.5	221.585	8.4	17475.3
13.55	421.32	8.42	18663.2
13.6	1100.46	8.44	19150.4
13.65	13550.1	8.46	18131.3
13.7	19776.4	8.48	18325.1
13.75	2194.83	8.5	18093
13.8	547.283	8.52	18961
13.85	265.876	8.54	19786
13.9	156.848	8.56	19210
13.95	103.415	8.58	20856.2
14	73.2944	8.6	19754.2
14.05	54.6536	8.62	20526.7
14.1	28.5697	8.64	21592.2
14.15	0.55024	8.66	21874.1
14.2	0	8.68	23595.6
14.25	0	8.7	23006.5
14.3	0	8.72	23098.4
14.35	0	8.74	24138
14.4	0	8.76	24411.1
14.45	0	8.78	26170.2
14.5	15.4061	8.8	25433.6
14.55	77.9477	8.82	26597.6
14.6	110.503	8.84	27323.6
14.65	150.913	8.86	29110.7
14.7	218.379	8.88	31594.4
14.75	343.839	8.9	29761.2
14.8	619.43	8.92	33658.1
14.85	1434.25	8.94	31692.3
14.9	10719	8.96	33219
14.95	42022.1	8.98	35439
15	10111.4	9	35892.6
15.05	1453.91	9.02	36525.6
15.1	775.61	9.04	39039.6
15.15	662.303	9.06	42388.8
15.2	936.614	9.08	43155.6
15.25	3822.32	9.1	46514.9
15.3	28516.8	9.12	49257.5
15.35	10207.5	9.14	54145.7
15.4	1023.27	9.16	54988.5
15.45	406.418	9.18	56183.7
15.5	220.542	9.2	60961.1
15.55	138.408	9.22	64712
15.6	94.9457	9.24	73749.3
15.65	69.1744	9.26	77921.1
15.7	52.6409	9.28	85310.7
15.75	13.5596	9.3	91388.8
15.8	0	9.32	99833.2
15.85	0	9.34	108978
15.9	0	9.36	117950
15.95	0	9.38	135310
16	0	9.4	149533
16.05	0	9.42	167926
16.1	0	9.44	188377
16.15	0	9.46	206402
16.2	0	9.48	231357
16.25	0	9.5	250792
16.3	0	9.52	264075
16.35	0	9.54	279281
16.4	0	9.56	283472
16.45	0	9.58	270983
16.5	0	9.6	253356
16.55	0	9.62	227704
16.6	0	9.64	188746
16.65	0	9.66	153825
16.7	0	9.68	119139
16.75	0	9.7	93092.4
16.8	0	9.72	75470.2
16.85	0	9.74	58005.4
16.9	0	9.76	49267.2
16.95	0	9.78	42560.4
17	0	9.8	38465.6
17.05	0	9.82	34286.2
17.1	0	9.84	31148.4
17.15	0	9.86	28386.8
17.2	0	9.88	27596
17.25	0	9.9	27430.5
17.3	0	9.92	24621
17.35	0	9.94	24070.6
17.4	115.112	9.96	22169.7
17.45	210.318	9.98	22462.7
17.5	279.452	10	21555.8
17.55	389.355	10.02	21207.8
17.6	579.854	10.04	19555.9
17.65	954.809	10.06	20101.1
17.7	1861.42	10.08	20479.2
17.75	5323.57	10.1	19907.5
17.8	73123.6	10.12	19288.4
17.85	63875.4	10.14	17251.6
17.9	10230.1	10.16	18984
17.95	2206.77	10.18	18787.7
18	1067.51	10.2	18796.1
18.05	630.232	10.22	18302.6
18.1	416.198	10.24	19360.6
18.15	295.451	10.26	18521.7
18.2	220.625	10.28	17591.8
18.25	116.447	10.3	17551.7
18.3	16.0461	10.32	17510.4
18.35	0	10.34	17642.6
18.4	0	10.36	16857.9
18.45	0	10.38	17696
18.5	0	10.4	16941.6
18.55	0	10.42	18736.1
18.6	0	10.44	18537.6
18.65	0	10.46	16746
18.7	0	10.48	18325.6
18.75	0	10.5	18194.5
18.8	0	10.52	17818.6
18.85	0	10.54	17781.7
18.9	0	10.56	17584.1
18.95	6.79172	10.58	18169.4
19	15.3712	10.6	18186.4
19.05	21.4965	10.62	17026.8
19.1	29.4258	10.64	17352.6
19.15	42.7343	10.66	18265
19.2	67.6973	10.68	18503.4
19.25	123.4	10.7	18724.5
19.3	293.835	10.72	19461.1
19.35	2686.84	10.74	17884.2
19.4	6199.54	10.76	19612.6
19.45	2575.66	10.78	18525.6
19.5	273.727	10.8	19186.8
19.55	115.163	10.82	18713.4
19.6	63.9755	10.84	18457.7
19.65	40.769	10.86	19632.2
19.7	28.2695	10.88	20218.4
19.75	20.7611	10.9	20303.4
19.8	15.6266	10.92	22223.2
19.85	40.0056	10.94	22254.6
19.9	252.5	10.96	22334.2
19.95	427.028	10.98	22994.9
20	573.562	11	23785.8
20.05	811.201	11.02	26590.9
20.1	1235.16	11.04	27503.6
20.15	2109.32	11.06	30213.5
20.2	4399.01	11.08	33994.2
20.25	17976.3	11.1	35574.8
20.3	183989	11.12	38528.3
20.35	105073	11.14	43293.3
20.4	12784	11.16	49055.3
20.45	3558.81	11.18	51463.2
20.5	1853.64	11.2	55326.2
20.55	1677.49	11.22	62738.8
20.6	1378.4	11.24	62763.8
20.65	2480.85	11.26	62593.9
20.7	1530.91	11.28	59492.8
20.75	379.778	11.3	55852.8
20.8	73.0614	11.32	50992.5
20.85	25.0953	11.34	44143.4
20.9	15.3358	11.36	36529.5
20.95	10.3925	11.38	36188.2
21	7.32137	11.4	32938.7
21.05	4.83137	11.42	29686.2
21.1	2.31513	11.44	27338.7
21.15	0.5613	11.46	25790.7
21.2	0	11.48	26732.3
21.25	3.55849	11.5	24169.3
21.3	10.5655	11.52	26615.1
21.35	23.1587	11.54	23691.6
21.4	34.3753	11.56	23642
21.45	48.4911	11.58	24171.5
21.5	71.8661	11.6	24446
21.55	118.527	11.62	22782
21.6	237.367	11.64	23246.3
21.65	1062.88	11.66	22609.6
21.7	6897.74	11.68	22531.8
21.75	5997.41	11.7	22816
21.8	4530.59	11.72	22344.4
21.85	2417.94	11.74	22663.8
21.9	288.054	11.76	22852.3
21.95	129.24	11.78	22107.8
22	76.0452	11.8	22342
22.05	50.5706	11.82	22290.7
22.1	81.8877	11.84	23289.9
22.15	100.746	11.86	23398.2
22.2	119.934	11.88	21954.4
22.25	150.824	11.9	21895.8
22.3	215.362	11.92	22431
22.35	345.557	11.94	22236.1
22.4	645.312	11.96	21835.8
22.45	1634.08	11.98	21739.4
22.5	18738.9	12	21682.9
22.55	22358.5	12.02	22122.1
22.6	12735.1	12.04	21912.7
22.65	1310.63	12.06	21242.6
22.7	557.86	12.08	22615.2
22.75	335.185	12.1	22783.2
22.8	345.264	12.12	21269.2
22.85	1435.02	12.14	21445.1
22.9	813.513	12.16	23009.2
22.95	187.245	12.18	22825.8
23	50.1794	12.2	22906.7
23.05	13.3595	12.22	23689.8
23.1	8.05303	12.24	22071.6
23.15	5.39512	12.26	22358.1
23.2	3.87037	12.28	22234.1
23.25	2.91342	12.3	22180.6
23.3	1.36879	12.32	21634
23.35	0.41579	12.34	23542.4
23.4	0	12.36	22075.9
23.45	0	12.38	23311.2
23.5	0	12.4	24052.8
23.55	0	12.42	24151.2
23.6	0	12.44	24675.8
23.65	0	12.46	23607.6
23.7	0	12.48	23240
23.75	0	12.5	23384.1
23.8	0	12.52	24200.8
23.85	0	12.54	24512.5
23.9	0	12.56	23993.6
23.95	0	12.58	23861.5
24	0	12.6	24131.2
24.05	0	12.62	25150
24.1	0	12.64	24260
24.15	0	12.66	24835.1
24.2	0	12.68	25212.5
24.25	0	12.7	25540.2
24.3	0	12.72	24270.3
24.35	0.21571	12.74	25222.2
24.4	0.82335	12.76	24934.5
24.45	1.91669	12.78	26064.2
24.5	3.11357	12.8	26083.2
24.55	4.23479	12.82	26719.2
24.6	6.1165	12.84	24783.5
24.65	9.69496	12.86	25452.1
24.7	18.2476	12.88	25793.1
24.75	85.7952	12.9	26794.2
24.8	207.513	12.92	27109.4
24.85	1065.03	12.94	25179.2
24.9	473.663	12.96	27132.1
24.95	183.005	12.98	26259.1
25	27.8187	13	25971.5
25.05	13.2146	13.02	25468.5
25.1	7.81337	13.04	27382.2
25.15	5.18571	13.06	26886.5
25.2	3.70102	13.08	26408.9
25.25	2.60437	13.1	25707.4
25.3	1.66556	13.12	27931.2
25.35	2.47347	13.14	27560.8
25.4	4.38746	13.16	26219.3
25.45	7.39422	13.18	27826.7
25.5	9.88291	13.2	27785.7
25.55	13.888	13.22	27413.5
25.6	20.9603	13.24	27920.1
25.65	35.3121	13.26	27823.8
25.7	72.0404	13.28	27559.7
25.75	272.844	13.3	28602.6
25.8	2960.74	13.32	28354
25.85	1320.35	13.34	27474.6
25.9	573.859	13.36	28458.8
25.95	79.8341	13.38	30995
26	61.1644	13.4	30495.1
26.05	60.7428	13.42	29979.2
26.1	73.1302	13.44	31749.5
26.15	89.6941	13.46	32350.1
26.2	121.091	13.48	34541.9
26.25	180.322	13.5	35869.7
26.3	307.861	13.52	36145.9
26.35	669.369	13.54	36539.3
26.4	4020.55	13.56	38835.8
26.45	20747.7	13.58	36715.3
26.5	11397.1	13.6	37778.5
26.55	2393.78	13.62	38534.9
26.6	488.697	13.64	35559
26.65	241.76	13.66	35190.9
26.7	145.348	13.68	33327.9
26.75	97.3357	13.7	33106.3
26.8	69.8493	13.72	32473.3
26.85	52.6081	13.74	33315.5
26.9	28.8439	13.76	32236.2
26.95	12.3076	13.78	31753.2
27	0	13.8	32169.1
27.05	0	13.82	33187.9
27.1	1.28684	13.84	30806.2
27.15	1.99331	13.86	31238.1
27.2	2.9787	13.88	32857.9
27.25	4.02005	13.9	32450.1
27.3	5.72652	13.92	31697.2
27.35	8.82067	13.94	30908.9
27.4	15.3708	13.96	31925.5
27.45	33.5044	13.98	31990.2
27.5	199.103	14	30642.7
27.55	1043.91	14.02	32401.1
27.6	531.642	14.04	32124.5
27.65	145.911	14.06	32682
27.7	25.9486	14.08	32757.4
27.75	19.9006	14.1	34470.7
27.8	22.3737	14.12	34271.3
27.85	30.4604	14.14	34653.6
27.9	37.3991	14.16	35181.9
27.95	51.7776	14.18	34615.4
28	75.6698	14.2	35461.7
28.05	123.858	14.22	34254.7
28.1	239.366	14.24	35073.4
28.15	758.079	14.26	36315.5
28.2	9139.37	14.28	35711.4
28.25	3825.06	14.3	36439.4
28.3	3712.39	14.32	36446.9
28.35	570.439	14.34	38878.5
28.4	2392.16	14.36	36160.7
28.45	1278.21	14.38	39638
28.5	1149.5	14.4	37976.2
28.55	450.339	14.42	39024.8
28.6	98.498	14.44	39602.7
28.65	52.1143	14.46	41556.2
28.7	25.343	14.48	42946
28.75	14.5284	14.5	42236.9
28.8	8.98214	14.52	46046.5
28.85	6.80869	14.54	45888.6
28.9	3.07103	14.56	49518.8
28.95	1.06971	14.58	54606.8
29	0.37523	14.6	58680.8
29.05	0.11006	14.62	66214.6
29.1	0.17921	14.64	72798.6
29.15	0.34908	14.66	79049.3
29.2	1.35926	14.68	89974.1
29.25	10.0674	14.7	97195.3
29.3	10.3151	14.72	108388
29.35	5.42558	14.74	116709
29.4	3.98105	14.76	126354
29.45	0.48825	14.78	131343
29.5	0.20709	14.8	131802
29.55	0.1212	14.82	132775
29.6	0.08042	14.84	126979
29.65	0.72383	14.86	110181
29.7	4.07464	14.88	98247.4
29.75	6.72294	14.9	85046.8
29.8	9.07499	14.92	76899.3
29.85	12.3528	14.94	72481.9
29.9	17.8227	14.96	70968.1
29.95	28.0097	14.98	71077.5
30	50.5221	15	69827.6
30.05	118.965	15.02	73693.2
30.1	1075.88	15.04	76695.7
30.15	2154.5	15.06	84431.9
30.2	1539.41	15.08	86829.5
30.25	341.381	15.1	94366.8
30.3	68.0517	15.12	96637.2
30.35	33.8909	15.14	98141.2
30.4	20.6251	15.16	101939
30.45	14.0384	15.18	100638
30.5	10.3567	15.2	97613.6
30.55	8.05928	15.22	93682.7
30.6	5.26555	15.24	90379.1
30.65	3.03569	15.26	81897.3
30.7	1.82338	15.28	79144.1
30.75	3.37826	15.3	68745.4
30.8	9.16545	15.32	62860.3
30.85	109.989	15.34	59374.9
30.9	74.4781	15.36	55274.4
30.95	90.2679	15.38	52023.3
31	12.4745	15.4	51136.5
31.05	5.37873	15.42	50573.6
31.1	5.4883	15.44	47514.4
31.15	6.99469	15.46	47805.1
31.2	9.06941	15.48	47634.5
31.25	12.6718	15.5	46259.1
31.3	19.2654	15.52	46278.3
31.35	33.9856	15.54	45745.8
31.4	83.0781	15.56	45021.6
31.45	880.187	15.58	44237.8
31.5	789.007	15.6	44916.4
31.55	971.626	15.62	47233
31.6	912.015	15.64	43600.7
31.65	320.681	15.66	44839
31.7	220.803	15.68	46019.5
31.75	34.39	15.7	44308.3
31.8	17.7253	15.72	44366.1
31.85	11.26	15.74	43251.6
31.9	7.89842	15.76	44678.8
31.95	5.0288	15.78	42814
32	11.5688	15.8	47048.7
32.05	17.2099	15.82	44244.5
32.1	27.0961	15.84	45426.3
32.15	35.0973	15.86	46192.6
32.2	47.7483	15.88	46738.7
32.25	69.4968	15.9	45238.2
32.3	110.688	15.92	46275.7
32.35	204.427	15.94	47652.7
32.4	515.841	15.96	46040.8
32.45	5582.35	15.98	45926.7
32.5	6010.58	16	49028.2
32.55	5482.33	16.02	47599
32.6	1254.19	16.04	50089.3
32.65	254.698	16.06	48292.5
32.7	135.055	16.08	50372.6
32.75	92.1461	16.1	49321.7
32.8	76.956	16.12	50961.7
32.85	81.6294	16.14	53125.1
32.9	122.7	16.16	50094.7
32.95	539.381	16.18	52479.8
33	2884.46	16.2	53217.2
33.05	927.23	16.22	53883.1
33.1	1494.98	16.24	54295.7
33.15	283.173	16.26	56843.5
33.2	346.646	16.28	59072.7
33.25	58.9835	16.3	59765.9
33.3	26.5718	16.32	60564.5
33.35	16.9025	16.34	63578.5
33.4	11.9111	16.36	64672.2
33.45	8.91268	16.38	69886.4
33.5	4.00913	16.4	74309.4
33.55	2.85263	16.42	80753.2
33.6	0.6745	16.44	85379
33.65	0.37489	16.46	87410.6
33.7	0.00377	16.48	98334
33.75	0	16.5	103081
33.8	0	16.52	114899
33.85	0	16.54	117526
33.9	0	16.56	125285
33.95	0.11742	16.58	129924
34	1.83529	16.6	133807
34.05	2.60424	16.62	140936
34.1	4.93549	16.64	139485
34.15	10.3254	16.66	142696
34.2	15.4382	16.68	135004
34.25	23.6286	16.7	131017
34.3	35.6476	16.72	120195
34.35	60.8216	16.74	111638
34.4	174.013	16.76	103263
34.45	1439.74	16.78	95242.6
34.5	519.511	16.8	89870.8
34.55	1510.64	16.82	83825.3
34.6	2469.55	16.84	80722.4
34.65	2462.78	16.86	76842.7
34.7	2224.06	16.88	73657.2
34.75	856.352	16.9	71500.5
34.8	255.258	16.92	69536.7
34.85	73.6859	16.94	69091.6
34.9	47.9675	16.96	71678.9
34.95	36.6333	16.98	73330.2
35	34.0427	17	71602.4
35.05	33.3743	17.02	71960
35.1	36.7046	17.04	72158.6
35.15	44.7956	17.06	71977.5
35.2	67.3503	17.08	72665.5
35.25	128.775	17.1	74184.5
35.3	607.952	17.12	74372
35.35	2336.43	17.14	77450.9
35.4	4170.76	17.16	78514.2
35.45	1835.46	17.18	79802.1
35.5	1401.72	17.2	81161.5
35.55	173.569	17.22	84738.1
35.6	83.675	17.24	87351.1
35.65	53.9724	17.26	92375.5
35.7	43.4478	17.28	93051.4
35.75	40.9706	17.3	100641
35.8	50.824	17.32	104099
35.85	185.849	17.34	111953
35.9	152.705	17.36	119073
35.95	739.617	17.38	128476
36	655.869	17.4	140842
36.05	1580.8	17.42	151276
36.1	1823.62	17.44	172172
36.15	937.818	17.46	193848
36.2	626.23	17.48	212864
36.25	84.3929	17.5	238793
36.3	40.1338	17.52	260032
36.35	24.2443	17.54	290171
36.4	16.2903	17.56	314919
36.45	11.7358	17.58	341440
36.5	7.90891	17.6	358120
36.55	6.08451	17.62	371134
36.6	1.91357	17.64	383173
36.65	1.45451	17.66	386549
36.7	0	17.68	376222
36.75	4.20874	17.7	353581
36.8	5.32665	17.72	320449
36.85	10.326	17.74	287380
36.9	13.9671	17.76	248120
36.95	26.0088	17.78	212102
37	36.4917	17.8	183974
37.05	57.2301	17.82	157825
37.1	94.0175	17.84	140474
37.15	200.335	17.86	128030
37.2	1616.16	17.88	119126
37.25	2391.31	17.9	111537
37.3	1676.81	17.92	105925
37.35	2260.57	17.94	97859.9
37.4	2663.64	17.96	96971.4
37.45	5140.62	17.98	94013.7
37.5	1707.91	18	89924.9
37.55	2153.79	18.02	89569.6
37.6	254.811	18.04	91153.3
37.65	109.693	18.06	85709
37.7	65.5278	18.08	83663.7
37.75	41.0141	18.1	88284.4
37.8	29.3266	18.12	86040.4
37.85	19.3872	18.14	83754.9
37.9	14.5123	18.16	82300.1
37.95	6.2209	18.18	83546.1
38	3.68297	18.2	83443.5
38.05	0.43873	18.22	82596.3
38.1	0	18.24	81338.6
38.15	0	18.26	83775.4
38.2	0	18.28	83749.7
38.25	0	18.3	82608.1
38.3	0	18.32	82883.9
38.35	0	18.34	86040.2
38.4	0	18.36	83877.1
38.45	0	18.38	85125.9
38.5	0	18.4	86151.2
38.55	0	18.42	81795.7
38.6	0	18.44	82363.6
38.65	0	18.46	88882.3
38.7	0	18.48	84542.6
38.75	0	18.5	84503.5
38.8	0	18.52	85652.7
38.85	0.09519	18.54	84701.6
38.9	0.12579	18.56	86662.9
38.95	0.20581	18.58	89021.9
39	0.27116	18.6	86527.1
39.05	0.36383	18.62	86231.6
39.1	0.51449	18.64	90351.2
39.15	0.78494	18.66	89919
39.2	1.34928	18.68	91729.5
39.25	2.8783	18.7	91230.2
39.3	16.8593	18.72	90690.2
39.35	85.216	18.74	91532.3
39.4	18.88	18.76	92242.9
39.45	50.6933	18.78	95244.7
39.5	14.7449	18.8	92398.6
39.55	14.553	18.82	96877.8
39.6	18.2086	18.84	95101.8
39.65	25.288	18.86	99974.4
39.7	39.1932	18.88	100134
39.75	73.6328	18.9	101770
39.8	384.994	18.92	103016
39.85	907.838	18.94	106651
39.9	1443.06	18.96	109094
39.95	2870.16	18.98	113007
40	768.468	19	114711
	--	19.02	117113
		19.04	120084
		19.06	124553
		19.08	127390
		19.1	131791
		19.12	136789
		19.14	138696
		19.16	142739
		19.18	145236
		19.2	145225
		19.22	148756
		19.24	143188
		19.26	145886
		19.28	144567
		19.3	139137
		19.32	141438
		19.34	137117
		19.36	132648
		19.38	129449
		19.4	129652
		19.42	128347
		19.44	124984
		19.46	125995
		19.48	128093
		19.5	133221
		19.52	132469
		19.54	134414
		19.56	142483
		19.58	146477
		19.6	149892
		19.62	155336
		19.64	164476
		19.66	168841
		19.68	180636
		19.7	191135
		19.72	204930
		19.74	217687
		19.76	230109
		19.78	247132
		19.8	266111
		19.82	290231
		19.84	314677
		19.86	350054
		19.88	375506
		19.9	419877
		19.92	463336
		19.94	516620
		19.96	565804
		19.98	616740
		20	672871
		20.02	729834
		20.04	773179
		20.06	818224
		20.08	847053
		20.1	860693
		20.12	870314
		20.14	840502
		20.16	808718
		20.18	763505
		20.2	690422
		20.22	618089
		20.24	532544
		20.26	464902
		20.28	396144
		20.3	345983
		20.32	305558
		20.34	268124
		20.36	249305
		20.38	231256
		20.4	213012
		20.42	201372
		20.44	191760
		20.46	182311
		20.48	169113
		20.5	158957
		20.52	149116
		20.54	137504
		20.56	129467
		20.58	123746
		20.6	117838
		20.62	111524
		20.64	108960
		20.66	103562
		20.68	101631
		20.7	98684.6
		20.72	97476.6
		20.74	96695.8
		20.76	93694.2
		20.78	94111.3
		20.8	90821.9
		20.82	89922.6
		20.84	91396.7
		20.86	89829.9
		20.88	89226.1
		20.9	84096.6
		20.92	87912.1
		20.94	86907.3
		20.96	87282
		20.98	85213.2
		21	85212.2
		21.02	86249.9
		21.04	86688.9
		21.06	84798.8
		21.08	85209.1
		21.1	85967.3
		21.12	85927.4
		21.14	85815.2
		21.16	87701.3
		21.18	87680.1
		21.2	90324.3
		21.22	93789.8
		21.24	95195.3
		21.26	97059
		21.28	97738.9
		21.3	102404
		21.32	105390
		21.34	111470
		21.36	116162
		21.38	123054
		21.4	125130
		21.42	132537
		21.44	137513
		21.46	140056
		21.48	146364
		21.5	144325
		21.52	149533
		21.54	147983
		21.56	148067
		21.58	142941
		21.6	140879
		21.62	136174
		21.64	127651
		21.66	123357
		21.68	116667
		21.7	109222
		21.72	104160
		21.74	99718.1
		21.76	96120.6
		21.78	90894.4
		21.8	89442.2
		21.82	88377.1
		21.84	87470.2
		21.86	86324.4
		21.88	86274.1
		21.9	87080.9
		21.92	87512.3
		21.94	86689.1
		21.96	86528.9
		21.98	88837.4
		22	91664.1
		22.02	93757.9
		22.04	95723.6
		22.06	97178.5
		22.08	102658
		22.1	107606
		22.12	110574
		22.14	112574
		22.16	115911
		22.18	126550
		22.2	129908
		22.22	134949
		22.24	140918
		22.26	147731
		22.28	149488
		22.3	156814
		22.32	158201
		22.34	156223
		22.36	159126
		22.38	154665
		22.4	154164
		22.42	149916
		22.44	143154
		22.46	140504
		22.48	134150
		22.5	132720
		22.52	125654
		22.54	122945
		22.56	120359
		22.58	119785
		22.6	115744
		22.62	112737
		22.64	108887
		22.66	107680
		22.68	104011
		22.7	96435.7
		22.72	93334.5
		22.74	89124.9
		22.76	83907.7
		22.78	79952
		22.8	76120.4
		22.82	75160.6
		22.84	71928.6
		22.86	69214.4
		22.88	68643.1
		22.9	65784
		22.92	66726.7
		22.94	62996.5
		22.96	60826.7
		22.98	58914.7
		23	60915.1
		23.02	58838.1
		23.04	60200
		23.06	59505.4
		23.08	58410.3
		23.1	57820.7
		23.12	57624.5
		23.14	57795.1
		23.16	57068.7
		23.18	55612.9
		23.2	55272.6
		23.22	57110.4
		23.24	54892.2
		23.26	54145.8
		23.28	53054.6
		23.3	55654.2
		23.32	56624.3
		23.34	53466
		23.36	54856.7
		23.38	53292.4
		23.4	53530.5
		23.42	55014.8
		23.44	54419.1
		23.46	54958.8
		23.48	53752.8
		23.5	54317.4
		23.52	53619.3
		23.54	54725.4
		23.56	53898.7
		23.58	54073.5
		23.6	51662.2
		23.62	53901.9
		23.64	54570.8
		23.66	53064.9
		23.68	52050.6
		23.7	55003.8
		23.72	54432.8
		23.74	53358.3
		23.76	53652
		23.78	53415.2
		23.8	53059.3
		23.82	51571.8
		23.84	53240.8
		23.86	52954.9
		23.88	51381.7
		23.9	53330
		23.92	53292.7
		23.94	55573.7
		23.96	55299.2
		23.98	54754.3
		24	55654.3
		24.02	57308.5
		24.04	58177.7
		24.06	56181.8
		24.08	59431.8
		24.1	62113.8
		24.12	63294.4
		24.14	65765
		24.16	64829.6
		24.18	66657.2
		24.2	68208.3
		24.22	71454.8
		24.24	74426.8
		24.26	78009.2
		24.28	76954.7
		24.3	83570.3
		24.32	83890.8
		24.34	87149.2
		24.36	86138.7
		24.38	85989.8
		24.4	87275.3
		24.42	89039.8
		24.44	88180.7
		24.46	87159.7
		24.48	88647.6
		24.5	88253
		24.52	87031.3
		24.54	84826.6
		24.56	83049.5
		24.58	82938.7
		24.6	82967.3
		24.62	79846.2
		24.64	76802.7
		24.66	76563.7
		24.68	75068.6
		24.7	71520.5
		24.72	70034.3
		24.74	66478.2
		24.76	62452.5
		24.78	61838.3
		24.8	58605.5
		24.82	58117.5
		24.84	54851.3
		24.86	54218.7
		24.88	53326
		24.9	52843.8
		24.92	51323.2
		24.94	51718.1
		24.96	49696.5
		24.98	50594.8
		25	50454.6
		25.02	49332.6
		25.04	50128.5
		25.06	49224.2
		25.08	50502.5
		25.1	48135.7
		25.12	48706.1
		25.14	48423.9
		25.16	50955.2
		25.18	50874.4
		25.2	51681.9
		25.22	51110.4
		25.24	51392.5
		25.26	52559.8
		25.28	55925.1
		25.3	55995.3
		25.32	57126.4
		25.34	58091.5
		25.36	59420.8
		25.38	58401.4
		25.4	62191.1
		25.42	63269.8
		25.44	67721.6
		25.46	66532
		25.48	71310.4
		25.5	68122.7
		25.52	70952.3
		25.54	72447.2
		25.56	71796.2
		25.58	71391
		25.6	71024.1
		25.62	71028.3
		25.64	70671.9
		25.66	67179.6
		25.68	64593
		25.7	63433.3
		25.72	64022.4
		25.74	61537.7
		25.76	62248.1
		25.78	60403
		25.8	59747.5
		25.82	59196.7
		25.84	60995.8
		25.86	59358
		25.88	65106.8
		25.9	62889.2
		25.92	66785.2
		25.94	65377.9
		25.96	71178.8
		25.98	72617.6
		26	76441.6
		26.02	80697.6
		26.04	83459.2
		26.06	87233.1
		26.08	93919.5
		26.1	97739.7
		26.12	100872
		26.14	105485
		26.16	108075
		26.18	107652
		26.2	110076
		26.22	109525
		26.24	112619
		26.26	111117
		26.28	111398
		26.3	104769
		26.32	102897
		26.34	95785.3
		26.36	91126.9
		26.38	86035.1
		26.4	78594.5
		26.42	75666
		26.44	69350.8
		26.46	63160.2
		26.48	61000.3
		26.5	59698.4
		26.52	57802.5
		26.54	54221.7
		26.56	53260.5
		26.58	51389.8
		26.6	50918.9
		26.62	49167.8
		26.64	48400
		26.66	45877.4
		26.68	45262.6
		26.7	46031.9
		26.72	43579.1
		26.74	44158
		26.76	44384.4
		26.78	43200.7
		26.8	42775.7
		26.82	43540.3
		26.84	41800.7
		26.86	41219.7
		26.88	42534.3
		26.9	43085.7
		26.92	42953.7
		26.94	42670.3
		26.96	42718.6
		26.98	41102.9
		27	42280.2
		27.02	42186.3
		27.04	43133.3
		27.06	42713.3
		27.08	42965.9
		27.1	42239.7
		27.12	44779.9
		27.14	42436.1
		27.16	45258.9
		27.18	46699.8
		27.2	43897.3
		27.22	45837.3
		27.24	47423.4
		27.26	47737.8
		27.28	45212.7
		27.3	45986.2
		27.32	48527
		27.34	47878.3
		27.36	48143.5
		27.38	45035.9
		27.4	46908.8
		27.42	46045.4
		27.44	45056.6
		27.46	43934.3
		27.48	46371.8
		27.5	40731.8
		27.52	41153.6
		27.54	42937.1
		27.56	41891.1
		27.58	42505.8
		27.6	42451.4
		27.62	42073.2
		27.64	42636.3
		27.66	41801
		27.68	42939.4
		27.7	42261.2
		27.72	41531.2
		27.74	42560.7
		27.76	41824.3
		27.78	42987.9
		27.8	42641.3
		27.82	43453.7
		27.84	43029.1
		27.86	44538.3
		27.88	44972.8
		27.9	44692.1
		27.92	46415
		27.94	47372.1
		27.96	47288
		27.98	48648.3
		28	48766.4
		28.02	50467.7
		28.04	51493.3
		28.06	52009.7
		28.08	51491.7
		28.1	52326.8
		28.12	52414.1
		28.14	55026.1
		28.16	54517.5
		28.18	53679.6
		28.2	52316.3
		28.22	55158.7
		28.24	54081.1
		28.26	53547.2
		28.28	52986.5
		28.3	50508.1
		28.32	50108.3
		28.34	47268.4
		28.36	46644
		28.38	45705.5
		28.4	44347.3
		28.42	43925.9
		28.44	41050.8
		28.46	42393.2
		28.48	41987.1
		28.5	40912.1
		28.52	41009.3
		28.54	39807.7
		28.56	40667.6
		28.58	40703.2
		28.6	38348.1
		28.62	40822.8
		28.64	40025.7
		28.66	40974.6
		28.68	42458.3
		28.7	40414.2
		28.72	41471.4
		28.74	43787
		28.76	43802.1
		28.78	41986.3
		28.8	42748.8
		28.82	44258.8
		28.84	45222.2
		28.86	46924
		28.88	48215.8
		28.9	48885.3
		28.92	52139
		28.94	52467.2
		28.96	54480
		28.98	56388.4
		29	55032.5
		29.02	56072.8
		29.04	56392.6
		29.06	56272.7
		29.08	58409.6
		29.1	56604.9
		29.12	56485
		29.14	53334
		29.16	52513
		29.18	50401.9
		29.2	49426.1
		29.22	48041.5
		29.24	44307.3
		29.26	44825.5
		29.28	46444.6
		29.3	41697.2
		29.32	43500.7
		29.34	42132.6
		29.36	41797
		29.38	42900.1
		29.4	41863.1
		29.42	43253.7
		29.44	43706.2
		29.46	43703
		29.48	43348.5
		29.5	43539.6
		29.52	44512.6
		29.54	47878
		29.56	47473.8
		29.58	48358.4
		29.6	48952.9
		29.62	49569.5
		29.64	50763
		29.66	51329.5
		29.68	52772.4
		29.7	52704.2
		29.72	51736.6
		29.74	52665.1
		29.76	49494.7
		29.78	50710.6
		29.8	52627.3
		29.82	50594.6
		29.84	48176.2
		29.86	48999.6
		29.88	47844.2
		29.9	45929.3
		29.92	45010.7
		29.94	44783.3
		29.96	43109
		29.98	43426
		30	40677.8
		30.02	40238.2
		30.04	39094.6
		30.06	38326.2
		30.08	37086.2
		30.1	36077.1
		30.12	36271
		30.14	35754.6
		30.16	35446.6
		30.18	37048.2
		30.2	35382.5
		30.22	36381.3
		30.24	35358.2
		30.26	35396.5
		30.28	33165.7
		30.3	35644.9
		30.32	35776.6
		30.34	36492.9
		30.36	34766.3
		30.38	36079
		30.4	37120.5
		30.42	35244.5
		30.44	35033.8
		30.46	36933
		30.48	37259.3
		30.5	38037.2
		30.52	37081.6
		30.54	36913.9
		30.56	39134
		30.58	38816.9
		30.6	38865.4
		30.62	40005.6
		30.64	39947.4
		30.66	39239.3
		30.68	40320.6
		30.7	41070.9
		30.72	40818.2
		30.74	39217.9
		30.76	40143.9
		30.78	39161.3
		30.8	38036.9
		30.82	38277.2
		30.84	39538.1
		30.86	37784.5
		30.88	37903.7
		30.9	38046.5
		30.92	39708.5
		30.94	38449.9
		30.96	37532.4
		30.98	39599.1
		31	39334.7
		31.02	38865.7
		31.04	40491.5
		31.06	40119.1
		31.08	41125.4
		31.1	42891.9
		31.12	42204
		31.14	43253.8
		31.16	43038.4
		31.18	43662.3
		31.2	42611.7
		31.22	45046.1
		31.24	44828.2
		31.26	44409.8
		31.28	44941.6
		31.3	46000.5
		31.32	45438
		31.34	44758
		31.36	40707.5
		31.38	42882.7
		31.4	41294.2
		31.42	41223.1
		31.44	40183.3
		31.46	37878.2
		31.48	37019.9
		31.5	36844
		31.52	37438.4
		31.54	37171.4
		31.56	35223.6
		31.58	34036
		31.6	34090.1
		31.62	32985
		31.64	34085.8
		31.66	33310.1
		31.68	33159.1
		31.7	33294.8
		31.72	32411.4
		31.74	30706.2
		31.76	30964.2
		31.78	31553.3
		31.8	32020.3
		31.82	30512.5
		31.84	30934.8
		31.86	28943
		31.88	30316.4
		31.9	30776.2
		31.92	29404.4
		31.94	30914.1
		31.96	31977.3
		31.98	29044.2
		32	30708.2
		32.02	31033.7
		32.04	31735.5
		32.06	29960.5
		32.08	30882.8
		32.1	31093.1
		32.12	32401
		32.14	31900.7
		32.16	32349
		32.18	31561.8
		32.2	30731.2
		32.22	31003.5
		32.24	31971.3
		32.26	31710.3
		32.28	31563.4
		32.3	31395.8
		32.32	31011
		32.34	30891.5
		32.36	29852.8
		32.38	30998.3
		32.4	30197.2
		32.42	30401.8
		32.44	30390.6
		32.46	31479
		32.48	30989.3
		32.5	30853.3
		32.52	31428.2
		32.54	31733.4
		32.56	31238.3
		32.58	33410.2
		32.6	32823.1
		32.62	32176.2
		32.64	32414.9
		32.66	34464.1
		32.68	33751.7
		32.7	34866.2
		32.72	37599.4
		32.74	34971
		32.76	34069.8
		32.78	35309
		32.8	35217.7
		32.82	35314.3
		32.84	34663.9
		32.86	33567.9
		32.88	33774.5
		32.9	32670.5
		32.92	33660.3
		32.94	31407.8
		32.96	29840.8
		32.98	30926.8
		33	31082
		33.02	30420.3
		33.04	29565
		33.06	29858.4
		33.08	29463.2
		33.1	27254.6
		33.12	27789.9
		33.14	28607.8
		33.16	27678.8
		33.18	26654.2
		33.2	27099
		33.22	27393.3
		33.24	26853.2
		33.26	26335.7
		33.28	26987
		33.3	27836.8
		33.32	27203.8
		33.34	27786.3
		33.36	27504.3
		33.38	27953.8
		33.4	27518
		33.42	27073.2
		33.44	28498.9
		33.46	28316.6
		33.48	28902.2
		33.5	29201
		33.52	28392
		33.54	28424.6
		33.56	29342.7
		33.58	28100.9
		33.6	30319.8
		33.62	29166.8
		33.64	30712.5
		33.66	31000.4
		33.68	27422
		33.7	30137.7
		33.72	30117.8
		33.74	29906.3
		33.76	29689.6
		33.78	29157.6
		33.8	30329.8
		33.82	29588.9
		33.84	30364.2
		33.86	28972.5
		33.88	30618.4
		33.9	29341
		33.92	29199.3
		33.94	31812.3
		33.96	31754.8
		33.98	29563.4
		34	30358.8
		34.02	30531.3
		34.04	30632.1
		34.06	31001.8
		34.08	33071.9
		34.1	33013.6
		34.12	35237.1
		34.14	35056.4
		34.16	35666.3
		34.18	36486.4
		34.2	35960.7
		34.22	36108.6
		34.24	35263
		34.26	34957.5
		34.28	34321.5
		34.3	35058.5
		34.32	34362
		34.34	33697.8
		34.36	33938.8
		34.38	32518.2
		34.4	32847.3
		34.42	29843.4
		34.44	29925.9
		34.46	30414.6
		34.48	29527.8
		34.5	28850.1
		34.52	28209.8
		34.54	27299.7
		34.56	27430.5
		34.58	26977.3
		34.6	26544.1
		34.62	27118.8
		34.64	27139.7
		34.66	26989.3
		34.68	26305.7
		34.7	26495.4
		34.72	27145.9
		34.74	26583.7
		34.76	26707.7
		34.78	27751.2
		34.8	26888.5
		34.82	27525.9
		34.84	26380.2
		34.86	28093.3
		34.88	29176.8
		34.9	28893
		34.92	29721.9
		34.94	30454.3
		34.96	30000.1
		34.98	32953.7
		35	33134.6
		35.02	31822
		35.04	32884.2
		35.06	33283.4
		35.08	34267.8
		35.1	33475.6
		35.12	35922.4
		35.14	33320.3
		35.16	34182
		35.18	32724.9
		35.2	33232.5
		35.22	31335
		35.24	31841.1
		35.26	30774.8
		35.28	29444.6
		35.3	28515.4
		35.32	29327
		35.34	28142.6
		35.36	27768.4
		35.38	27301.8
		35.4	27641
		35.42	28184.3
		35.44	28073.4
		35.46	27144.2
		35.48	27963.7
		35.5	27653
		35.52	28455.4
		35.54	28439.8
		35.56	28861.5
		35.58	28577.3
		35.6	28375.5
		35.62	29227.7
		35.64	29661.1
		35.66	28355.9
		35.68	28483.8
		35.7	29294.2
		35.72	26725.5
		35.74	27875.1
		35.76	27576.8
		35.78	27779.3
		35.8	27693.3
		35.82	26731.3
		35.84	27636.3
		35.86	27343.4
		35.88	25910.3
		35.9	26586.9
		35.92	25617.4
		35.94	24780.2
		35.96	24339.3
		35.98	23105.7
		36	23517.6
		36.02	23734
		36.04	24383.6
		36.06	22658.7
		36.08	23894.4
		36.1	23825.1
		36.12	22505.4
		36.14	23025.4
		36.16	22237.5
		36.18	24031.7
		36.2	23964.1
		36.22	22087.8
		36.24	22332.5
		36.26	22478.2
		36.28	21838.6
		36.3	21293.1
		36.32	21762.1
		36.34	22432.8
		36.36	23078.3
		36.38	21529.3
		36.4	21824.7
		36.42	22955.9
		36.44	21255.4
		36.46	22140
		36.48	22584.8
		36.5	23040.8
		36.52	21989.1
		36.54	22475.6
		36.56	23224.6
		36.58	23348.9
		36.6	22113.8
		36.62	23529.6
		36.64	23085.3
		36.66	22623.1
		36.68	24266.9
		36.7	24348
		36.72	22607.2
		36.74	23726.4
		36.76	23599.4
		36.78	24479.9
		36.8	23387.2
		36.82	25458
		36.84	25288.4
		36.86	25341.6
		36.88	27453.3
		36.9	26629.6
		36.92	27044.8
		36.94	27255.7
		36.96	25701.1
		36.98	27872.2
		37	29439.4
		37.02	30367.8
		37.04	29291.5
		37.06	29154.3
		37.08	30044.6
		37.1	29442.5
		37.12	30019.2
		37.14	31520.1
		37.16	29906.8
		37.18	29843.6
		37.2	28827.1
		37.22	28589.1
		37.24	28574
		37.26	27938.5
		37.28	26702.3
		37.3	27244.2
		37.32	27043.6
		37.34	26755.7
		37.36	25762
		37.38	24217
		37.4	24368.1
		37.42	22683
		37.44	24016.3
		37.46	23409.2
		37.48	22506.8
		37.5	23345.8
		37.52	23276.1
		37.54	23947.1
		37.56	23465.1
		37.58	24035.8
		37.6	23697.4
		37.62	22426.3
		37.64	22475.4
		37.66	21994.3
		37.68	23162.8
		37.7	22447.5
		37.72	21838.4
		37.74	22921.5
		37.76	24016.3
		37.78	23174
		37.8	23203.2
		37.82	23081.3
		37.84	23162.4
		37.86	23149.2
		37.88	22824.7
		37.9	22482.8
		37.92	22050.9
		37.94	21365.2
		37.96	22175.1
		37.98	22201.9
		38	22969.2
		38.02	22104.1
		38.04	21644.9
		38.06	22494.1
		38.08	21465.1
		38.1	21422.3
		38.12	21006.7
		38.14	22148.2
		38.16	21598
		38.18	21720.2
		38.2	22583.9
		38.22	21839.7
		38.24	20057.8
		38.26	21617.1
		38.28	19688.8
		38.3	21566.9
		38.32	22589.9
		38.34	20962.9
		38.36	19896.9
		38.38	19867.1
		38.4	21580.8
		38.42	21173.3
		38.44	21905.7
		38.46	19841
		38.48	19173.8
		38.5	21103.9
		38.52	21070.7
		38.54	21550.8
		38.56	20809.7
		38.58	20605.6
		38.6	18774.2
		38.62	20821.2
		38.64	20127.8
		38.66	20544.4
		38.68	19799.1
		38.7	18602.3
		38.72	19934.7
		38.74	20228.1
		38.76	20324
		38.78	20743.1
		38.8	19627.2
		38.82	21293.7
		38.84	21230.6
		38.86	19956.4
		38.88	20057.9
		38.9	20318.7
		38.92	20640.6
		38.94	21283.3
		38.96	20486.2
		38.98	21146.4
		39	20379.6
		39.02	20775.3
		39.04	20429.6
		39.06	21196.3
		39.08	21083
		39.1	20493.3
		39.12	21662.6
		39.14	20495.3
		39.16	20843.4
		39.18	20844.3
		39.2	21172.9
		39.22	21591.6
		39.24	21279.7
		39.26	21086.7
		39.28	21169
		39.3	21606.9
		39.32	21926.4
		39.34	22545.3
		39.36	23015.6
		39.38	22658.4
		39.4	20881.8
		39.42	22531.8
		39.44	23195.5
		39.46	22241.6
		39.48	23435.3
		39.5	23745.7
		39.52	23692.5
		39.54	23134.8
		39.56	24408.3
		39.58	22860.1
		39.6	23515.5
		39.62	24142.8
		39.64	24196.7
		39.66	23945.7
		39.68	25641.5
		39.7	23717.3
		39.72	23535.3
		39.74	23575.5
		39.76	24461.7
		39.78	22559.7
		39.8	23060.2
		39.82	22517
		39.84	22429.1
		39.86	23129.6
		39.88	21588.5
		39.9	22023.7
		39.92	20940.9
		39.94	21044.4
		39.96	21341.7
		39.98	21441.5
		40	21320

## Sheet: Figure 4a
273 K Xe				273 K Kr
0.00473	0.06	0.99701	67.1035	0.01666	0.0292	0.9992	5.4204
0.02074	0.4417	0.95509	66.3224	0.03042	0.0781	0.95821	5.29963
0.03688	0.6844	0.90822	65.404	0.04404	0.1525	0.93849	5.2074
0.05293	1.0198	0.83024	64.985	0.05775	0.1876	0.90982	5.0712
0.06899	1.2972	0.77919	64.5401	0.07137	0.2286	0.88542	4.92712
0.08513	1.4819	0.73108	63.9202	0.08481	0.3482	0.83533	4.6686
0.10119	1.7014	0.67897	62.9961	0.09821	0.4206	0.79305	4.4625
0.11719	1.9092	0.6309	61.94	0.1249	0.5049	0.73966	4.2536
0.13316	2.1055	0.57958	61.0067	0.15127	0.6265	0.6876	4.0025
0.14898	2.412	0.53096	59.714	0.16435	0.6693	0.63604	3.70825
0.16499	2.5618	0.48041	58.516	0.17921	0.7473	0.58871	3.43692
0.18072	2.903	0.43079	56.777	0.19389	0.8035	0.53523	3.1425
0.19664	2.9716	0.38056	54.976	0.22296	0.901	0.49202	2.87541
0.21237	3.1969	0.32995	51.4369	0.25168	1.022	0.43877	2.59336
0.2281	3.3931	0.28829	45.218	0.26594	1.088	0.38978	2.3232
0.24374	3.6532	0.2503	36.5076	0.28002	1.1659	0.33727	2.0782
0.25952	3.7739	0.2209	28.9236	0.29406	1.2634	0.2892	1.82036
0.27516	4.0049	0.1986	20.3869	0.35162	1.4816	0.23856	1.5263
0.29066	4.2882	0.1766	13.5526	0.39001	1.6637	0.18517	1.24925
0.30612	4.589	0.16044	9.16072	0.44836	1.8811	0.13829	1.01189
0.33662	5.3783	0.13416	6.83615	0.50083	2.1084	0.08688	0.76752
0.38708	7.3178	0.09406	5.37068	0.53867	2.3923
0.4318	14.4947	--	--	0.58825	2.6212
0.44445	16.5884	--	--	0.64971	2.8368
0.48445	23.4748	--	--	0.69805	3.0947
0.53165	29.0733	--	--	0.74681	3.4766
0.54591	30.8475	--	--	0.79534	3.7891
0.59164	36.1352	--	--	0.84368	4.0462
0.63558	42.0788	--	--	0.89152	4.3859
0.68544	47.5139	--	--	0.94445	4.6811
0.73603	50.8153	--	--	0.98477	4.9033
0.78213	54.5883	--	--	0.9992	5.4204
0.79529	55.6786	--	--
0.83854	58.187	--	--
0.88684	60.9847	--	--
0.93427	63.7078	--	--
0.97394	65.9519	--	--
0.98555	66.5013	--	--
0.99701	67.1035	--	--

## Sheet: Figure 4b
298 K Xe				298 K Kr
4.395e-06	0.0477	0.99892	45.7708	0.03156	0	0.99938	1.9964
0.01023	0.1618	0.95537	45.7708	0.04546	0.0501	0.95165	1.94025
0.02046	0.1752	0.91432	45.5431	0.05931	0.0593	0.90858	1.8233
0.03074	0.2703	0.89647	45.4591	0.07307	0.0593	0.83533	1.70032
0.04087	0.4562	0.84221	44.727	0.08669	0.1243	0.79305	1.6125
0.05105	0.5559	0.79332	44.0471	0.10027	0.1243	0.73966	1.53806
0.07133	0.6934	0.74374	43.1823	0.11375	0.1821	0.6876	1.42715
0.09151	0.9028	0.69516	42.0983	0.12715	0.216	0.63604	1.33715
0.11169	1.0114	0.64604	40.8737	0.1405	0.216	0.58871	1.23362
0.12164	1.2066	0.59572	39.2369	0.1538	0.2258	0.53523	1.12745
0.15155	1.4058	0.54779	37.0086	0.16701	0.2695	0.49202	1.0425
0.17132	1.6191	0.5028	32.2041	0.19324	0.3093	0.43877	0.94625
0.20453	1.857	0.45748	22.8139	0.21948	0.3781	0.38978	0.82395
0.22654	2.0433	0.40574	14.0886	0.24553	0.4278	0.33727	0.73622
0.24842	2.1523	0.34745	8.7809	0.27145	0.4704	0.2892	0.65632
0.27025	2.2805	0.29984	6.9643	0.29722	0.477	0.23856	0.57215
0.30259	2.6126	0.24819	5.5193	0.33947	0.513	0.18517	0.46663
0.35474	3.1784	0.19127	4.3227	0.39079	0.5837	0.13829	0.37851
0.3946	3.6107	0.14907	3.4829	0.44074	0.7283	0.08688	0.27275
0.44546	3.971	0.09555	2.5213	0.49032	0.8638
0.49569	4.566	--	--	0.54068	0.914
0.54541	5.3049	--	--	0.5904	1.0277
0.59536	6.1514	--	--	0.64012	1.1125
0.64485	7.0214	--	--	0.68925	1.1859
0.6937	9.0068	--	--	0.73888	1.3338
0.7425	12.0966	--	--	0.78814	1.4145
0.78983	17.8362	--	--	0.8379	1.4827
0.84189	24.3451	--	--	0.88721	1.5756
0.89702	31.4352	--	--	0.93615	1.7465
0.94271	36.6904	--	--	0.98215	1.8137
0.98353	40.0847	--	--	0.99938	1.9964
0.99892	45.7708	--	--	--	--
--	--	--	--
--	--	--	--
--	--	--	--
--	--	--	--
--	--	--	--
--	--	--	--
--	--	--	--

[truncated: 3 more sheets: Figure 4c, Figure 4d, Figure 5]
